# Supplementary material for: Functional implications of aging-related lncRNAs for predicting prognosis and immune status in glioma patients
Source: Aging (Albany NY). 2022 Mar 10;14(5):2348–66. doi: 10.18632/aging.203944 (PMC8954967; doi:10.18632/aging.203944)
Supplement: Supplementary Tables 1-3 [file aging-14-203944-s002.xlsx]

## Sheet: Supplementary Table 1
Supplementary Tables 1. Aging-related genes.
ID	Symbol	Name	Gene id
1	GHR	growth hormone receptor	2690
2	GHRH	growth hormone releasing hormone	2691
3	SHC1	SHC (Src homology 2 domain containing) transforming protein 1	6464
4	POU1F1	POU class 1 homeobox 1	5449
5	PROP1	PROP paired-like homeobox 1	5626
6	TP53	tumor protein p53	7157
7	TERC	telomerase RNA component	7012
8	TERT	telomerase reverse transcriptase	7015
9	ATM	ATM serine/threonine kinase	472
10	PLAU	plasminogen activator, urokinase	5328
11	ERCC2	excision repair cross-complementation group 2	2068
12	ERCC8	excision repair cross-complementation group 8	1161
13	WRN	Werner syndrome, RecQ helicase-like	7486
14	LMNA	lamin A/C	4000
15	IGF1R	insulin-like growth factor 1 receptor	3480
16	TXN	thioredoxin	7295
17	KL	klotho	9365
18	E2F1	E2F transcription factor 1	1869
19	PTPN11	protein tyrosine phosphatase, non-receptor type 11	5781
20	NFKB2	nuclear factor of kappa light polypeptide gene enhancer in B-cells 2 (p49/p100)	4791
21	STAT5B	signal transducer and activator of transcription 5B	6777
22	STAT3	signal transducer and activator of transcription 3 (acute-phase response factor)	6774
23	STAT5A	signal transducer and activator of transcription 5A	6776
24	NRG1	neuregulin 1	3084
25	HDAC3	histone deacetylase 3	8841
26	GH1	growth hormone 1	2688
27	IL7R	interleukin 7 receptor	3575
28	IGF1	insulin-like growth factor 1 (somatomedin C)	3479
29	IGF2	insulin-like growth factor 2	3481
30	INS	insulin	3630
31	NGF	nerve growth factor (beta polypeptide)	4803
32	IRS1	insulin receptor substrate 1	3667
33	PTPN1	protein tyrosine phosphatase, non-receptor type 1	5770
34	IRS2	insulin receptor substrate 2	8660
35	AKT1	v-akt murine thymoma viral oncogene homolog 1	207
36	PIK3CB	phosphatidylinositol-4,5-bisphosphate 3-kinase, catalytic subunit beta	5291
37	NGFR	nerve growth factor receptor	4804
38	HRAS	Harvey rat sarcoma viral oncogene homolog	3265
39	MYC	v-myc avian myelocytomatosis viral oncogene homolog	4609
40	EGFR	epidermal growth factor receptor	1956
41	ERBB2	erb-b2 receptor tyrosine kinase 2	2064
42	INSR	insulin receptor	3643
43	NCOR1	nuclear receptor corepressor 1	9611
44	NBN	nibrin	4683
45	JUND	jun D proto-oncogene	3727
46	IL2	interleukin 2	3558
47	PDGFB	platelet-derived growth factor beta polypeptide	5155
48	EGF	epidermal growth factor	1950
49	IL2RG	interleukin 2 receptor, gamma	3561
50	FOS	FBJ murine osteosarcoma viral oncogene homolog	2353
51	PDGFRB	platelet-derived growth factor receptor, beta polypeptide	5159
52	EPOR	Erythropoietin receptor	2057
53	SST	somatostatin	6750
54	PRKCD	protein kinase C, delta	5580
55	PPARA	peroxisome proliferator-activated receptor alpha	5465
56	RET	ret proto-oncogene	5979
57	PLCG2	phospholipase C, gamma 2 (phosphatidylinositol-specific)	5336
58	PEX5	peroxisomal biogenesis factor 5	5830
59	TCF3	transcription factor 3	6929
60	PARP1	poly (ADP-ribose) polymerase 1	142
61	BRCA1	breast cancer 1, early onset	672
62	PIN1	peptidylprolyl cis/trans isomerase, NIMA-interacting 1	5300
63	PTEN	phosphatase and tensin homolog	5728
64	CREBBP	CREB binding protein	1387
65	HIF1A	hypoxia inducible factor 1, alpha subunit (basic helix-loop-helix transcription factor)	3091
66	UBB	ubiquitin B	7314
67	RPA1	replication protein A1, 70kDa	6117
68	BLM	Bloom syndrome, RecQ helicase-like	641
69	BCL2	B-cell CLL/lymphoma 2	596
70	S100B	S100 calcium binding protein B	6285
71	VCP	valosin containing protein	7415
72	POLG	polymerase (DNA directed), gamma	5428
73	IGFBP3	insulin-like growth factor binding protein 3	3486
74	HSP90AA1	heat shock protein 90kDa alpha (cytosolic), class A member 1	3320
75	NR3C1	nuclear receptor subfamily 3, group C, member 1 (glucocorticoid receptor)	2908
76	EGR1	early growth response 1	1958
77	VEGFA	vascular endothelial growth factor A	7422
78	ABL1	ABL proto-oncogene 1, non-receptor tyrosine kinase	25
79	BRCA2	breast cancer 2, early onset	675
80	TOP2A	topoisomerase (DNA) II alpha	7153
81	TOP2B	topoisomerase (DNA) II beta	7155
82	NFKB1	nuclear factor of kappa light polypeptide gene enhancer in B-cells 1	4790
83	TOP1	topoisomerase (DNA) I	7150
84	RAD51	RAD51 recombinase	5888
85	UBE2I	ubiquitin-conjugating enzyme E2I	7329
86	TNF	tumor necrosis factor	7124
87	PDPK1	3-phosphoinositide dependent protein kinase 1	5170
88	CEBPA	CCAAT/enhancer binding protein (C/EBP), alpha	1050
89	CEBPB	CCAAT/enhancer binding protein (C/EBP), beta	1051
90	MXI1	MAX interactor 1, dimerization protein	4601
91	TGFB1	transforming growth factor, beta 1	7040
92	ERCC6	excision repair cross-complementation group 6	2074
93	STK11	serine/threonine kinase 11	6794
94	EP300	E1A binding protein p300	2033
95	APTX	aprataxin	54840
96	PML	promyelocytic leukemia	5371
97	GSK3B	glycogen synthase kinase 3 beta	2932
98	HTT	huntingtin	3064
99	PRKCA	protein kinase C, alpha	5578
100	SSTR3	somatostatin receptor 3	6753
101	HELLS	helicase, lymphoid-specific	3070
102	APOC3	apolipoprotein C-III	345
103	EEF2	eukaryotic translation elongation factor 2	1938
104	ERCC3	excision repair cross-complementation group 3	2071
105	TERF1	telomeric repeat binding factor (NIMA-interacting) 1	7013
106	PRKDC	protein kinase, DNA-activated, catalytic polypeptide	5591
107	CAT	catalase	847
108	ERCC5	excision repair cross-complementation group 5	2073
109	AR	androgen receptor	367
110	GTF2H2	general transcription factor IIH, polypeptide 2, 44kDa	2966
111	XRCC5	X-ray repair complementing defective repair in Chinese hamster cells 5 (double-strand-break rejoining)	7520
112	PCNA	proliferating cell nuclear antigen	5111
113	FEN1	flap structure-specific endonuclease 1	2237
114	FAS	Fas cell surface death receptor	355
115	TERF2	telomeric repeat binding factor 2	7014
116	XRCC6	X-ray repair complementing defective repair in Chinese hamster cells 6	2547
117	POLD1	polymerase (DNA directed), delta 1, catalytic subunit	5424
118	BAX	BCL2-associated X protein	581
119	RB1	retinoblastoma 1	5925
120	EMD	emerin	2010
121	GRB2	growth factor receptor-bound protein 2	2885
122	FOXO3	forkhead box O3	2309
123	FOXO1	forkhead box O1	2308
124	HSF1	heat shock transcription factor 1	3297
125	XPA	xeroderma pigmentosum, complementation group A	7507
126	MSRA	methionine sulfoxide reductase A	4482
127	RECQL4	RecQ helicase-like 4	9401
128	SOD2	superoxide dismutase 2, mitochondrial	6648
129	SOD1	superoxide dismutase 1, soluble	6647
130	FOXM1	forkhead box M1	2305
131	COQ7	coenzyme Q7 homolog, ubiquinone (yeast)	10229
132	CACNA1A	calcium channel, voltage-dependent, P/Q type, alpha 1A subunit	773
133	LRP2	low density lipoprotein receptor-related protein 2	4036
134	AIFM1	apoptosis-inducing factor, mitochondrion-associated, 1	9131
135	UCHL1	ubiquitin carboxyl-terminal esterase L1 (ubiquitin thiolesterase)	7345
136	APP	amyloid beta (A4) precursor protein	351
137	APOE	apolipoprotein E	348
138	A2M	alpha-2-macroglobulin	2
139	SNCG	synuclein, gamma (breast cancer-specific protein 1)	6623
140	PRDX1	peroxiredoxin 1	5052
141	PON1	paraoxonase 1	5444
142	RELA	v-rel avian reticuloendotheliosis viral oncogene homolog A	5970
143	IL6	interleukin 6	3569
144	RGN	regucalcin	9104
145	ATP5O	ATP synthase, H+ transporting, mitochondrial F1 complex, O subunit	539
146	RAD52	RAD52 homolog, DNA repair protein	5893
147	TOP3B	topoisomerase (DNA) III beta	8940
148	ERCC1	excision repair cross-complementation group 1	2067
149	SIRT1	sirtuin 1	23411
150	HDAC1	histone deacetylase 1	3065
151	HSPA9	heat shock 70kDa protein 9 (mortalin)	3313
152	GPX1	glutathione peroxidase 1	2876
153	GSR	glutathione reductase	2936
154	GSS	glutathione synthetase	2937
155	GSTA4	glutathione S-transferase alpha 4	2941
156	GSTP1	glutathione S-transferase pi 1	2950
157	MT-CO1	mitochondrially encoded cytochrome c oxidase I	4512
158	HSPD1	heat shock 60kDa protein 1 (chaperonin)	3329
159	HSPA1A	heat shock 70kDa protein 1A	3303
160	HSPA1B	heat shock 70kDa protein 1B	3304
161	PCMT1	protein-L-isoaspartate (D-aspartate) O-methyltransferase	5110
162	MAPK8	mitogen-activated protein kinase 8	5599
163	YWHAZ	tyrosine 3-monooxygenase/tryptophan 5-monooxygenase activation protein, zeta	7534
164	PTK2B	protein tyrosine kinase 2 beta	2185
165	PTK2	protein tyrosine kinase 2	5747
166	IL7	interleukin 7	3574
167	MAPK14	mitogen-activated protein kinase 14	1432
168	FGFR1	fibroblast growth factor receptor 1	2260
169	SP1	Sp1 transcription factor	6667
170	FLT1	fms-related tyrosine kinase 1	2321
171	JUN	jun proto-oncogene	3725
172	MED1	mediator complex subunit 1	5469
173	MAPK9	mitogen-activated protein kinase 9	5601
174	MAPK3	mitogen-activated protein kinase 3	5595
175	HMGB1	high mobility group box 1	3146
176	CCNA2	cyclin A2	890
177	HMGB2	high mobility group box 2	3148
178	MAP3K5	mitogen-activated protein kinase kinase kinase 5	4217
179	TAF1	TAF1 RNA polymerase II, TATA box binding protein (TBP)-associated factor, 250kDa	6872
180	LMNB1	lamin B1	4001
181	SDHC	succinate dehydrogenase complex, subunit C, integral membrane protein, 15kDa	6391
182	FOXO4	forkhead box O4	4303
183	HESX1	HESX homeobox 1	8820
184	PIK3R1	phosphoinositide-3-kinase, regulatory subunit 1 (alpha)	5295
185	BSCL2	Berardinelli-Seip congenital lipodystrophy 2 (seipin)	26580
186	AGPAT2	1-acylglycerol-3-phosphate O-acyltransferase 2	10555
187	BMI1	BMI1 proto-oncogene, polycomb ring finger	648
188	EEF1A1	eukaryotic translation elongation factor 1 alpha 1	1915
189	TFAP2A	transcription factor AP-2 alpha (activating enhancer binding protein 2 alpha)	7020
190	BDNF	brain-derived neurotrophic factor	627
191	CREB1	cAMP responsive element binding protein 1	1385
192	ATF2	activating transcription factor 2	1386
193	TBP	TATA box binding protein	6908
194	APEX1	APEX nuclease (multifunctional DNA repair enzyme) 1	328
195	HBP1	HMG-box transcription factor 1	26959
196	BUB1B	BUB1 mitotic checkpoint serine/threonine kinase B	701
197	PTGS2	prostaglandin-endoperoxide synthase 2 (prostaglandin G/H synthase and cyclooxygenase)	5743
198	HSPA8	heat shock 70kDa protein 8	3312
199	SIN3A	SIN3 transcription regulator family member A	25942
200	CDK1	cyclin-dependent kinase 1	983
201	TFDP1	transcription factor Dp-1	7027
202	DDIT3	DNA-damage-inducible transcript 3	1649
203	POLA1	polymerase (DNA directed), alpha 1, catalytic subunit	5422
204	MAPT	microtubule-associated protein tau	4137
205	CTGF	connective tissue growth factor	1490
206	HDAC2	histone deacetylase 2	3066
207	MAX	MYC associated factor X	4149
208	MXD1	MAX dimerization protein 1	4084
209	MDM2	MDM2 proto-oncogene, E3 ubiquitin protein ligase	4193
210	SUMO1	small ubiquitin-like modifier 1	7341
211	H2AFX	H2A histone family, member X	3014
212	HOXB7	homeobox B7	3217
213	HOXC4	homeobox C4	3221
214	JAK2	Janus kinase 2	3717
215	ESR1	estrogen receptor 1	2099
216	LEP	leptin	3952
217	LEPR	leptin receptor	3953
218	NFKBIA	nuclear factor of kappa light polypeptide gene enhancer in B-cells inhibitor, alpha	4792
219	CLU	clusterin	1191
220	MTOR	mechanistic target of rapamycin (serine/threonine kinase)	2475
221	GHRHR	growth hormone releasing hormone receptor	2692
222	CTNNB1	catenin (cadherin-associated protein), beta 1, 88kDa	1499
223	PSEN1	presenilin 1	5663
224	DLL3	delta-like 3 (Drosophila)	10683
225	CDKN2A	cyclin-dependent kinase inhibitor 2A	1029
226	PPP1CA	protein phosphatase 1, catalytic subunit, alpha isozyme	5499
227	DBN1	drebrin 1	1627
228	NOG	noggin	9241
229	ELN	elastin	2006
230	ATR	ATR serine/threonine kinase	545
231	UCP3	uncoupling protein 3 (mitochondrial, proton carrier)	7352
232	ZMPSTE24	zinc metallopeptidase STE24	10269
233	TP63	tumor protein p63	8626
234	UCP2	uncoupling protein 2 (mitochondrial, proton carrier)	7351
235	POLB	polymerase (DNA directed), beta	5423
236	GCLC	glutamate-cysteine ligase, catalytic subunit	2729
237	GCLM	glutamate-cysteine ligase, modifier subunit	2730
238	SIRT6	sirtuin 6	51548
239	BUB3	BUB3 mitotic checkpoint protein	9184
240	RAE1	ribonucleic acid export 1	8480
241	PMCH	pro-melanin-concentrating hormone	5367
242	MLH1	mutL homolog 1	4292
243	CSNK1E	casein kinase 1, epsilon	1454
244	STUB1	STIP1 homology and U-box containing protein 1, E3 ubiquitin protein ligase	10273
245	PPM1D	protein phosphatase, Mg2+/Mn2+ dependent, 1D	8493
246	CHEK2	checkpoint kinase 2	11200
247	PCK1	phosphoenolpyruvate carboxykinase 1 (soluble)	5105
248	ARHGAP1	Rho GTPase activating protein 1	392
249	CDC42	cell division cycle 42	998
250	ARNTL	aryl hydrocarbon receptor nuclear translocator-like	406
251	CLOCK	clock circadian regulator	9575
252	HIC1	hypermethylated in cancer 1	3090
253	PAPPA	pregnancy-associated plasma protein A, pappalysin 1	5069
254	ADCY5	adenylate cyclase 5	111
255	PPARGC1A	peroxisome proliferator-activated receptor gamma, coactivator 1 alpha	10891
256	GPX4	glutathione peroxidase 4	2879
257	UCP1	uncoupling protein 1 (mitochondrial, proton carrier)	7350
258	FGF23	fibroblast growth factor 23	8074
259	EFEMP1	EGF containing fibulin-like extracellular matrix protein 1	2202
260	ERCC4	excision repair cross-complementation group 4	2072
261	CETP	cholesteryl ester transfer protein, plasma	1071
262	PPARG	peroxisome proliferator-activated receptor gamma	5468
263	AGTR1	angiotensin II receptor, type 1	185
264	CISD2	CDGSH iron sulfur domain 2	493856
265	EEF1E1	eukaryotic translation elongation factor 1 epsilon 1	9521
266	EPS8	epidermal growth factor receptor pathway substrate 8	2059
267	KCNA3	potassium channel, voltage gated shaker related subfamily A, member 3	3738
268	SIRT7	sirtuin 7	51547
269	SLC13A1	solute carrier family 13 (sodium/sulfate symporter), member 1	6561
270	SOCS2	suppressor of cytokine signaling 2	8835
271	TPP2	tripeptidyl peptidase II	7174
272	TP53BP1	tumor protein p53 binding protein 1	7158
273	SIRT3	sirtuin 3	23410
274	NCOR2	nuclear receptor corepressor 2	9612
275	SUN1	Sad1 and UNC84 domain containing 1	23353
276	BAK1	BCL2-antagonist/killer 1	578
277	IGFBP2	insulin-like growth factor binding protein 2, 36kDa	3485
278	PYCR1	pyrroline-5-carboxylate reductase 1	5831
279	TP73	tumor protein p73	7161
280	CNR1	cannabinoid receptor 1 (brain)	1268
281	NFE2L2	nuclear factor, erythroid 2-like 2	4780
282	CDKN1A	cyclin-dependent kinase inhibitor 1A (p21, Cip1)	1026
283	PDGFRA	platelet-derived growth factor receptor, alpha polypeptide	5156
284	PIK3CA	phosphatidylinositol-4,5-bisphosphate 3-kinase, catalytic subunit alpha	5290
285	C1QA	complement component 1, q subcomponent, A chain	712
286	CDKN2B	cyclin-dependent kinase inhibitor 2B (p15, inhibits CDK4)	1030
287	EIF5A2	eukaryotic translation initiation factor 5A2	56648
288	MIF	macrophage migration inhibitory factor (glycosylation-inhibiting factor)	4282
289	DGAT1	diacylglycerol O-acyltransferase 1	8694
290	MT1E	metallothionein 1E	4493
291	FGF21	fibroblast growth factor 21	26291
292	HTRA2	HtrA serine peptidase 2	27429
293	GSK3A	glycogen synthase kinase 3 alpha	2931
294	NUDT1	nudix (nucleoside diphosphate linked moiety X)-type motif 1	4521
295	IKBKB	inhibitor of kappa light polypeptide gene enhancer in B-cells, kinase beta	3551
296	SQSTM1	sequestosome 1	8878
297	CDK7	cyclin-dependent kinase 7	1022
298	GRN	granulin	2896
299	SERPINE1	serpin peptidase inhibitor, clade E (nexin, plasminogen activator inhibitor type 1), member 1	5054
300	SPRTN	SprT-like N-terminal domain	83932
301	RICTOR	RPTOR independent companion of MTOR, complex 2	253260
302	CTF1	cardiotrophin 1	1489
303	TRAP1	TNF receptor-associated protein 1	10131
304	TRPV1	transient receptor potential cation channel subfamily V member 1	7442
305	NFE2L1	nuclear factor, erythroid 2-like 1	4779
306	IFNB1	Interferon beta	3456
307	GDF11	growth differentiation factor 11	10220

## Sheet: Supplementary Table 2
Supplementary Table 2. 33 aging-related lncRNAs expression in TCGA.
id	futime	fustat	LINC00339	SNHG12	LINC00320	ASB16-AS1	LINC00265	MIR210HG	LINC00641	PAXIP1-AS2	SNAI3-AS1	SNHG9	STAG3L5P-PVRIG2P-PILRB	LBX2-AS1	LINC00900	EPB41L4A-AS1	SOCS2-AS1	OIP5-AS1	LINC01023	SNHG16	LINC00599	LINC00665	RFPL1S	LINC00237	SLC25A21-AS1	CD27-AS1	PTOV1-AS1	PCED1B-AS1	LINC00928	NNT-AS1	HAR1A	TTC28-AS1	LINC00092	GDNF-AS1	WDFY3-AS2
TCGA-06-0129	2.80548	1	9.40456	6.03136	2.07778	9.03785	7.66436	0.506278	6.94838	1.61809	0.470279	6.97332	1.34345	0.581754	0.594858	6.01279	0.136859	12.1878	3.85017	4.28208	3.17931	5.72172	0.639478	7.05226	2.45267	11.6035	6.25281	3.07045	7.57617	8.10707	0.099107	3.40866	0.630898	1.32768	1.37116
TCGA-06-5416	0.558904	0	11.6785	5.09372	0.327609	4.43803	1.65053	5.38751	3.41527	2.14497	0.472559	11.5774	0.307562	2.55846	0.419521	7.8014	1.16436	5.59462	11.865	4.32079	2.63964	5.51796	1.21968	8.15835	0.742291	10.0952	2.55981	0.975104	0.725663	9.13044	0.876901	2.35285	1.65154	0.355981	0.496291
TCGA-32-1970	1.28219	1	11.0475	3.41951	1.73656	5.28095	4.64733	1.37001	2.60261	6.66842	0.826488	8.69439	1.76431	0.843212	1.30803	4.73571	4.5337	9.06085	4.55819	2.39941	0.915489	9.13366	0.530415	0.952539	0.0652381	8.45129	2.36921	2.09062	0.422052	6.65424	0.422395	1.77908	4.27284	0.175985	2.33378
TCGA-19-1787	1.05479	1	12.273	6.17326	1.21345	4.28724	2.63201	1.10949	2.34903	1.45798	0.5977	6.73539	0.808369	0.645088	2.21686	4.98847	1.955	9.10652	4.64682	2.19645	0.0274681	3.37885	0.196261	0.763935	0.856194	8.56529	4.85193	2.33316	0	5.8099	0.0402438	0.859395	3.67034	0.122528	1.337
TCGA-06-0184	3.36438	0	11.3076	3.93571	3.63553	2.15334	0.969991	3.82307	2.15496	5.18921	0.634035	40.6072	1.32733	1.64257	1.21579	2.74501	0.295673	8.41268	6.3599	2.07213	0.0970974	4.77757	0.274457	1.32267	0.139153	13.6685	3.07124	8.45469	0.051442	4.71986	0.0609678	1.06419	2.49618	0.169126	1.65863
TCGA-41-5651	0.961644	0	7.77065	2.82221	3.41776	4.5887	3.20263	4.36222	10.5257	0.73249	0.250644	14.0173	0.706725	0.475141	0.493434	8.38733	0.194613	7.56142	2.78208	6.32028	3.68689	7.70043	0.710551	13.8827	0.167262	9.81194	1.57847	1.20091	0.46613	6.28276	0.144688	2.59493	2.03964	1.03056	0.96976
TCGA-02-2485	1.28767	0	6.58591	3.98975	0.967356	4.28671	2.45897	0.713054	6.80905	2.16888	0.353843	13.7089	1.42824	1.0894	1.04175	4.55577	6.37205	9.80281	6.76443	3.19733	2.42652	9.80604	0.257146	1.90778	0.011028	5.13187	4.87159	0.658772	0.499414	5.91716	0.169112	1.51613	3.0824	0	1.23141
TCGA-06-0138	2.01918	1	18.5675	10.3759	2.62772	4.72704	3.2139	4.74469	4.78814	2.20103	0.749154	29.7697	0.82698	1.37958	1.42192	6.90879	2.66387	9.43103	8.77254	3.67672	3.28943	5.43273	1.17482	5.93295	0.186788	7.2472	3.20035	8.32697	0.29347	6.83103	0.122758	1.96239	4.90914	0.287929	3.32307
TCGA-06-0747	0.224658	1	9.32064	7.31409	0.112249	5.66058	5.14655	2.54601	3.34662	4.13693	0.673558	10.3525	2.50471	0.912385	0.383308	5.2568	1.98332	9.2743	3.89073	2.71866	0.964515	3.56983	0.196193	0.891773	0.0484441	14.7502	3.50383	1.47104	0.676953	3.83024	0.108955	1.38026	4.94729	0.237238	1.07586
TCGA-06-5414	0.747945	0	9.1492	3.61815	0.222367	1.94051	2.52277	1.97505	2.63552	3.69122	0.359243	13.3551	0.722197	2.23274	0.788268	3.34464	9.36638	8.98455	6.32419	3.30077	0.0375002	6.78711	0.074199	0.466842	0.0268712	6.06277	3.1449	4.77096	0.544701	7.00337	0.0274709	1.82243	3.62455	0.00743461	1.68083
TCGA-76-4925	0.4	1	9.26592	4.60183	0.244809	3.75809	3.1229	12.0163	6.42233	3.42755	0.698546	6.19799	0.840261	1.77114	0.984356	6.70008	1.07122	5.07244	4.90538	4.80896	0.0750636	3.86827	0.0687607	0.536823	0.0179293	11.3267	2.74128	1.66789	1.27591	7.20062	0.412411	1.12085	2.29623	0.0483657	0.964861
TCGA-06-0221	1.65205	1	6.26528	3.02887	3.80825	4.2495	4.93267	0.533879	15.5954	1.75753	1.04217	4.53865	0.743515	0.389189	0.633441	5.30903	0.247968	22.7359	2.84205	3.73114	7.44635	4.34888	6.02852	2.79187	0.889946	5.6605	4.14894	0.765077	5.63621	5.93031	1.3288	1.35995	1.19194	0.748398	1.51094
TCGA-19-4065	0.586301	0	14.888	9.09865	0.946629	3.5586	1.44099	8.87099	5.06806	3.02286	0.999363	10.8165	0.644656	1.75882	2.23156	4.45516	0.48552	8.40563	3.48298	4.68802	2.47026	2.77464	1.42578	1.42496	0.0448679	8.27928	3.05881	8.05826	0.0847928	3.47657	0.695411	1.00448	2.15589	0.127669	1.35438
TCGA-06-0178	4.49863	0	12.8479	6.6902	2.151	4.55628	1.25857	0.898698	1.81172	0.692921	0.608693	44.7433	0.289619	0.602953	0.590575	6.45562	0.783699	8.00553	9.79881	6.33198	1.51297	7.22767	0.38472	11.9644	0.979641	27.916	2.69667	8.65607	1.11543	4.629	0.560842	1.46354	0.141676	0.672185	1.23974
TCGA-02-0055	0.208219	1	12.4717	6.65478	0.19911	2.2582	0.607964	4.18852	2.19076	1.69103	0.467886	14.3592	0.529089	2.98874	0.649018	5.99681	0.590023	8.60256	6.17756	7.13838	0.529111	2.01628	0.375816	0.606407	0.0218735	4.61438	2.11775	5.52599	0.0141509	1.82282	0.916828	1.04064	0.657002	0.0317723	0.787009
TCGA-02-2483	1.27671	0	9.82538	3.68832	0.201398	2.74859	1.50923	1.67045	4.89963	0.491238	0.51687	11.8975	0.269815	0.799891	0.286885	5.36584	0.780418	5.24967	5.24097	5.29555	1.27705	6.27629	1.41872	5.81873	1.06111	7.8687	3.45367	3.17417	0.302301	4.43202	1.52269	1.39376	0.243669	0.820146	0.860561
TCGA-06-2563	0.709589	0	7.66953	3.29204	0.383651	3.44909	5.06355	0.703009	3.96287	4.97443	0.401685	18.1232	1.2878	1.22141	1.1275	3.22694	11.391	13.0315	4.14158	4.58892	1.0678	6.76753	0.506513	0.213169	0.113076	7.07972	2.72271	2.73706	0.687641	6.33828	0.312118	1.56462	0.74532	0.023464	1.91849
TCGA-06-0139	0.991781	1	18.9427	10.3773	2.79602	3.61457	1.07944	2.60768	1.26824	2.23611	0.56371	18.9854	0.567553	3.26278	2.3517	3.55284	0.685337	6.98098	7.19792	4.55686	0.198727	1.88853	0.750668	1.03361	0.310691	8.19284	1.93781	24.0452	0.100499	2.64591	0.317625	0.787412	0.777672	0.161176	0.807082
TCGA-28-5209	1.21096	0	6.07558	2.14979	0.218414	3.08113	1.90796	4.04357	2.74467	4.12964	0.459275	9.07967	0.394089	0.965664	0.540638	3.81894	0.522441	10.8517	4.2706	3.86891	0.0409262	8.25342	0.0689812	0.303528	0.0293262	5.16652	4.23323	1.95257	0.784189	5.21075	0.00999356	1.47083	1.09291	0.0202846	1.02787
TCGA-DU-7309	0.230137	0	4.16414	1.31694	2.38953	1.88106	1.66788	0.346214	23.1733	0.83388	1.4908	2.28813	0.206838	0.245978	0.389531	6.93555	0.352172	21.8767	1.01685	1.53738	1.43034	3.44391	7.07418	1.70886	1.35377	4.83345	3.01615	1.04402	1.43483	6.45562	2.8563	1.13213	0.877173	1.03999	5.50563
TCGA-QH-A6X5	1.36164	0	2.76349	2.08215	12.6126	3.3374	1.94306	1.02417	10.5104	1.57844	1.53476	6.30811	0.585981	0.277972	0.733475	12.676	0.392604	10.4158	3.66526	2.27995	2.98959	1.81698	1.22638	3.74184	4.17371	14.2014	1.83455	1.01429	0.429873	7.89009	2.08036	2.26199	1.11746	0.758351	6.09929
TCGA-CS-6186	1.47397	1	3.90158	2.28928	1.18972	4.22864	5.33556	1.65015	4.21956	5.23875	0.68058	9.31089	1.60998	0.499158	0.575423	5.18228	0.464661	11.2678	8.18792	1.52998	0.0171484	7.83359	0.229972	0.0817588	0.0491516	5.98153	5.27626	1.67451	0.906248	8.44714	0	1.46205	2.48107	0	2.97287
TCGA-DU-7294	7.86027	0	3.3755	1.10346	5.69714	2.04305	2.08593	0.748785	15.2625	1.10557	1.30242	2.61424	0.352673	0.180311	0.0919842	19.7071	0.0861629	16.5416	0.682301	2.56668	3.63034	2.25908	1.85258	8.90691	3.57247	9.26752	1.48263	0.795004	2.14797	12.1044	1.0316	2.56898	0.380223	2.23238	3.3722
TCGA-FG-A70Z	0.89863	0	4.57571	2.75313	1.19635	2.77365	1.62308	0.734938	6.32178	2.41829	1.36986	30.0656	0.342126	0.7669	1.01569	6.8014	0.495336	9.32017	14.6626	1.65082	1.20384	4.66296	1.35761	3.64923	0.135784	7.44271	2.7532	3.94128	0.155018	5.4627	0.816551	1.29554	5.65785	0.212148	1.86303
TCGA-E1-A7YS	1.27671	1	3.07891	3.92077	13.8915	5.06277	3.62811	3.36408	9.4047	1.19231	0.634619	7.41819	1.49605	0.293362	0.0366505	15.5819	0.178521	8.76482	0.72114	2.20544	16.9524	1.6883	2.88574	13.8734	3.29561	12.4081	2.09462	0.32201	2.02046	14.9776	1.02096	2.74011	0.106048	4.65703	3.44959
TCGA-DU-5871	1.57808	0	4.72734	1.88696	1.13847	2.27154	1.32706	1.49242	21.6254	1.16473	0.632546	7.65064	0.320963	0.619383	0.205697	8.49695	0.192679	15.8544	2.21103	2.53528	0.774293	3.36495	0.760809	4.27549	2.55618	8.4977	3.92249	2.15072	1.49437	8.26642	0.737953	2.65069	0.623524	0.807089	5.47624
TCGA-DB-A75L	0.936986	0	6.77268	5.9011	6.05025	3.27787	3.67767	1.24734	12.7482	1.08693	1.54797	5.99559	0.939694	0.579538	0.242231	9.44357	0.698158	11.275	4.72544	2.34519	3.44401	2.81179	2.24032	2.36474	2.91711	19.2556	2.61156	2.34939	3.3444	9.22068	0.839926	2.97497	0.531448	1.23746	5.86407
TCGA-R8-A6ML	7.83562	0	3.00304	2.18278	4.17953	3.65932	2.74029	0.573525	8.69092	1.58337	1.27182	6.58329	0.749601	0.263484	0.0628429	15.8234	0.492729	9.73575	1.67921	2.73082	7.46681	1.8994	1.20199	6.74208	3.96959	20.7322	1.5519	0.161443	1.54421	9.96594	1.29968	3.48538	0.339138	3.08669	4.1337
TCGA-FG-5962	2.15616	0	3.80935	1.04121	7.66505	2.0707	1.46646	0.80926	21.9413	1.57135	1.89433	7.22682	0.523442	0.21631	0.36888	9.17577	0.342582	24.9079	2.58481	2.03452	9.20254	2.60003	10.8259	5.02322	3.95183	9.08805	1.85908	1.01083	0.970093	9.84248	4.63884	2.02935	1.34234	0.820031	4.83517
TCGA-DU-7304	1.94247	1	6.00161	5.14287	2.59919	4.00099	1.02436	0.987053	10.0547	0.803926	1.48266	58.1001	1.03481	0.534147	0.286428	16.0203	0.371631	12.2852	15.797	2.02123	1.44301	3.80568	1.88411	1.63437	3.08052	7.11555	2.53217	1.39227	0.628613	7.4641	0.780752	1.63699	0.792545	1.27209	4.16494
TCGA-DU-6407	7.87671	1	10.2336	5.25142	3.28046	1.7135	2.4067	0.75107	10.8948	0.726125	0.826498	14.6063	0.492096	0.573081	0.207051	9.18521	0.389925	9.17164	4.63509	3.57667	1.30834	4.59964	0.433784	5.63173	1.4097	14.022	4.2351	2.27637	1.15207	6.77639	0.217324	2.0629	0.414585	1.3522	3.8479
TCGA-DU-A5TT	2.03562	0	7.80697	5.27767	7.81747	3.46708	4.4627	0.7096	5.4721	4.90503	1.13663	15.7994	1.9874	0.385741	1.86772	6.61968	4.85549	6.97452	4.90173	2.15376	1.47431	3.06588	0.659713	0.418131	0.774494	10.6111	4.40375	1.82626	0.290082	5.13415	0.520907	1.662	8.47706	0.0549806	1.81434
TCGA-HT-A61A	0.531507	0	5.59368	1.98333	9.52368	1.90671	2.33328	0.78287	19.8788	1.20064	3.31796	3.79621	0.547855	0.162214	1.01519	10.1472	1.09628	19.6996	2.08376	1.07967	9.50676	2.3238	15.7309	1.18124	1.41661	10.1337	2.96089	0.731157	1.19353	4.8165	3.61495	1.62887	2.54714	0.6107	3.61053
TCGA-P5-A5EW	0.558904	0	3.53265	1.80442	2.72702	2.70083	1.8465	0.61341	17.7839	0.976597	0.523851	5.02998	0.183963	0.346139	0.0716941	7.7828	0.11939	14.1597	2.87357	1.86573	1.0694	2.4859	0.299684	1.72871	2.881	8.26993	3.83906	1.98916	3.1149	10.0598	0.605197	2.37946	0.156408	1.19565	7.85577
TCGA-DU-5870	15.1945	0	3.37206	4.04462	4.14123	2.7912	2.26755	0.664978	10.5199	1.84688	1.50258	9.63642	0.576216	0.523961	0.142244	13.4125	0.629867	11.1039	2.32926	2.5611	8.20671	2.74414	5.04738	7.43897	3.52566	16.8269	1.65951	0.87392	1.36768	10.8784	1.80618	2.47336	0.24226	1.87302	5.07103
TCGA-CS-4943	1.51233	0	7.73156	2.38336	1.4091	2.91324	1.51187	0.312164	13.1738	0.53491	0.403383	4.63088	0.226896	0.627308	0.085925	8.95869	0.160974	14.2493	5.41882	3.01384	0.415094	5.31294	0.248656	6.26397	2.93074	14.5824	2.06112	2.14458	2.96584	11.8801	0.836913	1.01772	0.143437	1.02264	1.64287
TCGA-HT-7607	0.263014	1	3.7729	0.839418	4.55776	1.38158	0.914786	0.43482	27.3431	2.32054	1.72075	2.77435	0.291542	0.291986	0.865699	5.64987	0.338366	27.6815	1.22544	1.24832	3.92207	2.1311	12.2192	1.18903	1.99789	6.30903	2.25288	0.676793	0.369289	7.30569	2.8705	1.25805	2.40707	0.11845	4.30672
TCGA-VV-A86M	1.33425	0	7.1983	8.60677	0.679157	3.4379	3.36798	4.9122	9.93266	0.368964	0.74387	7.62587	0.918283	0.680643	0.0786168	18.6239	0.743428	10.3628	4.84933	3.46896	1.89596	4.64206	0.145105	7.69737	3.81142	15.2059	5.35523	3.18529	2.69974	6.56069	0.867464	3.78023	0.0812419	3.75242	2.46794
TCGA-S9-A7QW	1.25479	0	5.83888	6.1097	5.07726	3.18796	1.77288	0.937596	8.96989	0.745534	1.69961	15.3135	1.30126	0.157618	0.0603058	16.6989	0.0860788	10.6464	4.28489	2.17091	5.92664	4.05692	0.618742	8.15276	2.29413	20.8909	2.25667	0.929551	2.42989	8.52393	2.77076	3.64177	0.551972	1.90419	6.21885
TCGA-HW-A5KM	1.72603	0	4.45867	2.01685	1.85916	2.64873	1.49472	0.712893	6.84981	1.78985	0.588234	3.63147	0.305714	0.28312	0.0726641	6.21382	0.393267	9.6981	1.58861	2.19358	1.06991	1.9629	0.486799	1.35289	1.39332	8.04339	2.95411	6.6124	0.966089	7.4893	0.204461	1.86624	0.0556225	1.08732	2.85976
TCGA-DH-A7UR	4.52055	0	6.10478	4.29616	2.30865	8.02423	4.4265	3.72032	10.658	1.03975	6.96139	14.5771	0.988185	0.989192	0.269316	20.0178	0.249724	17.189	6.20013	1.9223	6.60175	2.66291	2.01581	3.58693	3.29522	13.3073	2.29969	0.465441	2.1972	8.255	1.00236	4.07007	1.56022	4.59769	1.39832
TCGA-DB-A64V	2.43562	0	5.75014	4.32707	15.357	3.52478	1.47228	0.623978	7.30024	0.905268	0.877314	11.4909	0.549531	0.917676	0.486974	13.0871	0.360059	7.32409	3.79013	1.37126	5.17157	1.65794	1.82683	1.55174	3.09778	13.7119	1.8024	2.55211	0.474485	8.07595	1.31215	2.20721	1.66671	1.09738	4.28639
TCGA-QH-A65R	1.26301	0	4.24552	3.82556	6.05955	3.44499	2.34514	1.58145	12.0897	0.320654	1.66819	3.33081	0.7446	0.302184	0.169887	26.419	0.268762	10.5618	2.02214	3.33886	4.55043	2.31876	1.77318	3.78525	3.74073	20.6937	1.91787	0.250225	2.16593	9.93986	1.23331	2.79757	0.76466	2.01819	4.73681
TCGA-CS-6188	1.9863	0	6.02076	2.82824	2.73617	3.16455	1.80004	0.709231	2.78135	6.48639	0.558295	7.81113	0.601811	0.567731	0.460519	3.77401	1.1054	10.0423	3.50022	1.88037	0.17827	4.87435	0.396481	0.602868	0.115859	6.15306	2.26017	2.20162	0.357472	7.6667	0.100222	1.89097	3.38332	0.0184935	2.14512
TCGA-TQ-A7RO	2.6	0	2.11737	1.82369	4.45154	2.61649	2.92442	0.488303	11.85	0.920359	1.03163	4.26903	0.588087	0.430963	0.161524	9.38106	1.0479	11.7356	2.40324	2.12165	5.25293	1.88865	3.5873	4.12889	2.60075	12.8141	1.62809	0.338879	1.15045	11.6799	0.806728	2.06961	0.500752	1.39762	7.66348
TCGA-TM-A84I	2.33973	0	6.68848	7.6277	0.873816	4.40208	3.73373	0.305158	10.0842	0.495111	0.773376	15.6958	1.49383	0.321974	0.136877	5.68526	0.0928029	13.2367	4.48869	3.90364	0.775112	5.55202	0.799525	6.22007	3.07094	16.9831	5.77388	1.68183	5.05139	9.93688	0.0198074	3.81803	0.185902	3.67468	2.60215
TCGA-QH-A6X4	1.21096	0	3.43205	3.27174	10.6678	4.12237	3.24994	1.23332	9.24795	0.657329	1.81232	5.22683	1.99323	0.443899	0.076908	16.4418	0.0640362	9.80633	4.40364	1.11979	13.0064	2.67113	2.35472	11.368	4.28196	25.3348	2.13457	0.959656	2.23022	9.87317	6.36225	5.1647	0.544978	2.86138	2.5156
TCGA-DU-7301	2.1589	1	5.89708	1.53098	5.04824	1.71006	0.932966	0.41507	15.7051	0.518293	0.363394	2.91403	0.214476	0.485387	0.185291	8.90682	0.479669	11.0467	3.57216	2.78784	0.310567	2.46162	0.151064	3.02617	2.53696	8.91545	1.87572	1.78115	1.60887	11.9105	0.119441	1.61038	0.222811	1.36458	4.92068
TCGA-FG-A4MT	3.18904	0	5.33587	5.33102	4.95832	3.41872	2.95667	1.38161	11.6318	0.500781	1.99542	6.49804	0.582359	0.28443	0.272987	14.9664	0.313921	12.2644	4.56522	2.41146	3.32583	2.31858	2.48762	5.58106	2.02175	10.7719	2.26284	1.21152	1.88217	6.87996	2.41384	2.5096	0.882411	1.75819	2.73568
TCGA-FG-A4MW	1.53151	1	5.33845	3.12189	5.5167	3.26826	4.08747	0.862628	7.37891	2.42991	1.24837	11.4688	1.20448	0.915695	0.43322	4.24725	2.29545	6.41325	6.45765	1.70946	1.13457	5.63464	0.76825	0.270465	0.341454	7.39217	3.16336	0.991529	0.441801	5.8241	0.531923	1.94909	4.0563	0.020244	2.31993
TCGA-HW-7490	1.60274	0	6.39834	2.28501	0.958277	2.047	0.785027	0.351193	16.0441	0.676069	0.668883	5.29277	0.317869	0.71273	0.0874144	9.80441	0.465186	13.8858	3.1159	2.23297	0.332845	4.35425	0.46216	2.08804	4.29308	8.49133	3.53397	1.44114	0.68216	12.1979	0.38499	2.3425	0.329913	0.765811	5.09569
TCGA-S9-A6WL	2.59178	0	3.14888	3.12066	3.91054	3.20875	2.48096	0.916999	15.2293	1.30624	1.49737	5.77532	0.779352	0.396615	0.481256	15.0528	0.471105	13.5595	0.995267	3.09839	9.82223	1.9886	3.38408	3.45387	2.47019	11.4556	1.647	0.654928	1.32014	9.01915	1.69086	2.10686	1.79216	2.48267	2.77159
TCGA-HT-7689	1.24658	0	5.67764	3.15461	7.94347	1.95261	1.8372	0.901584	11.5921	1.08209	0.909564	7.42293	0.423518	0.190173	0.126397	8.06865	0.224333	12.9707	4.39953	2.45687	1.18053	3.76233	0.872147	4.02032	2.167	10.3873	1.91984	2.84551	1.27931	9.8731	0.758107	2.2963	0.962445	0.649707	7.87915
TCGA-DB-5274	6.27123	0	7.09186	3.73488	9.18116	2.94236	0.11827	0.653593	3.84888	0.30605	2.4954	8.84943	0.618693	0.644731	0.218259	50.7629	0.176051	9.00676	7.45571	2.83319	2.98137	1.32417	1.14732	7.25707	3.8747	16.9634	1.96965	2.3059	0.0145738	10.0781	3.82299	3.02292	0.667242	1.31355	1.91454
TCGA-RY-A843	0.172603	0	3.71816	2.69387	4.41653	2.40666	2.07573	0.705098	15.3426	0.712127	1.20405	7.42528	0.386613	0.639006	0.148123	6.17499	0.433065	16.1305	5.33588	1.40636	5.50073	3.61618	2.11077	3.36609	3.41903	14.3511	3.29058	1.05856	0.917133	10.897	1.24468	2.24248	0.619234	1.60237	6.33966
TCGA-S9-A7IX	1.86027	0	4.42891	2.99446	2.60699	3.19998	3.23155	0.766915	8.44172	2.91006	1.93449	12.8106	0.75961	0.949853	1.03995	7.44302	2.68616	10.2267	5.24402	1.67987	2.36704	4.04879	2.64027	1.07901	0.23129	9.43818	3.77142	2.96278	0.350859	5.06056	1.07626	1.25818	3.88614	0.115848	2.09035
TCGA-HT-7882	0.309589	1	9.62433	4.6643	1.73067	1.95725	1.24759	0.940916	2.97579	2.12779	0.590604	5.89838	0.508938	2.25262	0.479866	3.89785	0.495686	5.43704	3.90455	3.38336	0.303504	2.80826	0.18098	0.406356	0.0446876	3.92211	2.48343	6.83494	0.115641	2.7231	0.0822328	1.03798	0.745698	0.0519286	1.35282
TCGA-QH-A6CZ	0.764384	0	3.41074	2.24653	5.19008	3.33649	2.45362	0.673196	16.1307	0.582352	2.43677	7.07225	1.45947	0.162597	0.596433	12.9873	0.133197	21.6921	2.84968	2.34173	5.89879	2.19335	10.0025	6.65119	2.12321	19.9345	1.70649	0.864545	3.21559	12.4395	2.71074	4.37653	0.48165	3.19167	5.0864
TCGA-FG-A87N	1.13151	0	5.46779	4.46252	0.634666	3.12043	3.95596	0.33817	10.1686	1.01345	0.629534	5.72644	0.48105	0.436888	0.0724617	8.18222	0.481302	8.85659	2.5563	7.89284	4.46341	6.29353	3.35685	6.24295	1.94183	9.62304	2.44264	1.47738	2.36471	5.99763	0.667284	1.91543	0.306333	1.18851	1.11097
TCGA-S9-A6WD	5.79178	0	4.03164	2.56896	9.17158	3.04501	1.57389	0.958001	15.0301	1.20728	1.72233	9.79087	0.525095	0.27111	0.0803057	18.4272	0.210148	9.70746	2.92612	2.4507	3.77203	2.21461	2.07512	5.90362	4.88794	14.6884	2.05976	0.695543	0.747653	10.8356	2.60504	2.27272	1.20134	1.78875	7.79501
TCGA-QH-A6CS	1.61096	0	8.07595	1.68738	9.40243	2.59434	1.96234	0.678499	6.98314	2.20169	0.686997	14.9296	0.434175	0.467316	1.00866	4.23219	1.33579	9.42279	3.13666	1.21343	0.115228	4.02564	0.280862	0.238859	0.527717	7.27756	2.71153	3.26362	0.055739	8.07741	0.187171	1.19714	5.51721	0.0357567	7.80002
TCGA-P5-A77W	1.6	0	2.46506	3.97063	5.23058	2.87415	2.93738	0.172025	13.1402	0.643298	0.957814	4.31757	0.688456	0.359228	0.017453	31.8745	0.087192	11.3144	1.33548	6.2797	6.91836	2.52743	0.474866	9.82833	1.66016	11.4127	1.41307	0.462716	3.27802	9.43057	0.990042	3.49395	0.346288	2.97127	2.11071
TCGA-DB-A4XG	6.07945	0	3.34872	1.46457	4.52135	3.35085	2.65195	0.343696	13.0402	0.709321	1.42182	2.34859	0.608236	0.408301	0.275242	14.7796	0.2044	16.4919	1.74831	2.6184	4.49606	2.47898	2.87489	3.80085	4.04479	12.7275	2.01607	0.189196	3.06379	13.7668	1.50708	2.61695	0.530428	1.9616	5.96141
TCGA-DB-A64L	2.01644	0	7.66275	3.3885	2.85592	2.49225	1.99662	0.410054	13.5279	0.915402	1.90706	5.7844	0.707248	0.329239	0.924159	18.354	0.510413	22.5316	2.74129	2.196	11.3128	2.27758	7.25308	2.23247	3.08303	18.6359	2.61198	0.694352	0.967498	10.4208	2.42267	1.74726	2.25557	1.81421	4.09269
TCGA-VM-A8CF	1.66849	0	11.6703	11.1674	3.87674	3.67671	0.733435	1.72596	5.07098	0.368319	1.40421	39.7597	2.5657	1.53179	0.420265	6.07401	0.123021	4.8008	29.7174	1.26073	0.529681	3.39434	0.179665	0.721535	3.41595	12.6159	3.99864	8.18853	0.0210468	5.36989	1.77935	2.89012	1.54719	0.35104	5.05549
TCGA-TM-A7C3	4.12055	0	12.3373	7.00806	1.18067	6.55177	10.921	1.22494	15.71	3.81733	1.0121	18.0061	5.03282	0.715052	0.456657	4.70837	6.86981	12.4657	11.9624	2.66577	0.924434	8.61248	0.506524	1.75168	0.214011	10.5366	5.25292	1.30632	1.42408	9.02897	0.239624	5.45377	3.64771	0.181864	2.0894
TCGA-CS-6667	0.630137	0	6.90212	3.4016	2.74118	3.23376	1.54312	1.48874	11.4501	0.862359	0.753074	9.3091	0.816532	0.655851	0.0193335	13.2355	0.382321	15.7244	3.0644	1.8502	1.30329	2.63596	0.421216	3.79726	4.20648	15.3257	4.15445	1.73837	1.90029	10.1292	0.660965	3.12454	0.286366	1.07991	5.6101
TCGA-CS-6666	0.706849	0	5.36638	3.31094	1.56554	2.08455	1.82699	0.268593	12.84	0.554473	0.702665	7.59135	0.215951	0.878115	0.088608	6.14599	0.210794	11.3918	0.599604	6.29322	0.539697	4.29228	0.0801698	1.87769	0.877974	6.30826	4.40664	1.39182	4.65216	6.34161	0.0534266	2.08199	0.095927	1.54858	4.43174
TCGA-DU-A5TR	2.48767	0	10.3468	5.53117	3.58103	4.06673	5.2827	1.31468	5.90367	0.725541	1.04716	26.661	1.68405	0.805305	0.224083	4.74496	0.731087	4.61433	9.89797	1.58121	2.49784	2.28821	0.552622	3.07775	1.98244	12.8115	4.24191	10.1012	0.791499	4.15374	0.243202	2.71991	0.973521	1.56085	2.43149
TCGA-VM-A8C9	2.50685	0	7.79687	2.12652	1.14904	2.80961	0.188836	0.422393	3.43517	0.222513	1.80524	11.2538	0.166905	0.858534	1.16736	10.8694	0.533092	4.9394	16.9205	1.66382	0.124443	1.67117	0.363478	3.6305	1.22292	9.25479	2.43169	11.1132	0	4.08986	0.351622	1.92803	15.4645	0.417653	1.56863
TCGA-RY-A83Z	0.824658	0	13.5588	9.36791	0.783628	4.86696	1.27613	0.713617	4.93517	0.421674	2.37695	34.3972	0.886222	0.942373	0.153904	13.5431	0.124012	7.28161	16.3351	2.14463	3.38103	4.8105	0.365997	5.37327	3.99688	38.7283	3.99707	3.94103	0.302333	4.12458	0.880077	3.80579	0.441216	1.28617	3.00966
TCGA-S9-A89Z	0.99726	0	11.2238	4.56724	2.67556	4.42291	2.52057	0.532019	5.04697	0.791238	0.740073	17.0827	0.488181	1.29684	0.2542	4.97461	2.47882	7.9457	14.3745	3.324	0.732301	4.61698	0.267499	2.3097	3.07578	15.4777	4.71734	4.09908	1.25345	6.28491	0.272352	2.31951	0.313205	1.00008	1.82541
TCGA-DU-6403	0.969863	1	5.77024	1.64538	9.83469	3.01163	4.43241	0.696434	11.1103	2.57039	0.531507	9.04532	0.357218	0.735237	0.547597	5.96672	8.17177	14.2735	4.98181	2.31433	2.11286	3.82538	1.61906	5.38614	0.253791	3.67261	2.6841	2.04209	1.23424	6.68392	0.375762	1.56735	1.48225	0.3523	1.82954
TCGA-FG-6688	0.605479	0	10.6251	2.3277	11.1598	2.76674	1.34893	0.949942	7.63482	3.38449	1.19581	6.00222	0.489602	0.927643	0.740852	4.70612	2.96846	7.32596	10.1505	1.78482	0.432644	3.99368	0.858591	0.377553	0.232512	7.46621	4.07501	2.68177	0.182655	5.7449	0.237701	1.46507	8.86145	0.0896031	3.72185
TCGA-DU-A7TC	3.11507	0	5.76374	4.42704	1.85996	2.4467	1.32026	1.13311	8.57671	0.332359	2.84191	15.3442	0.448432	0.245619	0.62218	12.0873	0.291403	13.2634	4.49363	2.11992	4.11394	2.82126	5.51671	2.82818	1.46783	11.824	2.97327	1.3415	0.415449	5.4481	5.58031	2.09987	1.21702	0.502564	2.77437
TCGA-FG-A4MX	1.5589	0	13.6992	12.5515	1.0101	5.35848	2.21315	2.23585	3.99004	0.280207	1.20322	25.5047	2.47036	1.34503	0.0238432	7.9292	0.307717	11.2175	11.5548	1.56828	2.72003	5.12872	0.223492	1.92124	3.72095	30.4719	5.84902	1.29857	0.458521	6.76985	1.24787	5.30473	0.229967	6.30771	2.90672
TCGA-TM-A7C4	4.0274	0	3.99477	3.90498	3.06763	2.06717	2.25506	0.417768	18.109	1.03608	2.12609	8.95534	0.936851	0.144753	0.791193	7.28777	0.350091	15.2736	3.11353	1.6878	10.2893	2.9564	5.78977	3.03032	1.36632	11.3139	2.80944	1.21257	1.56499	7.06354	1.70595	1.85638	1.5044	0.762252	3.8489
TCGA-28-5220	0.873973	0	15.6035	3.33931	0.642228	5.23636	2.13204	0.768161	1.78212	8.28803	0.960119	44.613	0.379415	1.0694	1.58987	3.5522	3.90126	15.1395	18.0948	2.41899	0.0484952	6.4745	0.227447	0.282592	0.10425	9.30391	3.54735	5.20397	0.254786	10.0288	0.0473672	1.74079	4.47465	0.129795	5.22037
TCGA-76-4929	0.30411	1	14.7843	2.61242	1.49479	4.73636	3.32563	6.51738	2.39738	3.70803	1.1013	14.7577	0.577667	1.15453	0.972272	3.77742	0.799817	4.86944	7.97107	2.53859	1.5028	2.98238	0.0781564	3.96769	0.0463163	14.6496	4.039	2.44252	0.164801	5.32914	0.295937	1.10381	10.3662	0.163386	2.43145
TCGA-19-2629	2.01918	1	8.35556	1.82004	1.079	5.10623	1.90409	0.810646	2.24499	1.40991	0.619006	16.4232	0.220587	0.730867	0.240626	5.71226	2.37607	4.39177	5.50726	3.00435	0.961811	5.52181	0.36004	2.00364	0.987229	9.49279	1.73095	4.07411	0.241011	5.31855	0.0476067	1.4063	0.505093	0.150743	1.05152
TCGA-27-2528	1.31507	1	5.79848	2.43298	0.0879063	2.6254	1.45003	2.2895	3.41531	2.1579	0.95354	10.7941	0.246244	2.13797	0.664692	4.10109	1.6282	11.0166	4.54704	4.12805	0.123539	8.67084	0.182513	1.84945	0.148719	6.66294	2.63076	0.965065	0.288637	8.41756	0.141178	1.7627	3.24388	0.00881718	1.77924
TCGA-06-1804	1.13425	1	17.1141	3.00881	5.02738	9.75919	6.5728	15.1493	3.81983	7.96332	1.29678	8.83898	4.64722	6.56189	2.75306	2.59872	0.290291	11.4899	5.47567	1.78453	1.95332	4.18001	0.432479	1.10082	0.0794143	13.8414	5.32122	2.26076	0.924773	6.40895	0.294301	1.78138	6.13723	0.222466	2.66643
TCGA-14-0817	0.449315	1	19.013	8.08708	1.89783	2.80371	0.722011	2.77782	1.03444	1.83659	0.654879	42.4506	0.443204	2.03507	1.10559	4.72078	5.52331	7.04805	14.8857	3.45942	0.543778	6.16622	0.324489	1.50617	0.178126	6.84475	2.72651	11.458	0.158451	4.03002	0.261771	1.64736	2.59154	0.221774	1.72656
TCGA-06-0187	2.26849	1	8.84367	5.54531	0.527582	2.66767	1.84421	4.11342	2.70795	4.24137	1.18109	8.27399	0.540813	1.62844	0.664874	3.16683	1.08755	8.42563	2.53203	2.08556	0.0346003	4.22731	0.0456408	0.801256	0.0531284	6.52092	3.00601	3.80842	0.453696	5.8038	0.0217256	1.19813	2.34935	0.0132294	1.68745
TCGA-28-5218	0.430137	1	5.34313	1.2229	0.0965346	2.37216	1.23209	0.299773	2.48988	1.56974	0.543618	8.35042	0.182235	7.29116	1.49754	3.3559	0.229383	8.66212	3.08866	7.47585	0.0162797	1.11271	0.0429487	0.103489	0.27997	4.39542	2.12534	5.07392	0.0754684	1.44626	1.37146	0.236518	0.136262	0.0193652	0.65853
TCGA-06-5408	0.978082	1	9.82512	4.2652	0.169397	3.85766	2.49259	2.69886	1.35204	3.81525	0.845207	9.63261	0.663142	1.04392	1.43631	6.07395	3.44032	8.75503	6.1942	2.91708	0.439845	5.59176	0.152525	3.62121	0.292432	10.6282	3.90889	2.62638	0.466659	5.04209	0.328854	0.917102	3.76557	0.161818	1.16706
TCGA-28-5204	1.24384	1	8.47658	1.98933	0.260982	3.63823	2.97757	1.81135	1.61157	4.46679	0.348489	7.66935	0.476781	1.98615	1.3459	4.80206	3.56069	10.1044	4.67215	3.17666	0.0471561	5.18824	0.131317	6.38259	0.0450537	8.51332	3.43392	2.67732	1.12216	9.90008	0.0575739	1.22397	0.958554	0.0467447	1.55815
TCGA-12-0618	1.08219	1	6.51538	5.07248	1.97308	3.65976	6.21064	8.60916	16.568	1.7216	0.337691	10.0718	2.22304	0.527641	0.465041	7.03899	1.26969	5.60463	3.5466	4.30334	8.67789	7.74005	0.326037	7.36766	0.02679	14.7736	3.28664	0.839061	0.681706	5.42334	0.593403	2.59991	3.18145	0.804215	2.1577
TCGA-32-2634	0.739726	0	7.14983	2.51924	3.24349	8.3617	3.6452	3.56878	4.90067	1.54346	0.763988	13.1851	0.687007	2.19433	0.463457	6.915	0.42056	9.85854	10.4489	3.53369	1.38102	5.94549	0.481565	2.09863	0.125567	7.73534	4.74626	1.62966	0.696296	7.7025	0.265908	1.03686	3.93622	0.0967795	2.61783
TCGA-28-5207	0.939726	1	9.87399	2.11218	1.33301	4.69667	2.51662	0.648017	5.51472	5.18758	0.841508	13.6483	0.829653	0.951347	1.83131	7.5235	1.64226	10.2048	3.65872	2.73276	0.242432	4.54126	1.30459	3.57262	0.319798	8.94574	4.37554	3.48609	0.551708	5.93958	0.617544	1.08276	3.5181	0.034409	1.93977
TCGA-28-5216	1.13699	0	8.38315	7.72991	0.804324	2.44717	1.12666	5.09915	5.13688	1.83472	0.712012	18.3179	0.261674	1.73322	0.322499	8.87102	0.912981	7.33566	7.81442	3.51627	0.495497	5.93027	0.249186	3.24829	0.0932018	7.07458	3.29129	3.23943	0.999191	6.64567	0.040835	2.22357	3.8548	0.237605	1.41652
TCGA-S9-A6UB	8.86575	0	4.16656	3.16628	5.19561	5.73468	2.33636	0.855167	11.7411	0.602812	2.92362	7.20451	0.726692	0.307232	0.085083	25.9377	0.11745	15.177	3.13283	2.35236	9.42244	2.22879	2.75331	9.47184	4.50365	22.9317	2.6659	0.566002	1.32044	10.6193	2.25671	3.10923	0.675627	2.52279	3.21701
TCGA-HT-7473	1.37808	0	8.54093	3.38413	2.42539	2.43471	2.96179	1.04227	17.3053	1.13879	0.622692	5.96488	0.563691	0.952657	0.567085	6.16651	0.192367	10.5672	3.55864	1.85441	0.488081	2.70606	1.04289	0.730805	2.18516	11.0049	4.87049	4.37591	1.58196	7.59125	0.195025	2.10202	0.390681	0.773718	6.38777
TCGA-TQ-A7RV	5.11781	0	5.27826	4.37863	3.73224	3.06708	3.45704	0.929909	16.3404	1.06246	1.43399	8.30744	0.596672	0.386574	0.241778	8.83594	0.49283	12.4063	3.04011	1.78906	3.55277	2.95155	2.49219	2.65939	2.52639	15.3359	3.48952	2.01537	2.09549	7.00293	0.571734	3.68239	1.1399	1.2948	6.61846
TCGA-DU-A7TD	0.624658	1	6.28236	5.00389	1.13705	5.88908	7.38012	0.83831	4.40005	7.6518	0.390484	8.78974	2.35975	1.05543	1.06944	2.8144	5.53668	11.0026	3.92908	1.64476	0.823261	4.74321	0.32039	4.71741	0.0219845	11.0675	2.75245	2.55814	1.93428	9.01248	0.078663	3.4447	1.1831	0.346707	2.49916
TCGA-FG-8186	1.33425	0	3.93929	2.41615	11.9433	2.73503	2.93095	0.510306	12.4752	2.33424	1.02549	7.04586	1.83547	0.189447	0.248515	10.7143	0.387979	10.831	1.77331	2.04325	3.46029	1.93949	2.55241	3.50813	2.59066	14.9456	1.69474	1.5216	2.38955	8.38265	2.99811	3.92477	1.34113	1.58613	4.56673
TCGA-DU-8161	1.97808	1	5.60407	2.15868	2.71381	1.66128	3.3907	0.81495	5.77388	12.4742	0.789417	13.3054	0.976368	0.967255	0.990736	3.44751	1.87416	12.6561	4.84497	2.66244	0.640924	3.74259	0.860846	1.25731	0.193751	6.37102	2.80862	2.96493	0.529236	8.16644	0.249428	1.72423	3.6582	0.119125	6.29008
TCGA-QH-A6X9	0.158904	0	4.76662	3.35531	5.13819	3.67895	3.80022	0.865639	22.5662	1.94759	1.2721	5.15748	0.663714	0.19108	0.212678	8.88784	0.450614	11.936	1.82665	1.66759	23.4352	2.81021	1.77801	9.69182	2.65298	8.79816	3.00167	1.45178	4.13863	9.49585	1.76965	3.20079	0.98116	0.925324	6.97989
TCGA-S9-A6U9	7.99452	0	5.13579	3.42033	5.11773	2.54034	2.04345	1.40876	12.2551	1.06041	0.764374	5.33724	0.658768	1.3183	0.0852492	6.69989	0.664183	7.6074	2.04125	0.945365	0.673608	1.67118	0.33012	1.07052	2.13185	8.29827	3.45245	2.35899	0.650555	5.71604	0.411212	2.41799	0.293652	0.358905	4.76592
TCGA-HT-8563	2.35616	0	7.57934	3.6867	1.5859	3.0645	2.01277	0.842557	2.84456	2.52482	0.764629	4.7954	0.371442	1.08164	0.99917	2.27224	0.555499	6.54228	2.97876	1.85696	5.83262	2.03574	0.704625	0.309746	0.574156	8.4903	1.83626	9.53039	0.722811	4.3128	0.182436	1.35923	0.0906299	0.586045	2.31754
TCGA-DB-A64W	1.2	1	4.44266	1.7925	7.21361	5.68916	3.78425	1.19617	15.6569	0.742231	1.7936	3.79966	0.637758	0.163795	0.34856	22.6205	0.238539	23.3618	2.13996	2.29179	8.01655	2.23427	7.54442	6.96471	3.64296	11.1748	2.65846	0.309113	2.58633	13.2666	3.56706	2.46962	1.14474	2.41998	2.29658
TCGA-TQ-A7RN	2.81096	0	3.45219	2.16643	5.40409	4.01432	4.08461	0.759995	10.8231	1.0404	1.29459	6.82256	0.88236	0.374647	0.112247	11.6654	0.14398	15.3371	1.29331	2.54549	6.82728	2.1203	1.31421	4.56675	3.35914	18.4007	1.91612	0.542431	5.84372	12.6611	1.1447	3.50572	0.376199	2.66031	6.98805
TCGA-DH-A7UV	1.55068	0	6.36534	6.95657	7.14743	4.20906	4.79529	2.51579	16.995	1.27278	0.75149	16.6662	2.43632	0.977403	0.0569844	9.91348	0.725053	10.6148	3.42599	1.6778	3.84547	3.50281	0.197595	4.70583	3.21134	22.911	4.93921	2.48685	2.62547	7.73644	0.072154	4.52364	0.213466	1.51582	4.05269
TCGA-FG-7637	2.79452	0	3.1525	0.910304	2.84027	2.39348	2.06773	0.259288	16.7318	0.968029	0.568325	2.71577	0.289687	0.312189	0.296907	15.1269	0.281314	13.9446	1.15646	2.56625	2.70953	1.93573	4.53119	9.4028	4.4805	11.9353	1.67565	0.362966	5.53472	13.7215	1.10623	4.1422	0.592483	1.83491	4.52055
TCGA-HT-7874	3.09589	0	3.33003	0.820227	11.4085	2.11121	1.29516	0.389156	26.8704	1.99436	1.85894	3.96154	0.240515	0.173365	1.20342	8.44528	0.378713	36.1397	1.72636	1.18477	4.41133	1.94628	13.6015	2.22988	1.57267	8.47799	2.36033	0.550157	0.44544	7.75342	3.43151	1.52097	2.65694	0.43512	5.43618
TCGA-DB-5280	3.04658	0	3.7565	2.79694	1.78144	3.50404	1.92823	0.757265	10.5742	1.43894	0.88904	7.18412	0.468355	0.513364	0.0448952	6.84654	0.292375	12.8222	2.1383	1.89549	1.92153	3.68029	0.255904	2.89816	2.18451	10.4086	3.39635	1.34448	4.30654	9.08421	0.495377	2.44978	0.145811	1.01869	7.35229
TCGA-E1-A7YD	1.19178	1	11.9026	5.78928	3.44787	8.85731	5.82449	1.10228	4.78253	4.2009	0.647598	30.7998	1.74223	0.583127	1.48962	4.99846	1.46379	7.85135	11.5891	1.72166	0.546401	5.13976	1.56049	3.14577	0.0110811	6.63787	5.10299	1.21355	0.989292	10.2226	1.31409	2.73545	2.7274	0.30352	3.3408
TCGA-HT-7858	4.21918	0	6.22642	3.78842	11.4105	3.03664	3.00885	0.774546	13.5964	1.03876	0.641039	4.68808	0.795423	0.644879	0.216064	8.97733	0.173804	11.0949	1.36106	3.16066	2.27454	3.63324	0.464798	4.1949	2.97546	11.8404	2.91101	2.24097	3.14564	7.92839	0.751191	2.91861	0.24977	1.33274	3.83231
TCGA-HT-7695	1.21096	0	3.42872	0.749417	7.40904	2.3293	1.63256	0.622342	22.1437	1.45307	1.71587	3.35814	0.215741	0.200488	0.443341	9.22097	0.262778	27.8457	1.45114	1.81892	2.33211	2.25789	8.47304	1.87149	2.23986	9.7468	1.86037	0.89957	2.17559	9.35236	2.80363	1.81856	0.96288	0.623147	5.26542
TCGA-HT-7480	6.26575	0	3.31729	1.21564	6.40364	3.55475	4.07101	0.860136	15.2939	1.76801	1.20298	3.317	0.909525	0.283338	0.256637	12.7346	0.176843	13.6163	1.25757	2.62196	8.26339	2.45022	3.05123	6.23943	2.46251	12.8678	2.14414	0.877549	3.38474	8.81143	1.80033	2.78762	0.64625	3.57236	5.07918
TCGA-P5-A5F0	0.786301	0	3.1339	1.94746	6.14402	3.61951	5.98419	0.607181	18.9576	0.962085	2.44174	5.92911	0.900408	0.266394	0.600344	11.5638	0.240608	17.0375	1.07742	1.64465	12.8549	3.71542	7.56583	6.33807	2.54144	13.5777	2.31662	0.483401	4.82478	8.23922	2.79103	2.27776	1.22226	3.71689	4.81232
TCGA-TM-A84B	2.07671	1	6.36432	1.79201	9.78895	3.71377	5.52787	0.913195	4.97478	5.87842	0.478831	15.5725	1.06434	0.350706	1.56111	7.50541	1.36368	14.2206	5.49829	2.2654	1.26877	7.14733	4.00225	1.7524	0.0455845	8.86216	1.54417	0.368745	1.00267	10.3322	0.0854365	2.54839	5.6923	0.0756726	4.42081
TCGA-E1-5322	10.8986	1	6.76571	2.06534	1.63075	3.46784	1.86664	0.402295	6.93383	0.685011	0.867886	4.90409	0.322374	0.624549	0.201851	7.281	0.237273	15.7683	0.940996	3.69647	1.42979	2.27702	0.354192	7.33055	0.867667	10.5722	2.04991	3.99897	1.38905	7.57896	1.08248	1.66086	0.398777	2.03544	3.53514
TCGA-HT-8108	0.208219	0	5.08878	3.49917	3.22885	3.4755	3.77117	0.756195	12.2327	1.67698	0.948742	6.84377	0.828367	0.383572	0.1422	7.8521	0.20037	14.8668	3.5871	2.17462	3.93263	3.13958	0.983737	5.3084	2.53798	11.7327	3.92369	3.41705	8.0051	7.50824	1.00646	2.92035	0.28636	1.9829	5.1463
TCGA-19-1389	0.386301	1	7.13211	2.72037	0.0694945	2.96502	1.15596	3.16248	1.17531	2.04122	0.380348	13.6566	0.411101	3.12339	1.41418	3.24419	1.11902	8.20523	2.54115	4.06369	0.0279039	4.84336	0.0920192	0.146342	0.0119969	3.03837	2.56468	7.74878	0.0155226	2.2591	0.110382	0.352056	1.5715	0.0746833	0.747945
TCGA-26-5132	0.783562	0	11.9	6.09499	0.515434	7.87129	3.52317	13.5421	1.72535	3.75383	0.617748	6.98266	1.83921	2.68352	1.42485	6.12999	3.45997	7.08718	5.69006	2.67019	0.0965816	5.52395	0.147515	0.230237	0.0764917	7.46421	5.15728	2.12147	0.480717	7.57897	0.0558563	1.04169	1.97844	0.022675	1.47438
TCGA-DB-A75M	1.49041	0	5.10907	3.44699	3.70024	3.72638	2.30638	1.56728	11.4858	1.31489	0.909956	6.93201	0.600242	0.549838	0.0496113	6.13528	0.257381	6.99947	4.75565	1.19401	1.64468	2.83142	0.234931	1.13218	1.99466	13.5066	3.62641	2.21765	2.17721	6.4046	0.154629	2.78423	0.205072	1.02397	4.42758
TCGA-DU-6410	0.663014	0	3.24295	1.2406	2.60052	2.56102	3.26046	0.540144	22.6835	0.464233	0.822292	1.98726	0.569432	0.106607	0.156495	20.4251	0.0457448	19.8413	0.545962	5.69128	6.65313	2.61366	2.86968	6.16479	1.59188	10.2306	1.74815	0.138574	3.26564	10.4043	1.07931	2.00823	0.151398	1.83133	1.89828
TCGA-TM-A84S	1.24384	0	3.92893	2.18713	6.45737	3.34601	1.72501	0.823736	9.18046	1.95567	1.74202	7.23191	0.769585	0.376623	0.20691	11.3445	0.374446	11.3989	2.95415	2.13187	3.81483	1.98988	1.93517	4.53541	4.41415	13.3578	1.83391	1.45146	1.05566	10.2308	1.29391	2.44821	1.152	1.311	7.37782
TCGA-DU-8167	1.29041	0	6.47088	4.20521	10.112	2.65131	1.93556	0.65351	12.6167	0.975411	0.843166	8.94662	0.541287	0.600459	0.107411	11.9634	0.173899	9.64081	5.78366	2.87476	1.68237	3.61242	0.50189	5.48582	3.61658	15.1024	3.68553	5.78855	1.19854	7.65025	1.10818	2.81823	0.517987	1.38233	4.11415
TCGA-HT-7879	0.306849	0	5.21985	7.5254	3.22394	3.04066	4.26505	1.2473	12.6804	1.4733	1.21784	12.5813	0.799232	0.810962	0.118202	8.28288	0.713535	9.23133	3.44556	2.15087	3.21598	3.18361	2.20842	4.21203	2.57827	22.5989	4.50506	2.01427	5.10393	7.69586	0.864745	3.27494	0.264655	4.39145	4.63175
TCGA-28-2513	0.608219	0	9.5338	2.48643	3.90588	2.94024	1.39905	4.02075	1.00211	4.26573	0.625124	7.66089	0.35857	1.51092	0.928767	3.09777	0.59793	3.90336	6.33225	2.39575	0.121367	4.98736	0.203756	0.6444	0.0118592	6.56884	1.95435	7.95497	0.168788	4.09874	0.242476	1.17059	2.24608	0.00984341	1.74355
TCGA-HT-7608	1.83836	0	2.4897	0.566308	4.19499	2.98405	0.878406	1.03946	11.8563	2.91845	0.683415	4.69896	0.215771	0.218829	0.141986	4.408	0.300695	11.4351	1.34963	1.06999	0.846519	1.45455	1.04391	1.11074	1.81211	7.03417	1.41054	0.913487	0.168182	7.42254	1.0318	1.71342	0.516733	0.234817	7.10053
TCGA-S9-A7J2	0.169863	0	3.70393	2.62823	5.01429	4.17722	4.53083	1.73961	9.996	0.684938	1.04352	7.36084	1.16233	0.645815	0.0152644	14.3477	0.142984	16.0047	3.33717	2.29634	6.2135	1.75789	0.76567	5.33572	4.424	18.5768	1.54484	0.652917	4.19525	10.2768	1.60422	3.73906	0.228725	4.1075	5.29823
TCGA-76-4927	1.46575	1	10.7728	2.29001	2.26723	3.57991	2.40156	2.82872	2.57931	3.66168	0.338395	11.9155	0.297625	3.49878	0.887469	4.57802	3.68917	6.25666	3.9094	2.71968	0.167898	7.18437	0.281873	1.74652	0.147652	6.75528	2.8388	6.59471	0.191044	4.82586	0.167719	0.700272	1.97109	0.0476603	1.27725
TCGA-DU-A7TI	3.2411	1	3.4011	4.26751	3.62423	2.76108	2.84413	0.670111	16.7423	1.9926	1.12568	17.9012	0.623942	0.245624	0.23959	10.7799	0.330192	11.1294	3.11571	2.57387	3.22257	2.6356	2.11915	3.32478	2.77306	25.5865	2.92294	1.78921	2.82009	6.40299	1.53777	2.56606	0.657395	1.59676	4.48472
TCGA-HT-8110	1.14795	0	6.99524	3.8709	2.22048	3.96856	3.48467	0.420623	5.88333	5.75302	0.880398	12.1624	1.05314	1.46889	1.76023	4.63649	1.43528	9.21287	4.40238	1.63864	0.452079	4.03734	1.07129	1.40195	0.0774022	7.78591	3.09836	5.78498	0.667661	6.68665	0.254973	2.03892	3.94657	0.0571074	3.37713
TCGA-28-5213	0.816438	0	20.9441	4.69307	1.5519	3.36049	0.967709	3.30592	1.11085	4.7608	0.888614	20.3912	0.322988	1.92861	1.97411	5.29937	1.12507	5.39872	10.0564	2.74276	0.121471	3.94509	0.211213	1.00033	0.0712156	12.5463	2.02122	16.0269	0.399293	5.17812	0.0970732	1.02171	1.96081	0.0295554	2.87895
TCGA-14-1402	2.67123	1	19.0261	6.35275	3.18019	3.01664	1.13485	5.75514	1.94067	4.59129	0.958974	16.0148	0.544227	0.479104	1.14939	5.64075	7.27667	11.3686	9.59336	3.96575	1.14831	6.59547	0.714327	1.25983	0.0561023	8.96342	2.70301	4.0408	0.526275	8.67792	0.587882	0.922955	2.29363	0.116416	2.60586
TCGA-06-5858	0.512329	0	7.78939	4.9069	2.05766	3.54445	2.59479	6.57426	3.43281	4.50806	0.654892	9.80284	1.05093	1.0645	1.5583	4.06694	4.59011	7.56371	3.89351	2.56512	0.116602	5.18095	0.516795	0.355792	0.0902366	5.76286	4.08944	3.76204	0.311348	5.71682	0.0410002	1.76893	1.65635	0.0457715	1.4803
TCGA-41-2572	1.11233	1	7.60506	3.92353	0.841155	4.19359	3.66495	3.46521	1.5613	4.28258	0.795941	18.0573	1.94006	1.66571	1.19512	2.49286	3.13904	8.66309	7.34503	2.80387	0.484666	7.97442	0.109152	0.267709	0.0254117	8.65037	3.19898	3.31271	0.575395	7.02546	0.116905	1.84396	0.667867	0.126554	1.49758
TCGA-27-2519	0.865753	0	10.4093	2.2733	1.68426	3.68728	2.43609	2.12563	2.7253	3.27318	1.07171	12.5675	0.254961	1.68794	1.17442	3.47998	0.939213	3.23136	5.48018	2.50862	0.62049	2.66369	0.254012	1.74694	0.0114988	9.39819	2.34239	9.02979	0.223171	4.73743	0.12931	0.793492	3.86637	0.314962	1.39454
TCGA-27-1830	0.421918	1	9.66809	5.36627	2.23237	3.54027	5.28811	3.19324	6.5035	5.19126	0.6331	11.8145	1.9124	1.06586	0.696786	3.87369	1.76932	5.37797	4.99373	3.18692	1.76536	4.67278	0.378759	0.659144	0.068584	12.0956	3.532	5.31322	0.576806	5.2809	0.105172	1.3011	2.53687	0.659398	2.32938
TCGA-06-0878	0.59726	0	8.40173	5.4384	0.683579	4.71987	4.20928	3.91833	2.3561	5.07685	0.42947	10.3359	0.693784	2.43618	1.90819	4.50192	4.89374	10.4787	3.03769	3.01345	0.181459	5.54223	0.5984	2.90078	0.0458917	10.2895	2.01675	4.38337	0.801608	5.13269	0.0234579	1.06513	1.1104	0.0666598	1.701
TCGA-06-0646	0.479452	1	9.85051	6.63184	0.484892	6.44239	5.40789	3.92318	4.45745	3.79077	0.736019	14.9913	2.30544	0.78024	1.44656	3.09255	1.69874	5.39398	6.4643	2.67263	2.68382	5.17846	0.829734	3.61129	0.439465	8.41532	3.96672	5.72858	0.524875	4.95878	0.149757	2.17644	3.25298	0.701475	1.74057
TCGA-06-0157	0.265753	1	7.94567	3.095	1.89769	5.70746	3.63231	2.11217	6.20365	2.75613	0.428238	16.1929	1.48945	0.950361	1.29193	2.56846	1.08427	11.7288	7.24109	3.45597	0.659021	10.141	0.212636	1.89878	0.05096	8.19215	3.5645	3.48175	0.580238	5.53415	0.0312584	1.97943	1.95584	0.181882	2.17812
TCGA-27-1835	1.77534	1	8.50252	7.63614	0.545668	6.93983	7.9154	1.14075	3.30091	3.44981	1.08414	23.6757	4.65204	1.28371	0.39929	5.58362	1.27203	10.1371	4.30146	5.83798	0.0466778	6.8519	0.0351841	2.73415	0.0286694	12.9855	4.06186	0.829539	0.204021	7.13809	0.0586184	1.27982	2.38006	0.0178472	1.28496
TCGA-27-2524	0.632877	1	8.92009	3.35106	0.417199	3.10749	0.771067	9.30365	1.26083	2.13554	0.43558	12.8259	0.381085	1.1747	0.431273	4.95188	2.17272	3.55545	7.30987	4.40191	0.368536	7.8544	0.239383	1.47754	0.0480144	5.54522	3.30242	7.16302	0.155312	3.2712	0.269973	0.862484	0.901364	0.0597798	0.603156
TCGA-14-1829	0.59726	0	19.3558	9.38216	6.5165	1.304	0.594117	5.539	1.00171	2.44765	0.303731	30.6766	0.381316	0.686751	1.34096	5.9254	3.18792	9.50187	9.33827	4.46849	0.125287	7.79917	0.208549	7.55203	0.166727	11.4227	2.6889	10.0554	0.265508	5.73765	0.131114	1.24542	2.64306	0.0745167	3.72741
TCGA-76-4932	3.99452	1	4.67896	4.99944	0.16907	2.35693	0.927511	6.53735	3.5629	2.59724	0.698459	25.326	0.391235	2.31062	0.940244	3.97907	3.67232	8.9145	4.41773	3.36126	0.0855365	5.51884	0.0438784	0.430471	0.0204308	8.82172	4.11045	3.27361	0.277567	5.41541	0.0104434	1.48798	2.47171	0.0254371	1.73952
TCGA-06-0190	0.868493	1	5.17189	4.11645	0.261461	2.93661	1.77781	4.94479	1.75509	2.34155	0.357528	8.77623	0.653228	2.67527	1.02607	3.04805	1.19515	5.4665	3.26012	5.54713	0.202197	3.48489	0.0960304	0.53505	0.0236231	5.13774	2.05912	4.98165	0.187208	3.13007	0.0694277	0.780471	1.05346	0.152932	1.02943
TCGA-06-0645	0.479452	1	7.10135	8.4833	1.13891	2.46642	2.20215	2.96448	2.0613	2.24346	0.525703	9.6115	0.742698	1.16056	0.765584	5.04419	3.42585	6.52503	4.25611	3.05636	1.15946	4.92227	0.641696	0.360521	0.162553	5.36688	3.12529	11.5377	0.364562	4.54711	0.0886297	1.25664	1.31105	0.152913	0.998306
TCGA-QH-A6X3	0.857534	0	5.40955	5.79303	3.32961	2.99962	3.63595	0.575059	19.7913	0.769361	0.757091	8.13216	0.918907	0.457469	0.0560098	8.86654	0.419721	13.4418	2.9738	2.72035	1.42452	2.24275	0.398313	2.29687	5.15333	15.8308	3.12572	0.259	2.93639	10.545	0.233023	2.4147	0.198446	1.90838	4.71535
TCGA-WY-A85E	1.73425	0	5.537	4.81911	1.48227	3.06365	4.05104	0.247471	19.2389	1.48655	1.64138	14.7836	1.48161	0.250559	0.153385	20.7627	0.205253	12.549	5.70868	2.66179	5.76536	5.39012	2.92821	8.93849	1.45649	17.6504	4.8245	1.28909	2.03669	9.96715	4.9109	2.8076	0.754791	2.99603	4.36049
TCGA-HT-7855	1.60274	0	5.3891	3.28188	1.61062	3.19463	2.88407	1.26612	18.9872	0.530759	0.543408	5.66855	0.453014	0.636561	0.00352335	11.4895	0.312435	16.7526	2.88858	2.52417	1.81484	3.55155	0.174055	2.79711	4.40754	12.5191	3.70366	1.15135	3.92987	10.5475	0.294445	2.41686	0.116512	2.11896	4.78079
TCGA-HT-7854	0.8	0	5.17857	2.03479	5.83888	1.68464	1.02716	0.722091	16.0786	3.50933	0.828807	5.00497	0.586619	0.519081	0.361243	4.59727	0.127766	12.5575	2.86551	1.31846	0.287335	2.08621	1.59626	1.0538	0.554329	4.33276	3.73744	2.10901	0.819698	6.77522	0.420977	1.86191	13.9279	0.00985944	4.9297
TCGA-HW-8321	1.63288	0	5.77113	3.79807	4.85385	3.47789	3.28366	0.935771	19.816	0.641483	0.740022	3.83525	0.515053	0.690099	0.0985324	13.2621	0.319192	12.3858	2.22147	2.8272	3.69008	3.28311	1.07648	4.97349	2.47891	15.1742	2.79677	1.1818	6.36549	8.61999	1.03709	2.74566	0.515476	1.87713	4.62517
TCGA-R8-A6MK	7.40274	0	2.86804	2.3283	6.07893	2.93476	2.12667	0.720476	13.7073	1.08672	0.938505	4.99006	1.13708	0.354913	0.32725	8.14052	0.168544	12.0469	3.46659	1.89818	3.59602	2.04087	1.21792	3.75333	3.65206	13.378	1.39635	1.18045	1.80579	9.6499	0.649315	2.84037	0.613599	0.936444	10.1457
TCGA-HT-7902	2.61918	0	5.47707	2.98412	20.6034	2.94027	2.83434	0.499061	14.003	1.87817	1.2418	10.441	0.684299	0.358192	0.234937	5.74233	0.317034	10.0977	3.63082	1.805	1.65857	2.80782	1.82453	1.74323	1.82618	16.2736	3.08665	1.5401	2.55327	7.04146	0.294059	2.72799	2.0762	0.696813	3.94012
TCGA-DU-A7TG	3.70137	1	6.82565	1.85645	4.04466	1.54093	1.40413	0.418773	23.6148	1.18473	2.75942	5.33615	0.3755	0.116599	0.963611	9.94062	0.503052	34.4826	2.0621	1.38672	6.75633	2.20351	13.0932	0.840322	0.858811	9.3963	2.76352	1.24954	0.42487	5.35102	6.19748	1.32301	2.96102	0.298762	3.59221
TCGA-TQ-A7RJ	3.36712	0	4.63718	6.04525	2.64331	3.70751	3.67826	1.79576	13.8052	1.41246	0.795018	9.37386	1.02316	0.603915	0.174904	8.34354	0.715305	12.4164	5.77321	1.80764	5.35083	2.88947	0.821025	1.89356	2.5231	13.7046	3.79943	2.96556	2.71499	7.36764	1.26799	3.15023	0.333136	1.11058	5.9472
TCGA-FN-7833	2.29315	0	6.75537	2.68667	2.24879	3.5423	2.72066	1.34718	7.22024	1.23523	0.790378	5.3647	0.720511	0.57392	0.0537759	7.00522	0.179103	10.9478	2.54729	1.6602	1.40872	3.13207	0.33241	3.12184	2.05143	9.41731	4.59784	3.8682	1.16054	6.49699	0.508416	2.77034	0.281563	0.785031	4.77086
TCGA-RY-A83Y	0.454795	0	3.71224	4.04082	4.18774	4.69754	2.39951	1.18645	5.29602	0.595249	2.69936	13.8777	1.09476	0.578104	0.144448	14.9478	0.451021	9.42315	8.79722	2.01301	7.66266	1.81988	1.32914	5.68267	4.70273	25.4305	1.94216	0.866751	0.710992	10.4364	4.48107	3.76375	0.735694	4.70952	3.69025
TCGA-KT-A74X	1.2	0	3.33933	2.14552	11.0182	2.70837	2.35999	1.47809	7.43522	0.445384	1.27277	7.3801	0.659164	0.457626	0.302934	12.509	0.142315	10.5941	1.30634	2.70497	5.82543	2.0436	2.72899	8.87119	3.57304	19.1443	1.40872	0.574038	0.570091	9.88598	1.55542	2.47087	0.206785	1.95429	2.03715
TCGA-TM-A84M	2.06575	0	2.81036	3.08236	2.08639	6.13751	5.1649	0.783744	9.22356	1.73983	1.61711	5.09883	1.19111	0.242465	0.424085	11.1395	0.0741527	12.7016	1.39073	4.75707	13.4632	3.11557	5.41154	7.68868	4.06549	24.8279	1.65427	0.189568	9.50109	12.1364	2.22309	3.93102	0.140239	3.82788	2.48291
TCGA-DU-5852	0.561644	1	5.68194	2.36713	1.83417	3.09791	2.12377	0.558883	6.91709	2.87872	0.595533	14.7432	0.717723	1.38493	0.690634	5.57619	2.3625	12.1459	4.2396	3.14494	0.972249	4.41786	0.625727	3.80366	0.092703	4.9913	2.44974	2.39129	1.0359	6.73226	0.327394	1.05519	2.4118	0.0734483	1.72524
TCGA-FG-5963	1.49863	0	10.0187	3.03606	4.93569	3.98172	4.09182	0.194312	5.49144	1.70642	0.764359	10.3415	0.492144	3.20606	0.838426	4.5693	1.02296	9.7779	5.17841	2.63187	0.825571	3.32607	2.51034	6.58688	1.71385	7.46716	4.42234	2.5161	0.916401	10.3047	0.115394	2.15318	2.26354	1.33939	0.803987
TCGA-06-0649	0.175342	1	15.8415	3.22381	2.52053	5.33257	4.64421	2.82068	3.47096	4.76546	0.662041	26.1219	1.23306	1.18834	1.29648	3.7909	0.501192	5.25107	10.3478	3.17359	1.45839	3.85453	0.183772	0.678359	1.22344	8.76992	4.4921	6.96262	0.181384	5.11265	0.182401	1.14236	6.05021	0.174537	3.35206
TCGA-12-0616	1.2274	1	11.0548	3.02952	0.951031	3.60878	2.42616	0.910013	3.30888	1.33163	0.484844	17.7888	0.44948	0.981831	0.581658	6.29647	3.42475	8.10667	5.52559	5.31777	1.4602	5.97623	0.205244	8.36943	0.0171529	5.92124	3.47846	3.26606	0.532651	5.05565	0.0350714	2.05615	1.57426	0.512545	0.8885
TCGA-06-2562	0.235616	0	8.3164	4.23863	0.578235	3.93	3.50348	5.0768	3.622	4.69334	1.03229	11.769	1.18064	1.06252	1.56389	4.87169	1.99467	5.2917	2.63003	3.13408	1.47227	4.65367	0.567485	0.740683	0.102757	12.0907	3.41974	5.39022	0.279207	5.3062	0.357172	0.566543	2.82069	0.191906	0.949802
TCGA-DU-6392	17.5973	0	7.61438	2.04252	1.75383	2.62092	2.60533	0.661673	18.4236	0.828004	1.46927	5.238	0.166443	0.628924	0.488899	4.78653	0.135306	8.04295	3.2187	3.68632	0.416125	4.02084	2.57774	7.53907	0.0688106	5.23977	4.4981	2.22223	1.56698	6.91535	0.689393	1.22993	0.838212	0.574002	1.68611
TCGA-S9-A7R7	8.21918	0	7.69052	2.44137	1.94391	3.93692	2.12853	0.791742	7.5737	2.04575	1.23745	7.211	0.377241	0.726874	0.437676	1.50007	0.436007	6.80146	3.18954	1.60705	2.2095	2.94849	0.471235	0.815835	2.18127	13.9562	4.08268	6.08775	1.3694	3.35131	0.224314	1.45765	0.441521	0.107131	2.9745
TCGA-HT-8564	1.30959	0	5.74176	3.25012	3.21567	2.52572	2.94811	0.316237	20.3818	3.59871	1.91468	4.30609	0.938865	0.507825	0.870306	5.98248	1.07802	18.6103	4.07161	1.83046	2.91369	2.17368	5.22618	0.236119	0.816211	6.56556	3.81352	2.23581	0.436207	6.30896	1.7142	3.32301	2.53895	0.94994	3.6544
TCGA-QH-A6CU	1.23562	0	4.31617	2.06226	7.68338	3.22644	0.759434	2.18135	9.24196	1.56114	1.07537	9.42932	0.87439	0.551658	1.08085	7.94698	0.168017	6.96252	3.1439	1.31531	0.60938	1.8667	0.391336	0.904738	4.91816	11.641	2.17247	2.21659	0.029736	7.41886	0.669606	2.28486	1.33266	0.214602	6.8896
TCGA-DU-6393	4.34247	1	4.32335	1.30634	8.3032	4.36085	2.35115	1.75774	12.3292	0.830515	1.40278	3.92512	0.463467	0.247653	0.0567232	15.5405	0.193213	8.73263	1.12737	1.76235	6.83047	2.07166	2.70025	10.2839	3.00821	15.3793	2.45298	0.210634	0.677634	12.0119	2.67705	2.79321	0.319731	2.33255	4.26912
TCGA-TQ-A7RP	2.50411	0	4.50741	2.36348	17.0339	1.81963	2.87402	1.85015	13.1374	5.93893	1.15378	15.7522	0.616016	0.444149	1.18118	4.07934	1.3639	9.18119	6.64727	1.33854	0.454923	3.47897	0.483938	0.367322	1.21454	10.2583	3.15897	0.829361	0.224496	5.37543	0.217691	1.70703	4.77062	0.058915	6.03726
TCGA-HT-7476	0.545205	0	5.83667	1.9791	3.07359	2.04111	1.72745	0.583291	14.879	1.04297	1.81678	3.76328	0.309704	0.419378	0.524967	7.43079	0.224541	14.78	2.90856	1.8345	2.66004	3.43643	4.43248	2.42979	1.42511	8.51572	2.97644	1.67933	1.50971	5.688	0.810408	1.63639	1.27078	1.63755	4.22967
TCGA-DU-5853	1.11507	0	3.75253	2.82453	2.65019	2.61088	2.05071	0.254976	15.88	1.89042	1.11271	3.44327	0.296329	0.359143	0.266603	10.6965	0.200697	14.3348	3.47319	2.41189	2.44507	2.84015	1.19352	3.40092	1.94504	8.84838	3.03972	2.41498	3.32433	9.56795	1.03584	1.96778	0.483078	1.10007	5.31465
TCGA-DB-A64R	2.61644	0	3.88789	2.2952	10.9334	4.25211	4.18238	0.832329	11.1261	0.736713	1.44525	5.00254	0.894723	0.271313	0.543745	18.3315	0.166691	17.5154	3.07996	1.91565	12.9301	2.22471	2.69739	8.58172	4.79996	17.3084	1.97866	0.670501	5.22829	12.3882	2.95426	3.31237	0.704931	3.91803	4.54241
TCGA-HT-7604	10.2055	0	6.22978	2.31307	4.73439	2.05499	1.69617	1.99539	19.9198	0.860879	0.819091	4.49858	0.486914	0.297351	0.051324	10.6895	0.153843	12.2193	1.45869	3.11732	1.23803	4.03777	0.137823	4.66193	3.61067	24.5925	4.08169	0.965151	1.27213	9.97029	0.710522	3.53793	0.268725	1.67787	7.1297
TCGA-TQ-A7RK	3.67397	0	8.42429	7.35963	4.11237	8.10688	4.32801	1.18185	11.1753	0.724376	1.13782	11.553	0.980962	0.687499	0.069893	9.8394	0.596519	10.4405	3.2465	4.24538	1.62892	4.35112	0.199437	2.08259	2.72694	28.4358	4.87095	1.78975	2.42868	7.52995	0.471033	2.78101	0.386046	2.80179	3.41725
TCGA-DB-A64Q	0.49863	0	4.0234	2.19521	9.5831	5.60127	2.68968	0.690111	9.46812	2.40291	1.24752	5.51581	0.903593	0.295613	0.965147	7.51034	0.834109	14.0585	2.82595	3.73402	5.65513	1.91065	5.61927	4.62782	4.60015	14.3704	1.92991	0.770403	1.86433	18.1072	2.22592	2.67273	0.507592	1.43516	8.35578
TCGA-FG-A713	1.70411	0	3.29935	1.33856	6.0087	1.85923	1.65682	0.843435	18.5843	1.2746	3.40949	4.16651	0.461459	0.128094	0.694533	8.20107	0.596947	18.9901	1.71434	1.13842	6.34667	2.33052	12.8216	0.923161	1.29496	9.45911	1.95198	0.443185	0.454786	5.40927	4.52004	1.56612	3.46514	0.61804	2.40997
TCGA-FG-6691	0.282192	0	5.39211	1.41246	3.21674	2.25651	2.27822	0.572851	19.938	1.04503	0.630214	5.30869	0.243769	0.430648	0.313845	6.50082	0.418109	11.8869	1.63911	2.67182	0.474163	3.20118	0.325983	3.05575	2.04725	11.0117	3.83565	3.82707	2.49241	8.87822	0.238435	1.99106	0.18018	0.957182	7.43511
TCGA-FG-A87Q	0.476712	0	4.59455	5.9074	12.8853	2.64094	2.82996	1.20668	5.93297	4.3227	0.920634	13.749	1.33483	0.815158	0.727328	5.63618	0.421112	10.5209	12.5314	1.04465	0.466237	3.22304	0.501524	0.158778	0.632381	10.6942	2.53435	4.61062	0.478584	8.34881	0.341543	1.96716	7.05821	0.118844	7.83108
TCGA-DH-A66G	1.43288	0	4.58191	3.37357	0.756557	3.1761	2.90222	0.52874	16.8996	1.34109	1.73389	4.08326	0.519639	0.176661	0.527858	4.52618	0.412713	14.7159	1.87646	1.9454	5.326	3.14144	4.76518	2.45205	1.36073	11.405	2.38453	1.60743	3.60376	5.70707	1.13026	1.87178	0.993401	0.719135	4.24038
TCGA-FG-A60L	1.36712	0	6.77274	5.8737	7.23334	2.72033	0.996933	1.24375	6.1303	0.588281	1.53697	17.1859	1.11122	0.734575	0.174367	14.6559	0.584558	4.7335	16.4522	2.06376	1.76076	2.17144	0.404536	2.89911	2.65978	21.2859	3.47578	6.27364	0.411797	6.29824	1.12717	3.64085	0.616438	1.23593	2.81696
TCGA-S9-A7R1	14.1534	1	2.72097	2.28802	12.455	2.64353	3.0042	0.263588	15.4667	1.0057	1.20559	10.2396	0.700298	0.260946	0.442146	23.1873	0.231576	16.4224	2.13076	2.16784	9.527	1.96034	1.99814	3.82653	3.35642	11.997	1.62811	0.234503	0.975228	8.6744	1.60129	2.74804	1.18895	1.73998	5.95054
TCGA-HT-7474	0.312329	0	5.65979	1.29111	9.42702	1.53965	1.22533	0.461727	22.6486	2.18676	1.38731	3.96983	0.284534	0.26064	0.560603	6.23829	0.330848	18.8865	1.64986	1.26215	1.82085	3.00295	7.24773	1.46381	1.29712	9.32642	2.89906	1.24869	0.937887	4.87264	1.52888	1.57959	1.39419	0.183663	4.81142
TCGA-WY-A859	3.32329	0	7.43274	3.85113	3.05048	3.21113	2.72025	0.534921	13.6619	0.694041	5.62605	10.3932	0.747923	0.320218	0.706611	9.17519	0.41076	17.6294	6.90542	1.62951	9.41445	4.00215	4.79614	1.11811	1.62938	11.8522	4.22417	0.742843	1.10629	6.93184	5.9043	2.87205	1.22486	2.43369	2.68956
TCGA-P5-A737	1.01918	0	3.10719	2.12838	3.33252	3.02756	2.02459	0.948861	10.8565	0.90882	1.20436	5.55936	0.660724	0.345852	0.0966182	17.3567	0.0734522	11.6717	5.73996	2.17311	7.42073	1.96568	2.90529	6.68135	3.7045	13.7171	1.79107	1.28207	2.04653	11.4101	3.14889	2.57989	0.399377	2.24998	4.78334
TCGA-QH-A6X8	1.39452	0	3.61507	2.4935	9.99784	3.92637	2.01038	1.82924	12.9883	1.15397	1.80169	9.02171	0.537472	0.509316	0.144759	8.87158	0.148346	6.51746	2.84018	1.65289	3.88364	1.92846	4.37813	7.6063	3.66861	11.7416	1.84352	0.989784	0.345002	9.5038	2.75411	2.39239	0.943582	1.53397	4.06394
TCGA-DU-8166	1.4137	0	4.82163	3.48935	6.43833	2.02415	3.34101	0.339794	19.1656	1.7939	0.948653	5.22014	0.781704	0.118725	0.259572	9.71123	0.158044	16.1522	2.05713	2.486	2.34801	3.69795	1.97523	3.01258	1.88879	8.7679	2.40992	2.20557	9.42189	8.07276	1.85699	2.59448	0.342005	1.06073	7.54377
TCGA-S9-A7IY	1.9589	0	3.75947	2.26718	8.70237	3.40033	1.54801	1.68751	10.2973	1.66112	1.3598	12.0735	0.530968	0.642212	0.218871	9.81153	0.149574	11.1044	3.9725	1.65545	3.2597	1.85312	1.00748	3.35784	3.09959	10.8998	1.75138	2.67348	0.794159	8.56971	1.51641	2.83094	1.28026	0.933999	7.08523
TCGA-HT-7481	4.93151	0	4.48797	0.951405	17.912	3.18706	1.55275	0.8426	17.8433	1.81425	1.59118	7.03526	0.329288	0.393803	0.688783	8.93434	0.283702	19.6852	1.56191	2.00275	4.0656	2.0975	5.13177	4.27729	2.40503	11.0676	2.19358	0.790619	1.35041	10.7873	2.27313	2.16774	1.9839	0.843691	4.70103
TCGA-DH-A7UT	1.11507	0	6.8468	7.50228	10.7626	3.48502	3.4923	0.538022	9.71501	1.11432	1.26818	14.9055	1.35859	0.622254	0.206586	11.1885	0.24543	5.64688	7.8212	2.27066	9.19701	3.4616	1.08373	2.85128	2.32156	17.3543	3.51389	2.84259	2.09944	5.91601	0.255201	4.19997	1.17677	0.398859	4.42503
TCGA-FG-7636	1.49041	0	6.18125	2.33743	1.97841	2.62393	1.90812	0.815564	15.7462	1.04385	0.913204	6.42427	0.237979	0.281577	0.190643	15.8385	0.0843284	10.9516	1.30247	2.62651	1.89018	2.85476	0.754634	5.74969	2.16447	6.38744	2.30141	2.37534	0.598302	7.41635	1.63946	2.57744	0.402226	0.734958	4.43096
TCGA-DU-A6S8	1.85753	0	4.61763	3.88809	1.5582	6.28233	3.48906	1.47968	8.51201	0.591477	1.98311	6.15691	1.79903	0.341649	0.105452	23.3082	0.0987787	12.1056	2.54559	2.44873	13.392	2.72487	3.07221	13.6027	2.59043	24.6431	1.91823	0.826266	2.4504	12.1191	1.34637	4.39612	0.608436	5.163	1.4179
TCGA-DU-5874	1.26301	0	3.25593	2.56955	0.768396	4.68014	3.30458	1.25843	15.0892	0.5292	4.04222	5.12081	0.791009	0.408217	0.0505746	15.8069	0.122615	17.2577	2.14632	2.53588	4.31944	2.5341	2.14795	6.48054	3.0583	17.5499	1.59566	0.330165	2.25983	11.5908	1.43897	3.32515	0.159864	2.54765	2.03664
TCGA-HT-8018	3.15616	1	6.74517	1.95378	1.91762	2.14688	1.1239	0.496345	19.4143	1.45387	1.9485	7.4399	0.321326	0.452284	0.960584	6.12052	0.364622	17.6376	3.91189	1.24445	2.51042	2.66564	6.80903	1.39696	1.24418	9.37327	2.89045	2.17258	0.905523	4.9022	2.3531	1.13959	2.16698	0.393717	2.5253
TCGA-DU-7012	0.545205	1	9.49146	1.08063	2.91309	2.67387	2.64194	0.181169	6.5431	6.69581	0.384608	7.54968	0.357936	1.12416	1.55029	3.43555	0.570637	10.4707	3.09996	1.84009	0.373988	2.85295	0.617851	0.519341	0.132692	6.06692	2.46899	3.42413	0.151489	6.52056	0.215449	1.43679	5.35971	0.0356328	2.22492
TCGA-FG-A6J1	1.36986	0	4.55094	3.32239	2.48394	3.7365	1.11805	1.11115	4.96008	0.570707	2.83137	16.682	0.958376	0.190387	0.203499	31.2908	0.259937	7.73658	11.8302	1.87046	7.27471	1.66827	2.54487	8.18182	3.44846	17.0667	2.74812	3.36485	0.252001	7.74843	3.30288	3.97534	1.15662	2.53899	2.82507
TCGA-S9-A7IS	0.660274	1	4.87621	7.07307	3.98206	2.86745	2.86096	1.34321	10.1746	0.587673	0.797116	12.4306	0.828922	0.460878	0.0462517	7.56193	1.14707	11.5236	5.99481	5.02431	2.00624	3.08304	1.60944	8.20394	1.33394	6.28246	3.89608	1.13049	1.32359	6.96099	0.276088	1.55737	0.184356	1.62345	0.64728
TCGA-DH-5143	1.2	0	3.17499	1.43098	3.28326	1.45832	0.872957	0.783413	17.7025	1.34948	0.900846	4.37027	0.0686478	0.330137	0.250906	8.84696	0.382054	10.8617	2.89299	2.05909	0.380219	2.20431	1.83115	2.94576	1.66876	6.53611	3.48045	2.28869	0.429632	6.44787	0.948745	2.28499	0.376495	0.236741	4.44188
TCGA-P5-A733	1.13425	0	5.6395	3.01787	1.41724	2.52522	1.60117	0.768025	18.4974	1.16851	0.643452	11.2415	0.57536	0.181442	0.298462	6.85991	0.184023	12.8754	2.51918	2.0417	1.515	2.90055	0.476636	2.32468	2.2367	10.3464	2.31339	1.32773	0.690207	9.4189	0.516642	2.0173	1.46796	0.675805	7.14663
TCGA-DH-A66F	1.43288	0	4.33819	2.24727	6.9153	3.62546	1.74677	2.82024	12.2268	1.87085	1.12491	5.27167	0.819723	0.382806	0.150219	12.54	0.637896	12.6062	2.2989	2.08676	6.16733	2.07652	2.34207	4.09111	4.8481	10.7405	1.78128	0.416785	1.43065	11.863	1.77166	2.84578	0.292729	1.79141	7.88148
TCGA-DU-A5TP	2.7726	0	7.60666	11.2608	1.16245	3.49338	2.86049	0.582226	11.5457	0.901674	0.67071	7.97073	0.608336	0.891603	0.181642	19.0753	2.06943	8.37394	1.88871	5.4303	2.51682	5.21932	0.663309	3.48059	1.67909	8.88913	1.74324	6.32351	2.37133	7.23294	2.25508	2.16652	0.366258	1.5622	1.66113
TCGA-HT-8105	0.520548	0	5.30555	2.72913	3.53805	4.29186	2.86125	0.93593	22.4289	1.04193	1.20818	4.11639	1.13374	0.559506	0.304977	31.7544	0.397644	24.14	1.7951	2.60354	10.3344	2.68394	4.68663	6.34307	5.27167	22.964	2.83884	0.635397	1.48234	10.1031	3.12326	3.21138	1.25371	4.04142	3.39643
TCGA-CS-6668	0.668493	0	2.58614	1.27392	3.65746	2.93959	3.62193	0.562546	24.4193	0.658542	1.12659	3.37217	0.416511	0.20884	0.115904	19.7328	0.0789592	19.7694	3.57055	3.64944	7.51166	2.04331	4.22555	11.0856	2.51438	12.5238	1.78824	0.205723	2.07131	13.3788	2.15246	2.74347	0.370211	1.83064	2.76875
TCGA-HT-7483	14.3973	0	5.54752	1.98588	3.78085	2.0634	1.34894	0.572088	16.8343	0.729054	0.610647	4.3316	0.21571	0.427454	0.123431	8.81103	0.563784	17.4166	1.81185	2.18483	0.552675	3.41011	1.60547	3.98156	2.44604	9.88956	2.88728	1.03826	1.63896	10.5394	0.419749	1.51795	0.590387	1.14566	5.9395
TCGA-HT-7694	0.575342	0	3.76698	0.948593	13.8496	2.33412	0.916809	0.794255	27.5741	1.41755	2.01592	3.3731	0.277037	0.239272	0.738715	8.69841	0.372216	34.5143	2.18338	1.18922	3.17844	2.3145	13.6863	2.3776	1.76707	9.67046	2.31527	0.513127	0.548729	7.484	4.34363	1.3884	2.68658	0.319417	4.95478
TCGA-HT-A614	0.224658	0	9.00918	5.17175	8.62725	3.3119	2.26185	0.464736	10.9188	1.11123	1.07984	6.91417	0.583068	0.407463	0.250399	7.29543	0.28868	9.66137	2.47397	1.42956	5.70977	3.05002	0.936886	2.4339	3.61428	36.965	4.27549	2.21187	1.37361	4.79928	1.31701	3.00824	1.5028	1.36136	5.40175
TCGA-IK-7675	1.58356	1	5.15826	3.60996	2.44248	3.61948	3.43306	0.146269	11.2948	0.575954	0.658677	7.33763	0.464802	0.651615	0.0841832	3.461	0.169843	12.5261	3.25617	3.4679	0.171626	5.23095	0.140263	2.92619	5.60632	11.7217	4.7069	0.728651	1.93023	11.5102	0.00819948	3.11253	0.234215	2.07372	6.02778
TCGA-DB-A64S	2.28767	0	8.08268	4.1856	4.08193	3.29246	2.67217	0.647661	9.86169	0.761953	0.899761	5.25274	0.98136	0.775145	0.131811	10.0037	0.482118	10.3816	1.90398	1.71556	2.13729	3.42727	0.429331	2.27594	2.84533	13.5169	4.00893	3.91834	3.53064	8.37434	0.0715286	2.82889	0.214048	1.62609	4.06187
TCGA-FG-A6J3	1.85479	0	12.159	5.18155	2.87413	2.10965	0.324363	0.563944	2.00503	0.401512	1.5546	18.6708	0.282682	0.683172	0.202363	5.74772	1.35999	3.95196	10.5337	1.55459	0.438614	1.60403	0.252667	1.87942	1.03837	25.5149	2.62798	10.5236	0	4.06571	0.183024	1.55806	0.537738	0.193178	0.795926
TCGA-DU-6397	3.83836	1	4.84267	1.71212	2.02795	3.87173	2.96941	1.37432	9.57176	0.838824	0.965666	3.66032	0.535273	0.518085	0.134753	19.3821	0.773757	14.3793	1.35052	2.86518	4.79985	2.20223	2.55055	7.4645	2.84605	20.6258	1.48293	0.306951	2.17034	10.0647	0.647274	2.75704	0.316265	2.20572	2.70458
TCGA-TQ-A7RF	1.78082	0	8.56568	9.28508	0.178316	3.12225	3.53747	2.2751	6.5938	0.36685	0.940043	17.3057	1.48021	0.691044	0.119036	11.3147	0.377394	11.1555	4.65432	2.34399	1.06041	4.75131	0.393189	2.94291	0.737171	8.85988	2.86576	1.45374	2.11306	8.27711	0.77681	3.54594	0.217635	0.92722	5.069
TCGA-QH-A6CX	1.01918	1	5.7494	3.9373	6.19614	2.29818	1.02846	0.505206	5.69365	2.85148	0.956118	6.15629	0.586818	1.14542	0.742486	3.17466	0.855996	6.63379	4.89857	1.10904	0.207567	2.40474	0.180307	0.277577	0.478854	9.98761	2.04757	1.8623	0.295709	6.32943	0.0778815	1.36651	6.04742	0.0496827	3.93935
TCGA-TM-A84L	3.40274	1	5.48695	5.46703	5.92063	2.92983	1.87603	1.41743	12.8234	1.61564	1.16877	15.0053	1.39455	0.82047	0.213441	8.14231	0.544498	8.34464	6.85056	1.42489	4.21782	2.04385	0.517712	2.76941	2.46361	14.4102	3.63562	3.43697	2.50352	7.94045	0.81653	3.3292	0.628853	2.72648	6.17946
TCGA-E1-A7Z2	1.09041	1	5.18684	2.24936	3.95971	2.69653	4.59055	2.66949	7.78196	2.76015	1.89029	16.3907	0.916842	0.0671882	0.257066	6.31745	2.56392	14.1865	6.62366	1.10003	3.85936	4.21947	2.93895	0.67589	0.163745	9.61074	3.85197	1.22835	0.258948	5.63113	2.06459	1.75057	11.4154	0.075507	2.66079
TCGA-DB-A4X9	3.86849	0	4.61037	3.23269	2.32606	2.80169	3.75492	1.07292	19.0844	2.39359	1.59802	8.3542	2.02918	0.37417	0.0738889	9.2597	0.408685	10.6566	4.15385	1.04612	3.75241	3.79002	2.37861	3.98693	2.92852	13.8343	4.315	1.6433	1.09953	9.3811	2.2855	2.46935	0.414505	0.80844	7.31138
TCGA-TQ-A7RR	2.15616	0	6.45472	5.85703	9.24948	3.74427	3.28689	0.534704	16.3342	1.20626	1.21268	11.9305	1.16308	0.474549	0.211572	9.29557	0.208345	11.1378	6.49344	1.76844	2.54582	3.77002	1.45953	1.7659	2.91274	21.546	4.08312	2.59639	3.52096	7.09937	0.700645	4.03494	1.23614	1.54345	4.61417
TCGA-DU-5847	1.50137	0	10.6308	6.60799	1.9094	6.10563	2.57953	2.62039	2.59448	4.0005	0.587567	16.0333	0.968954	1.53375	0.968723	4.07119	1.00824	13.7236	5.90557	1.68622	0.586763	5.54021	0.276089	0.631148	0.161515	9.9954	4.52421	2.95287	0.149272	7.87571	0.102217	1.06285	4.7615	0.300043	2.17567
TCGA-HT-7609	3.83288	0	5.66415	2.2126	4.25661	2.5278	1.72092	0.930962	19.6634	0.432603	0.494471	6.97494	0.432016	0.34825	0.0622952	15.3155	0.164252	9.94114	1.58891	2.59936	0.474572	3.27322	0.284068	3.76471	2.48616	8.40435	3.09245	2.31519	1.3089	7.25452	0.420685	2.29927	0.314724	1.22747	5.08419
TCGA-E1-A7YI	0.30411	1	7.81881	6.65651	2.07288	4.42591	4.53989	0.394072	9.067	0.727464	0.471421	8.39559	0.617328	0.362926	0.0996453	5.63866	1.06476	11.1298	7.3423	3.8905	1.36087	4.77042	0.277681	4.19709	1.70956	13.5722	3.35631	0.978444	2.49585	8.60215	0.196267	2.71041	0.213573	1.18754	1.28453
TCGA-DB-A4XB	2.51781	0	7.565	3.09884	3.98349	4.33359	3.79064	0.663049	15.5252	0.940843	0.877695	5.78911	0.762177	0.147691	0.205481	14.233	0.131984	20.6262	3.14462	3.14665	3.572	3.58258	3.06534	7.91845	2.57411	11.3695	2.26349	1.26691	6.54827	8.46649	2.17066	2.72099	0.388284	2.35989	4.25822
TCGA-06-0171	1.09315	1	6.87128	3.37584	2.15556	3.25366	1.76801	3.72534	2.79141	3.19749	0.641448	5.19749	0.341384	2.91575	2.48058	2.9535	0.226105	8.7016	3.70524	2.16719	0.155349	2.43462	0.802111	0.211617	0.124039	6.38298	2.24067	11.5716	0.444439	3.49858	0.341404	0.872242	1.96634	0.0356385	1.55966
TCGA-26-5133	1.23836	0	10.5807	3.13748	0.322124	3.65336	2.52451	0.49351	4.13187	1.51838	0.852767	29.5434	0.640405	0.454505	0.221848	3.55709	1.32766	9.17572	6.51735	7.13988	0.527257	9.71528	0.0526893	1.72666	2.41571	12.018	3.36468	1.58154	0.399964	5.0148	0.105339	1.89367	0.0382092	0.974043	3.27769
TCGA-76-4928	0.257534	1	8.88336	3.85794	0.742895	2.74164	1.35189	4.8336	1.6752	2.34523	0.463743	10.9864	0.667816	1.90231	2.11922	4.36825	0.314685	6.38496	3.65971	4.02195	0.155112	4.36316	0.0314779	2.39873	0.0512988	7.51358	2.86884	5.13392	0.143811	3.09247	0.0611842	1.14957	0.927353	0.0887069	0.66563
TCGA-06-5856	0.312329	1	13.0206	5.20875	0.810001	4.34074	2.15653	3.88969	6.35615	2.82673	0.516499	42.9525	0.671235	1.47196	0.920642	6.14265	1.61791	8.94838	11.8004	4.21104	1.00924	4.59963	0.520127	0.63784	0.0504547	17.3374	3.23352	4.21955	0.522259	7.91942	0.0515807	1.82161	1.44812	0.339217	1.69642
TCGA-19-2619	0.805479	0	3.27932	3.01145	1.77045	3.00911	4.31412	5.41738	3.78894	3.86732	0.618059	8.8831	1.35899	0.356862	1.52051	3.6463	0.471362	8.34676	3.88749	2.26433	0.292717	5.04378	0.135142	1.0766	0.0719142	6.65245	3.41957	1.18025	1.69813	6.43451	0.101089	1.57638	1.94254	0.078344	1.22682
TCGA-QH-A6CW	1.13425	0	4.5439	4.99787	2.04448	2.33236	2.72928	3.96971	13.8539	0.521041	1.20145	4.67449	0.488129	0.622981	0.039543	11.1151	0.548747	6.60443	2.25732	1.95265	3.22507	1.60228	0.1703	4.15183	1.64344	16.8455	3.49751	1.62537	2.01375	6.37117	0.467316	3.67005	0.326907	1.67124	3.59525
TCGA-E1-A7Z6	2.69589	1	5.004	3.48393	1.66713	2.77726	2.2247	1.47601	16.185	3.8178	0.637379	7.60306	0.712697	0.150296	0.0780415	7.86205	0.29754	12.9956	4.26544	1.17194	2.19143	2.07695	0.396454	1.196	2.6149	4.81511	3.80996	1.71576	1.55345	8.003	0.728123	2.97315	0.356546	0.392704	8.71346
TCGA-S9-A6TS	5.18082	1	7.61578	4.98221	1.24882	3.52522	1.6605	1.2344	9.23573	0.601294	1.68731	16.1575	0.543917	0.784271	0.294519	7.29118	0.256984	10.14	3.66047	2.01178	2.05953	3.34583	1.481	2.27195	2.34859	21.1057	4.57952	2.76736	0.685346	8.72003	0.817364	2.34979	0.70043	2.70426	5.02179
TCGA-FG-5965	2.68219	0	7.48191	2.43678	6.93372	2.76119	1.79691	0.844305	14.2761	1.71687	1.52595	3.2606	0.636088	0.471475	0.570802	8.26928	0.736539	22.4219	3.07832	1.73362	6.71815	3.31328	5.91913	2.39207	1.83341	11.3925	2.75178	1.26593	1.72488	5.65873	2.68078	1.9807	1.91072	0.358544	3.71883
TCGA-S9-A89V	1.5589	0	6.59627	3.20101	10.1335	4.18123	5.02157	0.869603	13.5664	1.42258	0.512439	6.76258	0.818376	0.363187	0.85105	10.017	0.172915	28.5618	3.51644	2.31641	25.6526	3.37423	0.63133	2.77406	0.897734	7.86871	2.81203	2.20308	1.64446	7.52103	0.732152	4.12434	6.00058	1.2433	4.79939
TCGA-TM-A7C5	4.10959	0	2.49314	2.78285	6.07424	2.83331	2.6817	0.31492	9.75669	0.491546	1.18163	6.15899	0.813633	0.313155	0.0547726	21.936	0.123135	9.8482	1.49683	4.00673	4.95458	2.11346	2.70579	7.49286	3.82615	18.574	1.49684	0.464345	1.29909	9.04537	0.929336	2.45651	0.158484	3.20959	1.56973
TCGA-DH-A7US	1.09315	0	4.42878	3.61238	13.2306	3.68095	3.04595	1.24909	10.2248	2.06993	1.56974	11.7874	1.282	0.39747	0.0947997	14.3275	0.152934	9.67203	4.79276	1.88888	8.45242	1.7725	0.555373	6.22819	3.96278	18.9691	1.97976	1.03504	1.8737	9.04088	1.54046	3.61964	0.424516	2.44457	5.92721
TCGA-41-3915	0.986301	1	15.2482	5.80289	2.96517	5.52765	2.70111	8.27935	2.39835	2.41848	0.474186	17.5855	0.625583	1.40658	0.962434	4.83747	0.462321	6.45723	11.8901	4.1558	0.380615	5.11099	1.1383	1.1107	1.87622	11.689	4.29438	5.54774	0.365054	5.03237	0.115374	1.16164	3.43686	0.105382	3.20293
TCGA-P5-A736	0.630137	0	4.36145	2.89968	1.80756	2.592	1.09659	1.22198	16.9893	2.45727	0.875441	7.92776	0.35245	0.854319	0.317094	4.18504	0.211581	8.04211	4.22594	1.20847	0.335362	1.57258	0.419263	0.811388	1.40957	7.19211	2.76819	4.66673	0.445511	4.79803	1.27602	1.57497	0.493768	0.0937768	5.07296
TCGA-DU-6394	1.86849	1	4.04787	1.42694	2.10083	2.90893	1.66077	0.418628	9.70923	1.14349	2.15578	4.02723	0.474586	0.170113	0.0275498	7.47213	2.11611	15.8447	0.180691	3.57028	7.03177	2.20812	1.93676	5.6002	2.21794	12.6029	1.39643	0.5478	1.44812	10.7097	1.59069	1.90678	0.0683272	1.11307	2.13369
TCGA-14-1825	0.635616	1	8.7831	3.85262	0.649239	5.17186	2.2614	3.25179	6.59058	1.37766	0.827684	22.0467	0.790718	0.965759	0.422292	5.00839	0.301384	8.46248	7.58368	4.24953	2.79804	7.91569	0.183397	8.70018	0.149439	11.4848	2.78764	2.11549	1.93356	7.93084	0.11458	1.75415	4.42627	0.403124	1.88884
TCGA-HT-A74K	1.27945	0	4.58457	3.83849	5.06846	2.97957	0.431266	10.7027	5.08069	0.293217	1.37096	10.3512	0.524701	0.67855	0.168133	18.1625	0.3891	4.25877	3.45957	1.64829	2.10838	1.8983	1.24024	5.62379	2.10694	16.7832	1.78319	1.82936	0.0316992	4.45577	1.32744	3.03918	1.24689	1.30653	1.19684
TCGA-TQ-A7RI	0.169863	0	2.84182	2.86703	11.8259	3.64364	5.07506	0.83918	21.0277	2.35899	0.994871	12.0805	1.71369	0.46277	0.107128	11.406	0.421215	11.2449	2.12521	2.36993	11.2336	2.2899	1.74596	5.1989	3.08615	16.5484	1.6467	0.80117	4.04398	9.12453	2.60239	2.96464	0.647829	3.09185	6.78604
TCGA-DU-6400	0.10137	1	4.05322	1.81147	5.00901	3.04337	2.8266	1.20754	14.3115	0.641178	1.99195	4.97045	0.402234	0.288625	0.177224	20.6853	0.144209	13.0462	3.17008	2.32469	5.46441	2.24463	2.28976	9.58909	3.32582	16.7823	2.38416	0.525651	2.10857	9.81031	2.88323	2.31396	0.754767	2.8737	3.16075
TCGA-S9-A6WP	1.26301	0	3.603	3.45873	4.50573	4.25176	3.80789	0.867159	10.1669	0.854268	1.33302	6.79655	0.682709	0.949943	0.273456	18.7815	0.220483	11.3241	1.8919	2.13832	7.3911	2.03439	1.43112	7.23601	3.26689	18.4561	2.08032	1.3232	2.18559	9.53487	1.8233	3.44343	1.24481	2.74007	1.74468
TCGA-P5-A781	0.367123	0	4.17548	2.26671	10.447	3.33139	2.20547	0.631054	13.7174	1.78236	1.27045	7.02528	0.917957	0.259374	0.223171	9.50567	0.502628	11.1598	3.23937	2.10072	4.36337	2.26645	1.94914	3.89937	3.77914	15.6781	2.02452	1.4211	2.47419	10.9867	1.39901	2.44996	0.612474	1.64362	8.91367
TCGA-06-0210	0.616438	1	9.74923	6.88473	1.72966	3.15087	3.51811	4.4649	4.89771	4.28071	0.585259	6.35355	1.05369	1.43941	1.07106	4.73422	1.51724	7.85287	3.01601	3.50616	0.238524	4.58536	0.19347	0.84178	0.159307	6.8731	2.62762	6.87533	0.326649	5.70294	0.0406392	1.46896	1.181	0.107343	1.32532
TCGA-15-1444	4.21096	1	5.99421	3.07218	6.99933	2.27795	2.32249	0.366267	8.81874	1.28922	0.74742	9.94975	0.354434	0.715942	0.262093	2.86903	0.754704	7.91408	4.2179	2.73405	0.406882	3.3826	0.387318	1.68991	1.83951	8.4533	2.86056	3.93329	1.28339	8.30542	0.101403	1.67268	0.458931	0.770905	4.32958
TCGA-14-1034	1.32877	1	15.4846	2.81052	0.231252	7.27924	1.72547	12.3256	1.69411	5.54039	0.539337	9.06909	0.820559	3.91303	1.44321	4.08671	0.468863	14.4092	10.0911	3.99756	0.266578	7.98749	0.314457	0.169294	0.032285	6.24809	6.02052	2.51569	0.369659	8.47933	0.0825138	0.898243	1.97869	0.019694	1.78773
TCGA-06-2570	0.780822	0	9.44708	7.07699	1.82327	5.29272	5.97809	2.07801	6.81577	1.29448	0.841592	16.9178	1.18393	0.934033	0.304045	6.18314	0.300389	11.8389	5.65504	4.54584	4.72721	5.0098	0.541477	8.63875	2.4843	8.55991	3.37054	5.22515	2.54533	6.26161	0.172381	2.97291	0.422056	1.24562	1.73638
TCGA-DU-A7T6	1.49863	1	4.23162	3.34019	3.36055	4.77795	2.28657	0.985981	7.91384	0.664766	1.17749	7.12695	0.521361	0.311889	0.159108	12.954	0.220009	8.40915	2.45357	4.7528	8.6957	2.85266	1.7469	3.51213	3.11785	19.3809	1.36604	0.713847	0.163915	5.11602	1.74122	1.84755	0.73402	0.76235	1.08932
TCGA-DH-A669	2.51781	1	6.20374	4.68247	2.09013	4.36708	2.44288	2.53469	1.45573	1.26887	0.918603	6.93744	0.59209	0.755434	0.117696	15.7862	0.53836	7.26332	11.8499	2.96877	2.04148	2.97431	1.28286	5.86215	3.40778	14.2483	2.5499	1.25006	0.214665	9.9668	4.34509	2.52646	0.133606	1.52891	0.85234
TCGA-06-2565	0.567123	0	6.77705	2.952	0.0256748	4.93405	8.96208	2.50332	6.5491	5.05144	0.549101	9.64204	1.68857	1.26033	1.02705	3.80823	5.28736	11.8056	6.66309	3.46601	0.125084	7.39992	0.101537	1.33035	0.113762	9.69524	4.75791	1.35785	4.91094	7.36951	0.243174	3.63638	1.59633	0.0600888	1.86694
TCGA-06-2559	0.410959	1	12.3161	9.02927	2.02232	4.33875	4.0453	7.29292	6.8081	2.5217	0.508743	12.5441	2.25982	1.11681	0.808972	4.90016	1.72502	11.3531	4.09799	5.50689	4.27446	5.81127	2.06191	4.2683	0.0733145	10.4487	3.52951	1.54348	2.70352	7.24222	0.149901	1.98412	0.835985	0.0963505	2.888
TCGA-P5-A730	0.912329	0	5.625	2.22722	8.16969	3.30792	1.89617	1.19003	7.74026	0.457225	1.0714	4.85859	0.539793	0.754441	0.0579536	12.9107	0.144762	12.522	3.41116	3.68905	0.719182	2.09487	0.193121	1.66545	4.78161	17.6838	1.69852	0.199273	2.54332	11.3854	0.654786	2.55911	0.423828	1.61321	7.169
TCGA-HT-7478	0.531507	0	5.37952	1.68498	1.49879	2.08596	1.65206	0.101359	13.2523	1.74522	0.767714	6.24424	0.277276	0.543261	0.280739	5.98862	0.262009	10.7076	2.12456	2.83537	1.7206	3.05868	1.41148	1.25423	1.77296	10.5566	3.15546	5.56843	1.11733	7.00084	1.10158	1.71661	0.892656	1.28765	3.92294
TCGA-S9-A6WM	1.65479	0	6.80287	3.48175	0.455885	3.68742	3.93286	0.722177	9.77357	5.60293	0.6998	15.4787	1.53011	2.17636	0.97233	4.6218	2.35127	17.1689	7.29311	1.61818	0.119195	6.08281	0.176883	2.21633	0.0896815	9.99425	3.97631	1.49875	0.331535	8.38761	0.0654878	2.56339	6.2105	0.010634	4.84806
TCGA-TQ-A7RW	2.24932	1	8.37228	7.12458	4.33495	4.00947	3.55834	1.47498	9.12779	1.41676	1.03137	10.2538	0.940546	0.367601	0.251154	10.9463	1.21708	12.0919	4.50248	3.06729	3.32243	1.51931	0.179426	3.33918	2.42635	13.1526	2.3752	4.01839	3.3648	7.81507	0.597864	2.82155	0.332212	3.13451	4.12958
TCGA-E1-A7Z3	6.12329	1	4.60261	2.59849	6.1905	2.13319	1.90133	2.06393	15.1754	1.34718	2.21765	8.77301	0.923903	0.428384	0.488852	9.92353	0.479312	12.4207	3.99531	1.35227	4.99612	2.91798	2.88891	2.67318	1.74286	9.29452	3.06179	2.30984	0.995738	5.68188	2.44124	1.85379	2.83276	1.28223	4.28258
TCGA-12-3653	1.21096	1	10.5189	3.15333	0.0965688	3.65077	2.95519	0.621869	1.46483	5.41408	0.490321	10.8274	1.17613	1.75456	1.00275	2.74323	10.12	13.5254	3.45759	2.69781	0.0775499	6.19578	0.0613771	1.44197	0.0333416	7.74831	2.59466	1.43153	0.25884	4.89894	0.0170428	2.01319	1.47438	0.0138372	1.14792
TCGA-27-2523	1.33973	1	7.08071	2.23796	1.08617	3.10966	1.97054	3.55003	2.82222	2.39866	0.720931	15.1212	0.410377	1.23831	0.560807	3.75939	3.00456	7.74969	5.83435	4.67532	0.133703	8.30657	0.149911	9.12627	0.0191613	10.8567	2.5788	3.15367	0.607414	7.26401	0.127328	2.27816	0.679453	0.433394	1.22729
TCGA-19-0957	1.82466	1	7.10921	3.4095	12.8103	2.93189	2.3154	6.09328	11.5825	2.34482	0.573621	4.21869	0.443817	0.646308	0.916194	5.02829	0.455435	9.02878	4.33489	3.07916	1.70706	4.26883	2.00233	0.300509	0.530686	7.62356	2.68258	1.50356	0.496722	5.38815	0.5079	1.53423	2.63781	0.342078	1.91221
TCGA-12-0619	2.90959	1	13.8824	5.10099	1.64822	3.43757	3.09918	4.42928	3.31721	4.46032	0.475494	8.02479	1.8192	1.68853	1.41869	2.93102	0.898005	4.71893	6.0426	4.5492	1.10916	4.09612	0.193902	0.95569	0	6.78934	4.17741	5.53542	0.210626	4.5835	0.0587362	1.08314	1.52598	0.0635844	1.25636
TCGA-DU-8168	1.18082	0	3.59598	1.5373	7.19093	4.56604	3.80668	1.31154	15.3395	0.749823	1.6069	1.97004	1.01053	0.345358	0.203001	14.0499	0.17624	18.4314	0.378861	2.16964	13.77	2.92963	1.47132	15.2058	0.619376	16.5999	2.02401	0.106845	3.12625	18.1268	2.62683	4.64514	0.67027	3.07186	2.43661
TCGA-P5-A5F1	0.490411	0	7.9614	3.54328	2.14439	2.89026	1.016	2.5777	9.10697	1.12977	0.908047	20.5754	0.516658	0.863333	0.140996	5.50999	0.352193	7.20113	5.71754	1.18451	0.235847	2.39015	0.214315	0.674671	2.97438	12.5639	4.03316	1.73864	0.320708	7.6594	0.334023	2.74518	0.479412	0.434848	7.16041
TCGA-HT-7880	0.443836	0	4.3351	2.4764	7.36402	2.03757	2.04528	1.20483	15.8679	1.62775	2.24687	8.04361	0.684057	0.221531	0.625486	7.32108	0.470104	21.1592	2.05724	0.932343	7.55842	2.54799	9.14147	1.25443	1.02837	11.0327	2.49187	1.03665	0.558847	5.43459	4.26836	1.73753	3.0431	0.523525	3.77025
TCGA-TQ-A7RG	1.6411	0	2.38396	2.49993	9.04886	2.96879	3.1834	0.452261	11.9779	1.47942	1.19274	9.16058	1.02954	0.51441	0.0609194	11.4008	0.374574	11.1802	2.66369	2.14509	6.85787	1.89192	1.83416	4.87872	3.09936	15.125	1.58352	1.0618	1.39681	10.3659	0.984974	2.77265	0.397092	2.77007	6.26129
TCGA-HT-7692	0.246575	0	4.78177	2.55218	13.6059	2.83251	2.68021	1.68229	9.53175	0.731175	0.98316	6.33742	1.52155	0.533141	0.0432943	13.1621	0.657189	12.2741	1.92944	1.37647	19.307	2.32542	2.08054	5.36093	5.21379	15.1976	2.2432	0.862406	1.52639	13.6941	0.708437	2.64099	0.234024	3.16694	5.77526
TCGA-HT-8558	1.14521	0	9.94736	1.01907	14.6233	1.74243	1.25768	0.3773	27.6433	0.614742	2.11372	4.54488	0.26558	0.110581	1.01864	7.21307	0.475073	33.1623	1.76186	0.802265	4.96264	2.74796	18.3278	0.274504	1.00613	8.7469	2.07258	0.586313	0.165309	4.38253	6.24495	1.20714	1.73887	0.152441	1.91454
TCGA-P5-A5F6	0.106849	0	2.86506	3.23866	0	1.50861	2.26443	2.13901	4.44672	0.322299	0.409867	4.86195	0.141619	0.377388	0.0979795	4.22608	0.0772874	8.80271	0.338221	2.08097	0	1.98981	0.838712	0.0141656	0.0255482	6.82345	6.59023	0.79487	0	1.87879	0.0261184	1.56534	0.0426321	0	1.50167
TCGA-DH-5142	2.52603	0	7.34673	2.53562	0.620123	2.55164	1.83448	0.583314	5.95937	1.37162	0.973911	7.43518	0.207235	0.320607	0.332029	7.37698	0.405472	8.02205	3.54881	3.38407	0.374101	2.58577	0.400946	4.35769	1.46218	8.10322	1.7612	7.02287	2.28209	7.63434	0.738065	2.38598	0.19062	0.849555	2.92526
TCGA-DB-5273	6.83014	0	5.48603	1.04123	2.41567	2.23136	1.01644	0.795187	11.9044	1.24118	0.767575	5.54416	0.0875125	0.366463	0.0934739	6.34711	0.471147	7.34451	2.88288	2.00589	0.20773	2.66686	0.192825	2.37513	1.09985	11.2601	2.96786	3.73065	1.14488	6.16354	0.22826	1.00158	0.482976	0.247102	3.72436
TCGA-DU-A7TA	7.0274	0	11.1333	7.01326	7.13561	3.27747	5.69925	1.41956	7.54899	0.599552	0.981179	9.98957	1.32998	0.855599	0.0731979	16.35	0.523129	7.8011	9.64613	2.72536	5.1452	5.63591	0.179255	6.75828	3.51561	23.3813	3.45845	2.00581	6.28226	9.01313	0.370734	4.1009	0.109261	4.55265	3.82124
TCGA-RY-A83X	2.5726	0	3.54317	2.32464	7.23133	4.77694	3.58101	0.750077	10.989	0.970217	1.12969	8.16225	0.97951	0.340339	0.0710268	15.1074	0.629412	6.87501	0.554577	2.17655	5.09002	2.54969	0.642629	4.77552	3.56912	21.096	2.28583	0.71423	2.6559	9.44154	2.60382	2.96526	0.601168	3.08416	6.7774
TCGA-HT-7610	4.67397	0	4.52029	1.69273	6.51334	2.04058	1.91221	0.424278	25.1215	0.880293	1.99556	2.63721	0.4781	0.149826	0.476233	7.36924	0.629409	27.0355	1.04667	1.44683	4.76765	3.09359	10.3258	4.54755	1.50426	9.61505	2.0801	1.00982	4.22379	7.51574	2.22698	2.17248	0.598894	1.49208	6.40822
TCGA-DU-A5TY	2.83014	1	10.1756	6.16883	3.86651	3.4374	3.78859	1.15841	8.43955	3.89229	0.717147	9.57302	0.989121	1.47727	2.12305	6.6041	2.04382	9.78194	6.35499	2.78276	0.436686	4.26104	0.320743	3.71448	0.309357	10.3012	3.59895	4.00263	0.579703	7.4455	0.109056	1.22372	1.41516	0.318755	2.64701
TCGA-P5-A72W	0.868493	0	9.271	5.88271	1.43764	2.78586	0.566889	1.76618	9.14822	0.367569	1.00582	6.98194	0.423967	0.796904	0.0838062	5.79617	0.115688	7.9905	3.76084	2.59542	1.03179	3.6696	0.0703978	3.78035	5.34294	17.9406	3.2561	1.89689	0.678589	4.45682	0.670206	2.48348	0.200558	0.607629	4.2329
TCGA-QH-A6XA	1.37534	0	5.16483	3.97651	5.8175	2.95028	2.25516	0.9615	15.7452	1.59865	1.31374	10.9178	0.543844	0.297974	0.109935	12.2271	0.233925	10.7188	4.22828	2.26917	3.81449	2.72449	1.31516	4.47391	2.3198	16.1343	3.05651	2.28449	1.50077	7.38179	1.37138	2.33556	0.546992	1.59899	5.5154
TCGA-S9-A6U2	1.96986	0	3.4485	1.34731	6.47427	3.15319	2.81188	0.794487	12.0086	2.2645	1.52804	8.54851	0.60897	0.22121	0.689706	12.0837	0.35717	8.99768	2.29857	1.88772	2.78167	1.94006	1.68121	4.18199	4.05246	11.9051	1.64526	1.19276	0.552646	10.7163	1.24606	2.37528	1.00826	1.98014	8.55961
TCGA-TM-A84H	2.53699	0	7.81757	7.09856	3.20183	4.68493	8.15604	1.62574	12.8615	1.07358	1.02369	9.57505	1.38184	0.491573	0.0788139	11.963	0.255036	13.4026	5.40414	3.81792	16.207	2.18374	0.743293	5.08774	2.52027	26.6045	5.47196	1.47989	8.08343	7.45494	8.08337	3.54326	0.385016	3.52086	6.21247
TCGA-DB-A64P	2.50959	0	4.89221	2.29472	9.1658	4.31151	2.16734	0.615479	11.1113	0.651418	1.25486	4.4394	0.568922	0.403772	0.123178	12.3476	0.446145	14.3311	0.942536	2.01455	2.45557	2.06531	1.21701	3.93633	4.85153	22.5693	1.77856	0.746806	1.39495	12.583	2.03799	2.08568	0.356415	1.89104	4.7258
TCGA-FG-8185	1.1863	0	6.45927	3.17633	3.21069	3.66136	2.93967	1.25239	14.4659	0.61489	0.915753	7.23211	0.586194	0.458389	0.0143169	12.7246	0.536435	12.219	1.90931	2.68509	1.13834	5.25901	0.117514	5.26212	1.90801	9.28997	3.88009	1.61538	2.5238	9.64823	0.123272	2.80305	0.319572	2.29313	6.61994
TCGA-E1-5307	4.8274	1	3.59417	1.10413	6.68722	1.7731	1.51319	0.818398	18.1789	0.833862	0.817071	3.51121	0.179657	0.278504	0.210347	8.6625	0.857276	19.1632	1.49256	2.36168	0.948288	3.96896	2.14556	6.41683	2.65099	8.7347	3.52764	1.65527	1.05268	11.4108	0.691557	2.02088	0.396607	0.637356	8.72169
TCGA-DU-7013	0.736986	1	7.70382	1.99724	1.63271	4.88415	3.92796	0.53017	10.7414	6.49526	0.601524	9.43867	0.954724	0.946968	0.572398	5.9328	3.395	10.9996	4.0737	4.02906	0.726948	4.78471	0.501668	3.96771	0.108605	6.89172	3.00783	1.76459	1.64724	7.98496	0.0925243	1.47228	2.38618	0.0525848	2.31313
TCGA-DU-6399	5.47945	1	7.34244	1.45728	3.88842	3.01672	1.98364	0.629994	14.8451	1.07321	0.502554	3.79515	0.201785	0.633738	0.0626799	8.17169	0.140087	11.8668	2.99309	2.16107	0.969367	2.84499	0.265765	4.45855	1.75696	5.16717	2.07617	2.50181	2.53763	7.73951	0.401005	2.28909	0.293182	0.973345	5.06687
TCGA-HT-7611	4.8	0	5.37748	2.67787	2.10788	2.89344	1.6529	1.16887	11.763	1.23592	0.73841	4.50015	0.28652	0.496924	0.110174	8.15652	0.351649	12.01	3.04428	2.40467	0.426712	2.40835	0.367494	1.76543	2.60027	9.36038	4.94174	2.20768	1.06917	7.65421	0.054251	1.92266	0.215055	1.18926	5.91614
TCGA-DB-A4XA	1.56986	0	4.83949	3.08646	3.99779	3.42947	2.73196	0.908713	11.9426	0.841129	1.61648	7.1215	1.00206	0.894374	0.267579	15.0712	0.475583	7.8801	2.53122	1.95301	3.2494	2.07409	2.95266	4.52328	3.88775	13.4954	1.5988	1.14216	1.25345	8.68054	2.04589	2.25342	1.35067	2.21124	5.57864
TCGA-DB-A4XC	3.89315	0	5.27163	4.03353	2.60382	3.70369	4.17844	0.59991	14.4594	2.1272	1.04564	5.05405	1.14164	0.508363	0.40012	10.1381	0.42834	13.9775	3.74896	1.72742	6.7184	2.99709	3.07955	4.16967	2.24975	15.5385	4.29951	2.31034	3.01269	8.04577	1.51186	3.14222	1.90332	0.972851	6.12415
TCGA-E1-5318	6.51781	1	4.09609	1.07449	2.06388	1.95062	0.996126	0.679405	15.7958	0.615749	0.54197	2.24643	0.119908	0.610218	0.010673	11.1755	0.071094	15.3249	1.08891	3.67452	0.840416	2.17806	0.470472	6.14713	2.55572	7.80439	1.33533	0.61967	2.81648	11.663	0.837885	3.2335	0.0294118	1.56173	4.28613
TCGA-DU-6402	0.586301	1	3.66233	2.05186	0.630078	3.00132	1.75416	1.48324	2.82477	5.16716	0.546768	8.61412	0.617742	1.39885	1.31862	2.94388	0.74475	7.36685	2.31836	2.45612	0.0177095	5.67582	0.0677452	1.41849	0.022842	6.04698	2.14355	3.29278	0.0689611	4.19665	0.00778391	1.11583	1.66441	0.0126396	1.84445
TCGA-WY-A85D	3.14247	0	6.42449	7.13493	3.46075	3.70097	2.66799	1.55765	11.5063	0.904314	1.48802	24.1249	0.889171	0.507743	0.106384	6.06488	0.161752	7.48153	5.66281	1.49238	2.02004	3.42867	0.147643	2.47763	3.63207	10.2176	4.94598	3.53625	0.177898	7.43751	0.573954	3.5885	0.315468	0.979545	7.48085
TCGA-DU-7007	5.24658	1	12.0901	2.52897	1.27625	5.55347	2.0067	0.590553	10.5291	0.552049	1.04363	6.09601	0.335332	1.01187	0.480377	3.40975	0.730223	8.29361	3.69649	3.73609	0.218506	3.59354	0.184947	1.0765	1.5031	48.7285	4.72333	3.28332	1.33707	4.63544	0.128054	1.36171	0.424567	0.432116	3.71034
TCGA-DB-A64X	1.54247	0	8.21866	5.47976	0.845143	2.84395	1.33786	0.586108	9.91046	0.479198	1.3375	10.7769	0.85399	0.518065	0.154041	10.5511	0.509268	10.3816	8.91452	2.21889	3.22119	2.85167	1.01577	1.96639	4.84831	15.2056	4.60834	1.25004	1.37951	9.63807	0.722824	2.89622	0.327733	1.36935	5.98044
TCGA-06-5411	0.69589	1	13.695	3.55458	11.8885	2.75835	2.16119	1.07427	7.70667	1.74265	1.36482	18.0684	0.499122	0.658039	0.971579	8.34035	1.23679	10.9981	4.24821	2.93951	4.02615	5.03057	3.84255	9.0948	0.435063	12.411	2.356	2.79358	0.455126	4.83679	2.29956	1.03882	2.51778	0.368797	1.84615
TCGA-06-2567	0.364384	1	14.637	4.27563	4.04834	7.93636	3.66334	4.06368	2.37366	6.64954	0.943958	10.179	1.39275	2.51434	2.98475	3.63881	1.01205	8.87273	7.43342	2.29467	0.267456	5.17179	0.479682	0.346753	0.0302604	16.6248	5.03298	5.69908	0.430687	7.80114	0.278421	1.00282	3.70298	0.117212	3.71996
TCGA-26-5139	0.131507	0	8.67912	5.09101	0.52208	2.61069	3.36537	3.57528	4.07412	3.54719	0.51702	15.5009	1.05204	1.05901	0.865935	5.92663	4.84656	8.21804	4.8594	2.76592	0.448225	7.42912	0.457514	0.330728	0.0229415	7.25953	3.06131	4.28976	0.697565	6.00042	0.164175	1.79732	2.03853	0.0142816	1.51567
TCGA-32-5222	0.452055	0	9.47182	7.10298	5.18255	1.45805	0.893582	2.06049	2.40585	2.62568	0.356046	14.9518	0.450151	0.690239	0.615392	4.31837	2.44286	8.69572	5.05594	3.6164	0.0587177	6.16396	0.199593	3.14405	0.0873864	8.11658	2.45795	5.58867	0.251261	5.86558	0.0992629	1.33487	1.89567	0.0120888	2.33704
TCGA-02-0047	1.2274	1	5.10979	4.58785	0.894174	2.55543	2.32001	1.39689	10.636	3.02919	0.678067	7.00711	0.388939	0.391906	0.939919	2.47939	0.87557	9.23735	5.1656	4.01105	2.54915	3.59505	0.781437	2.58193	2.17394	5.91346	2.74405	4.33035	0.765619	5.88646	0.21041	1.52139	6.22493	0.170833	2.05082
TCGA-14-0736	1.26027	1	26.92	1.94534	6.10063	3.15604	1.60569	3.84359	2.13573	2.68588	0.644706	23.3035	0.117317	0.788078	3.82191	5.98291	0.968369	7.7639	12.5848	3.39709	1.69665	3.85133	2.59516	1.44142	0.155203	10.2644	1.98931	10.3697	0.125509	5.46279	2.14199	0.610718	3.12401	0.0483083	3.00872
TCGA-06-5859	0.380822	0	9.54193	2.01447	5.34877	4.27977	2.0048	0.728873	2.01541	10.4145	0.357295	16.7885	0.730626	0.604504	1.14794	4.5692	0.61782	8.69387	8.50315	2.58778	0.295888	4.95348	0.160713	0.819458	0.00935393	9.76088	4.57738	3.27694	0.363086	7.40392	0.0478134	2.53202	4.34705	0.120342	3.47289
TCGA-27-2521	0.865753	0	8.57706	4.26217	0.396947	3.33656	2.5215	1.49746	3.76576	1.40636	0.795273	14.3262	0.354872	0.442852	0.144202	6.94079	1.01371	6.75717	6.84566	7.58789	0.0997004	7.82886	0.0594942	2.63703	3.02096	11.3638	1.96689	1.48605	1.34694	6.1684	0.313011	1.66449	0.238428	0.419324	1.86137
TCGA-06-0743	1.86027	0	11.5213	6.90854	1.61846	7.15874	12.4183	3.57602	2.58857	2.42933	0.900737	28.839	3.26085	1.75404	0.902326	3.69091	1.23966	7.35525	8.28534	2.34995	0.488692	9.11338	0.102866	1.75985	0.0894072	15.7281	5.68385	4.708	0.766395	4.8985	0.262782	3.4605	5.93042	0.0927629	1.6951
TCGA-14-1823	1.48767	1	27.3432	5.64945	0.104162	2.24238	1.05388	1.2637	2.18	4.4154	0.43806	10.9392	0.4863	0.58104	1.26469	7.36285	6.41689	11.6739	6.29513	4.94813	0.110601	5.27635	0.214548	0.418751	0.0839146	7.76255	3.04106	11.6877	0.253343	7.23834	0.100085	1.23375	2.7422	0.0522385	1.3361
TCGA-HT-7856	3.25753	0	3.19681	1.43843	14.816	2.41469	2.21438	0.94479	21.4703	1.43268	2.66169	6.34749	0.407132	0.326326	0.690156	11.0358	0.301872	25.2421	3.02406	0.962874	7.65417	2.31667	9.40158	2.3518	1.9693	10.7743	2.50301	0.646362	0.700009	7.41189	2.73595	1.5716	3.14772	0.682566	3.50607
TCGA-16-1045	2.41918	1	9.38631	4.88973	1.10727	4.04861	2.57119	2.27438	1.18759	5.03644	0.784718	10.9019	1.00121	2.19612	2.19338	3.63933	1.48556	8.71044	8.94637	3.27355	0.0943089	4.28286	0.551514	0.704434	0.121641	9.8192	2.63568	6.02165	0.507141	5.71063	0.0552691	1.40862	0.65405	0.00560917	2.76265
TCGA-76-4926	0.378082	1	10.6068	2.51389	1.53661	4.07646	3.23633	3.11662	7.89459	4.79919	0.80408	9.30855	1.01911	0.339467	1.68476	6.20923	3.76806	8.73776	3.93478	2.50682	1.50094	5.84547	2.08986	0.733954	0.119502	7.51315	5.15481	2.52824	0.475756	6.17406	0.460481	1.02017	5.54517	0.0152599	3.29318
TCGA-HW-A5KL	1.73425	0	5.05215	3.67775	4.65333	3.41066	3.34324	0.816529	15.9238	1.11363	0.931489	5.17594	0.809623	0.317844	0.0308848	11.3402	0.274837	10.3693	2.19445	1.77065	3.00284	3.30381	0.225925	3.80719	1.77876	13.9494	3.20451	2.24937	3.42751	7.44654	0.567045	2.86251	0.111706	2.17494	4.7638
TCGA-TM-A7CF	4.62466	0	5.57745	3.65058	10.9538	2.98309	2.28223	1.4245	11.8877	0.928462	1.98451	6.3057	0.801695	0.24667	0.313204	7.30147	0.162017	13.6963	3.81534	1.37772	3.53772	1.99686	2.67706	3.05432	2.53708	19.0306	2.3829	0.991083	1.68126	5.81541	1.34132	2.16634	1.37888	0.878261	4.20059
TCGA-S9-A6TU	7.26027	0	5.46911	5.46914	3.46901	3.74586	3.61347	0.913572	8.51967	0.699653	0.908812	5.28688	0.809697	0.722687	0.00831591	8.48023	0.238882	7.9702	2.18167	2.21747	2.01235	2.58684	0.290727	2.87829	3.90363	15.8546	3.04584	3.12762	2.07897	5.95408	0.263242	3.16358	0.197653	1.48327	2.60689
TCGA-HT-7602	2.48767	0	4.08638	1.72794	15.1426	1.85007	1.05926	1.04346	19.1723	1.36636	0.787379	6.31289	0.561958	0.272983	0.105724	7.49521	0.127785	12.7797	1.71489	1.15798	1.04143	2.24819	0.679095	1.51768	2.7034	10.1928	2.87726	2.6074	0.940055	8.03324	0.293647	2.00586	0.373579	0.455791	6.82347
TCGA-CS-5396	0.830137	0	2.15661	0.878301	2.89574	2.05396	1.83272	2.17131	7.50467	1.75192	0.635746	3.2155	0.189057	0.270792	0.0908711	7.92777	0.251062	12.3038	0.270908	1.78429	1.78964	1.72957	2.32511	8.55518	1.20053	7.27956	0.999209	0.500851	0.926711	10.3376	0.767077	1.17919	0.0796773	0.498236	2.63834
TCGA-S9-A6WG	6.67671	0	7.67735	6.69136	1.3576	4.82651	2.64398	1.34193	6.52892	1.06134	0.966949	8.57386	0.695324	0.601829	0.184211	7.31373	0.646388	8.42376	3.9314	3.23182	2.24905	2.4297	0.72334	2.69878	1.44499	6.94333	3.68535	3.62364	1.30735	4.83195	1.08849	2.32648	0.661733	1.02804	3.10368
TCGA-S9-A6WQ	1.1726	0	5.69661	4.26499	6.91474	3.94808	1.51762	1.20464	11.8381	0.92158	1.42423	18.1274	0.505872	0.63551	0.219993	11.9146	0.197635	7.50555	7.93157	2.08576	3.54459	2.9657	0.900511	3.33963	3.16454	16.383	3.70253	3.00427	1.65761	6.44366	2.18935	2.49443	1.02901	1.2062	2.73412
TCGA-HT-7606	1.4411	0	6.50809	1.89115	2.5472	4.86689	2.24034	2.37919	13.1858	0.414414	0.851624	5.11265	0.448573	0.314899	0.0403007	4.54718	0.176168	10.6863	2.16596	2.48658	4.78712	3.29413	0.298631	7.59251	0.224618	13.2234	2.04503	1.34592	4.0365	10.0147	0.561319	2.61738	0.0902338	0.334899	2.95195
TCGA-HT-7470	0.734247	0	3.88237	1.37483	9.06899	2.14863	1.28868	0.332364	18.8749	1.63318	1.46911	4.58899	0.157148	0.22621	0.458599	6.30117	0.415538	16.9976	2.4246	2.03546	1.11217	3.30703	6.02766	1.23506	2.32399	7.19092	2.82787	1.36294	1.02794	7.49012	2.1026	1.80517	1.30093	0.34512	5.53871
TCGA-HT-7468	0.556164	0	2.93967	1.21745	7.02825	2.8989	2.72609	0.399362	13.3493	1.58351	0.798419	3.96143	0.442479	0.473474	0.228991	11.1904	0.129287	8.06913	2.70889	2.4341	1.44226	1.70036	1.26592	9.06497	3.65987	4.64595	1.72162	0.947691	0.532863	11.056	1.09625	2.18768	0.252846	1.42538	7.91019
TCGA-12-1597	1.84932	1	9.8743	4.68716	9.16807	3.65686	1.60911	8.16091	5.13308	0.931403	0.654677	9.52776	0.34548	0.645597	0.221409	5.86943	0.718976	8.47236	7.92637	2.86834	3.30399	5.62714	0.534264	2.90418	0.205672	7.67992	2.49184	2.90087	0.35482	4.9835	1.48585	1.99966	1.18977	0.13088	1.83301
TCGA-06-5410	0.29589	1	10.4341	3.92784	4.951	2.07329	0.653797	3.35722	1.85925	2.98927	0.597695	8.51721	0.296857	1.98848	2.23689	3.8448	0.292372	6.66843	3.69622	2.85028	0.0984805	2.38305	0.401009	0.326628	0.322156	7.6943	1.65169	20.659	0.0714567	2.75868	0.432854	0.559863	1.07516	0.0305597	1.40179
TCGA-32-2638	0.613699	0	6.62986	3.70485	0.18361	3.69094	3.83725	2.28494	3.09418	3.18001	0.661715	9.05876	0.847183	0.961189	0.675226	3.83961	1.48442	7.65952	4.74494	2.6824	0.289794	5.66605	0.235642	0.86117	0.0768041	6.64751	4.22683	4.42867	0.629377	5.44223	0.113415	2.0778	2.34252	0.148749	2.02227
TCGA-14-0790	1.14795	1	9.53354	3.08538	1.68713	2.87765	6.31593	0.779	4.28977	3.50347	0.504971	22.6918	1.93438	1.23521	1.40173	3.05168	9.28346	9.91195	8.43442	2.98335	0.022228	9.18799	0.185698	0.6182	0.0637111	8.58888	4.22162	1.03075	0.247304	6.67857	0.0325665	1.91496	3.24258	0.0132205	4.90084
TCGA-14-0787	0.186301	1	12.386	7.20735	0.143404	6.5192	2.99698	3.53382	2.53197	3.49782	0.906844	31.3446	0.759744	1.07192	0.636607	3.62927	15.5086	8.98453	8.41183	3.28315	0.475615	6.68588	0.297739	3.26688	0.0519877	10.8694	5.22769	5.03572	0.336329	6.65308	0.265739	1.59957	7.48953	0.0934941	1.26314
TCGA-06-0644	1.0274	0	10.1661	1.4807	0.443022	2.0022	1.16034	4.80096	1.36976	2.36773	0.565142	17.98	0.333548	3.70242	0.805537	3.04102	0.348446	5.94654	3.77991	3.96769	0.0271679	2.69174	0.0836194	0.226676	0.0292013	4.84802	2.08532	4.45178	0.037783	2.34809	0.149265	0.630145	1.11262	0.0242378	1.09293
TCGA-06-0744	1.63014	0	8.71699	7.7037	0.930126	4.43058	10.6496	1.63984	4.93052	1.26524	0.897303	34.9304	3.79493	0.954673	0.680616	6.88728	5.49703	8.31708	9.72152	4.24684	1.26009	9.30365	0.206909	0.685532	0.101158	12.3311	6.00449	4.22437	1.33796	5.27818	0.34472	1.20941	2.19443	0.0373174	1.2202
TCGA-06-0749	0.224658	1	11.4387	6.6539	7.52832	4.25853	2.24901	1.49518	3.96216	1.68468	0.955936	23.5001	2.32346	1.12402	1.074	9.16481	0.767314	6.02094	8.60612	1.9133	3.30376	5.37943	1.70167	1.62514	0.259281	9.59523	2.84341	5.89234	0.233376	3.80059	0.806726	2.32372	9.41505	0.0608202	1.90914
TCGA-19-2620	0.405479	1	5.98571	4.27988	7.69444	2.75275	2.69306	4.10787	8.14109	3.51177	0.65548	13.0237	0.829463	2.02077	0.494822	7.0927	0.979986	7.82111	4.71355	1.84097	0.610922	4.52417	0.311599	0.330107	0.192616	9.74856	3.1983	2.84385	0.203909	6.4923	0.161112	1.07131	7.39259	0.0508698	3.49232
TCGA-32-2616	0.613699	1	11.0083	3.46138	0.43211	2.61892	2.2167	8.32043	1.42867	5.14226	0.4464	10.5348	0.739289	4.29281	1.84363	3.36678	0.639381	3.69826	8.41236	3.03057	0.0732571	5.32376	0.0890037	0.294122	0.0248652	6.48442	4.43539	2.24866	0.139415	9.82989	0.0254202	1.6908	0.380347	0.268304	1.86643
TCGA-08-0386	1.50137	1	13.2049	4.13303	1.79825	6.27402	3.55247	9.07845	4.09462	8.1622	1.20584	11.3252	1.36201	3.61317	2.47024	4.63412	2.19127	8.57271	5.00934	2.73101	0.512976	6.31444	0.407986	0.803254	0.064867	5.29317	4.20666	1.43963	0.363697	6.42671	0.342625	1.27865	6.50359	0.0538413	2.23331
TCGA-VM-A8CA	1.12603	0	5.11165	2.99004	3.27392	3.60846	0.505822	0.850966	7.6614	0.641734	2.18528	17.7214	0.58706	0.617629	0.451663	9.58293	0.360563	7.37925	4.07193	1.31199	2.66133	1.82443	1.67741	1.44536	4.76368	9.20602	2.74035	2.35414	0.0746202	6.36082	2.33476	2.88837	3.14692	0.268066	5.41653
TCGA-06-0211	0.986301	1	6.87127	3.97722	0.0890785	3.75959	3.44772	3.31598	3.40472	2.54636	0.459781	13.4826	1.17859	1.26916	0.725515	3.50936	2.99828	8.43318	4.03952	4.24758	0.860231	7.69848	0.290025	0.534598	0.0425945	4.53455	3.84825	5.12326	0.901437	5.46517	0.149137	1.38681	1.40454	0.125044	1.10464
TCGA-FG-7643	0.80274	0	5.03247	1.35207	11.1573	0.94377	1.21239	0.466802	20.6452	1.69663	1.69313	6.60125	0.312151	0.401057	0.571569	6.47532	0.575957	26.9412	1.70398	1.3538	2.29024	3.17681	7.77964	0.624466	0.563122	6.02142	2.29792	0.72083	0.16654	6.17466	2.76331	1.14603	3.82583	0.0600951	4.52882
TCGA-DU-6404	11.1452	1	4.58772	2.9764	0.305543	4.81482	3.94311	5.53114	5.29185	2.56548	0.846649	10.9003	0.828133	2.55193	0.407154	7.15399	0.954266	9.3284	5.37978	3.62394	2.00668	3.9189	3.39787	0.182509	1.16132	5.5226	4.23143	0.97723	0.0302449	4.51206	2.13407	1.06666	7.71762	0.7535	1.37421
TCGA-TM-A84F	4.92055	0	7.77948	4.44444	6.73402	2.61479	2.07931	0.74096	9.14099	1.5095	0.917862	12.9306	0.865775	0.685901	0.271802	7.30017	0.292645	7.91309	5.0714	2.76996	2.65143	3.35904	0.908202	2.36863	1.84574	12.2575	3.25215	5.61978	0.750997	6.215	0.723918	2.00058	9.23023	0.602207	4.42876
TCGA-P5-A731	0.750685	0	6.79163	3.22876	5.66938	2.23134	1.30064	1.12618	14.5606	1.40624	1.14536	8.64057	0.889999	0.519618	0.278137	6.87857	0.425662	9.11791	1.71288	1.29182	3.04703	3.17612	2.14661	2.31363	1.73701	12.4962	1.82573	1.37673	0.364117	6.10335	1.4484	2.20738	0.461498	0.426891	5.58638
TCGA-E1-5304	3.4274	1	10.0243	3.01626	1.95141	4.38847	4.68041	0.811271	10.333	0.410034	0.776133	9.73131	0.455604	0.292572	0.116643	8.44093	0.0469941	15.7877	7.69143	5.73239	0.225463	5.11018	0.0714916	7.19385	2.55386	15.9982	4.32644	0.423385	6.80174	4.90022	0.238217	2.35724	0.287736	0.352006	1.62764
TCGA-E1-A7YQ	4.32329	1	8.93622	7.08701	2.69728	4.54853	4.32578	2.44985	4.62281	4.99809	0.617066	9.75552	2.89238	0.684308	0.617627	5.13944	2.24708	16.0947	8.89004	2.45505	0.287334	4.59812	0.393597	0.537434	0.342099	4.82945	4.19346	6.04319	0.823793	10.3003	0.0582889	3.98521	2.63229	0.646778	2.13988
TCGA-DU-A7TB	4.29315	0	3.49665	2.36268	6.96667	2.35939	2.07031	1.00157	8.76506	0.726183	1.03319	18.3456	0.526373	0.302257	0.601041	7.70516	0.444114	9.49235	4.1622	1.39013	1.68978	4.01966	3.37932	2.39445	3.06346	17.1785	1.38808	1.36784	0.272319	8.77525	0.478141	1.71493	8.59798	1.07404	2.118
TCGA-HT-7485	0.334247	0	4.69501	1.25944	3.6652	1.561	0.913524	0.606426	15.6524	2.79334	0.577094	5.30331	0.19234	0.176189	0.105931	6.53322	1.00631	12.5104	2.00011	1.39809	0.458676	1.71878	1.39792	1.89585	1.89251	7.07319	2.99939	2.38986	0.679045	9.55146	0.585299	1.98133	0.291917	0.254105	9.03936
TCGA-HT-A5R7	1.68493	0	4.95698	2.71006	5.08557	1.8194	1.91578	0.623601	17.9347	1.13059	2.25016	7.27426	0.449079	0.117534	0.523278	9.10936	0.618537	23.311	4.5454	1.58637	6.46054	3.38602	10.0098	1.57861	1.67815	9.19809	3.1099	1.05863	0.434265	5.64467	4.70903	1.74961	1.9216	0.590786	3.30977
TCGA-FG-6690	0.391781	0	3.85277	1.95496	2.97324	2.706	1.7143	0.65398	17.8494	3.51736	0.737031	4.67982	0.359242	0.429992	0.0460457	8.99078	0.61822	11.4752	1.84556	1.97135	2.05605	2.32629	0.431605	3.88945	1.66339	10.1653	2.76732	2.17064	2.36131	8.64641	0.505296	2.44277	0.269638	0.859953	7.58282
TCGA-DU-7292	0.663014	1	5.80217	0.8658	3.10321	2.08142	1.22348	0.507648	17.7101	3.63413	1.86269	5.72876	0.266695	2.35924	0.854587	4.49352	2.91612	20.2119	9.74201	1.47579	1.31184	3.57345	6.84982	0.243137	0.294857	5.99592	2.99371	0.860922	0.401075	6.35571	0.997063	1.01251	8.95108	0.191399	1.69781
TCGA-CS-6670	0.550685	0	2.4966	1.04287	7.5809	2.19153	1.4628	0.46024	14.0566	1.1449	1.5773	6.48249	0.349731	0.136154	0.661893	13.2269	0.231818	15.3686	0.995329	2.3813	2.61502	1.95859	3.50533	4.86778	2.18613	10.3394	1.93	0.761131	0.785718	8.3835	1.83582	1.85763	1.28837	0.788462	6.56012
TCGA-DU-7011	8.76712	1	5.99604	1.30572	4.12812	1.36175	1.25548	0.3088	17.2931	1.71841	0.794979	2.46015	0.236694	0.530829	0.183075	7.06828	0.396057	13.8819	1.2865	1.57786	0.934255	2.12694	2.12185	2.90066	1.39289	8.27239	2.33177	3.52739	1.47741	8.19777	0.769941	1.36827	0.59459	0.705781	5.77724
TCGA-26-5134	0.457534	0	11.354	4.73451	3.24521	5.47699	2.71054	3.3282	4.00784	1.05709	0.641972	19.2361	1.1763	1.20683	0.584243	6.17799	1.03569	9.68182	5.76843	4.20468	3.08385	6.37403	0.100265	9.52586	0.60691	7.37331	4.38107	2.905	1.20811	5.59685	0.0954545	2.60717	2.64872	1.60813	1.21636
TCGA-26-1442	2.61096	0	7.94175	4.04652	1.90979	3.94885	3.24652	0.601253	18.3455	0.968942	1.1226	8.28877	1.34336	0.434824	0.174922	6.68249	0.954617	11.1032	3.99049	2.26121	5.40724	4.43963	0.939265	2.91438	4.12582	53.6744	3.37632	2.26837	1.95007	10.2213	0.288897	2.65704	0.707334	1.91164	2.84576
TCGA-06-0156	0.487671	1	16.5277	7.33591	1.06813	5.08504	5.42878	4.49376	5.02007	3.85009	0.439896	8.88468	1.79679	1.47641	0.792609	5.88256	1.81771	10.0593	4.75917	4.66527	3.38742	7.25966	0.277208	3.33172	0.26078	12.5407	4.8118	5.77457	1.0421	7.95377	0.235191	1.15107	3.07334	0.794831	2.12998
TCGA-12-3652	2.90959	1	7.50519	4.67927	0.0830109	1.75544	0.650563	9.53153	0.818943	1.59806	0.546011	25.3948	0.265388	2.55837	0.161981	5.17275	4.52661	8.23332	20.7498	4.56675	0.0583294	8.29519	0.388555	2.2526	0.012539	9.16625	2.38782	1.11574	0.600287	6.80488	0.256377	1.8086	2.25976	0.0104077	3.82314
TCGA-19-5960	0.452055	0	10.971	2.74454	1.77082	8.98723	7.37508	0.583191	8.73049	3.14805	0.597175	14.3302	1.26547	0.685598	0.504905	6.29659	2.21696	8.86364	8.49442	3.88829	0.359088	5.85846	1.05826	0.617631	0.107483	9.63415	5.92666	1.13091	1.22635	6.80279	0.259721	1.5067	6.00844	0.0729933	3.51266
TCGA-06-2557	0.090411	1	10.6758	8.21268	3.72464	6.21082	3.64955	1.15877	3.905	4.32927	0.484719	13.8125	2.34309	1.58343	1.88103	2.82922	1.31961	10.9964	4.68111	2.9597	0.950032	5.3348	0.258544	2.07785	0.198279	8.92489	2.60044	5.71246	0.397651	7.03261	0.0405408	1.98361	1.44754	0.477272	1.44527
TCGA-06-0686	0.783562	0	7.85274	5.82996	1.80128	4.10688	4.962	5.9898	4.5328	1.14688	0.685725	16.7685	0.735037	1.22232	0.380476	5.4356	0.452567	4.30966	5.34735	3.88913	3.16296	6.91303	1.14289	4.75298	0.134641	11.126	3.56453	2.05262	0.638768	3.4973	0.298233	1.46471	1.70378	0.409771	1.1763
TCGA-19-2625	0.339726	1	11.6189	10.1838	0.902515	6.46911	3.42775	11.2489	1.90081	1.51727	0.682022	13.1098	0.870595	3.51073	1.29355	6.11947	1.30414	7.02746	12.9475	1.93937	0.0718354	5.90271	0.0947572	0.599359	0.135121	12.8043	5.77009	2.61245	0.162342	5.07132	0	1.24277	6.40992	0.128176	1.52974
TCGA-28-2514	0.438356	0	4.49211	3.63106	1.68464	2.97635	4.12602	3.60405	5.748	1.62806	1.20743	9.18033	0.659858	1.06723	1.19349	5.12659	1.04704	6.83516	7.22288	2.38596	1.21825	6.01595	1.28056	2.33692	0.112529	3.15056	2.55688	1.39406	0.833885	6.25767	0.449703	2.96199	3.39704	0.0721742	1.65315
TCGA-06-2558	1.0411	1	11.4415	3.63868	1.67361	4.64355	3.80593	1.84316	6.23928	3.24419	1.03905	24.2007	0.810559	0.66606	0.878507	4.21217	0.405492	7.97412	7.93302	4.82095	4.20884	6.4243	2.65254	5.79701	1.06443	8.83258	3.42168	4.45979	0.719231	7.00986	0.604549	0.93604	2.03277	0.245419	2.89439
TCGA-06-0882	0.452055	0	7.41479	3.00229	3.234	2.64194	3.07505	2.3866	3.48512	5.57428	0.833724	7.3312	0.665186	1.17068	2.50913	3.97677	0.780824	9.69025	2.84368	3.18871	1.21842	4.21	1.49877	1.8672	1.30961	8.79396	2.02211	7.12071	1.04896	6.53109	0.56316	0.743112	3.07854	0.0517622	4.13941
TCGA-DB-A75K	1.00822	0	3.9211	3.0136	7.39567	3.95649	2.74083	1.35367	5.35716	0.912908	1.26108	7.03469	1.23884	0.614518	0.057324	12.6585	0.268481	7.2853	2.46732	1.63366	9.65239	1.95628	1.63919	4.42878	0.958494	19.5183	2.42541	2.01017	0.964582	5.59492	4.25524	4.49535	0.710858	2.12153	1.48374
TCGA-TQ-A7RM	3.05753	0	12.5356	7.47748	1.78511	4.14961	4.72155	1.74767	12.139	0.885205	0.495986	14.0898	1.29813	1.23746	0.0591826	6.18963	0.140793	11.668	4.31291	6.2073	0.185107	6.23551	0.0406954	5.43458	1.10999	11.6203	3.49932	0.443087	5.33833	13.1234	0.0428213	3.03323	0.302881	2.90014	2.76947
TCGA-DH-A66B	3.50411	0	9.43132	4.36425	0.377819	3.80097	2.52546	1.33726	7.50768	0.669504	0.949485	6.51869	0.327219	0.852389	0.323569	5.55147	0.572933	8.87848	1.74611	2.57751	0.646598	3.0795	0.227238	4.32042	2.87128	14.7421	2.93994	4.86122	2.79616	10.9351	0.259307	2.16896	0.0677212	0.926346	3.00535
TCGA-DB-A4XE	3.12055	0	5.82381	3.35533	2.90885	3.24498	3.55924	0.611435	17.4832	1.90873	1.39111	6.80112	1.17317	0.223443	0.297763	10.477	0.435811	9.78612	3.56006	2.05943	4.69108	4.03697	1.01836	6.72251	1.6135	15.2443	3.73524	1.83589	3.75781	8.74157	2.99267	2.14812	1.91355	1.60709	3.58188
TCGA-E1-A7YY	12.1781	1	5.47781	1.614	5.35538	1.40634	1.61355	0.583568	23.7144	0.768203	4.51303	6.04181	0.410321	0.117458	0.938178	7.56893	0.282244	31.4504	1.90885	0.91607	9.21682	2.53133	13.4797	0.667802	0.602202	7.69774	2.74116	1.08722	0.362153	3.8813	2.79206	1.28825	2.04516	0.133761	1.67582
TCGA-TQ-A7RH	1.33151	0	6.53069	8.18356	5.23002	2.86737	3.59381	0.733313	15.3636	1.1977	1.09035	10.5725	1.64068	0.968263	0.382889	10.337	0.271292	8.8806	5.11105	2.54265	14.8866	2.76321	1.37944	5.11734	1.83309	22.3769	2.63846	2.7977	3.6344	6.80264	0.913691	4.56588	0.388064	3.65239	3.14838
TCGA-DU-6406	1.40274	1	5.89226	2.43634	0.325179	4.16408	5.04456	0.683415	4.88438	4.80022	0.450293	7.72158	1.00563	1.20928	0.727843	4.52178	1.29752	11.0156	4.86212	1.84682	0.419354	6.42917	0.224576	2.52911	0.0154099	4.74153	4.48998	1.95612	1.37576	6.22262	0.0708922	2.00618	2.02501	0.0415696	1.30009
TCGA-DU-7014	9.78356	1	8.26095	2.81884	3.49512	2.63741	2.29402	0.650213	18.7081	0.57684	0.481427	7.3506	0.385136	0.649885	0.0324767	13.8668	0.22309	14.0966	1.15378	3.43756	3.40555	3.49649	0.320873	8.41573	2.99673	15.818	2.62699	1.74791	1.59607	8.31357	0.50032	2.56948	0.419514	1.49965	3.75752
TCGA-P5-A735	0.8	0	6.0268	4.33344	3.25369	3.32963	1.79208	0.820444	13.9443	0.798181	1.15487	6.62792	0.75155	0.450615	0.0328396	13.1832	0.143553	8.38165	3.94874	1.83893	2.96427	3.6225	0.906819	6.22446	2.41333	14.5914	3.68662	2.64906	1.50865	7.56007	1.42764	3.67967	0.305426	1.55298	3.67545
TCGA-FG-A6IZ	1.25205	0	5.19307	4.19172	3.9907	4.38419	0.757381	1.39232	3.9894	0.339981	3.1724	19.5377	0.685431	0.380529	0.698845	34.9319	0.171448	7.88455	12.9139	2.26282	3.13969	1.54177	1.42266	10.9012	4.42056	27.242	2.47643	1.4042	0.106661	10.1689	5.64639	3.51685	0.429869	3.19878	2.1478
TCGA-S9-A6U1	1.46849	0	6.07317	4.00383	4.75155	4.4908	3.71368	0.937525	12.184	0.700405	1.11139	5.02929	0.501734	0.713944	0.0858501	7.12451	0.27293	11.8622	3.02861	2.2372	1.87511	3.63907	0.320302	2.17605	2.23295	12.6115	4.36747	1.82855	3.90226	8.99387	0.247054	2.83323	0.395193	2.27062	4.93515
TCGA-E1-5302	4.17808	1	6.02347	1.078	4.66157	1.93258	1.13132	0.315126	11.1052	3.49338	0.900944	1.68944	0.152384	0.582281	0.920783	8.08279	0.614211	11.3067	2.36381	1.89728	0.727453	3.02864	0.646785	3.6695	1.08861	6.66671	1.82722	2.44075	2.19105	4.42099	0.750769	1.63033	2.88342	0.326291	5.0059
TCGA-TM-A84Q	2.11507	0	6.15144	4.48572	6.18962	2.96513	1.96635	1.26985	7.83373	0.514894	0.385732	11.2061	0.465761	0.466154	0.172739	9.31109	0.699008	10.4435	1.54836	2.54568	3.01762	4.24157	0.367593	6.3964	1.27514	16.1373	2.06064	4.66488	2.32533	7.8474	0.306213	2.36679	0.157086	1.88949	3.03668
TCGA-DU-6395	4.08493	1	3.90736	1.99239	3.18003	2.05285	2.95115	0.820806	15.3129	0.742262	1.17668	7.27176	0.471255	0.203145	0.0317242	12.3255	0.265468	9.07568	2.84363	1.76238	0.723819	3.06763	0.511145	4.45314	1.97249	14.9203	3.2844	1.90709	1.15915	7.24968	1.01227	2.23205	0.281938	1.08278	4.77505
TCGA-R8-A73M	4.94795	0	4.05008	2.81973	5.02447	4.03044	1.51269	1.54377	8.30942	0.42911	2.0756	7.57188	0.861341	0.200197	0.0669415	22.8611	0.173645	8.11411	2.75814	1.70264	9.17943	2.522	3.33433	10.043	4.42619	27.8299	2.00865	0.76197	0.495127	9.27217	4.8901	3.7432	0.276707	3.29271	2.93172
TCGA-DH-A66D	2.31781	0	5.98439	4.65872	1.4531	3.51879	3.91202	0.4852	10.9761	1.66161	0.824226	7.04664	0.70878	0.596837	0.366776	8.193	0.392016	9.68332	3.23828	2.38237	5.76258	2.89901	0.447611	5.25075	2.75187	15.8375	2.75938	2.7452	5.41435	6.34778	1.98269	3.29701	0.357156	1.8563	3.8586
TCGA-HT-8104	1.01918	0	6.86071	2.04767	3.87418	1.99415	2.43788	0.668702	7.89268	8.10305	0.960159	7.1929	0.533545	0.784646	0.849021	4.9314	1.94646	7.43893	4.4497	1.49638	0.415462	5.76937	1.06733	0.399356	0.165658	6.16302	3.72241	1.55518	0.615067	7.49114	0.309257	2.01755	2.92056	0.0388588	4.40103
TCGA-HT-8012	0.783562	0	5.0626	2.83194	8.25807	3.44176	3.30954	0.900943	14.8456	0.634286	1.1177	9.04981	1.10305	0.519243	0.150341	24.5058	0.195433	9.06481	7.61335	1.9881	10.7693	2.41855	1.74888	9.97061	2.12049	15.862	2.40412	0.624268	0.649037	9.71608	2.91372	3.17927	0.6912	2.85142	5.42675
TCGA-TM-A84G	3.3863	0	3.18117	2.02918	2.80699	6.10177	3.74037	1.82769	15.02	0.929407	1.74533	6.1312	0.703844	0.128948	0.0684667	14.0862	0.0352107	13.8331	1.71697	2.42352	6.91497	1.86857	1.94673	7.99877	4.4196	19.4199	2.28347	0.260732	1.58774	13.8156	2.62119	2.76088	0.582671	3.34957	4.20535
TCGA-P5-A72X	1.10411	0	4.65955	3.03241	1.02277	2.80637	2.1547	0.504002	14.1704	1.53467	0.700525	6.05586	0.668026	0.644137	0.19716	5.79779	0.381929	10.6908	3.29877	1.32328	2.02155	2.23965	0.556561	2.33217	1.66452	11.1092	2.27221	1.20941	2.14079	6.4875	0.733653	2.36121	0.881504	0.649433	3.98191
TCGA-HW-7489	0.693151	0	5.39039	1.87325	4.62476	1.92067	1.44122	0.838626	18.9685	1.1348	1.85424	6.52387	0.345354	0.195838	0.688357	8.85313	0.341422	21.0828	2.44818	1.60719	4.07231	2.8905	9.19152	3.30229	1.52566	9.90795	3.23803	1.20318	0.928952	6.34567	3.56982	1.49746	2.45736	0.650099	4.12484
TCGA-KT-A7W1	1.2	0	5.12172	3.8336	0.342336	4.85324	4.1039	0.860815	4.34581	3.82875	0.486951	18.6314	1.58691	1.9486	1.22014	2.57934	6.0147	11.4178	6.74329	2.34777	0.38488	7.24315	0.0777078	0.561735	0.0168851	5.85262	4.32465	1.01916	1.431	6.36163	0.0345239	2.09763	2.00755	0.0560604	1.09722
TCGA-DU-7015	7.56438	0	5.17265	1.47085	3.37558	2.04033	1.88334	0.651564	23.0239	1.34577	0.582351	7.38206	0.153657	0.431644	0.153182	9.55936	0.12299	11.2346	1.97348	1.97669	0.617803	2.39701	1.17875	3.30619	1.86338	5.15208	2.43802	5.24512	1.72715	8.04603	0.65808	2.07279	0.231792	0.534299	6.7591
TCGA-HT-7686	3.56164	0	9.59123	1.40783	2.86854	2.2126	0.954572	0.275044	12.5577	1.21448	0.446916	5.45752	0.110001	0.419179	0.176242	5.29	0.145278	9.01146	4.77781	2.32472	0.23152	2.76685	1.36892	3.00162	2.10429	6.54541	3.8571	6.31335	1.47997	7.02868	0.544507	1.93648	0.662942	0.48195	3.82408
TCGA-VW-A8FI	0.671233	1	8.12562	6.71092	7.56809	3.86331	4.14348	0.912342	4.79035	2.26321	0.720683	25.8952	3.01741	1.80236	0.550089	6.98069	6.03137	8.20338	9.36661	1.08132	0.767969	5.78324	0.357772	0.973485	0.117921	10.3836	3.94058	2.33989	0.35601	5.59346	0.0401842	3.10858	4.60232	0.304508	2.00761
TCGA-S9-A6U6	1.33973	0	4.62826	4.29246	2.3582	3.56453	3.04406	1.73125	11.5749	0.6945	2.33731	12.5065	0.521303	0.279309	0.330937	9.32661	0.526497	14.1126	6.33069	1.62484	6.73711	3.74179	2.0181	4.11249	2.15679	15.2757	3.42208	1.32385	3.39674	7.53353	1.28703	2.68686	1.27838	1.67678	4.97949
TCGA-DB-5279	3.70959	0	2.01105	0.880945	13.7043	2.3791	0.98628	0.706762	19.3966	1.90248	1.11224	4.51614	0.247593	0.226802	0.475444	9.07099	0.0765028	15.1313	1.59423	1.42335	0.685671	1.75677	3.16783	2.21946	3.30923	5.66907	1.39579	0.548512	0.532881	12.1629	1.15231	2.79883	0.289366	0.374829	8.84569
TCGA-VM-A8CE	2.99452	0	3.8433	2.76587	10.5769	3.03306	3.33232	0.652373	7.65785	1.48446	1.06118	8.87311	0.721496	0.385166	0.520568	12.9075	0.15776	10.1197	4.68624	2.03454	4.83859	2.20404	0.648725	4.45819	4.00129	14.836	1.67541	1.121	1.5826	8.72496	1.46369	3.05903	2.31002	2.52236	5.22317
TCGA-DU-A5TU	2.18082	0	10.029	6.59942	3.0447	4.20767	2.42447	0.806817	8.72461	0.698858	1.25014	30.0644	0.921656	0.592464	0.207251	6.67686	0.296594	8.32191	15.9057	2.91672	3.32357	4.20653	0.413468	5.3373	3.63649	34.9909	5.83124	7.67359	0.844165	7.25868	0.404567	2.66882	1.01731	1.30057	2.59426
TCGA-HT-A618	1.40274	0	9.27333	3.21627	3.78944	3.93878	2.06251	0.441812	10.158	1.23848	1.25473	5.77309	0.515238	0.773231	0.377625	4.69991	0.340016	10.1145	5.66385	1.97878	2.47426	3.83035	1.59517	3.35322	2.76277	12.9516	4.67046	6.01698	2.32214	8.20242	0.378073	1.96545	0.589889	1.45355	6.10651
TCGA-P5-A5F2	0.663014	0	6.61728	3.31274	5.51491	3.40197	2.7626	2.29875	12.8555	1.00552	1.19165	5.50532	0.653638	0.258082	0.171532	8.16414	0.620154	17.4055	5.18105	1.19164	3.6307	3.79425	2.07212	1.42598	2.8849	9.20214	2.48767	0.918438	1.35998	7.10149	1.73756	2.55547	0.737027	0.422292	3.86366
TCGA-FG-A70Y	2.37808	0	5.93953	3.58485	8.21237	2.77414	1.69555	0.69597	13.2242	0.653008	1.21072	16.3712	0.294735	0.644481	0.110438	8.78732	0.442334	10.7528	4.24609	1.6383	1.07513	2.51796	0.619374	3.57769	3.57528	14.6753	2.92351	3.34002	1.74542	7.58823	0.212168	2.0368	0.755593	1.01007	5.40432
TCGA-QH-A6CY	1.11781	0	4.32406	2.04153	14.4265	2.51017	1.4755	0.581983	16.7261	1.52775	2.0792	7.38638	0.500825	0.277787	0.412248	11.4783	0.427533	17.4499	4.62707	2.30979	4.75467	1.74184	7.65375	2.27498	3.64712	12.8214	2.137	0.958831	0.448299	8.20878	3.40227	1.87297	1.16393	0.983841	5.93333
TCGA-WY-A85A	3.61644	0	4.84896	3.98326	3.74058	2.7486	2.70756	1.41028	16.1624	1.31754	1.86415	9.71309	0.882357	0.240759	0.365957	10.1386	0.269228	11.1629	4.16474	1.97841	5.00841	4.20383	0.773428	6.96806	2.13592	14.8566	3.59837	2.2177	2.84396	9.08495	0.888668	2.98601	0.756353	1.97901	7.19894
TCGA-VM-A8CD	0.657534	1	3.52843	4.8669	1.74448	0.965868	1.66158	0.534678	2.37801	3.78095	0.685041	12.5796	0.527192	0.355837	0.730344	3.22231	0.396593	7.4828	6.38682	2.33981	0.589113	3.38786	0.294426	0.549534	0.228111	5.8566	2.66456	1.90888	0.519054	5.5361	0.28145	0.87715	4.94184	0.130578	2.77404
TCGA-E1-5303	5.62192	1	4.5806	1.74478	7.68024	1.48691	0.838753	1.79333	13.3241	1.21175	0.547323	5.1669	0.16518	0.77816	0.173911	12.0161	0.179432	8.8878	3.51282	1.77768	1.15013	1.73156	0.293081	2.92869	2.35068	8.45734	2.44365	4.47554	0.739168	6.25726	0.421267	1.48074	0.476645	0.104941	5.61506
TCGA-HT-7482	5.00274	0	8.03249	1.98318	10.752	1.43534	0.995164	0.885641	17.9086	0.819384	0.612142	6.88962	0.23446	0.540906	0.0765208	8.44227	0.169421	10.22	2.24324	2.07138	0.977958	1.97517	0.626502	2.17844	2.75712	8.83534	3.47873	3.35082	1.4827	9.65659	0.704663	2.07483	0.316304	0.908242	7.73139
TCGA-QH-A6CV	1.21096	0	9.72443	8.06069	4.77292	4.46472	4.7682	1.19324	2.27366	2.7427	1.06954	12.3937	2.33514	1.44727	0.800006	10.3752	7.97844	9.95839	24.7993	2.35613	0.119246	7.7816	0.21477	4.64666	0.315498	11.9566	6.4269	4.07975	0.102054	9.43276	0.030238	3.2124	2.82154	0.0859265	1.33638
TCGA-TM-A7CA	2.89863	0	4.92109	4.74779	5.30318	2.82159	4.15045	1.06055	19.5064	1.30491	1.43966	13.4827	0.807353	0.361797	0.107018	11.5987	0.139472	13.7575	2.28881	2.21678	7.32411	3.11962	1.58779	9.7907	1.82111	17.4171	3.83055	1.34835	4.95121	8.14583	2.29773	2.83299	0.471217	2.96574	4.28649
TCGA-HT-7620	1.18904	0	3.78069	1.84456	26.7534	3.90673	2.27109	1.22687	14.0682	0.95749	1.20575	4.11826	0.611813	0.288225	0.0933558	8.70175	0.291492	12.2512	2.80635	1.58905	4.63652	2.07298	2.63938	3.41073	3.52663	21.8358	2.02194	1.51813	2.33388	9.0001	1.22936	2.33613	1.09979	1.04131	5.93197
TCGA-FG-5964	1.03562	0	3.9073	3.08583	4.82625	2.6854	1.95346	0.58528	10.6931	0.894769	2.05409	11.0099	0.545881	0.812567	0.480249	19.2542	0.551043	12.9378	5.50578	2.66185	4.4722	2.48598	2.78641	5.75958	2.17617	12.3949	2.00122	1.8055	0.713312	6.25569	1.72046	1.70124	2.9293	1.52129	1.47297
TCGA-DB-5270	10.2274	0	6.8069	1.1689	6.66544	1.52143	1.41271	0.548012	22.3405	1.30272	1.81697	5.6251	0.206778	0.252552	0.730078	8.66093	0.325654	23.1695	2.54843	1.30876	1.17356	2.90734	9.04101	2.52795	0.744676	8.76512	2.17751	2.36416	0.550583	5.42583	2.85874	1.09737	1.38845	0.296436	3.58723
TCGA-CS-4944	0.884932	0	5.36687	1.71596	3.23649	1.53627	0.501469	0.586178	8.78768	0.903646	0.586895	1.73757	0.0703888	0.6609	0.271366	7.93616	0.325719	6.77534	4.27618	1.43469	0.410167	2.58444	0.358912	2.82685	1.45791	7.30262	1.09899	1.32547	0.0112956	5.90686	0.803234	1.22504	0.597275	0.137676	9.90516
TCGA-R8-A6MO	2.72055	0	4.56869	3.2431	17.6995	4.51552	2.0247	3.28039	8.03326	0.726004	1.54824	14.2306	0.848272	0.783857	0.0804723	19.2343	0.271738	10.1204	1.33578	1.64778	9.32107	1.95487	1.34098	7.12289	3.36664	19.1189	2.1799	0.937189	0.592267	8.1775	1.90203	3.34834	1.17655	2.89857	2.31519
TCGA-VM-A8C8	3.5863	0	6.64979	8.09513	4.31841	3.31737	1.68799	2.59346	11.1821	1.52001	1.52569	16.063	0.803875	0.513747	0.0998414	9.20667	0.324212	9.27432	7.20315	1.91687	3.3767	2.93727	0.163142	2.87975	3.62324	18.9096	3.22664	2.90092	1.50401	8.01631	2.59161	3.62887	0.319843	1.09826	6.08326
TCGA-HT-A74L	0.920548	0	3.57402	3.10172	19.721	3.9669	3.73234	0.643746	13.5595	1.38683	1.04748	3.89804	1.53275	0.321136	0.444123	11.51	0.477195	12.1596	2.356	2.26986	27.9819	1.80905	4.00328	5.10424	2.46725	18.4796	1.9404	1.20806	7.01265	11.6327	1.11643	3.05437	0.114738	3.11547	8.58863
TCGA-FG-8187	1.67397	0	4.1845	2.15662	16.0316	3.14238	1.87845	1.195	12.5901	2.25632	1.24694	6.88484	0.843619	0.283352	0.131409	10.4775	0.173502	11.0361	3.61165	1.80877	2.09832	1.96311	1.43244	1.6708	4.48283	13.0101	1.9712	1.50468	1.01083	8.75941	2.23439	2.44807	0.76822	0.671608	6.10701
TCGA-E1-A7YE	2.4274	1	5.76356	5.71425	1.2267	3.13279	4.68512	0.836639	6.60712	2.04553	0.825243	9.11338	0.607937	0.276624	0.162338	4.42779	1.73333	8.58427	7.55051	2.81231	0.843627	4.33567	0.597535	2.48326	2.90166	14.8015	2.27397	5.97601	2.19347	9.59115	0.0967308	3.34881	0.138154	1.10606	2.97151
TCGA-DU-5855	0.567123	0	8.27448	3.00951	2.99839	4.03452	2.35522	1.10838	13.2152	0.961122	0.517034	8.09844	0.761135	0.601972	0.0966253	8.31508	0.387009	12.5568	4.04281	2.76017	3.59754	2.5294	0.817923	5.23532	1.93134	8.72904	2.65987	4.38597	2.13583	7.38245	1.53567	2.36334	0.592224	1.29478	3.50212
TCGA-E1-5319	7.96438	1	2.81346	0.903383	12.5839	2.31591	1.54575	0.387986	14.5383	1.59431	1.48497	2.66829	0.173285	0.740758	0.165809	10.0188	0.418992	13.5662	1.22238	1.66916	1.74181	1.82732	1.50047	4.20519	2.23515	7.62377	1.64845	0.558706	0.642669	9.67212	0.869091	1.41342	0.828837	0.499484	6.10028
TCGA-DU-A5TW	2.08219	0	11.9609	6.91454	4.62728	2.81977	10.2478	0.989869	17.2439	0.809664	0.846457	7.41719	2.1177	1.04944	0.0417165	13.3446	0.167884	8.2696	1.97605	2.89221	2.07239	5.9546	0.176138	5.30953	2.65232	16.6186	5.3822	1.07884	6.34361	8.20866	0.12912	3.14889	0.124538	3.7454	3.87121
TCGA-E1-A7YO	6.25205	1	4.08513	3.39454	6.23055	3.38481	2.7402	0.753542	13.4421	1.18896	1.30587	5.86532	0.990859	0.374008	0.390901	23.5074	0.189308	18.499	1.43887	1.58835	7.58399	1.88495	3.35284	4.52528	3.05315	20.1865	2.18918	0.516457	3.27283	13.16	1.5758	3.22114	0.865615	5.74089	5.51039
TCGA-FG-7638	1.87945	0	4.01712	0.838791	6.1549	2.3777	1.13963	0.404165	16.8937	1.36065	1.0955	4.60672	0.134892	0.300086	0.192966	9.69178	0.375968	16.5284	1.85622	1.78378	0.907222	1.91828	3.26454	1.32518	2.73417	8.47686	1.33914	0.838772	0.606107	9.5266	1.62238	1.34661	0.670014	0.785572	5.94534
TCGA-HT-A5RA	2.27945	0	7.34368	2.42247	0.0497912	4.14902	2.42183	3.9486	2.58943	5.21602	0.739282	12.0457	0.894462	1.19431	1.19424	3.58879	9.58132	10.5796	6.41662	1.89631	0.0513141	8.18278	0.0492275	0.311375	0	6.61803	3.18584	1.72848	0.973139	6.25739	0.0102519	2.15806	2.10846	0.0998832	3.58946
TCGA-DB-A4XD	3.31507	0	5.64058	3.67706	4.33041	3.31059	2.91613	0.732618	14.2895	0.895251	0.621864	4.10118	0.78525	0.526062	0.0657223	9.50751	0.439736	12.4695	2.30922	2.39093	3.13752	2.50427	0.242611	3.64944	1.70943	9.62249	3.35367	1.07817	2.72337	9.17052	0.106995	2.75898	0.252263	1.26444	5.16151
TCGA-HT-8013	5.29589	1	7.87215	4.36685	4.36888	2.70324	3.61278	0.749342	13.6614	1.06642	0.792134	17.0291	1.06801	0.638193	0.104264	10.5944	0.14554	8.79479	4.55891	1.67904	2.19442	3.64114	0.60363	4.65837	1.97504	16.5563	3.48779	6.27248	5.71049	6.95005	0.264039	2.54667	0.158449	1.5889	3.08658
TCGA-DU-6401	7.28767	1	4.96787	1.75632	1.15437	2.08775	1.24986	0.613869	18.3154	0.378809	0.407851	4.23955	0.221303	0.620082	0.024333	7.37702	0.234443	14.911	1.32995	2.14739	0.276389	2.98861	0.0977501	2.88376	2.35938	9.13607	3.05883	0.825151	3.35357	8.41459	0.149652	1.81018	0.222718	0.553912	5.42985
TCGA-DH-5141	2.65205	0	4.86477	0.679288	7.2659	2.58754	0.863223	1.32216	9.50581	0.623199	0.941002	5.04554	0.135285	0.626915	0.127501	10.3262	0.195072	9.69908	1.0453	1.98892	0.293844	1.96621	1.26214	3.13467	3.40314	6.01257	1.47472	0.442192	0.837743	10.1678	1.46105	2.01658	1.00795	0.851996	6.27459
TCGA-HT-7477	2.02192	0	8.525	8.0626	1.26804	2.07575	4.33635	0.58945	7.06032	1.98264	0.78806	4.61622	1.27688	0.47156	0.109163	12.3141	0.151487	14.1391	6.62932	3.21992	0.54975	4.89959	0.626841	7.81875	1.28194	12.8235	7.19329	1.04697	1.23105	7.87461	0.317399	2.31737	0.467943	4.01927	2.76473
TCGA-HW-A5KJ	1.69589	0	6.06425	3.40187	3.86443	5.03284	1.46399	1.35446	9.45323	0.300154	1.63351	9.68519	1.18934	0.614573	0.187297	23.8972	0.361058	16.7872	3.16009	1.41507	10.172	2.73258	1.83813	7.73987	6.03147	17.7387	2.22082	0.200834	0.561157	10.3162	2.17565	2.54006	1.62415	2.52407	3.33177
TCGA-P5-A780	0.19726	0	6.98027	3.83432	13.3333	2.97303	3.4151	0.694669	10.8777	0.899842	0.696293	2.92618	0.753167	0.606174	0.0767273	10.7565	0.583684	12.994	2.02055	3.40374	0.856013	2.97999	0.577831	4.92431	2.79048	18.4834	3.37343	2.18257	6.20388	6.36837	0.264962	3.32654	1.26863	1.1043	2.22948
TCGA-E1-A7YM	1.77534	1	7.443	4.88862	23.0183	4.77832	3.74557	2.84701	11.2686	2.77187	1.45475	20.8584	2.38189	0.355798	0.503339	8.82375	0.742945	12.7549	5.252	1.37471	1.33402	3.83107	1.11285	0.477646	0.88412	12.8254	4.77365	1.29778	0.469311	7.10261	0.973378	1.97964	5.79726	0.21639	5.77289
TCGA-FG-8188	1.24658	0	5.35119	3.63236	7.6141	3.06927	2.59542	0.240227	17.5774	1.03114	0.594983	11.3419	0.468534	0.769198	0.10724	7.76716	0.225258	11.8699	2.93064	2.16202	0.572936	2.51322	0.251918	2.42363	3.13946	12.2188	2.72505	2.17143	1.85919	9.06683	0.345641	2.66938	0.261939	1.04233	6.72653
TCGA-S9-A6TV	1.56438	0	8.32361	10.5422	0.638008	3.29638	1.61002	3.85291	3.74998	2.5129	1.23127	16.281	0.39592	0.582989	0.0889257	5.1879	0.370213	7.04415	6.02679	3.63327	0.601163	3.86682	0.148685	2.09264	0.866437	12.6902	3.03185	5.25891	0.845549	6.23277	0.127611	3.27653	0.165411	1.64859	2.22512
TCGA-HT-A617	1.34521	0	10.9812	4.25525	3.43676	1.65901	2.08247	0.934708	5.30699	3.7846	0.997869	22.0645	0.860766	1.36052	1.35657	4.42571	0.29833	17.0645	9.80384	2.0951	0.914033	3.96724	1.11321	0.519972	0.200954	7.93448	3.44453	2.61898	0.346681	7.94882	0.216852	0.851805	9.38925	0.0787654	2.87413
TCGA-CS-4938	0.391781	0	5.107	1.67824	1.44531	1.89607	1.03046	0.561831	24.4818	1.19736	0.70364	2.57902	0.232074	0.256708	0.080679	6.62924	0.170861	10.9585	2.18562	1.55271	0.254652	1.93624	1.13302	1.62845	1.60751	8.68988	3.8265	1.75724	0.494684	7.57395	0.399742	1.80657	0.311742	0.14064	6.80259
TCGA-E1-5311	11.189	1	3.27629	1.64212	7.86435	1.74889	1.71746	0.674045	14.6088	0.774978	1.10649	4.03081	0.442686	0.241297	0.269637	21.93	0.263555	13.684	1.95429	2.14658	1.65486	1.92815	2.96475	5.9416	2.35227	10.4056	2.02729	0.600839	1.07088	9.34269	0.875808	1.87097	0.751119	1.25342	4.52627
TCGA-DB-A4XH	2.63562	0	4.00443	1.80964	5.93253	2.6679	2.68718	1.36285	13.9915	1.57009	1.99503	5.42835	0.490329	0.351064	0.428918	10.0126	0.253752	14.9963	1.57931	1.42464	4.29738	2.01704	2.23725	3.36104	3.70192	9.82226	1.70486	0.480191	2.57581	8.85579	2.03519	1.81008	2.18354	1.17431	6.78881
TCGA-E1-A7YH	7.76712	1	6.76451	6.38328	13.1384	3.68995	2.41816	2.37797	16.4754	0.659464	1.07851	19.3721	1.91381	0.499697	0.101967	9.72132	0.231961	10.1332	7.28481	1.89358	1.9597	3.39362	0.254627	2.2608	2.75137	16.4454	5.55826	2.86275	1.80915	6.45976	0.50722	4.65109	0.948342	1.24668	3.76055
TCGA-DH-A7UU	0.287671	0	7.7859	4.60352	3.91341	5.23363	5.59682	0.761531	16.476	1.24943	0.893215	14.4352	0.789106	0.645739	0.0337144	5.11144	0.236856	13.7569	9.48988	2.64084	0.441917	4.75288	0.304275	3.72766	4.10268	15.6279	3.80872	1.98775	5.59203	10.1739	0.234792	2.86297	0.339692	2.33521	3.33515
TCGA-HW-7493	2.99178	0	3.54429	1.05559	1.90513	1.26973	0.71948	0.364955	24.5021	1.86914	0.714713	2.53016	0.0739532	0.237101	0.503568	4.88145	0.166482	20.2664	1.49758	1.56987	0.571739	2.98734	2.3385	1.92236	1.33912	5.75303	2.30928	2.11172	0.771393	8.65727	1.21898	1.34091	0.642826	0.178907	7.37975
TCGA-P5-A5EY	0.19726	0	2.96516	0.950959	1.2704	2.2402	0.852755	0.392881	14.0481	2.6329	1.63719	8.52657	0.207683	0.313902	1.61382	5.24632	0.25974	18.3108	4.72851	1.01298	1.60562	2.77214	4.30861	1.31394	0.710922	5.56752	2.34881	1.45534	0.0399934	6.93818	1.31664	0.941876	9.1724	0.0769674	6.48422
TCGA-FG-6692	1.13151	0	10.3338	4.16686	0.652694	3.09061	3.25268	3.01153	2.24495	2.51007	0.611676	15.7735	1.66613	5.08986	0.823348	3.2087	8.14624	4.63856	9.70332	2.9359	0.0889464	7.66102	0.0464424	1.36056	0.0398348	9.1674	4.9016	2.33992	0.42264	5.16927	0.0162895	2.16366	2.37305	0.23806	1.39866
TCGA-HW-7491	3.34795	0	2.69214	1.1311	10.6698	1.93103	2.05561	1.65171	13.3917	0.336272	1.22712	4.26024	0.196452	0.293261	0.0291437	13.9065	0.0327592	17.2404	1.0513	2.80285	3.14	1.79193	6.11766	8.97439	3.6313	8.45772	1.16658	0.242579	4.10065	17.0457	0.524007	2.31627	0.0963739	2.36691	2.95801
TCGA-HW-7486	1.66849	0	3.19222	1.05958	15.4761	2.37224	1.59241	0.377147	12.7614	1.20317	0.86283	5.6579	0.229271	0.552681	0.109556	9.81407	0.245489	11.1752	1.86681	1.80437	1.83053	1.89805	2.79666	3.43434	2.44246	10.8684	1.72097	1.90723	1.45619	8.64249	1.65648	1.97039	0.892393	0.718832	4.12215
TCGA-DB-A4XF	2.79726	0	5.07951	2.3038	1.7545	2.70955	1.6943	0.425791	13.3409	1.13123	0.75558	4.19773	0.655367	0.27242	0.43236	6.13701	0.562038	17.3285	2.12197	1.99602	2.53684	2.84407	2.42088	3.01768	2.87425	13.2165	3.36689	1.30568	2.85637	9.39177	1.22898	2.3713	0.765938	1.14749	6.46432
TCGA-32-1982	0.389041	1	13.4735	6.06665	1.17489	4.07151	3.71648	9.44332	3.232	2.4712	0.658518	23.8435	1.3287	1.8413	1.28275	5.77644	3.80072	9.76115	9.39775	3.08089	1.68257	5.31073	0.746733	4.46085	0.54086	11.0781	3.26507	8.16135	0.349904	4.47757	0.587488	1.89981	2.90501	0.0841739	1.73002
TCGA-28-2509	0.39726	0	14.5609	6.57264	0.0739329	3.57239	1.68997	13.0346	1.84978	4.34937	0.601476	20.4729	0.574031	1.75276	0.960277	5.40382	0.625008	9.79137	7.19511	2.60871	0.0571456	4.26393	0.0411164	0.222917	0.0335033	7.91186	3.84952	4.07915	0.216746	4.59451	0.022834	1.3387	2.65556	0.0231738	0.79324
TCGA-06-0125	3.96712	1	6.90594	3.95655	0.436806	2.84024	5.22952	5.2559	3.36617	3.32698	0.558083	4.93854	1.01107	0.439867	0.945566	3.25387	2.22539	10.4515	3.90611	2.83251	0.429376	6.70567	1.24653	0.813485	0.0417303	4.4476	3.88543	2.02205	0.931498	5.27596	0.18579	2.10273	2.71694	0.111723	1.23675
TCGA-06-0158	0.90137	1	7.04467	6.12035	1.759	4.02571	4.36258	3.38973	4.03048	4.12542	0.70998	10.3845	1.68599	1.27601	0.638759	3.66896	3.56117	9.29049	8.16016	2.65753	0.869078	7.0673	0.266126	0.317106	0.0667231	6.88195	4.69064	3.50535	1.03598	6.20415	0.0779567	2.9684	7.03829	0.0712053	2.00452
TCGA-14-0789	0.936986	1	8.626	5.87403	0.142198	2.09862	2.22883	5.1389	2.75898	4.24999	0.484699	8.21563	0.466267	2.09896	0.581627	6.30465	0.753082	10.0679	2.7998	3.55719	0.147572	4.33335	0.29199	0.234527	0.0528722	5.10718	3.83016	6.73623	0.0855129	5.36072	0.013513	1.34234	1.21313	0.00548566	1.23406
TCGA-06-0174	0.268493	1	7.44813	3.71743	0.564532	2.91732	3.21457	4.47843	6.7603	1.10334	0.56739	9.79734	0.637649	0.629816	0.45307	6.08382	1.50897	8.43757	5.68092	4.17319	2.74861	7.68185	2.09978	2.96501	0.0330092	5.5547	2.93145	1.54735	0.412864	5.32144	0.371205	1.87473	1.12919	0.273985	1.04433
TCGA-02-2486	1.35068	0	14.8832	6.8909	1.73581	3.20436	2.04567	6.77219	2.25892	2.83307	0.431068	8.4381	0.432705	1.52886	1.5252	10.1208	2.6347	6.69685	4.81763	5.00454	0.0171187	5.24393	0.20323	0.952201	0.1472	9.69363	3.36916	5.83155	0.174587	3.71949	0.112863	0.695943	5.21965	0.0203632	1.36211
TCGA-76-4931	0.764384	1	9.53276	5.164	1.68784	4.82635	5.60476	4.42528	5.21648	3.79024	0.814856	13.1176	2.10809	0.931908	1.05863	4.40068	1.08083	8.98626	3.53593	2.76315	3.20946	6.61455	0.389513	2.08871	0.041625	14.0697	3.22975	1.81308	3.79697	3.28318	0.244685	2.58552	1.92749	0.138199	1.54285
TCGA-06-2564	0.49589	0	7.53988	4.94878	1.34122	4.00779	5.33505	2.95255	4.13968	6.51095	0.567186	8.20106	1.69218	2.9568	1.24589	2.95948	7.88304	11.4264	2.05571	2.58395	1.05643	5.93553	0.36327	0.678028	0.213513	10.8062	3.59414	3.65361	1.83336	8.46797	0.0992172	1.68465	2.43733	0.0805551	2.42627
TCGA-TM-A84O	2.76986	1	3.95557	2.37931	2.4405	4.57946	2.95172	0.704859	11.0591	1.02359	1.6733	9.58383	1.04682	0.546532	0.599619	12.7199	0.265912	11.8029	4.4172	2.34043	3.75018	2.3524	0.911429	8.99958	4.05776	15.366	1.82303	1.75474	0.431719	8.2677	1.73855	2.36604	0.709444	2.02351	4.17644
TCGA-S9-A7R8	2.63288	1	5.81779	9.09013	4.00739	3.73977	3.77462	0.293235	14.1881	0.757572	0.94584	4.94083	0.95892	1.01353	0.0393939	17.3561	0.319807	13.7447	5.00599	2.63927	7.75111	8.04351	0.299397	6.64164	3.72039	20.5929	2.02135	1.80647	6.50249	8.44953	2.13241	3.49713	0.091596	2.15149	3.49972
TCGA-FG-A4MU	0.893151	0	8.73416	6.35157	0.0334863	3.36267	5.22995	4.24332	4.26061	4.03153	0.398012	5.33403	1.76898	1.27954	0.441062	5.63429	2.70842	9.2474	4.99991	2.07634	0.112943	5.77079	0.189332	1.48083	0.0101164	6.40238	3.95947	3.95322	0.405771	4.6323	0.0517107	3.17922	2.62501	0.0839686	2.08038
TCGA-CS-5393	3.34795	0	6.03516	1.84098	12.0722	2.72792	3.82142	0.646011	17.9333	1.12515	0.853094	6.40482	0.272986	0.368513	0.341458	13.4624	0.186878	16.6635	3.43897	3.00435	1.48988	2.6383	1.72618	9.07413	2.2714	9.70818	3.14108	3.1875	2.17652	7.24185	0.437214	1.90324	1.348	0.682345	6.35548
TCGA-VV-A829	3.08767	0	4.09947	2.3783	6.88422	3.35791	1.15137	0.484945	12.2141	0.352807	1.10593	10.3869	0.599599	0.2197	0.0840584	21.7072	0.509927	18.4977	0.262531	2.94591	9.41409	1.48093	0.593217	10.6437	1.58647	14.1947	2.06523	0.9625	1.80894	14.305	1.73337	6.68004	0.0744559	0.946456	4.63784
TCGA-FG-8182	1.13973	0	5.50395	4.55817	12.5485	3.10502	4.23257	0.729738	17.5698	1.81462	0.89998	5.15332	0.756755	0.53385	0.0174204	12.0764	0.278493	12.141	1.82809	2.66946	6.37547	3.1015	0.987675	5.54142	1.32047	12.2238	3.33446	2.93758	3.8079	8.3606	0.56468	2.75524	0.439251	1.6118	4.61506
TCGA-HT-7881	0.243836	0	6.02533	1.42048	14.091	2.04841	1.89945	1.06924	18.85	1.58244	2.26821	7.71725	0.602443	0.130702	0.812819	8.67941	0.420345	14.0458	2.846	1.36592	3.54163	2.38723	10.0698	1.27339	1.92694	12.8654	2.66788	0.626439	1.11941	6.19095	1.6242	2.20314	1.7521	0.806235	5.0913
TCGA-DB-5277	4.23836	1	10.0093	1.40346	6.27228	3.44393	1.66641	0.456272	13.0624	0.963191	0.944383	9.60987	0.222807	0.566475	0.309624	8.59214	0.177429	18.0416	8.56094	4.32886	0.797522	3.70794	1.27347	2.77172	2.72503	19.2847	3.11445	0.690613	0.572077	11.0814	1.33757	1.53901	0.737796	1.04479	2.13826
TCGA-27-1837	1.16986	1	6.00728	2.90522	0.789906	3.55597	2.59103	1.47842	3.41649	2.53512	0.748406	10.087	1.29116	0.742108	0.618572	3.84441	0.721907	7.88652	3.10375	2.44263	1.08672	4.95982	2.07315	3.92766	0.175836	8.43043	3.00121	4.57976	1.88509	4.82563	0.2568	1.70213	1.76049	0.0521244	1.11416
TCGA-26-5136	1.58082	1	14.9724	7.71088	2.2742	8.32026	3.10285	5.56058	1.86035	4.85582	1.43351	10.2153	2.66555	6.54761	1.15714	5.79773	0.372479	8.80664	5.34647	2.2161	0.838531	3.72665	0.335455	1.31078	0.118202	10.1342	5.22153	5.51634	0.649991	7.45683	0.18126	1.49259	3.18053	0.134902	1.45735
TCGA-S9-A7QZ	1.08493	0	4.06321	3.05842	6.64403	4.61615	3.51819	1.01735	14.1298	1.04246	2.32961	8.211	1.11417	0.674638	0.404673	19.3348	0.25507	12.9388	1.40562	2.32959	13.3531	1.93491	3.225	7.22037	2.92297	19.0607	2.38875	0.396409	1.8425	7.20998	2.6434	3.7956	1.62584	3.60032	3.76888
TCGA-DU-6542	0.2	0	6.60259	2.84204	7.33117	2.51091	2.61045	0.547416	8.74227	0.775569	1.12928	3.51207	0.440293	0.365802	0.324006	7.9205	0.276608	13.1197	1.34498	3.90429	1.17206	4.48432	1.25928	5.68947	0.416542	10.6245	1.47428	2.6678	2.81308	6.58002	1.26713	2.58928	0.381446	0.788457	2.30984
TCGA-VW-A7QS	1.93425	0	3.80924	4.26682	4.51378	2.43235	3.23739	9.66956	18.4447	0.589172	0.847459	7.20582	1.33285	0.366726	0.0156445	14.5545	0.625255	12.7304	2.26592	2.33961	17.6624	2.18477	2.38987	4.32973	3.31342	17.6841	1.89376	0.174829	4.6507	10.6828	1.18855	3.09984	0.0485006	2.51702	5.08757
TCGA-16-0846	0.326027	1	6.14689	5.91193	2.68773	5.73421	2.62562	0.663193	4.69936	2.68831	0.852923	15.469	0.818358	2.34813	1.01229	7.11073	0.7345	6.209	4.90046	3.53911	1.66085	5.6917	1.71821	2.48942	1.19409	8.11607	3.51473	3.21728	0.2163	4.24569	0.500501	1.22962	5.32013	0.153624	2.47779
TCGA-06-0238	1.10959	1	13.109	3.72211	5.50094	4.07155	2.44513	1.28039	6.46338	1.37675	0.511326	19.696	0.882144	0.67603	0.946855	6.68823	0.646091	5.94408	4.89744	4.91007	3.3584	5.15405	4.11059	10.848	0.183062	12.8556	2.99062	6.22949	0.310879	5.37283	0.479566	1.39185	1.5751	0.375118	1.47985
TCGA-27-2526	0.238356	1	8.503	0.83189	1.16146	2.16004	0.510355	3.44349	0.403922	4.26909	1.2884	10.8294	0.10267	0.783738	1.51702	4.87779	1.99741	4.92498	4.99483	3.39131	0	4.95671	0.0764	3.17562	0	6.77394	1.91712	2.06365	0.161098	9.10815	0.0578572	0.676394	3.97585	0	3.93209
TCGA-32-4213	0.978082	0	12.3464	1.89872	0.289129	1.78671	0.332004	2.58436	1.66484	1.54746	0.687818	5.53696	0.108349	1.46395	1.36706	3.68029	2.05971	6.18981	11.1484	2.6038	0.250046	3.71252	0.181408	0.566272	0	6.33673	2.17763	5.87	0.31297	6.43619	0.0549517	0.898632	1.07635	0.0669235	2.35081
TCGA-DU-7018	2.55616	1	2.91683	1.69033	2.67972	2.02802	1.73939	0.644842	11.5473	0.511057	0.916748	2.5689	0.267415	0.28393	0.0998087	27.2567	0.130737	17.8065	0.372546	4.47685	2.01691	2.55695	2.51432	8.82031	2.65933	11.694	1.19527	0.183863	2.57479	12.78	0.696622	2.17286	0.493066	1.28885	1.91156
TCGA-QH-A65V	1.05205	0	3.41948	2.44016	12.5481	2.51232	0.835038	0.995181	9.08101	1.28745	1.29721	10.1968	0.39787	0.339496	0.152816	11.6678	0.392625	10.0359	6.77729	2.08014	1.31315	1.70207	1.58947	2.57865	4.7264	12.3232	1.93585	1.83729	0.209911	8.04852	1.45951	2.37945	1.70552	0.502723	6.25985
TCGA-DU-A6S3	1.79726	0	4.00195	2.2603	4.82166	3.65241	2.3102	0.878177	9.8406	0.853198	2.88626	5.13356	0.975098	0.339322	0.192013	17.7384	0.272516	15.0445	1.28798	2.90139	6.47186	2.26441	4.62003	8.12758	2.57278	18.896	1.87052	0.356506	1.03503	7.20676	2.57494	1.92258	1.36191	2.2252	2.2029
TCGA-DU-5872	1.45753	0	8.41663	2.73535	8.77809	2.55703	1.71306	1.18045	8.1133	1.12264	0.612787	6.45047	0.447985	1.48148	0.828398	5.76765	0.223187	10.0505	3.63826	2.08389	1.21607	2.50278	0.395427	2.15279	2.03878	11.1398	1.7093	4.18666	1.1991	6.74436	0.3374	1.72138	0.43862	0.494389	3.95606
TCGA-S9-A7R3	8.25479	0	6.97596	5.87678	2.86701	3.76539	2.65404	1.10029	11.7924	0.953305	0.966745	16.3789	0.770911	1.04888	0.0726553	7.99286	0.249543	12.3948	4.91417	1.46515	1.08839	2.80408	0.300251	2.23283	3.80201	16.6361	4.6755	1.79885	1.16434	6.40386	3.18538	3.24893	0.27217	0.644224	4.69618
TCGA-S9-A6TW	3.15342	0	4.06985	2.87557	4.33509	2.43467	1.60538	1.28607	6.49486	0.606121	1.31605	3.93989	0.497516	1.25561	0.0610035	17.4527	0.23873	10.5319	0.889121	2.95333	3.86626	2.05645	3.42468	4.62507	3.81814	17.4906	1.40656	0.476421	0.795126	13.6063	1.32858	1.9046	0.353026	1.76018	2.91539
TCGA-S9-A7QY	2.36438	0	3.94408	2.98368	11.5726	3.45875	3.38438	2.18667	12.4034	1.00385	2.12262	11.1412	1.50523	0.761045	0.129196	11.1932	0.322719	10.7952	1.75463	1.40238	11.3461	2.41756	1.63054	3.7103	3.51069	20.3275	2.1487	0.766396	2.59746	9.09699	3.75758	2.82524	2.03906	3.90809	3.27278
TCGA-DU-7008	13.0192	0	6.45375	2.71768	5.57591	3.40455	1.96015	1.01555	20.2797	0.62815	1.374	8.35088	0.489292	0.20455	0.210452	10.2281	0.223418	11.8917	5.75124	2.67964	4.44094	3.80258	1.89335	9.74834	1.09477	10.8028	3.68405	1.3665	2.04887	8.47724	3.38425	2.39674	0.549136	2.0175	3.60992
TCGA-DH-5140	1.66301	1	8.00221	2.96834	0.340721	5.15856	3.20822	0.334745	9.41506	1.506	0.580695	6.80146	0.514722	0.818727	0.466678	6.30505	0.0798436	13.3974	3.31937	2.98035	5.06086	5.50258	4.04722	11.2215	1.2352	11.9426	4.23352	0.985392	1.55722	7.17256	0.137609	2.96713	3.59383	0.23331	2.25209
TCGA-HT-7601	0.419178	0	5.92021	1.61105	8.10924	2.64329	1.37417	0.077431	12.4443	1.60413	1.08011	2.63898	0.235355	0.595817	0.137121	4.58772	0.71928	9.57354	3.29756	2.1207	0.474021	3.43956	1.14634	2.7685	1.52001	7.41937	1.53933	5.46359	1.41735	7.19316	0.390652	1.72018	0.488863	0.33127	3.02106
TCGA-DU-7298	1.57808	1	7.51974	2.00794	11.318	2.78633	2.2571	1.78079	11.8032	0.751768	0.794288	2.61611	0.369842	0.423482	0.231467	7.71516	0.258254	16.602	3.10372	3.06139	1.08468	2.02016	1.66065	6.20573	1.36081	7.97758	2.63522	1.87905	3.78852	7.17117	0.679956	1.36647	0.886619	0.831264	4.0928
TCGA-S9-A7QX	1.09315	0	4.7136	4.98093	3.39692	2.64683	3.02574	0.346339	15.8098	0.621675	1.24081	12.3277	0.831644	0.761808	0.084332	10.0662	0.168522	10.6896	8.29664	3.50805	0.728831	3.27078	0.323669	3.47486	3.04996	20.5028	3.31831	2.3593	5.23018	8.38669	0.160172	2.76236	0.122007	1.85098	3.46332
TCGA-HT-A4DV	2.16986	0	6.6755	2.24088	18.4226	3.04589	1.83099	2.24857	9.6212	0.802218	2.07224	6.49491	0.566299	0.286204	0.289402	8.82902	0.400524	11.0837	3.33451	1.39045	3.25372	2.05518	2.9782	2.68574	3.02255	14.8522	2.377	1.20563	0.200554	7.00805	2.45615	2.57411	1.81056	0.820182	4.14067
TCGA-FG-A60J	1.23014	0	6.098	4.26222	2.29898	2.66967	2.56511	0.958904	14.9996	0.809699	0.995981	8.67441	0.530368	0.332641	0.061243	12.5855	0.597575	10.1513	6.15065	2.89189	4.41955	4.23578	1.15199	2.30269	3.46081	13.0924	3.36382	1.711	1.14094	10.7987	1.26982	2.59021	0.545859	1.35365	5.49077
TCGA-HT-7693	1.46027	0	9.67934	7.7238	3.06109	3.18317	2.09788	6.14082	20.7105	1.43964	0.760532	14.791	2.36575	0.711851	0.141843	9.93393	0.644648	9.7204	6.97731	1.89816	3.84558	4.32105	0.167691	3.25782	4.63605	6.44116	5.3391	3.97797	2.90453	9.07815	1.58649	5.52174	0.187296	0.883024	10.5351
TCGA-S9-A7R2	0.865753	1	8.44994	4.13972	11.0471	3.18382	2.78826	0.810633	8.74341	2.23632	0.873022	12.8248	1.1403	0.923817	1.00988	6.66013	0.424252	9.03384	6.52316	1.64837	0.539536	2.64318	0.516328	0.491775	1.08024	8.73568	3.87791	4.36563	0.0735631	5.08706	0.441738	1.96976	11.1855	0.184044	2.58525
TCGA-DU-8162	1.21644	1	3.62837	0.910922	12.2097	1.19585	1.29914	0.431067	24.7758	1.86285	1.98038	3.79421	0.269872	0.193469	0.958765	5.80526	0.57916	22.1313	1.36999	1.23374	1.94605	2.46981	8.76068	0.41313	0.869276	6.44423	2.1353	1.21704	0.331396	7.21682	1.38856	1.2382	2.29887	0.122401	2.77088
TCGA-HT-A5RC	0.443836	1	8.84121	2.86588	2.17141	3.20184	4.1493	1.2726	7.10737	6.00835	0.469952	9.46662	1.42654	0.36187	0.602163	3.364	0.658749	11.632	3.9398	1.89089	0.0557134	3.2698	0.173706	0.458809	0.391963	8.19874	2.71136	2.01894	0.887517	8.513	0.0222617	2.01775	4.14241	0.0361488	3.94109
TCGA-FG-A710	3.05479	0	3.14995	2.95661	4.78028	3.14703	2.1333	0.651354	8.27893	1.13398	1.60953	12.7538	0.570014	0.669626	0.515891	15.4903	0.378758	12.7184	3.73414	1.98601	4.65938	2.33012	2.82669	6.53034	3.2639	15.0789	1.56131	2.82079	0.815572	7.57941	1.53596	2.70589	0.662795	1.867	4.58514
TCGA-HT-7605	0.380822	0	3.6621	1.21278	7.71352	2.05781	1.04121	0.843921	18.9039	1.81763	1.72972	6.14026	0.54301	0.292954	0.616473	6.60298	0.28998	19.8228	1.98371	1.54897	3.37659	1.76453	7.68298	2.16994	2.80296	8.01702	1.69164	0.843278	0.70139	8.96523	5.42691	1.82357	0.88802	0.482865	7.52935
TCGA-DB-A75P	1.34795	0	4.30289	1.78212	2.4399	2.72729	1.33665	0.336848	9.54751	2.15811	2.92023	3.99277	0.290492	0.38388	1.93035	4.49111	0.333526	9.93242	4.7957	1.0037	2.06173	2.62844	4.40994	0.796443	0.444154	7.16404	2.18028	1.67001	0.195636	5.10918	1.48779	1.66895	6.17366	0.08236	2.66149
TCGA-TQ-A8XE	2.6137	1	5.31947	5.5789	5.39833	3.24363	3.39585	1.18195	6.51053	0.555284	0.855016	9.96007	0.53705	0.438009	0.133627	8.91346	0.525037	9.4448	4.19499	3.04509	1.83214	2.62677	0.148646	6.4155	1.85186	13.6998	2.06194	1.58227	3.32913	7.29227	0.204595	2.90899	0.154194	1.78966	3.07024
TCGA-DU-7299	3.66849	1	4.51739	1.92392	8.411	2.24362	2.29225	0.593111	19.2364	0.644574	0.809682	4.80997	0.347079	0.333367	0.0782837	8.98355	0.151716	14.9142	4.78031	2.14025	3.81362	3.11588	0.430834	8.99474	2.67474	19.9527	3.10695	2.67546	0.60564	8.87486	0.724625	2.40827	0.245482	1.518	2.89334
TCGA-DU-7006	0.956164	1	8.89172	1.51322	0.580005	2.96015	3.16707	0.788943	3.8772	8.23817	0.710166	7.49674	0.732422	0.919533	1.99252	2.32619	0.591452	11.2412	2.73479	3.19265	0.137281	4.39782	0.199194	1.22722	0.0442667	9.06373	2.6951	5.0086	0.553666	7.61302	0.0226273	1.30166	0.670963	0.101042	1.76435
TCGA-DU-6405	1.65753	1	4.81379	1.94903	0.593577	3.17491	2.46349	0.463919	4.56957	7.03205	0.532918	5.09189	0.734843	0.378412	0.840057	3.51021	0.54844	12.0793	3.82618	1.63195	0.249337	5.17243	0.241837	0.673054	0.0472939	7.73618	3.55776	1.83929	1.6318	9.44045	0.0886404	1.73413	4.84693	0.0686965	2.77982
TCGA-S9-A7J0	1.66849	0	8.928	6.8645	1.6557	7.60456	6.93779	0.480107	8.35769	1.18652	0.834635	9.59096	1.17629	0.664332	0.138159	8.27527	0.194677	12.9243	8.59678	3.0921	9.67061	5.19104	0.150772	5.15758	1.86037	22.68	6.5398	1.27229	1.75991	8.53169	0.367818	2.28956	0.4393	3.0264	1.09419
TCGA-06-0745	0.654795	1	11.655	10.1401	1.36953	4.87379	3.29503	7.01274	1.68081	1.75852	1.05241	34.4795	0.875918	1.77544	0.813662	7.60697	6.51689	4.63208	10.0775	2.57772	0.245152	7.6258	0.107792	11.2781	0.0554738	14.7534	1.52788	6.53553	0.107665	5.21222	0.160683	2.4731	3.58703	0.272431	1.26467
TCGA-12-5295	1.24384	1	22.1511	2.70839	0.68652	1.88474	0.32534	0.58946	1.74669	2.46203	0.412456	40.7857	0.0530872	0.960428	0.574123	6.0309	9.9989	6.52139	11.9125	3.85094	0.0612569	6.509	0.0484819	3.70911	0.0526733	6.86319	2.00734	4.38379	0.0681529	4.38564	0.0134622	0.94383	1.94469	0.120231	0.931255
TCGA-27-1831	1.38356	1	20.3301	5.4515	0.938814	2.18321	0.39646	1.97986	0.899551	2.96474	0.496063	39.1972	0.932771	1.28167	1.93437	5.282	10.3562	7.50812	10.6713	3.44408	0.0555519	5.71136	0.247312	3.37691	0.104492	11.249	2.93148	8.27613	0.173828	11.1739	0.152605	0.955751	2.1671	0.0557556	2.58358
TCGA-27-1832	0.821918	1	15.855	5.23802	0.497575	5.40051	3.90553	5.41041	1.33209	3.75817	0.500094	11.0735	1.64696	2.76663	1.95752	3.9896	3.92642	8.22601	11.8973	3.05185	0.175944	4.13811	0.113067	0.0860361	0.339432	12.4339	4.82126	5.83549	0.125481	5.0958	0.0694014	1.27809	5.39705	0.201241	1.51607
TCGA-06-0132	2.11233	1	10.5614	1.96691	12.9754	1.51711	0.998422	0.928412	5.65576	3.16715	1.03643	10.7244	0.180372	1.11927	1.7619	6.33098	0.360934	11.9006	2.80234	2.15851	1.15479	3.31018	3.14926	0.768238	0.438756	4.56542	1.61736	11.1218	0.119515	4.41934	0.696428	0.624267	3.31393	0.0239591	2.65017
TCGA-27-1834	3.37808	1	10.3201	3.24065	1.40691	4.27265	4.3394	0.787571	3.82139	6.20306	1.21764	12.397	1.25993	1.17721	1.75116	3.46683	0.655505	4.98577	7.2818	3.4674	0.569898	5.65478	0.322176	1.48332	0.0500042	9.64619	3.9028	4.94731	0.226448	5.28925	0.11502	1.24729	7.82264	0.2179	2.26445
TCGA-CS-6669	0.616438	0	4.29313	0.836342	12.4321	1.40243	1.4002	0.531412	27.9596	0.871535	3.5098	2.91977	0.262186	0.10293	0.918903	6.50017	0.969661	23.7616	0.614982	0.976784	5.5191	2.32597	18.1463	0.401812	0.501703	7.25815	2.41997	0.526089	0.192339	3.38221	4.71107	1.09057	2.39528	0.0886834	2.48118
TCGA-TQ-A7RQ	2.17808	0	3.28118	2.75827	2.10688	2.75712	3.84186	0.675363	15.1883	0.56255	1.43631	7.46775	1.44091	0.282063	0.123336	22.5002	0.185639	17.5972	1.27907	2.6704	20.2798	1.85238	5.14106	8.27021	2.81234	18.8194	2.04406	0.268103	3.22326	8.75017	1.54567	4.27452	0.699364	3.4137	3.40906
TCGA-EZ-7264	1.19452	0	2.96866	2.08904	2.35025	3.7408	4.46404	0.544651	17.8265	1.2569	1.80266	4.07045	1.02178	0.143494	0.285205	16.5236	0.0997379	17.732	2.4941	2.20041	9.41245	2.52565	1.60834	10.8273	4.45088	19.8334	1.63968	0.334106	1.98362	14.5968	0.65003	3.89516	0.624823	3.58879	3.3133
TCGA-CS-5397	0.531507	1	7.85846	0.958242	3.24301	2.0088	2.16467	0.734884	11.1628	5.81566	1.38616	4.10816	0.413342	0.275369	1.12716	4.9958	0.208868	14.8163	2.74211	2.20888	0.450937	4.80593	3.06818	0.973905	0.256842	6.62681	2.88626	2.58806	0.589606	7.53676	0.897835	0.664569	4.29973	0.0343848	4.12462
TCGA-DU-8163	1.72329	0	5.15885	2.80255	6.63938	3.07934	3.56506	0.559031	15.8692	2.14293	0.818246	6.89134	0.679681	0.421175	0.0880787	8.43925	0.310017	11.3255	1.88185	1.94298	1.92379	2.71337	0.955422	2.79342	1.63637	9.90133	3.36404	4.25189	2.87435	7.13074	0.577906	2.1695	0.248236	1.35	4.95867
TCGA-DU-A76R	1.77534	1	5.30077	2.14303	4.98702	3.89087	2.02351	1.16508	15.5703	2.26335	1.10462	7.20271	1.25857	0.364069	0.17144	10.3671	0.474124	12.8887	4.95284	1.66171	8.3302	1.79117	3.87785	2.38835	3.45811	14.0019	2.49023	1.02557	1.59612	11.105	3.63865	3.20643	0.725532	1.52748	13.0971
TCGA-QH-A65Z	1.16986	0	4.51711	1.88034	7.04953	3.41933	2.27675	1.53669	10.9666	1.12996	2.33302	7.74523	0.777575	0.366033	0.108144	14.8582	0.194496	14.3598	1.89142	2.04935	6.30559	2.11577	2.5972	3.48164	5.43274	17.3588	1.92774	0.780121	0.873465	12.0347	4.09702	2.30597	0.581125	3.18854	6.75364
TCGA-DU-6396	6.26301	1	5.76507	3.16765	1.83786	1.70725	2.56969	0.182841	9.65076	0.806964	0.543277	1.83252	0.337286	0.940932	0.331605	10.6382	0.989379	11.1822	3.35633	3.85353	1.24188	2.50159	0.553048	5.33051	0.486773	12.8489	1.76871	4.1932	4.6056	6.35606	0.458758	3.33037	0.120572	0.779659	2.56436
TCGA-RY-A840	2.33973	0	4.03756	3.35132	11.627	3.46068	1.98174	0.695343	9.98621	0.576583	1.81831	10.7642	1.03035	0.242006	0.0338626	8.51829	0.322482	7.55815	7.91214	3.35976	14.3401	2.17117	3.8861	5.23235	2.0656	22.8173	1.98232	0.36537	2.4013	11.7792	6.12069	3.6047	0.253701	2.28019	8.25093
TCGA-P5-A5F4	0.632877	0	5.01446	3.72952	4.19231	3.33007	2.46108	2.42535	15.6487	0.905901	3.19184	8.30828	0.797435	0.304801	0.625031	10.4606	0.212378	22.5967	4.82282	1.67893	5.30645	3.44935	6.43732	3.48438	3.51779	9.88907	4.48704	1.16177	2.5925	7.31675	4.86489	2.86298	1.81422	2.05051	4.71407
TCGA-DB-5281	6.52329	0	4.60198	1.94435	2.95676	1.9901	1.57164	0.459503	20.4153	0.985097	1.04081	4.05772	0.228854	0.295957	0.277695	6.7744	0.461315	15.4624	1.56198	2.64802	0.44737	3.7972	2.5367	2.38474	1.36242	10.7964	3.16116	1.47112	0.967814	6.68641	1.09241	1.32676	0.752245	0.781611	4.27349
TCGA-DB-5275	3.99452	0	5.72325	4.60019	2.35377	2.48772	1.83239	0.247191	8.96562	0.944791	0.914146	9.58487	0.674288	0.564723	0.0709932	11.8515	0.185044	10.2535	8.334	2.32106	4.23618	3.38511	1.47791	7.84306	2.4238	26.1702	2.34509	1.87456	1.4345	9.53534	2.58733	3.17665	0.529495	0.939272	3.9582
TCGA-IK-8125	3.06849	0	3.812	1.78963	2.84639	2.83471	2.62931	0.394705	17.5252	1.93559	1.33557	3.72231	0.67686	0.229638	0.436076	14.3766	0.300984	17.4485	1.85028	2.69794	6.96888	1.92159	4.81214	4.46056	3.12695	12.4427	1.62986	0.897696	2.62983	10.5625	1.068	2.16765	0.919063	2.27986	6.02215
TCGA-HT-A615	1.41096	0	5.08275	3.713	9.54961	4.47548	2.19919	0.474351	14.5412	1.63847	1.20622	4.55129	0.907808	0.479379	0.731514	15.846	0.336599	16.7991	2.89925	2.00005	4.66328	1.79788	3.6576	5.18227	3.6877	14.6621	2.31873	1.89244	1.19286	11.4955	1.58166	2.65549	0.724996	1.64039	3.62539
TCGA-FG-8181	1.07945	0	3.1653	1.0863	2.65328	1.11006	1.04564	0.659147	26.2054	0.785457	3.13526	2.86612	0.607516	0.0947236	0.90432	6.85267	0.224166	31.8012	1.69786	1.23025	8.30472	2.99948	16.3926	0.208592	0.316353	6.54445	2.1331	0.595873	0.243381	3.63007	6.92278	1.13744	2.83922	0.0461291	2.21972
TCGA-HT-8114	0.323288	0	7.32057	2.10191	6.42955	3.41261	1.95453	0.912778	12.758	2.14374	0.605348	7.45629	0.710462	0.460787	0.137093	8.54095	0.549989	11.1302	2.47495	2.16016	1.54385	1.80646	0.598314	4.07974	3.30851	11.9546	3.81577	3.56995	4.46057	9.72227	0.173588	2.97781	0.274756	0.89047	6.57859
TCGA-DB-A64O	2.12329	1	7.19933	2.78837	4.56479	3.13015	2.84167	0.749138	6.94622	4.03181	1.1118	11.393	1.14739	0.498432	1.47825	4.51758	0.272205	12.6082	5.17916	1.33078	2.5988	3.49332	1.74283	1.30151	0.37557	8.77163	3.18059	2.87011	0.258157	8.08529	0.971877	1.06456	7.95139	0.0438374	4.48856
TCGA-DU-5849	1.2137	0	3.84857	1.59372	13.0912	2.94183	2.03904	0.702309	17.0348	1.03006	1.20519	4.51405	0.559439	0.445032	0.39509	11.4216	0.305643	18.594	1.57926	1.9367	3.23106	2.14267	5.15614	2.48647	2.29335	12.6762	2.03277	0.61808	1.19071	8.91184	1.91146	2.43946	1.48079	1.0912	3.97576
TCGA-DH-5144	0.668493	0	3.5463	1.72474	5.54995	3.53261	2.04386	0.787543	13.3438	0.994855	1.60841	3.65476	0.547728	0.297324	0.113758	18.5479	0.211087	16.1787	1.38562	3.82497	3.44942	2.32756	0.553323	8.87471	5.07228	16.2172	1.85017	0.561107	1.11465	12.8186	1.85196	1.88728	0.282135	1.73751	3.91322
TCGA-FG-8189	1.87671	0	6.88894	1.24496	6.81114	1.05797	1.95381	0.603795	28.9144	0.868391	3.5692	2.57972	0.456194	0.0576395	1.27279	7.86077	0.703012	36.4273	2.02038	0.944627	13.6743	2.99704	21.7377	0.530793	0.759599	7.66528	2.17682	0.291366	0.228878	4.51213	8.60588	1.14184	2.0923	0.211602	2.01072
TCGA-S9-A6WH	2.70411	0	4.59877	3.69475	7.9911	5.1426	2.89862	3.19554	15.5647	0.64224	1.13759	15.3965	1.39685	0.499918	0.119707	35.4427	0.130008	13.7954	4.38078	2.3871	14.5258	2.22529	1.99757	13.7109	5.42781	21.6857	2.69714	0.818292	0.683944	11.1474	5.56212	3.62979	0.548603	2.48804	3.93896
TCGA-WY-A85B	3.81644	0	7.35164	5.42957	1.83279	4.74693	3.13056	0.723789	10.4818	0.640642	1.01681	6.58105	0.504389	0.825762	0.107463	8.41771	0.204009	10.1876	2.3494	2.89994	2.53113	3.71556	0.307089	5.93939	2.23608	19.8922	4.98156	3.90918	4.32606	8.04526	0.402768	3.01109	0.0710729	3.36291	3.62308
TCGA-TM-A84R	1.55068	0	4.03029	1.48906	8.27516	1.67382	1.38035	0.800682	22.8739	0.955694	3.21562	4.72846	0.481971	0.183593	0.867775	10.1994	0.32944	34.5513	2.84157	1.27081	10.5326	2.57061	13.2716	1.63817	1.7424	9.99906	2.65294	0.524428	0.465595	6.41834	5.4213	1.3945	2.03053	0.444089	4.99618
TCGA-DU-A76L	2.23014	1	8.24255	4.00578	2.73848	3.27839	2.87934	4.15854	5.10217	3.25786	0.688811	10.9524	0.923234	1.12466	0.565344	5.56851	0.546493	8.12294	2.4127	2.80508	2.17301	3.19842	0.723957	6.02048	0.268576	12.2871	2.8497	3.28872	0.484025	5.76368	0.666812	1.19758	0.536204	0.338368	0.984783
TCGA-CS-4942	3.65753	1	4.8888	1.18186	7.18098	1.59145	1.53556	0.544752	15.0894	1.48543	0.831681	4.09172	0.099747	0.402032	0.434691	10.6688	0.139719	11.5395	3.38907	1.94323	0.316748	2.85163	1.3822	6.18993	0.863013	8.46298	1.3664	3.36986	1.8235	7.39675	0.906555	1.37576	0.40957	0.417307	6.20828
TCGA-S9-A6TY	2.61096	0	4.26725	2.65998	6.72711	3.13601	5.43946	1.74538	16.7534	0.983118	1.60152	5.08258	1.83605	0.219743	0.225431	15.4484	0.272322	14.7321	1.25232	2.80852	17.6303	2.51687	4.87305	6.10118	3.4787	22.7665	1.96541	0.33039	6.50279	12.8271	2.452	2.45524	0.855455	4.29692	8.38779
TCGA-QH-A86X	0.923288	0	3.00794	2.60371	4.84613	3.96745	4.07679	0.492483	10.8708	1.22063	1.24438	8.18405	1.45087	0.271232	0.355799	13.0756	0.421334	12.4223	3.65883	2.27935	7.59857	1.93971	3.33305	4.99545	3.767	18.2726	1.57499	0.41843	1.70634	9.7033	3.78433	3.35448	0.996821	2.78261	5.39053
TCGA-DU-7290	0.863014	1	8.52781	2.20307	2.69755	2.80966	1.77715	0.820309	5.48993	3.69591	0.889389	8.1304	0.490293	1.48939	1.08767	3.86112	1.13204	15.0463	5.83467	2.59596	0.0851036	3.30388	0.663349	0.497966	0.149683	6.84821	5.21896	5.73849	0.129115	6.88366	0.0850131	0.622645	7.25735	0.0517671	2.09956
TCGA-QH-A6XC	1.39178	0	7.28188	3.4723	3.58075	2.22847	2.42207	0.992809	7.44952	1.97454	1.79301	6.10445	1.52832	1.28406	0.729133	5.68498	2.40568	14.9041	4.39006	1.17834	2.17013	4.64772	4.15757	0.449851	0.357368	8.65143	2.98445	2.10353	0.112474	5.49304	2.60677	2.13007	4.51282	0.0801689	1.32116
TCGA-TM-A84T	1.98356	0	4.48582	5.51184	4.93085	3.29313	3.13711	0.856639	13.4682	0.433844	1.01202	7.37046	0.537379	0.598824	0.0887608	15.7752	0.199544	12.1356	2.32863	2.3629	3.28322	3.54829	0.519432	4.98619	2.15475	15.2731	3.50767	2.76368	6.04537	7.03342	0.393363	3.01301	0.229312	2.17174	4.05439
TCGA-HT-8010	0.136986	0	4.06357	1.15219	3.66887	2.44012	1.58005	2.03461	22.3481	3.5168	1.40959	4.8888	0.653272	0.231387	0.86175	7.00621	0.405241	18.9962	2.05942	1.13809	5.46358	1.52171	6.93383	0.987134	1.94454	10.2712	1.69721	1.04866	0.514382	8.04358	5.30999	1.63082	2.17043	0.383777	6.94819
TCGA-DU-A5TS	2.6411	0	9.90622	5.34714	9.18264	3.85034	1.79679	0.927484	10.2588	0.536491	2.01118	14.7082	1.67158	0.571167	0.0903353	11.3072	0.34511	9.68427	3.13668	1.82315	0.906242	3.39389	0.638092	2.18955	2.4615	26.536	3.13333	1.56443	0.476881	6.20828	0.578644	3.54907	0.538145	1.69348	4.9688
TCGA-DU-7010	1.24932	1	12.8104	2.53932	4.99292	2.23558	2.05671	0.244275	9.60809	0.772089	0.830125	18.0327	0.412079	0.217644	0.240893	4.59469	0.174575	12.332	3.64104	3.77481	0.366688	5.57041	0.761705	2.11589	1.7828	5.91728	5.60824	1.59068	1.60137	10.3462	0.33138	2.64142	0.5409	1.34831	2.09309
TCGA-DU-A6S7	1.74795	0	5.41224	7.06042	3.03792	4.6082	3.43252	0.807024	8.82882	0.944739	1.09624	7.75502	0.567254	0.851989	0.0695961	7.33431	0.235201	7.32085	4.83312	2.30703	1.98134	3.27585	0.283136	4.12721	3.19445	14.4491	3.59312	2.33481	4.14635	7.93506	0.269553	2.81003	0.194607	2.02017	4.89753
TCGA-HT-8109	0.463014	0	4.56292	1.1954	7.49856	2.81128	1.62122	0.748377	23.6815	1.909	1.75615	3.85296	0.349634	0.270111	0.506184	8.45521	0.3161	20.9806	1.06975	1.87167	3.13808	2.16646	9.35599	2.19695	3.12635	10.2789	1.85207	1.3368	2.49846	9.9261	1.18786	1.9684	1.0113	0.849952	7.28059
TCGA-FG-A4MY	1.97534	0	6.95769	5.89438	12.6683	3.8937	3.4305	1.07041	13.0259	0.624019	0.986469	7.00786	0.90943	0.77561	0.13189	7.72488	0.258853	9.96736	7.68916	2.16597	0.998725	3.63716	0.224341	2.79488	3.20486	15.5061	3.54664	0.706693	3.07984	6.77355	0.811144	1.71274	1.53169	2.02737	2.31143
TCGA-HT-A61B	1.46027	0	15.5427	5.59052	0.846992	4.61164	1.80035	0.903786	8.1837	0.669355	1.21962	8.04143	0.784886	1.04765	0.332347	14.3831	0.499225	8.0009	5.84218	4.17561	1.10751	3.90289	0.361813	4.72513	3.83821	15.092	4.3034	4.63128	0.863684	8.14235	0.284338	3.41118	1.03034	1.62061	2.21883
TCGA-QH-A65X	1.32055	0	4.71462	3.92307	1.47266	2.79279	0.79026	2.57437	4.70286	0.278417	1.85268	11.6564	0.439603	0.869807	0.0751279	21.6694	0.404647	4.76429	3.07964	1.95324	1.96409	1.74654	1.88422	6.66847	2.97763	16.3231	1.7198	0.412544	0.210694	7.44484	0.998838	2.94784	0.504637	1.19714	2.3342
TCGA-HT-8019	2.75068	0	4.02111	1.41701	4.01865	1.41111	1.406	0.894573	21.6792	1.1345	4.06736	3.03226	0.548068	0.108971	0.929158	7.92623	0.386824	31.4963	1.48818	0.83798	12.0286	3.20998	13.337	0.299179	0.767215	8.00832	2.56265	0.503631	0.087269	4.00844	7.73994	1.01813	3.92515	0.0874737	2.46076
TCGA-DU-5854	0.70411	0	6.22739	2.89256	9.75448	2.92113	2.94497	1.04666	7.58595	4.37556	0.634062	4.34724	0.662973	0.790715	0.573875	5.04462	0.409567	12.6369	2.96123	1.43522	0.143758	3.32166	0.365715	0.881229	0.662219	9.8064	1.96033	2.98886	0.742588	7.67822	0.0541598	1.95981	4.54539	0.102603	2.53329
TCGA-DU-6408	9.50685	1	5.80469	2.67118	0.819246	2.49817	1.99018	0.309682	13.6334	1.05133	0.91327	6.1637	0.296508	0.319033	0.165894	7.75948	0.188358	11.264	2.76134	2.8653	1.19042	2.15352	1.32098	4.59849	3.3996	14.6821	1.38949	2.85347	2.7673	7.91141	1.13621	2.2906	0.631186	0.844976	6.3036
TCGA-S9-A7IZ	0.594521	0	6.91269	3.96721	1.52843	3.27535	3.84335	0.736876	15.6781	0.830672	1.577	6.93221	0.9855	0.519762	0.354865	7.38762	0.453169	13.9949	5.18666	1.14473	1.88378	3.19843	2.93033	1.20481	2.03465	20.279	3.07904	2.51983	1.77636	8.87491	0.908762	2.57522	1.17019	1.61503	5.44393
TCGA-P5-A5EX	0.665753	0	5.96462	1.85008	3.1614	2.74721	0.648898	2.65663	16.6054	0.878756	0.984994	6.5958	0.267383	1.0581	1.07527	7.04594	0.187266	8.40828	1.68584	1.5155	0.937934	1.3156	0.289769	1.35331	2.71665	7.135	1.85082	4.11385	0.370725	6.11279	1.01978	1.357	0.770299	0.0616572	4.64105
TCGA-E1-A7YL	1.34795	1	16.0648	7.76497	1.41714	5.03133	9.57446	11.467	2.566	4.55784	0.684635	29.806	2.72308	2.16265	1.19639	5.08479	7.37721	6.92949	17.6591	2.12045	1.74598	4.99518	0.185119	2.69607	0.0532385	14.5043	3.81405	4.84217	1.15955	5.34208	0.0634977	4.48968	4.76027	0.46767	2.16872
TCGA-DU-8164	1.78356	0	2.78062	1.24431	7.72747	3.04947	3.24271	0.377175	13.8734	0.937419	1.39573	2.98204	0.659645	0.264966	0.285412	8.08727	0.229408	22.2377	0.98848	2.07973	6.34326	2.0405	5.32407	8.48448	3.33901	16.1806	1.50606	0.457356	1.79332	12.3341	1.30959	2.35797	0.449713	2.78018	5.93393
TCGA-FG-A711	3.6411	0	4.43395	3.96397	4.37118	3.32199	2.23999	2.29556	13.7453	1.16672	1.54713	21.232	0.849214	0.118278	0.171069	12.7804	0.934128	10.0332	4.82718	1.9272	3.70873	3.28608	1.9109	3.66102	2.37503	13.063	2.64359	1.77834	1.35161	6.50661	2.18623	2.587	0.674235	0.535778	4.86629
TCGA-HW-7495	0.358904	0	4.03302	1.41002	11.436	2.29762	1.61029	0.493309	16.7367	1.43609	1.45768	3.92508	0.81398	0.200578	0.392769	10.7175	0.290519	19.8549	1.45893	2.05738	3.8932	2.08973	5.63975	2.96442	3.26832	12.4251	1.87233	0.576023	1.96774	8.78876	3.24469	2.28815	0.937867	1.22311	6.22309
TCGA-TM-A84C	1.34795	1	3.42394	3.62052	0.102609	1.44255	1.62267	0.173451	9.69501	2.61709	0.790365	5.6286	0.62094	0.171713	0.0500558	4.32954	0.441528	8.28524	2.77005	2.78909	0.580409	2.96924	0.570641	1.43518	1.59643	8.47588	2.33074	1.93854	0.14038	5.47243	0.0237679	2.18184	4.47441	0.0353784	1.21629
TCGA-DU-A76K	0.950685	1	3.25456	1.37653	3.20745	2.83162	3.42193	1.21621	10.6576	2.94195	2.84949	15.8281	1.04097	0.276296	0.742565	6.81196	0.563081	14.6733	8.69691	1.38815	4.91672	4.68065	3.79595	0.234739	0.335769	9.79079	4.13331	0.513247	0.255	5.90356	1.49244	1.89277	4.95739	0.0181759	4.54168
TCGA-S9-A6U8	8.1863	1	4.969	3.78858	7.06229	3.59708	2.53305	0.715704	15.1202	1.16008	0.824473	12.8998	0.648442	0.567165	0.164217	10.0402	0.217656	11.3181	4.17632	1.43283	2.36345	2.13604	1.06212	4.05989	2.62336	13.6219	3.51526	2.38142	1.74012	7.17067	0.585605	2.64143	0.851963	1.50906	7.35928
TCGA-S9-A7IQ	3.01096	0	4.00202	1.29951	4.72531	1.49279	2.28932	0.52521	21.0021	1.04009	3.11892	6.52647	0.462956	0.0731173	0.786501	9.34126	0.539068	29.006	2.09692	1.23334	11.6088	2.48424	17.0042	2.14293	1.13253	8.51003	2.27677	0.443528	1.15794	5.58096	6.7444	1.49728	2.04843	0.614634	3.18608
TCGA-S9-A6TZ	2.39178	0	7.1074	3.44959	4.28979	3.77365	2.71848	1.26818	16.1821	1.63305	0.692248	4.37634	0.750184	0.516071	0.059384	8.24697	0.103835	15.6875	3.73903	2.13245	4.86122	3.2559	0.31412	6.34887	2.74198	12.6651	2.91441	1.84167	1.87287	9.50926	0.511308	3.54028	0.245468	1.39925	8.07232
TCGA-DU-7300	5.16712	1	5.69569	0.830847	9.35092	2.30604	1.14191	0.442589	19.8418	1.76829	1.25713	2.75476	0.116456	0.286925	0.74312	11.0314	0.245088	22.2523	0.703306	2.2532	1.27149	2.18665	7.68437	3.17246	1.72924	5.82538	1.7291	0.75867	0.463983	9.49517	2.93281	1.60152	1.82841	0.56222	4.47381
TCGA-E1-A7YJ	1.62192	1	8.69792	11.2066	2.82821	4.44442	6.68883	1.54103	3.34516	2.82024	0.632573	26.6458	1.80408	4.30946	0.586612	7.33774	5.61153	8.01346	14.2935	2.35071	0.109514	8.35282	0.127024	0.756192	0.227303	7.69272	4.94619	1.84377	1.37598	6.00547	0.0331965	3.30629	2.00486	0.0606431	1.66941
TCGA-DU-A6S2	2.12877	0	3.42555	1.4846	8.44217	1.89636	2.31787	1.17593	14.6524	1.31477	2.44797	3.93465	0.785842	0.0928841	0.430518	8.97811	0.304356	20.8448	1.06553	1.61008	10.4929	1.8978	5.21971	3.32473	1.63992	8.87553	1.65799	0.463267	1.23666	6.30134	2.65362	2.03805	2.14052	1.02297	2.89279
TCGA-HT-A619	1.60822	0	5.51372	2.79656	15.3059	4.15369	3.75599	1.00056	10.0852	0.58007	1.1109	2.80979	1.15277	0.594315	0.0185623	21.7136	0.127509	7.9599	0.0507271	3.96803	6.36346	3.02838	1.35785	10.8864	2.62094	13.8175	1.73126	0.0429179	0.877542	11.6972	4.50097	3.27728	0.105502	3.80703	2.27481
TCGA-RY-A847	2.55616	0	3.0126	1.89241	6.6577	2.49896	1.49077	0.666918	13.7322	1.46479	2.42335	9.23051	0.544429	0.371381	0.287665	14.9052	0.220204	17.1087	2.33303	2.0249	5.16471	2.10966	6.49182	4.97067	3.37903	7.89614	1.83092	2.44589	1.01122	9.43671	4.91141	2.43452	0.75756	1.12569	6.94799
TCGA-S9-A6U5	2.71781	0	3.07225	2.36981	4.42116	3.60742	2.1809	0.651291	7.82624	1.66838	1.30635	15.5248	0.759247	0.443749	0.186572	9.95568	0.274963	9.35162	5.22101	1.57543	3.94294	1.81521	1.5002	2.46005	3.06877	13.0761	1.45133	1.19059	0.81326	8.05689	1.37964	2.24233	0.439589	1.42702	5.87451
TCGA-HT-8011	1.35342	0	8.97362	2.65632	0.376915	4.9095	5.06896	1.74366	8.45311	4.87533	1.16723	8.50157	1.26865	0.665158	0.367741	4.55031	0.630481	6.60186	3.32551	1.91959	0.874478	7.07823	2.61954	0.43162	1.47407	8.37066	5.34898	0.94816	1.78941	7.94724	0.321712	1.74826	1.78955	0.518964	2.89485
TCGA-DB-A75O	2.56164	0	3.2361	2.80312	2.83147	2.68531	1.39191	1.18344	9.21924	0.580108	0.608413	5.60304	0.523219	0.620888	0.0285781	7.16181	0.124924	6.06339	2.96773	1.48176	1.55325	2.24767	0.604527	1.96258	1.38044	8.23902	2.56009	2.7458	0.366384	5.88213	0.578973	2.15716	2.52994	0.411313	2.12989
TCGA-DB-A64U	2.31781	0	4.59557	2.73482	14.9058	3.46201	3.20155	0.857768	9.36057	1.1777	1.17477	5.82129	1.00427	0.309593	0.197259	15.7384	0.159414	13.8899	2.87504	2.58875	7.3763	2.07355	1.45509	6.1199	4.82888	16.6074	2.23244	1.26391	1.14051	9.24785	2.22345	2.95306	1.62277	2.49711	5.91983
TCGA-WY-A858	3.66301	0	6.75418	5.61899	3.51522	3.2549	2.50204	0.551157	10.9266	0.73283	0.997058	13.1131	0.676312	1.55733	0.114322	8.35935	0.521468	8.16881	3.80337	1.86	1.75839	1.91464	0.566645	2.19828	1.98234	13.2581	2.64908	4.22152	1.30635	6.50562	0.0629371	2.57305	0.195187	1.5994	4.13221
TCGA-P5-A5EZ	0.191781	0	7.05629	3.57398	8.99131	3.36472	2.86114	0.754714	9.91603	1.13917	0.615276	9.88669	0.680635	0.979094	0.201945	6.28022	0.176553	10.7798	1.5011	2.31193	0.763272	3.86805	0.22101	2.3188	1.74085	11.7607	2.2121	2.96958	1.3204	7.33114	0.16365	2.27583	0.868141	2.21309	2.65637
TCGA-E1-A7YK	1.03562	1	7.36222	4.53731	20.6155	3.86262	2.58329	0.906408	10.4544	1.16719	0.856211	14.0315	0.679585	0.925364	0.378879	6.91507	0.51455	6.8048	4.1416	1.52035	1.01306	2.95315	0.522784	2.19269	1.79506	12.6847	3.25352	5.89107	0.63665	4.90241	0.363298	2.34822	2.16672	0.847076	2.13384
TCGA-HT-7475	1.45205	0	7.21979	3.59713	5.03698	2.28238	1.93293	0.648543	13.3644	0.966732	1.69742	8.79667	0.788511	0.166129	0.423218	10.4207	0.16173	22.3848	3.83222	2.89432	5.53921	3.64141	3.83098	3.86945	1.06401	11.3723	2.5428	0.564719	1.81199	4.11089	3.88714	1.61269	1.45566	0.899395	2.71545
TCGA-DU-7302	5.02466	0	3.80672	0.790177	2.95951	1.8761	1.96111	0.513383	29.2777	1.25277	1.51933	1.79704	0.400004	0.217433	0.521154	10.7952	0.316652	27.1569	0.615874	2.867	5.27904	2.38186	6.78421	5.77475	1.2648	6.61266	2.3399	0.591623	1.72679	11.0311	1.81023	2.37823	0.873334	0.926734	3.04104
TCGA-S9-A6TX	2.87397	0	3.9199	2.55786	7.90148	3.32464	2.01311	0.890449	6.72266	0.683054	1.04857	3.43029	0.943827	0.517047	0.0296507	13.0211	0.254597	9.83228	1.13441	1.65377	4.77912	2.08263	3.15204	4.47973	3.43372	23.1175	1.31548	0.725542	1.21168	8.21742	2.52482	2.98815	0.42131	1.77558	4.07223
TCGA-S9-A7J1	0.682192	0	3.21749	2.10056	7.79607	3.2185	3.06427	0.683981	12.4017	2.9663	1.08116	7.03878	0.878967	0.385704	0.446934	9.59689	0.421283	13.4718	1.33661	1.61151	7.82721	1.98691	4.96371	3.92638	3.04979	15.1288	1.63993	1.09835	1.22977	10.3805	1.84722	2.88666	0.557715	2.293	6.82906
TCGA-WH-A86K	1.10959	0	4.96174	5.67184	1.10601	2.87216	1.85161	0.579842	9.88208	1.49495	1.07828	15.7454	0.604271	0.611188	0.0958068	7.61792	0.377868	10.8907	5.51201	1.81968	1.77221	2.68992	0.0996399	3.40747	4.50919	17.4096	3.84244	1.59335	0.775759	9.46686	0.140466	2.50365	0.198012	1.3167	5.61388
TCGA-FG-A60K	1.48493	0	4.03821	2.6841	7.09291	3.8035	2.98495	0.655084	9.8198	1.93356	1.06811	4.31604	1.1028	0.271255	0.25767	14.0193	0.413765	14.4032	2.41426	1.97765	8.68133	2.15475	0.752239	4.61764	4.69087	13.9897	1.84587	0.914126	3.86713	11.3343	0.994326	2.94791	1.80897	3.59081	9.05355
TCGA-CS-6290	1.49589	0	5.61279	3.45325	6.75683	2.64684	1.06173	1.46947	12.1287	1.98087	0.509548	4.47049	0.270699	0.380217	0.249383	10.0602	0.279869	8.86351	2.60752	2.00782	0.591397	1.64815	0.953156	2.85933	1.78164	9.49901	2.65575	5.26458	1.06573	5.86137	0.210513	1.77223	0.351083	0.397568	4.76804
TCGA-HW-8319	0.717808	0	3.9227	3.17328	3.31299	2.64716	3.33636	0.278669	14.9467	2.77784	1.25198	5.0689	0.927882	0.204556	0.385538	9.2709	0.327433	19.4532	4.07953	1.71342	3.85976	3.99289	4.5616	4.82933	2.7734	10.024	3.49046	1.93018	7.9282	8.4334	1.56996	2.87528	0.650208	1.32222	5.02632
TCGA-HT-7688	2.6411	0	5.88798	2.17197	6.25232	1.41518	1.43327	0.463721	25.2895	0.915924	1.89145	2.70093	0.313223	0.140272	0.716516	10.0054	0.309905	36.0211	3.26095	1.7991	3.37973	2.73096	13.1329	4.39601	1.50556	9.88682	2.82318	0.74775	1.98376	7.24962	5.40118	1.4592	1.6307	0.664953	3.54307
TCGA-HT-7479	0.591781	0	4.72438	1.65781	12.0666	1.81043	1.13775	0.979694	22.5116	1.50807	0.725407	5.69215	0.275193	0.30852	0.164518	10.5187	0.180818	10.7569	2.40983	1.64657	1.60762	2.03836	0.362601	2.27771	2.01321	8.98339	3.11921	3.55023	1.07569	7.05207	0.39163	1.66415	0.74125	0.507394	7.11663
TCGA-DB-5278	4.18082	0	2.79826	1.22785	8.37955	2.91684	2.03917	0.570158	12.329	1.82932	1.91788	5.177	0.323498	0.211666	0.613941	11.3532	0.404584	14.8476	2.59676	2.11973	3.94968	1.98473	5.92745	7.10187	2.66716	11.0353	1.81217	0.874996	0.613068	8.80213	2.25791	2.14888	3.52609	1.11325	5.01108
TCGA-FG-7634	1.27945	0	4.31006	1.6742	9.05723	3.12173	2.62061	0.957435	9.3903	1.37751	0.876351	1.26204	0.380104	0.398963	0.133218	8.06032	0.23769	8.58618	1.69894	3.36342	1.19518	2.76478	0.658102	5.95969	1.59499	9.99827	2.31989	2.17564	2.75503	9.20808	0.69079	1.8264	0.281888	1.21302	4.04551
TCGA-S9-A7J3	1.41918	0	3.01962	2.48597	8.59217	3.07971	2.92102	1.08621	13.1624	1.54482	1.32116	9.31356	0.972042	0.509687	0.139628	11.8216	0.449386	13.6124	3.22871	2.11461	9.59189	2.18593	3.57332	6.87447	2.68054	16.3429	1.93043	0.740861	1.19626	9.90537	1.83598	2.73977	1.27641	2.20836	4.82973
TCGA-28-1753	0.10137	0	7.17896	4.64795	0.525296	3.34657	3.92075	2.22174	4.48777	2.70734	0.484937	10.0155	1.51648	2.0403	0.863676	3.21939	2.8686	8.17014	3.11242	2.96947	1.97953	3.41719	0.108198	1.61643	0.0235103	8.36779	2.44304	3.394	0.486712	3.84281	0.024035	2.03632	1.07886	0.195142	0.787563
TCGA-32-2615	1.32877	1	11.8334	9.25667	2.25563	4.34059	8.71045	5.41544	3.40281	2.90238	0.802209	13.5747	1.09436	1.22111	0.689082	8.74127	2.36561	10.2926	5.32401	3.06886	1.18483	4.83053	0.372901	0.485611	0.11618	15.8235	5.33879	5.33299	0.60129	4.23593	0.164454	1.29857	4.3322	0.0333804	1.58557
TCGA-S9-A6WN	1.32603	0	3.2689	1.1815	0.111229	2.25267	0.972517	1.10624	16.5326	2.22358	0.872803	2.98366	0.241905	1.03705	0.337191	2.76747	0.871315	6.88123	1.0168	1.20229	11.4109	1.17229	0.904301	1.74605	2.89943	8.02019	1.06797	1.52339	0.422357	8.27585	3.49415	0.939133	0.152197	0.549853	4.52342
TCGA-DU-8165	1.59452	0	15.8521	3.56955	0.722821	6.16525	5.60819	1.3498	3.33632	5.86013	0.634333	14.0075	1.34767	0.955745	1.03172	2.32666	3.22959	17.2932	7.23312	2.35645	0.0551799	4.93264	0.291148	0.275041	1.49892	6.60567	6.63944	3.81805	0.306959	6.14546	0.044097	1.69924	6.01915	0.228242	1.51184
TCGA-S9-A6U0	1.91233	0	7.89936	2.55351	0.777004	2.52621	1.21402	4.9814	2.00621	3.2073	0.769909	4.02181	0.561486	2.78551	1.36962	2.36261	2.66372	6.16196	3.59097	1.36113	0.209656	3.4587	0.195893	1.11065	0.287944	6.58848	2.67062	3.26407	0.485954	4.69297	0.166383	1.45173	4.53331	0.046761	1.85614
TCGA-HW-8322	1.48493	0	3.25694	2.15399	3.41964	4.45829	4.51644	0.759205	16.1738	2.23256	1.09428	3.96556	1.49166	0.26381	0.488038	16.6389	0.147766	14.1525	1.77828	2.18999	14.2639	2.06922	2.66158	13.7232	5.60506	15.4607	1.838	0.588131	4.65473	11.631	1.72279	3.08574	0.323997	4.27529	3.07937
TCGA-QH-A65S	0.210959	0	6.67897	2.90415	6.91699	2.35989	1.45921	0.436383	11.9519	1.47025	1.02502	10.7601	0.478801	0.557133	0.124399	8.0449	0.271894	6.90053	6.74247	1.98568	1.59474	3.69129	0.58696	2.86191	2.76053	11.3125	3.63823	2.42881	0.980167	7.29467	0.406912	2.53018	0.696326	0.666079	5.84234
TCGA-E1-A7Z4	12.0877	1	7.10975	5.55625	1.40996	3.57075	2.34896	3.05109	11.1362	1.49203	0.934876	22.2202	0.958227	0.347628	0.0228008	4.24622	0.156624	10.5685	1.4539	1.69562	2.0406	3.99402	0.207945	4.65573	3.58652	15.4884	2.89145	3.18649	0.950028	5.59583	1.18369	3.6263	0.133519	0.621164	4.80889
TCGA-HT-A61C	1.47123	1	7.98451	6.36804	1.66102	6.9568	4.6381	3.31931	4.75077	1.16671	0.801726	22.0582	1.08851	1.4298	0.575844	7.67368	2.36823	6.75669	6.92412	2.68715	3.50737	4.79671	0.422015	6.54199	0.346421	11.0689	4.01582	2.92275	0.224114	5.19876	0.552061	3.14219	1.61519	0.431308	0.970213
TCGA-HW-7487	1.12055	0	6.58705	1.46212	10.9818	2.80053	1.33261	1.51237	20.2842	1.39089	1.63088	4.62596	0.461599	0.321496	0.996273	16.1027	0.301532	27.7936	1.40307	1.86071	6.07468	2.34628	8.02697	3.76931	2.9524	13.1176	2.34609	0.602956	1.11663	9.26813	2.8635	2.05996	1.96434	1.36038	4.25707
TCGA-QH-A870	1.08219	0	6.63399	5.30001	3.17187	3.15472	2.49789	2.1795	12.2534	1.40721	1.01639	13.1628	1.04824	0.18522	0.115091	3.8092	0.282163	11.1478	1.81723	1.16696	1.54234	3.58861	0.161981	2.47067	2.70313	11.8523	2.56665	1.37979	1.37988	7.25252	0.949938	3.79347	0.528596	0.626649	9.25883
TCGA-DU-A7T8	11.5863	1	6.54024	6.71673	2.23258	3.54843	3.12913	0.93484	14.2899	0.847433	1.10342	20.5678	1.61747	0.304337	0.0630359	19.0713	0.153084	9.1427	4.17262	2.19137	6.75529	2.22277	0.774507	6.40684	1.98655	14.4543	3.93932	2.42368	1.72854	6.1004	2.81131	4.06694	0.30399	2.54534	2.13912
TCGA-TM-A84J	2.0137	0	4.65995	5.4618	1.01215	3.38692	4.03593	1.58022	10.8099	0.491876	0.6103	5.50214	1.01616	0.274671	0.0978624	6.01654	0.305563	10.832	2.33401	4.7723	6.91991	4.85778	10.7609	1.79624	1.99444	8.14211	3.24339	0.946208	2.30968	8.96996	0.168974	4.10371	0.220647	1.37191	0.892043
TCGA-HT-7603	1.93151	0	10.103	1.62379	12.8227	0.936947	0.18861	0.33102	24.1271	0.430563	2.25207	6.23364	0.114425	0.0867445	0.8882	14.0195	0.296082	27.2383	2.69505	1.51714	2.08341	2.25729	10.6517	2.86532	1.5738	7.41969	3.94985	0.628505	0.101309	7.43845	3.86621	1.41344	1.73772	0.282705	5.62222
TCGA-19-1390	2.11507	1	8.92351	5.67112	1.68647	8.10242	10.5421	7.57873	7.77576	4.04688	0.764032	12.5522	1.55475	0.487796	0.144736	9.27191	4.11011	9.2935	3.58063	4.74984	4.14323	5.4527	0.344475	6.18352	0.13209	10.5906	3.00606	0.704514	0.708051	6.99358	0.0385823	5.19351	1.81057	0.755721	0.962813
TCGA-32-1980	0.0986301	1	7.83143	3.33777	8.07432	2.13285	1.8701	2.75911	8.01135	1.58311	1.25157	8.11028	0.423242	0.93814	1.61574	7.55278	0.658721	14.1647	2.28783	2.39606	4.68841	3.04747	5.26821	0.482936	0.518447	7.79629	3.44601	7.67153	0.187826	3.58976	2.61828	0.864899	3.67679	0.0860649	2.35423
TCGA-06-0168	1.63836	1	6.48514	1.37941	3.51502	2.62448	1.4692	3.06334	2.68839	2.28081	0.762565	4.89456	0.21405	1.09802	1.40608	4.79006	0.749568	7.72553	5.99811	2.75869	0.553259	3.58629	0.612509	0.894963	0.212381	5.41474	3.94719	7.92926	0.219837	3.62667	0.347393	0.596803	3.68574	0.0881409	1.2121
TCGA-06-5412	0.378082	1	10.274	3.12448	0.67538	2.31974	0.805324	2.45041	1.68542	4.46221	0.737543	18.6977	0.406262	1.26806	1.68753	3.29848	0.240874	7.28627	16.8217	3.42848	0.0972291	4.40909	0.345063	1.26927	1.40337	8.20211	2.19606	15.2911	0.0772676	5.3636	0.315427	1.04085	3.45455	0.0660897	2.52219
TCGA-E1-5305	6.66575	1	7.07968	1.23573	3.58085	1.61239	1.45241	0.836675	32.1828	1.20174	0.746454	1.83717	0.151505	0.307304	0.364107	6.61648	0.167825	19.979	2.74818	2.87805	0.604378	1.87624	1.48245	3.8817	2.17969	6.96498	1.88745	1.11579	1.91722	10.5366	0.570805	1.48954	0.95858	0.409966	7.70332
TCGA-CS-5395	1.75068	1	4.36397	0.626875	2.70953	2.43592	0.997479	0.279511	14.6914	6.46954	0.840563	5.67009	0.138617	0.409603	0.641194	4.94196	0.295274	19.8621	4.42469	1.45506	0.119704	4.47847	3.35129	0.610074	0.0532398	5.50556	2.80679	0.911035	0.654417	9.14584	0.190498	1.4219	2.28025	0.139936	6.47881
TCGA-DU-8158	0.424658	1	8.60091	1.6904	3.04227	3.44942	2.97555	0.690293	4.08057	4.92435	0.725694	20.2681	0.540864	0.626426	1.5115	3.29704	0.510047	5.10659	6.83222	1.65558	2.06598	2.72759	0.412567	1.16969	0.777213	6.6246	3.15405	3.27404	0.159622	6.24599	0.208098	0.613253	7.20516	0.171517	2.77805
TCGA-E1-A7YN	1.99178	1	12.0416	4.64445	6.96256	4.31873	4.14202	0.847279	3.29413	3.70941	0.628478	4.83125	1.28139	2.22099	1.42403	4.3317	0.370793	6.12753	3.85034	1.35073	1.16548	1.88167	1.41499	0.815531	0.47366	14.8772	3.04128	2.79223	0.306429	5.90442	0.39503	1.31017	3.00557	0.124152	2.85327
TCGA-S9-A7R4	2.50411	0	4.58108	4.49297	1.83766	2.73653	2.58263	0.296328	17.7966	1.19135	0.748928	6.84637	0.562257	0.540044	0.061222	9.71034	0.322238	13.6171	2.2467	2.07951	2.94787	2.96085	0.385527	5.70594	3.8997	13.0696	3.0794	2.40637	3.08351	9.26791	0.808419	2.5084	0.316331	1.61393	3.88409
TCGA-W9-A837	4.25479	0	4.86184	1.8436	4.13373	2.86274	2.44645	0.747552	14.6531	2.27073	1.76622	7.56364	0.917799	0.130599	0.389035	12.2949	0.289749	19.9366	2.22384	2.04621	5.58516	2.21105	4.77682	5.12765	3.97854	11.9188	2.04385	0.621663	1.33842	9.68149	2.64828	2.26901	1.22452	1.50071	7.41791
TCGA-P5-A77X	0.287671	0	3.82457	1.87014	10.026	4.24751	2.55707	0.825474	12.7331	1.59863	2.76825	5.53773	1.32423	0.187275	0.591831	8.36604	0.218496	18.3098	1.22064	1.60461	9.04159	2.23444	6.67055	5.75657	1.43838	17.7556	2.17372	0.791761	1.83723	11.4259	2.64875	4.67197	0.561589	2.18498	10.2099
TCGA-FG-6689	0.520548	0	4.43506	1.87439	6.16403	2.82285	1.16051	0.652555	19.7989	1.19151	1.42687	8.37602	0.28068	0.377096	0.458695	7.48608	0.198451	20.8606	3.14609	2.22242	1.07095	2.50411	4.38156	3.36006	2.65867	7.95481	3.43359	2.50003	2.43106	5.64808	1.29067	2.21235	1.1463	0.582512	5.98445
TCGA-HT-7469	0.961644	1	8.71284	5.37596	0.59951	3.7844	3.44163	0.548645	9.87926	3.57009	0.519285	6.46477	1.50538	0.792698	0.0613804	9.11353	1.66851	21.0468	4.65726	3.42109	0.178905	3.71358	1.39948	0.0495913	2.41487	12.9805	6.33791	1.14647	2.7658	12.961	0.0731484	5.5229	0.12686	0.296948	9.52094
TCGA-DU-7009	11.5233	0	3.99024	0.724048	11.1141	2.67123	1.99359	0.478851	18.9101	2.06008	1.13359	3.22734	0.454841	0.233322	0.539266	8.94465	0.273048	21.4523	1.30642	2.63759	1.16556	2.44245	5.3147	3.35506	3.06159	10.9683	1.63618	0.584103	4.49386	11.9671	1.69783	2.08172	0.475941	1.10878	6.30243
TCGA-HT-7677	1.35342	0	3.22406	1.86459	7.489	4.51838	3.09829	1.02883	13.8681	1.94042	1.1993	6.11375	0.792966	0.286459	0.0566644	16.2668	0.212313	13.3928	0.847614	2.13923	7.24094	1.8732	2.00367	11.0516	4.67638	15.1598	1.84648	0.822857	2.89629	11.2803	1.35945	3.08111	0.499271	4.14519	4.65392
TCGA-HT-7684	0.50411	0	5.89667	1.93119	4.5346	1.74479	0.421399	4.28208	12.2937	0.343294	0.632894	10.2856	0.163718	0.589883	0.0612048	13.3651	0.496872	9.31884	10.5613	1.77583	1.18386	2.29163	0.455193	1.95749	3.15137	9.37645	3.75769	1.69814	0.112096	7.97019	0.398561	1.99152	0.36142	0.399998	6.59371
TCGA-DU-A6S6	7.92603	0	4.29656	2.48635	3.27541	3.91588	3.29446	0.654342	13.7579	1.15995	2.76962	6.41827	1.42065	0.12493	0.459779	10.2447	0.216051	15.4696	2.73689	1.53354	9.34254	2.44951	8.14425	3.789	2.18765	13.6308	1.63637	0.484163	2.75761	6.9078	4.93408	2.76165	1.00671	2.10596	3.54665
TCGA-32-2632	0.736986	1	9.08093	2.46211	0.877169	4.56423	1.71951	1.44837	2.20386	4.65706	0.823122	11.4293	0.504809	3.11864	2.28532	3.60562	36.8821	8.06045	28.785	2.80453	0.119208	4.59054	0.260886	0.542518	0.0582411	5.97237	3.31662	4.82	0.0602856	5.40525	0.285796	0.928102	7.75547	0.0918491	2.16055
TCGA-12-3650	0.912329	1	11.6129	4.88615	1.26065	3.22138	1.53338	2.72833	2.67196	0.997714	0.445403	27.845	0.473879	0.972352	0.44036	4.09033	2.77839	7.38955	6.55653	3.61719	1.91601	9.67323	0.467392	4.25465	0.112844	5.42091	2.68614	1.97779	0.900377	4.88338	0.442223	1.71595	1.86733	0.187327	1.90756
TCGA-06-0130	1.07945	1	18.5531	7.41918	0.207755	3.449	3.49909	2.59689	1.46623	2.72579	0.675444	10.7484	1.45766	4.13174	1.94767	2.63772	12.0581	8.21956	3.94979	3.12944	0.0253884	2.69188	0.284661	0.072627	0.163732	11.4888	4.10233	9.04714	0.0988629	1.87671	0.970836	0.883305	0.26411	0.502835	1.4423
TCGA-HT-7681	3.72329	0	4.47844	0.909946	7.59509	2.79773	1.17567	0.571293	14.8306	1.02617	1.91794	3.05585	0.275631	0.201988	0.662416	11.5558	0.391601	16.4136	4.05496	1.54655	1.6335	2.37332	6.43062	4.50058	2.60355	10.6686	2.14828	1.25248	0.778477	8.13099	2.88532	2.0195	1.82543	0.472154	7.51564
TCGA-HT-A616	0.150685	0	6.61365	3.60381	3.73625	1.70442	1.09063	0.29645	18.4845	1.00497	2.37772	6.94617	0.48996	0.154764	0.735378	14.326	0.34935	20.7096	4.58642	1.48372	2.79691	2.60077	7.50218	2.491	2.23513	8.70541	3.81642	0.917934	0.506097	5.88852	2.93623	2.02736	1.28676	0.862674	5.4838
TCGA-DU-7019	2.19178	0	6.98161	1.48744	1.38475	1.83589	1.11012	0.385315	17.6151	1.268	0.538566	3.48962	0.210813	0.457743	0.344016	4.97436	0.355445	17.7033	0.683728	1.90138	0.403624	3.4505	1.59012	2.43982	2.24663	7.8612	2.30867	1.58597	0.501186	12.1258	0.427675	1.76361	0.54295	0.466191	6.65847
TCGA-HT-8113	2.46575	0	5.02793	1.34718	8.81338	1.71294	1.50239	0.634629	26.808	1.07834	2.30613	2.47024	0.507885	0.0894685	0.735481	8.81522	0.581442	34.7672	1.75334	1.00146	12.1266	2.5789	14.444	1.34332	0.872178	9.41827	2.41328	0.548744	0.463936	5.82309	6.69722	1.45984	1.61711	0.337834	4.41859
TCGA-HT-7873	0.816438	0	6.75829	3.88985	10.9937	3.46556	4.94718	0.833281	9.29966	0.775179	0.817083	11.2322	1.45889	0.415764	0.0357104	5.66333	0.912285	11.1126	6.91998	2.06606	3.4753	4.16621	0.310878	4.2092	2.33211	10.079	4.40648	2.33186	3.77705	8.61326	0.0657699	3.30386	0.670961	0.704199	4.72677
TCGA-HW-8320	0.745205	0	5.79015	3.70544	2.83705	3.21369	3.03618	1.64387	13.3579	0.782801	0.629092	6.45507	1.05861	0.256003	0.0407059	9.7853	0.152519	12.9114	2.29898	2.43018	1.32901	3.67524	0.353194	4.91999	3.06703	11.9487	3.57344	2.15944	4.70768	8.07614	0.369384	3.78396	0.175271	1.49604	5.40812
TCGA-HT-A74J	0.876712	0	6.55969	4.83369	5.49909	2.60246	1.74274	1.12107	15.1328	0.956744	1.45682	4.92617	1.13258	0.359298	0.369204	12.6457	0.647528	8.42397	2.91955	1.44533	5.69368	2.33961	1.09254	4.57467	1.22591	17.2651	3.47399	1.77992	2.4548	6.58594	0.815619	1.72175	0.754947	2.03507	3.73604
TCGA-RY-A845	1.63288	0	6.02594	4.79851	5.21792	3.21932	4.17957	0.71992	16.7142	1.28171	1.44442	10.6455	1.18529	0.33408	0.109561	12.8928	0.30104	11.8541	3.51305	1.63928	5.19305	2.95853	3.47223	5.40726	2.86775	14.9664	4.47252	1.83513	1.66213	8.68426	2.26587	3.04895	0.51326	1.88097	7.20859
TCGA-E1-A7YW	3.06849	1	5.83867	5.67083	3.55061	2.80314	4.3705	1.01863	14.0724	0.84797	0.790116	9.76164	1.24363	0.321435	0.0868114	13.6041	0.614399	11.2463	3.61506	2.24505	8.79828	2.35845	0.631496	4.29244	2.45764	19.5114	5.36264	2.81003	2.25242	6.72505	0.669996	4.21979	0.299034	1.35569	4.5674
TCGA-DU-A76O	1.43014	0	4.82509	5.57464	2.92108	3.96357	1.88701	1.43739	10.5667	1.36216	2.29846	9.44255	0.577334	0.390684	0.166665	10.7545	0.150914	10.5003	4.14471	1.8999	5.00296	3.57949	0.497167	3.38791	1.06309	13.5357	2.89156	4.23881	2.12337	5.02792	4.69548	2.30743	0.353073	0.860979	3.48631
TCGA-S9-A6UA	0.487671	1	7.76568	3.33702	0.795036	2.82107	1.78542	0.482035	4.19337	2.37167	1.05264	8.18085	0.365231	1.26044	1.02744	4.82461	0.348426	8.54165	4.09083	4.70531	0.435159	2.09859	0.266321	2.10275	0.834325	9.88275	2.79694	5.98344	0.905049	4.67709	0.249852	1.3025	3.07978	0.307783	1.45599
TCGA-HT-A74H	0.20274	0	10.684	3.92703	9.22103	2.49898	1.07364	1.29933	8.0439	1.64456	1.86524	14.5602	0.850637	0.565852	1.1195	4.90809	0.526861	6.24357	3.72446	1.79906	1.82287	2.23895	1.94828	0.367693	0.974625	12.9558	4.22235	3.39493	0.052002	4.70367	1.66405	1.29379	9.7497	0.145947	3.80215
TCGA-S9-A6WE	6.04932	0	2.95317	1.89142	11.953	2.88676	2.16513	0.65808	11.0931	0.807063	1.0121	8.20816	0.358489	0.295071	0.228913	20.7381	0.14555	12.7411	1.59237	2.42313	7.39548	1.78503	0.879368	11.0901	3.14454	11.91	1.69905	0.635124	0.773713	9.74938	1.32805	2.3159	0.180644	1.74574	4.88635
TCGA-S9-A6WO	1.55068	0	5.03229	4.75768	4.92077	3.10608	2.81096	1.12999	16.7523	0.736057	1.04138	12.031	1.17374	0.604476	0.0259982	13.1232	0.135294	10.8593	4.54707	2.74991	6.33618	2.63554	0.365538	4.40402	2.4365	16.4919	3.79319	3.09903	4.52745	7.39742	0.50476	2.6382	0.161198	1.84418	4.36796
TCGA-DU-7306	3.49863	0	5.10258	0.985289	3.15577	2.09822	1.11381	0.428846	16.792	1.00405	0.338757	4.0258	0.212284	0.477616	0.0566863	4.13738	0.514221	14.6019	1.72849	1.98095	0.268159	2.35179	0.0612217	1.63911	2.025	6.65319	2.22272	1.00713	0.994492	11.4922	0.105776	2.00711	0.129491	0.300581	5.39156
TCGA-HW-A5KK	1.06301	1	7.73108	4.49944	13.3429	3.22416	2.79462	1.03806	7.73922	2.44813	0.858892	11.2029	0.773836	1.07172	1.33946	4.68584	0.493118	8.24017	4.96129	1.39064	0.90568	2.71574	0.451507	1.6522	0.987175	10.0899	3.05868	4.55584	0.366629	5.26521	0.411158	1.42733	5.43758	0.303474	2.02429
TCGA-WY-A85C	3.90685	0	7.27153	7.35792	1.83252	4.06015	2.94855	0.413779	18.2253	0.874835	0.870127	7.16206	0.850664	0.871398	0.135559	13.2632	0.283703	6.19894	3.40419	2.87877	6.2272	3.86767	0.189345	5.33406	3.86621	19.4272	4.83172	1.06169	3.80465	7.55249	0.714418	4.11438	0.802653	3.30322	5.05012
TCGA-CS-4941	0.641096	1	7.34524	2.4924	2.33196	3.00941	1.97229	0.509547	5.95018	5.45887	0.667791	10.1744	0.547106	2.03414	1.44697	4.66196	0.704366	13.3558	4.05117	1.31765	0.129974	4.66044	1.64589	1.32788	0.175625	5.80417	3.93573	3.67091	0.123948	8.74167	0.359089	1.9451	4.17616	0.0463824	2.34238
TCGA-E1-A7YV	2.70411	1	7.77786	4.33459	0.528325	5.24298	5.57327	0.793853	10.3814	1.11519	1.17056	10.7007	1.47458	0.284887	0.15464	8.22209	0.139488	16.2934	8.21721	2.84066	2.19773	4.1764	0.711692	4.40131	4.4265	11.0736	4.08672	0.648872	8.49468	10.8803	0.17405	4.67058	1.1275	3.24134	3.30043
TCGA-15-0742	1.14795	1	12.4431	4.87217	0.281901	6.31166	4.69427	6.67018	2.41628	1.78587	0.744832	23.339	1.47988	2.4184	0.38885	4.35253	6.53265	7.32432	11.9224	3.12751	0.655726	7.06488	0.209032	1.86277	0.0469869	12.9336	5.017	2.0978	0.303977	4.66097	0.0600444	1.06757	4.7044	0.0633756	0.692267
TCGA-06-5417	0.424658	0	8.64995	3.96571	1.60003	2.62118	1.85771	0.96167	6.7118	1.00069	0.574425	8.10176	0.368087	0.277676	0.138763	7.68832	1.25648	10.4436	4.92974	4.76397	0.259837	6.86508	0.105461	5.00296	1.5468	8.19167	2.20291	1.89826	3.66919	11.1941	0	1.8875	0.322642	0.927251	3.01192
TCGA-26-5135	0.739726	1	8.92671	6.11182	0.705094	4.58833	5.40941	4.92101	4.34506	1.66271	0.875008	18.0952	1.14734	1.27667	0.676655	5.01486	3.28889	6.81352	5.60913	3.8342	2.63157	5.68391	1.22994	4.0273	0.0977762	10.2897	4.20733	5.32796	0.542189	4.47636	0.157077	1.71412	0.978949	0.904319	0.758187
TCGA-06-5418	0.227397	1	14.0829	6.19397	3.75594	3.29089	3.91814	9.2511	3.79305	4.98825	0.367132	17.7877	1.08709	0.76904	0.909663	7.47784	2.5684	9.93068	5.08967	4.17688	0.114261	5.13323	0.147444	4.03838	0.0427176	15.1559	2.2048	5.24976	0.442172	6.873	0.0327532	0.932581	1.1227	0.00443209	2.14316
TCGA-28-5215	0.917808	1	9.00868	1.96487	1.55868	3.06386	1.45286	1.42942	6.80847	1.69337	0.793772	12.2277	0.160423	1.39604	0.617578	2.82884	0.205092	5.2036	4.0193	4.11858	0.888532	3.92443	0.122089	2.28484	0.875447	7.27236	3.08862	4.25344	0.549199	4.79126	0.144644	1.65451	3.63737	0.341302	1.60181
TCGA-06-0152	1.0274	1	6.79287	3.55094	0.13078	3.8317	3.47136	1.90777	4.46253	3.80208	0.969631	5.03555	0.910879	1.13988	0.681848	2.79604	3.16236	9.85966	1.83066	3.41307	1.45195	4.60783	0.85459	1.05152	0.0691414	8.5688	2.38737	4.70798	1.03519	6.57631	0.323129	1.43347	1.77184	0.0819845	1.12743
TCGA-HT-7884	0.939726	0	6.31969	4.86264	14.7827	4.39392	4.18426	1.1589	13.6258	1.79214	1.0878	8.34708	1.94392	0.239018	0.0661921	8.31678	0.339385	12.7348	4.60793	1.37797	8.3902	1.97603	1.10145	6.4214	2.58894	30.6812	4.7919	1.25119	2.21086	7.65843	2.32029	3.88618	0.604821	2.67179	7.5002
TCGA-VM-A8CH	1.95616	0	4.93427	4.58648	2.92854	3.81129	2.61182	0.562349	10.5513	0.833862	0.781694	6.71162	0.472903	0.845507	0.104979	7.08421	0.604265	11.5024	2.79403	2.37739	1.27281	2.54964	0.277513	2.97152	2.79269	18.2141	3.66441	1.13974	2.63325	9.31303	0.208057	2.83733	0.141502	1.04169	5.70228
TCGA-P5-A72Z	0.969863	0	2.16474	2.31368	0.833576	4.00739	3.68894	0.900761	4.66222	0.364319	0.94828	3.65584	0.835362	0.263614	0.0128077	16.8804	0.0279933	12.0585	1.08502	3.66567	1.50537	2.34807	0.430726	15.1548	1.87978	18.5263	1.013	0.271449	1.76515	9.56902	0.681121	2.71972	0.019853	1.0698	1.20794
TCGA-FG-8191	1.29315	0	4.32641	3.48964	6.52261	2.39523	2.064	0.585324	12.8283	0.977349	0.699368	6.53666	0.695098	0.212243	0.145838	8.6543	0.96868	10.9742	3.40576	2.14475	2.27635	2.55568	0.624723	2.22159	3.02966	5.73803	3.2962	2.12022	1.41291	5.73059	0.444866	2.29989	0.438423	0.85527	4.46684
TCGA-FG-7641	0.857534	0	3.43252	1.55375	12.9658	3.04937	2.38895	0.756422	20.0065	1.94542	1.85366	4.85188	0.715882	0.162745	0.544184	11.1506	0.329374	24.6356	3.98098	1.94967	9.55566	1.98093	6.78595	4.57657	4.20996	13.3706	1.99364	0.406498	2.05276	10.8334	2.43818	2.85668	0.830556	1.97097	5.48056
TCGA-28-5208	1.29863	0	8.24824	2.03767	0.365705	3.36794	2.13288	0.647476	1.95141	3.13159	0.420046	10.5507	0.248594	1.76482	1.0953	4.37573	0.906807	8.03394	4.94339	4.54696	0.0573701	8.65797	0.255407	0.54705	0.0513866	4.70716	4.20124	5.58929	0.731369	6.19652	0.0840534	0.793282	0.866058	0.0170609	1.2751
TCGA-06-0141	0.857534	1	11.2941	8.03529	1.61089	5.38841	3.48327	1.7956	2.05921	2.72242	0.364491	22.3911	1.10118	1.89408	2.25351	4.39769	1.00553	5.2921	5.72678	3.55409	0.674716	3.12066	0.550401	1.82007	0.477115	5.6892	2.56848	8.03372	0.135813	4.46708	0.136574	0.711091	1.33754	0.186128	1.99192
TCGA-S9-A6WI	7.08219	0	5.06551	1.44301	8.74686	1.66782	0.860647	0.670068	21.9493	0.51298	3.50517	7.33864	0.403461	0.149254	1.05354	11.2195	0.485184	28.367	1.76653	0.955771	6.61441	2.63282	16.8429	1.02444	1.18555	12.5928	2.52324	0.483823	0.179294	4.5358	8.20073	1.33357	2.83901	0.357832	2.27082
TCGA-06-5413	0.734247	0	13.2411	2.93319	0.553514	4.01073	1.59621	1.6298	2.66808	3.43557	0.685187	17.8356	0.526028	0.795297	1.71013	4.26245	0.781792	4.6666	4.4722	3.21101	0.754306	6.19813	0.127484	7.91191	0.0101345	8.94052	3.3913	6.24315	0.590078	6.00077	0.0725248	0.668705	2.39296	0.206092	1.83263
TCGA-12-0821	0.884932	1	9.8636	4.14708	1.29833	5.39246	2.93354	2.21184	4.23271	3.13476	0.317989	15.8762	0.822896	0.758722	1.27965	5.04772	3.16416	5.55619	5.84016	3.10204	0.744732	7.51125	0.9267	0.390574	1.142	6.40545	4.42159	2.13848	0.759523	5.45513	0.141845	1.02313	1.67413	0.0753	2.00945
TCGA-12-5299	0.268493	1	7.92321	2.90905	0.301808	2.10932	1.29232	4.45536	2.41042	3.85586	0.340942	10.4897	0.188625	0.549369	0.557929	5.96386	2.07596	7.81299	3.68471	3.75379	0.0535761	4.88252	0.232627	0.979171	0.0383906	5.29453	3.15014	4.90313	0.322874	7.04959	0.255108	1.01564	2.72264	0.0238989	2.01836
TCGA-06-2561	0.772603	0	5.97941	4.42626	2.25368	3.24255	4.0476	1.65286	4.07671	4.90807	0.91023	13.5852	1.65423	0.673474	1.91907	3.37169	0.925627	10.3716	3.21908	2.63062	3.0767	2.58251	1.0258	2.38639	0.133738	12.8104	2.01473	3.61623	0.660702	5.52449	0.348021	1.48335	2.5157	0.0605487	2.93013
TCGA-14-0871	2.41096	1	4.96167	4.52679	0.22101	3.39432	7.21697	0.885564	4.76535	2.07336	0.229533	10.9577	1.74961	1.97255	1.67114	16.4035	6.90113	7.3795	1.76783	16.2195	0.310595	7.27851	0.594068	0.592332	0.667682	7.53222	4.43183	0.415466	0.0863901	1.87422	0	0.617492	1.94977	0.166258	0.372774
TCGA-14-2554	1.45753	1	12.5537	4.61184	0.590806	2.76832	1.1428	1.46706	3.39204	3.81212	0.422503	18.6095	0.339507	0.649845	1.02701	5.59461	8.27411	7.84681	10.0284	3.18959	0.135652	5.19605	0.222129	1.33811	0.100555	8.44544	3.09789	6.31337	0.182149	6.30683	0.359797	1.40389	6.6447	0	3.40901
TCGA-28-1747	0.210959	1	8.63071	4.45854	2.49772	3.44225	2.25068	0.664173	2.76018	4.25324	0.830093	7.93327	1.06747	1.02343	0.934894	4.07943	1.62141	7.20843	3.05132	2.58745	0.582047	5.6539	0.538787	0.450335	0.0768293	8.66103	3.28086	3.36015	0.653252	6.1201	0.21319	1.91104	3.54393	0.109321	1.30386

## Sheet: Supplementary Table 3
Supplementary Table 3. 33 aging-related lncRNAs expression in CGGA.
id	futime	fustat	EPB41L4A.AS1	GDNF.AS1	HAR1A	LINC00092	LINC00237	LINC00265	LINC00339	LINC00665	PAXIP1.AS2	SLC25A21.AS1	SNAI3.AS1	SNHG16	SNHG9	SOCS2.AS1	WDFY3.AS2	riskScore	risk
CGGA_1240	0.0520548	1	3.12648	0.704332	0.374089	1.57648	0.212165	1.12784	3.45887	2.92213	1.92079	-0.0353457	2.87617	4.6657	5.92275	0.604605	0.708418	0.765803	high
CGGA_1283	0.0547945	1	4.86397	-0.0354485	0.655758	5.16828	0.550035	1.21258	2.09852	5.42594	0.657667	0.530028	1.29623	5.40633	4.1093	0.292834	1.21482	1.37924	high
CGGA_1059	0.0575342	1	4.18841	0.897093	0.419353	0.692974	3.18678	2.10835	3.61628	4.66578	0.436651	1.92763	2.38788	4.43784	5.71957	0.556935	2.9331	0.311334	high
CGGA_1215	0.0794521	1	3.53417	1.33255	0.54849	1.00577	3.49393	1.51058	2.91401	3.93316	1.25216	1.14159	2.18336	4.13923	4.87774	1.65938	1.69172	0.46923	high
CGGA_D36	0.0931507	1	4.39135	-0.0354485	0.145766	0.736792	0.539861	1.16224	3.82636	4.16877	2.14722	0.66353	2.19025	4.78623	5.07528	0.781457	0.324815	1.43431	high
CGGA_1534	0.112329	1	6.53261	3.44	3.21292	0.571308	4.05602	1.99757	2.80305	4.70697	0.915003	0.975804	2.78652	4.56597	6.42424	0.420406	0.997863	-0.267606	low
CGGA_1826	0.120548	1	5.09192	0.376209	0.453748	3.44168	0.523105	2.62227	3.38954	4.47081	2.44741	2.14099	2.01007	4.03219	6.09721	3.64224	2.82012	0.71807	high
CGGA_2008	0.120548	1	5.15818	0.266117	0.338256	2.99331	0.492881	0.724638	2.7191	3.50569	1.48776	1.47561	1.92324	3.82166	4.09259	0.64103	1.57439	0.533822	high
CGGA_1381	0.126027	1	6.10635	1.52227	0.145766	0.505167	2.9935	1.92872	3.35665	5.35956	0.925625	2.47701	1.47111	3.9872	8.1114	1.1031	1.28791	0.888331	high
CGGA_1688	0.139726	1	5.19445	2.38487	3.78364	4.55119	0.0669513	3.49804	3.00275	4.24412	1.31563	2.4314	2.96127	4.81376	7.41746	2.31564	1.941	-0.13149	low
CGGA_1134	0.161644	1	5.39122	0.365588	0.0601974	0.800446	1.43767	2.0488	3.16959	4.61452	2.75887	0.27258	1.36942	5.06977	5.59055	1.38215	1.27379	1.36745	high
CGGA_1320	0.161644	1	5.55796	2.50816	0.230785	4.34025	2.05538	2.88292	5.82154	4.54297	0.163206	2.17515	1.73625	3.35052	5.29492	1.16251	0.283595	1.2598	high
CGGA_D56	0.175342	1	7.85321	1.1798	0.975629	0.920846	3.73622	0.95757	1.91027	2.94877	1.51476	1.90824	2.59909	5.82212	6.25568	0.556935	1.06642	-0.0592476	low
CGGA_1068	0.186301	1	3.62351	1.59469	0.358736	0.601717	1.92908	1.49193	2.59819	3.2087	0.994692	0.785893	1.35599	5.56862	5.78321	1.31032	1.28371	0.720939	high
CGGA_P106	0.194521	1	5.79378	1.628	1.94231	1.45718	4.38902	2.21418	2.35733	3.69467	1.66432	1.64504	2.59641	4.98527	6.14796	1.07684	0.633932	0.252217	high
CGGA_1953	0.2	1	6.42884	0.183449	0.987386	3.26458	2.20178	1.40852	3.65207	4.11857	2.09463	0.0530871	2.59287	4.79176	7.70575	1.4879	1.95404	0.639387	high
CGGA_457	0.205479	1	5.4337	2.37254	0.287049	0.10898	4.9586	2.32687	3.20631	4.59215	1.30152	1.41255	2.04048	5.63889	5.86986	0.38746	1.48105	0.607067	high
CGGA_1514	0.208219	1	1.07522	0.322265	-0.0160446	0.698825	1.01318	0.843702	0.402793	2.37099	1.0637	0.0943621	1.42815	2.36827	0.489573	0.420406	1.62978	0.0646039	high
CGGA_1820	0.210959	1	4.74445	0.487928	0.0601974	1.63982	1.80624	2.76475	2.96312	4.98793	1.78673	0.648916	1.87439	4.375	7.15864	2.76141	1.60236	1.12543	high
CGGA_1285	0.216438	1	5.29535	0.401259	0.145766	4.48977	2.09406	3.17682	4.26698	3.97684	1.41999	0.530028	1.81833	3.26309	6.71124	3.50344	0.426821	1.40172	high
CGGA_1434	0.221918	1	5.13407	0.526404	0.39724	3.12408	1.56548	2.90318	3.1785	4.44982	2.66874	0.365224	2.58755	4.22342	6.01594	1.21937	2.28152	0.662976	high
CGGA_1541	0.221918	1	5.20755	0.678887	2.02807	2.91733	0.107896	1.63138	3.05593	4.2614	1.20639	0.602227	3.39306	3.70272	6.93088	0.963321	1.83208	0.0432893	high
CGGA_1074	0.235616	1	3.44845	1.64124	0.327618	3.60831	2.31151	2.46563	3.15102	4.55473	3.0306	0.338343	3.02979	4.90615	7.81198	2.0357	1.92325	0.7653	high
CGGA_1624	0.238356	1	5.48131	1.45102	-0.00303408	0.0184818	0.977753	2.64785	3.4769	3.58436	2.44086	1.35778	1.3127	4.97455	6.51906	1.49298	1.36818	0.9376	high
CGGA_1865	0.243836	1	4.89103	0.0954928	0.00985197	3.38403	2.49477	2.96103	3.11635	4.12225	2.48295	0.563741	1.72954	4.51858	5.91781	2.11828	2.40355	0.951879	high
CGGA_1387	0.246575	1	5.03202	0.478139	0.072495	1.15642	3.63583	2.44434	2.02649	4.551	3.69128	0.21146	1.1144	4.65005	5.46805	2.25188	1.67786	1.1686	high
CGGA_406	0.246575	1	5.51776	1.8978	0.368071	0.262603	3.12587	2.61048	2.75664	4.30999	0.942351	2.36691	1.84925	7.20694	4.83702	0.38746	1.76942	0.668108	high
CGGA_1375	0.252055	1	5.2357	2.25437	0.343247	0.704037	1.92058	1.15085	4.50976	4.39197	1.01852	0.588736	2.12046	4.70704	3.08868	0.595192	1.3575	0.732118	high
CGGA_1343	0.257534	1	6.60991	-0.0354485	0.197273	0.0178679	-0.0171181	0.717992	3.59337	3.58735	2.18748	1.67158	1.05178	5.44807	6.44509	3.07465	0.695875	1.37557	high
CGGA_1284	0.265753	1	3.30792	0.312445	0.389308	1.74994	1.19147	0.650605	2.86661	3.18341	2.67329	0.0911204	2.01911	4.40765	3.69541	1.82222	1.21041	0.892405	high
CGGA_D64	0.276712	1	5.38431	1.97669	0.145766	0.293452	3.74027	1.97895	2.4233	4.65281	1.15756	0.810837	0.925142	5.1127	4.51905	0.909322	1.49107	0.81669	high
CGGA_P29	0.282192	1	1.73145	0.591251	0.189663	0.498086	0.709319	1.0913	0.615387	2.58686	1.31563	0.376391	2.05407	3.47182	1.64099	0.271729	1.04771	0.18466	high
CGGA_1773	0.284932	1	5.5968	0.487928	0.307766	1.71118	1.02016	1.83949	3.04448	4.28625	2.39075	0.186258	1.99033	4.38035	5.55701	1.3089	0.989384	1.03396	high
CGGA_P28	0.293151	1	5.22848	0.687351	0.120592	1.20767	2.47055	1.74844	2.94195	3.83445	2.55766	0.805354	1.71904	5.14399	6.45937	0.6129	2.67873	0.568615	high
CGGA_1500	0.29589	1	5.64203	0.397209	2.31357	2.08103	2.41064	1.03162	2.97531	3.92027	1.39091	1.27738	3.02346	3.77345	6.37727	1.33184	2.01756	-0.0795812	low
CGGA_1011	0.29863	1	3.02767	1.91009	0.197273	2.40334	1.95015	1.59654	3.99599	3.17949	1.96127	1.12837	1.99681	4.44232	5.10945	0.632498	1.1002	0.838117	high
CGGA_1862	0.30137	1	5.33834	0.618133	0.0477864	3.25838	2.85246	2.66388	2.9022	4.52481	3.6512	0.134474	1.83328	4.1126	6.88529	4.55755	2.93577	0.81657	high
CGGA_P7	0.30137	1	4.61434	0.171223	0.387587	0.859415	0.147666	1.53509	3.50589	2.26028	2.29967	0.387472	1.38321	5.10269	5.34986	0.5745	1.48706	0.832154	high
CGGA_681	0.30137	1	3.31513	1.31159	0.374089	1.89089	0.466753	2.15687	3.18818	4.43601	1.299	0.569427	1.8424	4.21427	6.9212	1.14951	1.6949	0.858445	high
CGGA_1258	0.312329	1	5.9786	0.363792	0.263664	3.16993	3.50023	1.6487	2.07204	4.82442	1.80209	0.326922	2.42548	4.17978	4.72618	3.68527	1.0218	0.860494	high
CGGA_358	0.334247	1	5.48331	0.635767	1.29653	1.47107	1.88673	1.05431	3.10543	3.024	0.364138	1.26551	3.08517	3.96135	6.9125	0.668609	2.51597	-0.409419	low
CGGA_499	0.334247	1	5.4011	2.15731	0.263664	1.84707	1.98737	0.885795	2.86661	4.70688	1.77812	2.44488	2.09195	4.50674	6.49302	1.23823	0.922854	0.702211	high
CGGA_624	0.334247	1	3.38967	0.325436	0.230785	1.6468	1.80563	2.53618	3.01336	3.83999	2.10783	0.708411	1.92088	4.16491	4.27484	3.4704	1.1002	1.13165	high
CGGA_1099	0.334247	1	7.69888	0.754719	0.21411	2.46573	1.45835	1.41031	4.14312	3.06231	1.99829	1.30931	1.48976	5.02875	7.00109	0.095632	1.0517	0.869576	high
CGGA_1272	0.339726	1	6.31869	1.89545	0.781176	0.130521	2.82946	1.55636	3.83327	4.34908	0.858155	0.520011	1.81833	5.85973	5.91701	0.641681	1.32107	0.734509	high
CGGA_1458	0.347945	1	7.33149	3.76549	2.27835	0.82286	4.33921	2.82467	2.35733	3.44803	1.4108	2.55222	2.54962	5.44027	5.88655	0.398527	1.56305	-0.578277	low
CGGA_1866	0.347945	1	5.82233	0.785055	0.15557	2.50959	2.57408	3.2346	3.12563	3.50333	3.142	0.260564	1.60897	4.19234	5.71735	1.92658	2.75736	0.539542	high
CGGA_1575	0.353425	1	4.65778	2.23996	0.406824	0.338671	2.61869	1.77068	3.33044	3.7983	1.05535	1.61273	2.23287	5.03355	5.312	1.45178	1.47501	0.414598	high
CGGA_1558	0.356164	1	5.18437	2.77933	0.233817	2.98575	4.01977	2.96832	4.05542	4.33768	2.24071	0.0943621	2.26535	4.56306	6.40414	1.79768	2.20732	0.54755	high
CGGA_1481	0.358904	1	1.24377	0.0153486	-0.0291821	0.262603	0.0669513	1.19656	0.402793	1.53083	1.12083	0.0530871	0.788075	2.66327	1.64099	0.353726	0.980853	0.318862	high
CGGA_1255	0.361644	1	3.83038	0.158887	-0.0160446	0.929711	0.896464	3.39345	4.46703	3.76594	2.53317	0.0248904	1.39233	3.7364	6.03899	3.71346	1.9967	1.30194	high
CGGA_554	0.367123	1	6.57932	1.5715	2.49338	2.31083	1.3362	0.808172	2.06227	4.77695	0.643085	1.17322	4.13862	5.19217	7.20011	0.963321	1.02301	-0.231228	low
CGGA_D51	0.369863	1	4.41372	1.21003	0.840654	2.24941	0.237078	1.18479	3.41772	3.14985	1.88403	1.62972	2.65608	3.80831	4.40312	0.7219	1.74781	0.19971	high
CGGA_1248	0.378082	1	5.15365	1.4413	1.00587	2.24977	0.284434	2.02708	2.73174	3.80393	1.58454	1.07453	2.86763	4.00606	4.80563	0.831778	2.15938	-0.0234278	high
CGGA_525	0.378082	1	2.99931	0.232234	0.477932	2.17816	0.212165	2.3555	2.66038	3.83014	2.05855	0.169756	0.877331	4.5915	6.05648	1.5831	1.1002	1.39669	high
CGGA_1669	0.380822	1	5.00898	0.861487	0.955996	3.97703	0.619339	3.08987	3.04448	4.89566	2.48932	1.04701	2.57862	5.14513	6.47223	2.34369	3.27192	0.505072	high
CGGA_2013	0.380822	1	4.93801	0.254607	0.0601974	1.672	0.888832	1.12018	1.91275	3.10941	1.03003	1.82888	1.60513	3.46397	5.89373	0.504677	2.25721	0.114304	high
CGGA_309	0.380822	1	3.94133	-0.0354485	0.247302	2.90405	0.749829	1.39053	3.7845	4.42665	2.50097	0.207547	2.13459	4.29591	5.47372	1.1364	1.4616	1.2705	high
CGGA_1394	0.380822	1	4.35323	1.18741	0.448888	1.17197	1.76382	1.78452	3.04306	4.44944	0.792725	2.87582	2.96167	4.28776	7.19009	0.404107	1.53064	0.351836	high
CGGA_1374	0.386301	1	4.56505	1.87076	1.11094	0.250574	2.28124	2.31524	3.86915	2.35352	1.04194	1.72118	1.15051	4.42583	5.39268	0.901642	2.53914	0.072861	high
CGGA_1946	0.389041	1	5.6791	1.74235	0.297447	3.47916	1.2207	1.27522	3.79434	3.97643	2.83379	0.134474	1.66519	4.00518	4.56594	1.73067	1.23851	0.947292	high
CGGA_1334	0.4	1	4.41229	0.243	0.233817	4.38892	2.12869	2.84473	2.31165	3.66795	1.9646	1.98091	2.00727	3.50912	6.36591	1.58627	3.0508	0.248322	high
CGGA_777	0.4	1	4.5055	0.108408	0.0601974	0.830249	1.60254	2.40355	2.69129	4.33581	3.45278	0.376391	1.60897	4.49976	5.74184	1.02122	2.02993	1.04121	high
CGGA_1426	0.40274	1	5.19288	1.43151	0.444493	0.589015	3.79488	1.73492	2.63606	4.34699	1.37076	1.97005	1.7707	4.37231	6.77092	2.17262	1.20964	0.648799	high
CGGA_P25	0.40274	1	0.880638	0.183449	-0.0291821	0.0317837	0.440995	0.953111	0.402793	1.86189	1.12882	0.0248904	1.98463	2.34152	1.39985	0.222641	0.980853	0.0159464	high
CGGA_D34	0.40274	1	5.12983	2.53808	0.327618	1.23727	4.08787	1.59212	1.88144	4.51129	0.541627	1.48607	1.30629	4.54369	7.11386	0.870521	1.19708	0.455001	high
CGGA_1656	0.408219	1	5.14357	0.30008	-0.055848	3.15658	0.398039	3.83227	3.49899	4.77293	1.89504	0.0248904	2.46237	3.9458	6.63144	5.64876	1.1501	1.31596	high
CGGA_1184	0.427397	1	6.13404	1.13072	2.53334	2.62697	1.75805	1.56625	2.88929	3.75725	1.4108	0.6397	3.44499	3.72995	6.15986	0.89521	1.59681	-0.266377	low
CGGA_487	0.427397	1	5.01225	0.288852	0.0352599	1.35076	0.60062	2.85267	2.68261	4.2647	3.26183	1.00472	1.59355	4.38302	5.85071	3.51128	2.1405	0.997587	high
CGGA_1857	0.430137	1	5.36848	0.344097	0.287049	2.26014	2.81296	0.969183	3.62414	3.76979	1.08025	0.648916	2.19954	4.32934	6.5079	1.47767	1.17272	0.807251	high
CGGA_256	0.432877	0	4.37117	1.1798	1.42196	0.789992	2.65984	1.05691	2.46833	3.51258	1.55976	1.73442	2.23114	3.3491	3.68996	0.6689	3.17907	-0.418996	low
CGGA_876	0.435616	1	3.18777	0.662862	0.145766	0.831361	-0.15345	1.5473	2.63098	3.09533	2.42169	0.008032	2.15562	4.16842	5.66796	1.48717	1.17459	0.740872	high
CGGA_1572	0.438356	1	5.48181	1.16691	0.472069	2.40689	1.33065	0.928638	2.49294	3.38257	1.03852	1.57488	2.91255	4.38833	8.05353	0.756833	1.55162	0.0404762	high
CGGA_1208	0.441096	1	5.18406	0.322265	0.072495	1.53847	1.31948	1.73038	3.423	3.73672	2.33184	0.121229	1.18041	5.02237	5.30482	1.39309	1.38762	1.23565	high
CGGA_1015	0.449315	1	2.9207	0.204587	2.08324	0.161355	0.657828	2.24394	3.5876	1.13914	2.57137	0.760517	1.8424	5.18596	5.08193	1.07592	1.48742	0.422734	high
CGGA_252	0.452055	0	6.09726	1.74669	0.69434	0.376032	4.4348	2.20095	2.46515	3.86785	0.346348	2.21369	1.8898	4.77707	3.48075	0.338337	3.35133	-0.382505	low
CGGA_1262	0.454795	1	1.47272	0.0153486	0.120592	1.12116	0.0669513	1.11302	0.636975	2.14931	1.51869	0.121229	1.8236	3.53302	2.1026	0.247399	1.67786	0.158484	high
CGGA_P104	0.457534	1	1.38606	0.243	-0.00303408	0.158118	0.777318	1.14144	0.658205	1.67153	1.19882	0.107859	1.34609	2.93094	1.35053	0.0501771	0.865057	0.246925	high
CGGA_1702	0.460274	1	3.79951	0.487928	0.00985197	0.10898	0.0669513	1.48696	2.95081	3.77459	2.7049	0.0669788	1.31753	5.49536	4.07062	3.1029	2.64443	0.954389	high
CGGA_1129	0.460274	1	6.6104	4.35174	2.06595	0.810805	4.84758	2.56411	3.12748	5.08712	0.67607	0.883221	2.89149	5.49444	2.89783	1.38469	1.20153	-0.0842034	low
CGGA_603	0.460274	0	6.0924	1.86577	0.434183	0.821115	3.78552	1.38056	2.49366	3.08095	1.23618	1.92377	2.66731	4.68002	4.41297	1.00575	1.49107	-0.122529	low
CGGA_852	0.463014	1	5.27699	0.678887	0.0477864	2.85867	2.70589	2.67748	3.21641	3.98786	2.89305	1.22931	1.84607	4.41852	6.61424	2.11174	2.59276	0.702371	high
CGGA_1643	0.465753	0	5.38071	0.582172	0.50798	2.44123	3.81168	2.45767	3.32649	4.10451	1.25838	2.92766	1.74685	4.90154	7.1116	0.494414	1.31501	0.880319	high
CGGA_700	0.465753	0	6.60095	3.42181	1.17967	0.636527	5.18334	1.70349	2.08721	4.23647	0.792725	2.22631	1.58973	4.37924	5.00339	0.695634	2.70339	-0.493707	low
CGGA_1505	0.471233	1	4.19882	1.28659	0.0352599	0.589015	1.21467	2.2331	3.32385	3.56989	2.23694	0.667171	1.65414	4.26838	5.38935	2.5136	2.33888	0.608709	high
CGGA_1314	0.471233	1	5.12273	1.90522	0.145766	0.176561	0.997518	0.872418	4.12355	4.80215	0.384713	2.51105	2.05581	4.74679	10.317	0.30434	0.970562	0.856751	high
CGGA_1644	0.473973	1	6.34067	0.73707	0.144012	1.91195	0.572058	1.21666	3.33307	3.95074	1.38422	0.173487	2.05137	5.64547	8.18962	2.7961	0.846379	1.07001	high
CGGA_1597	0.476712	1	4.92487	1.09981	0.0846813	2.37641	1.70389	1.66996	3.4291	4.1818	1.22143	0.729282	2.01565	4.44551	7.69467	1.10385	0.989384	0.952629	high
CGGA_D33	0.479452	1	6.02835	1.94848	1.12093	1.46858	0.886734	1.17918	2.85594	3.48085	1.49832	1.19966	1.31632	4.32014	5.18725	1.22587	1.88203	0.22852	high
CGGA_1430	0.482192	1	3.83683	0.133879	0.072495	4.04495	4.02694	2.66843	3.76656	4.34946	1.56687	0.260564	1.13679	5.67019	4.40819	1.50813	0.946212	1.80543	high
CGGA_1899	0.482192	1	6.07768	1.58475	2.10058	3.65805	1.37446	1.04679	3.33175	4.7154	1.12882	0.430953	3.68759	4.30979	7.25952	2.70234	1.25273	0.17401	high
CGGA_1260	0.484932	1	5.15753	1.7999	0.51681	2.72773	1.79036	0.886838	2.86874	3.53818	1.60778	0.877566	2.57862	3.60228	6.93255	2.24891	1.55735	0.158361	high
CGGA_D58	0.49589	1	5.60696	1.22493	2.49032	2.52218	-0.15345	0.688367	2.00247	2.78325	1.56291	1.33261	3.39318	3.04303	6.24839	1.3336	1.93673	-0.779016	low
CGGA_1475	0.49863	1	2.54092	2.12786	0.21411	0.670624	2.89989	2.73201	3.54093	4.17825	0.935711	1.46511	2.53475	5.32097	6.50371	2.12011	1.87644	0.63957	high
CGGA_165	0.50137	0	6.08931	1.91173	2.41187	1.88501	2.00788	0.449462	1.31222	3.63537	0.337204	1.54092	4.44946	4.71469	7.1317	1.46737	0.892624	-0.782094	low
CGGA_P175	0.50137	1	1.11555	0.277532	0.072495	0.349199	0.888832	0.861122	0.548357	1.94568	0.969204	0.186258	0.886274	2.93675	0.664436	0.078121	1.4068	0.236156	high
CGGA_413	0.50137	0	3.88431	0.13333	0.145766	1.60239	1.10105	3.7577	3.05776	3.67622	3.15797	-0.0353457	1.7529	3.73405	4.8164	4.78805	2.58111	0.870154	high
CGGA_1275	0.50137	1	5.8199	1.68089	0.145766	0.542033	0.811188	0.845349	2.44915	2.27441	1.36634	2.44758	2.20396	8.165	6.28178	1.87549	-0.0327312	0.804849	high
CGGA_1486	0.50411	1	1.02506	0.0153486	-0.0291821	0.170131	0.482658	0.472739	0.571091	1.48769	1.13676	0.0248904	1.13679	2.42587	1.16081	0.0501771	0.855748	0.233076	high
CGGA_1542	0.50411	0	1.09957	0.14644	0.276569	0.32806	0.591164	1.01628	0.402793	1.28022	1.14466	0.236224	1.41929	2.26752	0.686008	0.158779	1.11158	-0.0564247	low
CGGA_1815	0.506849	1	4.98292	0.20758	0.720609	2.64656	0.656035	2.51987	2.77702	3.93729	1.86628	0.658073	3.0082	4.12635	6.49241	3.32736	2.02582	0.418014	high
CGGA_1462	0.515068	1	4.58673	0.30008	0.132353	1.15642	3.13648	2.38409	2.6473	4.19158	1.92326	0.308032	1.95576	4.47758	6.32329	0.933454	1.17272	0.965765	high
CGGA_1270	0.515068	1	5.85684	1.05289	1.18927	2.33023	-0.15345	0.29582	2.87988	3.91163	0.73566	0.760517	3.09132	4.22702	6.68198	1.60735	0.851058	0.26699	high
CGGA_1564	0.520548	1	4.38638	1.36096	0.0477864	2.44123	3.26617	2.92399	4.56872	4.52697	2.06952	0.173487	1.80402	4.09211	7.40215	2.33813	1.1876	1.33687	high
CGGA_1236	0.523288	1	5.60021	1.33486	1.42352	1.98654	0.963323	2.17878	2.81096	3.30273	1.36398	1.75479	2.78194	3.02478	5.64474	0.484076	2.84122	-0.542425	low
CGGA_1384	0.523288	1	5.56993	2.0181	0.389308	0.114887	4.30898	1.8159	2.1906	4.25588	1.06039	1.72118	2.14162	4.14191	5.03282	0.556935	3.14085	-0.332551	low
CGGA_1257	0.526027	1	4.33911	0.712435	1.91766	1.96105	0.70058	2.00871	2.81096	3.82436	1.74529	1.09482	2.73049	3.28472	3.94987	1.09041	2.85512	-0.184361	low
CGGA_902	0.528767	1	4.15102	0.325436	1.5433	1.21308	3.60655	2.11816	3.42394	3.77146	1.72326	0.0501642	1.19308	4.1267	4.99656	2.88164	0.570994	1.22184	high
CGGA_P415	0.534247	1	4.62571	1.36096	0.377864	2.91733	1.04773	1.14846	3.97362	3.3748	1.1912	1.58444	2.13777	3.64198	5.27569	0.524981	1.30822	0.554188	high
CGGA_1537	0.547945	0	5.04196	0.183449	0.244633	2.45697	0.319504	2.737	3.53873	4.97383	2.06952	0.27258	2.16035	3.98657	6.3792	3.11742	1.66201	1.17321	high
CGGA_P199	0.556164	1	5.37012	2.4473	0.462939	1.08496	2.78987	1.74844	3.51958	5.01903	1.99154	0.0530871	2.01844	4.68463	5.52097	1.38763	0.91967	0.934775	high
CGGA_1422	0.558904	1	1.44245	0.0954928	-0.055848	0.400656	0.107896	0.604555	0.477636	2.14268	1.81706	0.0248904	1.41929	3.3318	2.60644	0.271729	1.05585	0.386333	high
CGGA_848	0.558904	0	4.65194	0.376377	0.197273	2.00577	3.07367	1.85813	2.53112	4.26269	1.97062	0.104522	1.28611	4.06632	7.35685	3.15058	1.34142	1.10091	high
CGGA_1521	0.561644	1	4.75293	0.478139	0.072495	2.98119	2.12243	2.33851	2.75252	3.95325	3.30827	0.107859	2.09399	4.44996	5.95006	3.77724	2.57325	0.741348	high
CGGA_1596	0.561644	1	4.61731	0.968717	0.167031	2.92686	1.59337	2.96468	3.66531	4.57927	1.85169	0.573461	2.83434	3.68834	7.98692	2.09196	2.18539	0.615601	high
CGGA_1544	0.569863	1	6.00242	2.76822	1.12864	0.170131	4.12948	2.23623	2.89484	4.47249	0.924175	2.26729	2.5911	4.62799	6.65938	1.01411	2.29863	-0.221783	low
CGGA_1460	0.572603	1	5.32015	0.204587	1.30053	2.34264	1.04272	1.34007	2.97314	4.72398	2.16347	0.37208	3.50533	4.16579	2.80977	1.5831	1.18812	0.565464	high
CGGA_P159	0.578082	1	5.24757	0.497649	0.108728	2.61905	1.42733	1.98257	2.81881	4.03578	3.12968	0.441619	2.54962	4.67928	7.07839	1.52807	3.08849	0.383846	high
CGGA_1019	0.580822	1	6.50856	1.89545	1.48772	2.0894	2.91132	1.77659	2.56185	4.6134	1.55659	0.588736	2.21759	5.25988	8.11177	2.18373	0.845386	0.600396	high
CGGA_D63	0.580822	1	6.03831	1.47212	2.22624	1.26899	3.10019	1.51983	2.44915	3.76273	0.555025	1.20597	3.64571	4.63734	6.70007	0.425406	1.57606	-0.449831	low
CGGA_1101	0.586301	1	1.25092	0.0153486	-0.055848	1.38062	0.743736	2.16237	0.844114	2.61499	1.2289	1.16685	2.15037	4.08466	1.78224	0.0501771	1.91898	0.227783	high
CGGA_D30	0.589041	1	5.6937	1.19498	1.38812	2.94473	2.43941	1.01415	3.8125	3.98207	1.88652	0.769025	2.67849	4.7917	8.43272	2.10637	1.30872	0.595534	high
CGGA_1081	0.591781	1	5.92463	1.83045	0.404395	2.53691	2.98046	1.75256	3.05042	4.10357	1.38806	1.2916	2.29116	4.48214	6.21311	2.13712	1.57949	0.417634	high
CGGA_P160	0.6	1	5.12217	0.376209	-0.00303408	1.24623	1.94863	2.5224	3.19467	3.77841	3.33725	0.583114	1.35548	4.5022	6.14347	2.3712	2.23604	0.9705	high
CGGA_1631	0.605479	1	5.21003	0.861487	0.387587	2.88505	1.93071	1.95975	3.35001	4.74266	1.66986	0.398468	1.94403	4.25892	7.22254	2.23698	1.41314	1.02034	high
CGGA_1814	0.605479	1	5.16558	0.386749	0.132353	2.07216	2.08098	1.06179	2.91498	4.32517	2.62298	0.0807363	2.05677	4.7719	7.56125	1.33184	2.1743	0.79296	high
CGGA_D48	0.605479	1	4.31087	2.88107	0.311849	1.33066	2.5463	1.35028	2.37403	4.26042	0.9507	2.13891	1.6425	4.46087	6.58909	1.03421	2.19887	0.147777	high
CGGA_1501	0.608219	1	5.78812	1.11226	1.52716	2.12164	1.45303	1.26884	1.6594	3.68035	0.491917	0.353968	4.26416	4.27705	7.18603	1.93031	0.633932	-0.280704	low
CGGA_318	0.608219	1	5.57812	0.0279821	0.327618	1.23727	-0.15345	0.499069	2.17975	2.71244	1.91837	1.25551	0.925142	5.30265	6.97696	1.45022	0.0283248	1.16914	high
CGGA_1546	0.610959	1	5.68209	0.277531	0.15557	1.96427	1.6297	1.12018	3.48392	3.93898	1.28728	0.160601	1.85558	5.07817	6.83201	1.9191	1.00629	1.10578	high
CGGA_P310	0.613699	1	5.81353	0.961822	1.70229	0.459945	1.58413	0.300683	1.02244	3.05917	0.528196	1.67663	4.53388	3.55036	7.21213	2.352	0.788833	-0.844229	low
CGGA_1685	0.616438	1	5.47706	2.93435	1.78714	1.05404	3.91619	2.42274	3.05593	4.10526	1.56687	1.77992	2.25385	4.61345	4.82612	1.24985	2.83423	-0.297167	low
CGGA_1461	0.619178	1	5.63674	0.0153486	0.00985197	2.01774	0.562405	2.50715	2.88558	4.42908	2.21415	0.0530871	2.20676	4.69737	6.2258	1.37112	1.30822	1.06904	high
CGGA_1060	0.621918	1	3.51259	3.75034	0.997142	0.221362	3.87353	2.1149	2.72371	4.1747	0.44391	2.02811	2.8659	5.01337	5.04294	0.641681	1.72004	-0.175518	low
CGGA_899	0.632877	1	4.4102	1.0026	0.756804	0.911138	2.31483	1.83522	3.66326	3.99767	1.0831	1.53721	2.65044	5.63637	6.09453	0.382502	0.960095	0.808005	high
CGGA_1586	0.635616	1	5.21929	1.60221	0.0846813	1.97386	2.60988	2.35864	3.87426	4.33768	2.5424	0.186258	2.14534	4.45502	4.90268	2.04469	1.8083	0.845221	high
CGGA_842	0.641096	1	1.15129	0.232234	0.230785	2.14137	0.853603	1.95043	3.06994	3.58575	1.55976	0.66353	1.74459	4.93485	6.76947	1.22587	1.53772	1.19637	high
CGGA_1136	0.646575	1	5.32179	1.77333	0.230785	1.04216	3.02775	1.74042	2.68073	2.67986	1.23215	2.38407	1.45231	4.89019	5.7389	0.822597	1.78403	0.19601	high
CGGA_272	0.652055	1	3.79333	-0.0354485	0.145766	1.6468	1.2381	1.12204	3.03073	3.24128	2.24379	0.077595	1.55387	4.48651	6.36638	1.56835	1.14251	1.10537	high
CGGA_1145	0.654795	1	4.11307	0.162211	0.311849	2.31772	2.46984	0.91879	2.70948	4.14607	2.56539	0.0911204	1.94392	4.39312	7.77279	0.798049	1.54125	0.954458	high
CGGA_1301	0.654795	1	5.46407	0.933034	1.43031	1.94932	-0.0464149	0.658224	3.12037	2.84463	1.66315	1.44918	2.48075	3.33052	3.26103	0.756221	2.04033	-0.16714	low
CGGA_P87	0.657534	1	5.31888	2.87889	0.955996	1.78632	2.05154	1.25598	2.46487	4.13975	1.57867	1.18588	2.54594	3.86919	7.2637	1.61915	1.81309	-0.108393	low
CGGA_1729	0.668493	1	5.80582	0.344097	1.85071	2.87358	1.03401	1.05431	2.58542	4.23	0.820014	0.990334	4.12856	4.52879	7.35204	1.23773	1.58003	-0.0970361	low
CGGA_1010	0.673973	1	2.10429	0.545246	0.444493	0.32806	1.81803	0.790051	0.679091	3.25523	1.23632	0.365224	1.88678	4.38833	1.05394	0.0501771	1.46894	0.28933	high
CGGA_1538	0.676712	1	5.41145	0.753252	0.167031	2.30585	2.82057	3.43266	3.57074	4.418	1.5962	0.107859	1.6128	3.74283	7.23154	5.57081	1.43198	1.14782	high
CGGA_1807	0.676712	1	6.79451	1.78479	0.211921	1.73796	3.3055	2.01976	3.02295	4.45837	1.39091	2.78953	1.38778	5.12331	6.31452	1.96706	1.42573	0.749263	high
CGGA_1116	0.679452	1	6.64445	3.17505	1.79057	0.692974	4.08462	1.06294	3.36518	4.63602	0.852822	2.18488	1.85831	4.31613	6.81162	1.23207	2.13001	-0.116893	low
CGGA_1419	0.682192	1	5.4183	0.635767	1.1453	3.30717	0.376051	3.68458	3.37056	4.83061	2.38735	0.92375	2.85759	3.71912	5.29034	2.59028	1.94536	0.649176	high
CGGA_1666	0.682192	1	1.17752	0.0824555	0.00985197	0.410718	0.211512	0.461151	0.59343	1.88638	1.4108	0.284496	1.32712	2.74369	1.87655	0.44195	0.827453	0.335802	high
CGGA_1613	0.684932	0	4.60036	2.25354	0.00985197	1.61103	1.55605	2.64324	4.3672	4.28819	2.03104	0.308032	2.22344	4.37634	7.17292	2.48373	0.901696	1.07439	high
CGGA_1750	0.684932	1	5.33076	0.933894	2.3411	2.72038	1.01318	1.80122	3.47102	3.70884	1.39757	1.13456	3.63622	3.68612	6.66055	1.27376	1.75456	-0.139777	low
CGGA_881	0.690411	1	4.43137	0.158887	-0.0291821	2.05426	1.57484	2.98995	3.12563	3.96737	2.57276	2.44967	1.53807	4.63354	6.9008	1.01411	1.28074	1.22437	high
CGGA_791	0.690411	1	5.32836	0.915163	0.681574	2.58392	2.79794	1.96118	3.04306	3.87476	1.02324	1.9694	2.25132	5.08688	6.93267	0.604605	2.37595	0.305531	high
CGGA_1094	0.690411	1	3.51759	3.59697	0.817106	0.467467	1.92058	2.91199	3.60294	5.14803	0.555025	0.681647	2.0117	4.1997	6.96284	2.43381	2.55853	0.278735	high
CGGA_1365	0.693151	1	1.27913	0.661801	-0.055848	0.88797	0.284434	0.762404	0.477636	1.45438	2.33184	0.223896	1.37863	4.10771	2.97842	0.64103	0.759167	0.418339	high
CGGA_P266	0.693151	1	1.12346	0.121202	-0.055848	0.349199	0.307913	0.518123	0.548357	0.894692	1.072	0.0669788	0.96482	3.01751	1.50417	0.0501771	0.611949	0.268972	high
CGGA_1322	0.693151	1	6.51475	3.40263	0.520609	0.800431	4.75582	1.87699	2.73786	4.26608	0.384713	1.97314	2.0265	4.20657	6.47354	0.425406	1.84819	-0.192267	low
CGGA_1006	0.69589	1	4.73081	-0.00342229	0.145766	0.987266	0.84521	1.33494	4.1506	4.72666	1.88155	0.906577	2.25801	4.56117	13.0851	1.65005	0.364899	1.5446	high
CGGA_1188	0.70137	1	8.20742	1.37367	0.419353	3.2838	3.11027	1.08682	3.14633	4.08011	0.960601	1.67158	1.87411	4.67613	4.85624	0.632498	1.25826	0.460368	high
CGGA_1776	0.709589	1	5.78714	1.19053	1.73829	3.23458	3.89888	2.60097	2.32897	3.87585	1.74003	1.34093	3.29471	4.46446	5.59732	0.910632	2.21094	-0.223348	low
CGGA_P180	0.712329	1	1.042	0.108408	-0.0291821	0.317367	0.107896	1.13439	0.888873	1.96867	1.77648	0.0669788	1.71199	2.8632	2.45735	0.319166	1.43821	0.211673	high
CGGA_P143	0.715068	1	5.62632	0.386749	0.0601974	1.60269	1.84898	2.07017	2.82272	3.82343	2.68554	0.0530871	1.2584	4.84729	4.76484	2.06514	1.59681	1.06175	high
CGGA_D16	0.715068	1	4.00537	0.312445	0.263664	1.08656	0.344575	0.717992	2.47786	2.44956	0.925625	0.760517	2.46247	4.0986	5.16908	0.70444	0.822473	0.365399	high
CGGA_1014	0.720548	1	5.00352	1.45585	1.236	2.39291	1.9162	2.53248	3.38702	4.41858	1.72944	1.09482	3.59488	3.3773	5.7164	1.37112	2.06641	-0.00298112	high
CGGA_679	0.720548	1	3.99573	0.860335	0.145766	1.81344	0.982159	1.41522	3.77391	3.86508	1.87155	0.077595	1.34614	4.62465	5.60071	1.60735	1.80769	1.07941	high
CGGA_D26	0.720548	1	6.93601	1.01954	6.06846	1.04216	1.02028	2.0819	2.99334	3.71547	1.63655	0.645186	2.74446	5.66201	9.48636	2.37436	1.01675	-0.117986	low
CGGA_1492	0.734247	1	4.74221	1.16095	0.211921	2.28319	2.58985	2.8287	3.26019	3.86964	3.08783	0.365224	1.89293	4.63906	5.28656	0.97802	2.95308	0.529805	high
CGGA_P100	0.734247	1	5.51436	1.14894	0.618487	2.2288	3.31483	2.38689	3.76749	5.48773	1.46889	0.376391	2.64666	4.23461	7.67485	0.955913	1.38117	0.902233	high
CGGA_1494	0.736986	1	1.27913	0.14644	-0.0160446	0.0317837	0.0669513	0.685785	0.465461	1.56228	0.728983	0.0248904	1.48006	2.45378	1.19687	0.376305	0.644798	0.141138	high
CGGA_1073	0.739726	1	5.29037	0.325436	0.263664	1.06895	0.011646	1.08088	2.36404	4.77003	2.60814	0.077595	2.41301	5.02081	8.0017	2.70247	2.40931	0.675363	high
CGGA_1224	0.742466	1	4.05575	0.13333	0.247302	1.19676	1.01273	0.396016	3.20424	3.55356	1.23215	0.207547	2.36248	4.40689	7.53466	0.893922	0.449379	0.973329	high
CGGA_1251	0.745205	1	6.05194	1.43996	0.263664	1.22925	4.5889	1.10452	3.50728	4.30636	0.63273	2.06715	2.25801	4.25308	8.08114	1.67326	2.11821	0.263031	high
CGGA_P295	0.747945	1	5.54822	0.831422	1.22043	3.40427	1.24459	2.32687	3.80892	2.93445	1.71343	0.755094	2.9626	3.87016	7.61097	1.36001	1.73955	0.173512	high
CGGA_1393	0.753425	1	6.12203	0.245881	0.311849	3.27205	1.27059	2.45761	2.99585	4.65188	1.83082	0.326922	2.63913	4.58191	4.16966	1.1754	1.49107	0.829204	high
CGGA_483	0.758904	1	2.09479	0.0587882	0.655758	1.38281	0.261606	3.16974	3.5429	3.796	2.38623	0.008032	2.37522	5.27136	5.28876	2.25105	1.44664	1.26431	high
CGGA_1382	0.778082	1	4.84968	0.254607	0.132353	2.68491	1.3362	2.49172	3.23778	4.38718	4.08025	0.544101	1.88678	4.57814	6.47034	2.83781	2.23959	1.14119	high
CGGA_1346	0.778082	1	4.25412	1.1412	0.295935	1.47554	3.53442	1.08682	2.6633	4.80989	1.55659	0.195058	2.47468	4.5493	4.39889	0.245908	0.775535	0.873064	high
CGGA_662	0.778082	1	5.90114	2.51485	1.26423	0.692974	3.40972	1.01415	1.39174	2.56003	1.61851	2.81398	2.23114	3.50128	5.34574	0.497657	3.44091	-1.23096	low
CGGA_568	0.780822	1	5.53727	0.478139	1.34497	2.06622	0.743736	1.04679	2.73592	3.10782	1.00427	0.483501	3.1255	3.61643	5.21618	0.86385	1.69353	-0.149853	low
CGGA_1218	0.783562	1	4.39135	1.36689	0.419353	2.81337	0.657828	2.59408	3.39265	4.3141	2.24189	0.967102	1.28611	3.95767	5.98761	1.28667	2.48859	0.775014	high
CGGA_1418	0.786301	1	1.50811	0.183449	0.00985197	0.380306	0.387089	0.461151	0.513483	2.0061	1.31563	0.0248904	1.84607	3.21246	2.30283	0.0918882	1.15768	0.121396	high
CGGA_120	0.789041	1	5.23912	0.554571	0.0601974	3.16989	0.533035	3.32824	3.55207	4.64098	1.75576	0.296312	2.08347	4.09541	6.18452	2.97391	1.8739	1.03114	high
CGGA_782	0.791781	1	3.76026	1.78911	0.343247	2.7371	2.68371	2.15367	2.87193	4.05637	2.77702	0.219931	2.40676	4.46456	6.9321	0.713195	1.75086	0.609356	high
CGGA_1663	0.794521	1	5.22144	0.954893	0.794211	2.26272	0.513104	0.895302	3.50818	2.93445	1.00427	1.40717	2.01844	3.94396	6.20117	0.584198	1.57439	0.30329	high
CGGA_1380	0.79726	1	4.9241	0.468279	1.08318	2.63287	1.67816	2.44702	2.59943	4.02712	1.92791	1.44443	2.79108	3.46921	6.14197	1.34881	2.02993	0.208318	high
CGGA_1641	0.79726	1	5.88193	1.65749	1.02411	2.13303	4.14415	1.6067	2.97877	3.97643	1.16034	1.79643	2.51052	4.78087	7.12157	1.24985	0.769125	0.452535	high
CGGA_1747	0.80274	1	6.2137	2.70742	0.276569	0.544309	1.93791	0.817143	3.0705	3.59867	0.44212	1.51615	2.929	4.67122	7.54796	1.23773	1.51088	-0.164103	low
CGGA_P388	0.80274	1	5.09056	1.41172	0.453748	1.43371	1.40642	1.90895	3.59129	4.23338	2.50199	1.24148	2.04594	3.6961	5.25894	2.74478	2.12906	0.575715	high
CGGA_P89	0.805479	1	4.7556	0.333224	0.0967584	1.69173	3.18691	2.19498	3.7372	3.72186	2.94303	0.186258	1.42815	4.87121	6.30497	1.41471	1.68833	1.20111	high
CGGA_495	0.808219	1	3.25132	0.576587	1.30053	0.758277	3.10423	2.46028	3.19737	3.28824	1.76189	1.88067	2.07756	6.48599	6.38313	1.65473	0.810879	1.05457	high
CGGA_1237	0.810959	1	5.2323	1.7574	0.477932	2.28818	4.138	1.16224	3.52911	4.22034	1.34055	0.156939	1.61626	4.34876	7.76812	3.3105	0.714649	1.01398	high
CGGA_1412	0.810959	1	5.17462	2.39706	1.71434	1.43338	3.31547	1.92508	2.08721	2.4524	2.37765	2.04598	2.73903	3.93669	4.02836	0.70444	2.4589	-0.767191	low
CGGA_1520	0.813699	1	5.87335	0.311217	2.14596	2.83177	0.272544	1.11302	2.76279	3.7917	0.986839	1.12801	3.65254	3.66592	6.79513	1.82602	2.18539	-0.319936	low
CGGA_D19	0.813699	1	5.0926	2.16134	2.43537	0.170131	4.71502	2.70867	2.36292	3.81974	3.11932	2.72047	1.92324	4.18156	4.36091	0.564734	2.86888	-0.325472	low
CGGA_1770	0.816438	1	5.01803	2.46826	0.318006	0.632303	3.05722	1.85201	3.23919	4.59727	1.4042	0.553955	1.54211	4.91826	7.13516	2.16002	1.50496	0.76838	high
CGGA_1908	0.816438	1	4.96349	2.12028	0.072495	3.70538	3.90756	1.5032	3.06889	4.13394	1.95551	1.34657	2.02951	5.32588	6.86684	1.5031	1.58003	0.726154	high
CGGA_1476	0.819178	1	4.94758	0.20758	0.757913	4.10298	2.9422	2.0416	3.09125	3.95659	2.09877	0.198915	3.1255	3.72346	7.30889	0.790635	1.73451	0.449008	high
CGGA_D46	0.821918	1	2.56518	1.91009	0.295935	0.428894	2.61375	1.42986	2.24758	3.81741	1.03729	0.699544	2.45021	4.06072	4.80176	0.96939	2.0919	0.104483	high
CGGA_P205	0.827397	1	1.042	0.0153486	0.0846813	0.205547	0.173558	0.389451	0.906348	1.75461	1.20639	0.0248904	0.773409	2.40312	0.788619	0.0918882	0.708313	0.478266	high
CGGA_1811	0.832877	1	5.10747	1.39668	0.462939	2.94104	0.842135	1.49781	3.16511	3.44803	1.28011	1.66767	1.54211	3.70492	7.02535	0.722203	1.96698	0.378441	high
CGGA_1002	0.835616	1	5.5675	1.2252	2.57406	2.30084	0.992033	2.0416	2.97184	4.20543	1.08025	1.47561	3.72169	3.90945	6.67124	1.1945	1.95837	-0.312164	low
CGGA_P116	0.835616	1	1.34701	0.0824555	-0.0291821	0.205547	0.107896	0.518123	0.647634	1.3969	1.4815	0.186258	1.17504	3.5687	1.65585	0.171785	0.708313	0.403414	high
CGGA_1447	0.843836	0	1.19999	0.183449	0.444493	0.295724	0.0669513	0.437671	0.59343	1.37916	0.915003	0.198915	2.37714	2.04409	1.55324	0.184672	1.08	-0.336771	low
CGGA_P136	0.843836	0	1.17752	0.108408	0.0352599	0.915939	0.173558	0.685785	0.825764	2.3284	0.978048	0.0943621	2.05407	2.45378	1.61071	0.3423	1.10375	0.149898	high
CGGA_P145	0.843836	1	5.49176	1.46067	2.27835	2.41152	0.873441	1.74844	2.89853	3.16392	1.072	2.49811	2.64496	2.98615	5.92352	0.773835	2.85742	-0.684527	low
CGGA_P421	0.843836	1	5.68337	0.448345	-0.0291821	0.306589	3.92819	0.87832	2.70206	3.93305	0.504109	0.462714	1.58577	5.93527	4.77913	0.271729	1.10375	0.896528	high
CGGA_1767	0.846575	0	1.38606	0.0153486	-0.055848	0.459945	0.248453	0.886838	0.513483	1.68575	1.63065	0.0248904	0.906369	2.95597	2.07472	0.353726	0.71863	0.48663	high
CGGA_P439	0.846575	0	5.54204	0.277532	0.211921	1.71889	2.87636	0.540256	2.36292	4.08804	0.697352	1.43389	2.09922	5.07697	3.73476	1.76875	2.55061	0.308925	high
CGGA_1295	0.849315	1	5.23184	1.81857	0.120592	1.45718	3.35798	2.0416	3.33961	4.51614	1.61926	1.22931	2.21632	4.2691	6.2013	1.17556	1.86931	0.522936	high
CGGA_P438	0.849315	0	6.44256	0.6445	1.22564	2.70556	3.73049	1.22989	1.73442	3.14857	1.602	1.98451	2.09399	5.13139	3.2552	0.622339	2.45325	-0.154717	low
CGGA_1457	0.854795	1	4.41752	2.02156	1.1672	2.69996	3.68955	1.86442	3.78515	3.52783	1.85657	2.16969	1.99317	4.83636	6.32989	1.91157	1.61887	0.535555	high
CGGA_1216	0.854795	1	5.46096	0.190585	0.263664	3.47809	0.935166	2.37529	3.05532	4.54199	1.85134	0.734695	2.62776	3.58989	4.16966	1.98042	1.41625	0.803573	high
CGGA_D44	0.857534	1	4.10779	0.0279821	0.863888	1.51665	-0.0762645	1.86569	2.56795	2.88604	1.77543	2.22317	2.27796	4.43484	7.10795	1.35652	2.46264	0.178364	high
CGGA_1078	0.863014	1	2.30896	-0.0354485	0.145766	3.33681	0.367503	1.70763	3.10129	3.22601	2.91556	0.268448	1.94392	3.2986	6.42184	0.435942	2.71759	0.637484	high
CGGA_1008	0.863014	1	4.63372	0.13333	0.21411	1.84707	1.13644	1.51983	2.22993	4.08011	3.09073	-0.0353457	2.29116	4.23716	5.91454	3.90166	1.43153	0.90431	high
CGGA_P98	0.868493	1	5.83919	1.09354	3.09499	2.66203	2.40296	1.14144	2.39872	3.90736	0.780245	1.7249	3.44409	3.81863	5.99093	1.11052	1.95404	-0.547458	low
CGGA_1181	0.871233	0	6.7778	2.92609	0.297447	0.535189	2.45086	1.40852	3.07211	4.09405	0.609544	2.23751	2.7926	4.25234	6.61573	1.08364	2.05839	-0.307718	low
CGGA_245	0.871233	1	3.77835	1.96734	0.247302	0.861727	2.02773	1.86569	2.83714	4.15327	1.40589	1.73442	1.94392	3.74197	3.7811	0.764681	2.24303	0.265897	high
CGGA_763	0.873973	0	5.32935	0.438269	2.71365	2.25497	0.284434	1.34351	2.72333	3.40052	1.66432	1.41255	3.05962	3.19658	4.2028	0.484076	2.53051	-0.469636	low
CGGA_1605	0.879452	1	6.40683	0.898167	2.82751	2.62301	1.01318	1.22329	3.17554	3.65648	1.05535	0.983088	3.77892	3.4679	6.17072	1.16279	1.86931	-0.491325	low
CGGA_1326	0.882192	1	5.3271	0.516886	0.99974	2.45249	1.95219	1.47603	3.33044	3.65124	1.2729	0.553955	2.55328	4.95502	6.3987	4.14056	1.48105	0.641123	high
CGGA_P270	0.882192	1	5.5284	2.55991	-0.055848	0.615152	3.17961	2.50202	2.31455	3.94739	1.44335	2.83971	2.01844	4.64017	6.32883	0.210098	3.03667	-0.237569	low
CGGA_1435	0.887671	0	5.6018	2.26966	0.697721	1.46646	3.67324	2.48654	2.75458	3.5777	1.12083	2.48552	2.62956	4.44487	5.54979	0.3423	2.00508	-0.178835	low
CGGA_1329	0.893151	1	5.53538	2.39706	0.145766	0.36255	3.31194	1.49193	3.12511	2.55465	1.19951	2.32944	2.05581	5.19508	4.28515	4.37811	2.06757	0.0041608	high
CGGA_2024	0.89863	1	6.22304	0.158887	3.16205	3.23079	0.387089	0.771683	2.61099	3.78602	1.17585	1.20466	3.22214	3.10402	4.81789	1.02122	2.50423	-0.536713	low
CGGA_507	0.89863	1	5.42014	2.59409	2.68581	2.72222	1.54656	2.19498	2.86118	4.08276	1.57867	1.27146	3.50708	3.75558	5.49765	0.739624	2.19274	-0.568333	low
CGGA_1785	0.90137	1	6.17522	1.56706	0.266008	0.273733	3.64318	1.6747	3.35389	4.52157	1.4239	0.452206	1.04479	5.41217	6.67535	1.60983	0.855748	1.17681	high
CGGA_1411	0.90137	1	4.48538	0.162211	1.92116	2.37932	0.161129	1.10452	2.67203	2.65442	1.37362	1.07427	3.36428	3.19908	3.26315	0.878362	1.78701	-0.308989	low
CGGA_1496	0.90411	1	5.493	2.79764	0.962332	0.370016	3.82369	2.29134	2.36013	3.52204	2.18711	1.39634	1.98748	5.06735	4.80245	0.963321	2.9934	-0.312426	low
CGGA_643	0.906849	1	5.58629	3.53238	0.875391	0.800431	5.68939	2.46296	3.40731	4.61719	1.00428	1.26159	3.54796	5.65728	8.34029	6.11267	0.73931	0.3586	high
CGGA_1635	0.909589	1	1.49642	0.14644	0.0601974	0.390519	0.752208	0.540256	0.402793	1.12349	0.770133	0.198915	1.6725	1.61213	0.686008	0.0918882	0.865057	-0.221725	low
CGGA_1713	0.909589	1	6.54784	2.04377	0.472069	2.66778	4.57582	2.03436	3.2092	4.48757	1.44978	2.26139	1.59742	5.54519	6.90814	1.14341	1.23135	0.801814	high
CGGA_1474	0.912329	0	1.23658	0.231295	0.42579	1.06028	0.785588	0.762404	0.402793	1.39101	0.915003	0.441619	1.90209	2.85295	1.3187	0.078121	1.43821	-0.231645	low
CGGA_1070	0.912329	1	3.61071	-0.0354485	0.562265	2.00071	2.80039	2.34981	3.28727	6.02203	2.55033	0.130965	2.52286	5.50204	8.50132	1.79274	1.0517	1.69425	high
CGGA_1886	0.926027	1	5.53224	0.171223	0.120592	2.29582	0.398039	2.50459	3.31457	4.52643	0.915003	0.160601	1.90209	4.75276	7.08361	4.32539	1.48105	1.15546	high
CGGA_1589	0.936986	1	5.6223	0.243	1.86696	2.16663	0.581644	1.55594	2.87812	3.75239	1.77648	0.938818	3.21345	3.49638	4.91585	1.02829	3.10018	-0.373268	low
CGGA_1359	0.939726	1	4.19329	1.60655	0.0226159	2.50312	3.60602	1.92084	3.34092	3.59428	1.17585	1.76741	1.89905	4.40613	7.79097	0.650283	1.28074	0.680212	high
CGGA_1809	0.939726	1	4.51896	1.17877	3.75693	1.26779	4.53625	1.80122	3.36673	3.54732	0.969204	2.41022	2.24922	4.59762	6.95863	0.473662	1.16522	0.116306	high
CGGA_P146	0.942466	0	5.05954	1.80366	0.794211	1.07883	3.11517	2.15243	2.85358	4.50523	1.4108	1.66767	2.29255	4.2294	5.64514	0.807236	3.60924	-0.201337	low
CGGA_1568	0.945205	0	5.50262	2.42362	1.81763	1.70344	2.4309	0.826054	2.57835	4.25809	0.551898	1.47561	3.96053	4.63298	7.23126	0.887435	1.91008	-0.550777	low
CGGA_1682	0.945205	1	3.88906	0.687351	0.222914	1.81526	1.57016	2.49172	2.97184	4.02712	3.16232	0.462714	1.59742	4.27849	4.6279	1.4254	2.48346	0.821469	high
CGGA_1007	0.945205	1	3.35267	0.272837	0.358736	2.49231	1.46405	2.90374	2.26858	3.84419	2.31959	0.292118	2.73903	3.47244	8.09366	2.52533	2.58627	0.325115	high
CGGA_789	0.945205	1	5.22035	0.714536	1.40512	2.98164	0.599944	1.4778	3.41979	3.6899	1.86653	0.760517	3.22298	4.39465	4.61213	0.909322	1.58292	0.296563	high
CGGA_1681	0.947945	1	3.7021	0.376209	0.0226159	1.38062	0.398039	0.705352	2.01189	3.16696	1.35033	0.160601	1.6725	3.22972	7.75595	2.05836	0.697921	0.723176	high
CGGA_1170	0.947945	1	6.95518	3.22966	0.681574	0.161355	3.6713	2.57416	2.20856	4.29748	0.669964	1.03233	1.09618	5.18933	4.35624	0.446406	0.769559	0.426222	high
CGGA_1551	0.950685	1	5.76138	0.6445	0.50798	1.89855	0.236248	0.495622	1.71607	2.80666	1.00427	0.648916	3.02851	4.87538	6.73097	2.7961	0.687454	0.171223	high
CGGA_1045	0.953425	1	4.19735	-0.0354485	0.197273	2.42309	0.836773	1.84289	4.5199	4.19707	1.90376	0.0639437	2.16258	4.18326	8.54582	2.19679	0.536268	1.5606	high
CGGA_1722	0.956164	1	1.08339	0.0425855	-0.0291821	-0.00851789	0.12128	0.685785	0.615387	1.45438	1.35033	0.0530871	0.697437	3.12776	1.53167	0.319166	0.827453	0.466894	high
CGGA_P150	0.956164	0	4.99032	2.75327	0.64275	0.158118	4.08145	2.69093	2.65622	3.94319	1.64758	2.5205	2.10443	4.24498	6.02632	0.33078	3.48281	-0.445131	low
CGGA_1686	0.964384	0	4.97063	2.53371	0.593778	3.66082	2.87818	1.54556	2.67825	4.52103	0.563608	2.27611	3.4459	5.8926	7.63707	0.668609	1.73955	0.104688	high
CGGA_448	0.969863	1	3.01758	0.461838	0.327618	1.33821	1.48665	1.425	2.2511	2.84928	1.96829	0.415889	2.29774	4.21683	3.23125	1.08277	1.25397	0.520222	high
CGGA_1603	0.975342	1	4.41926	1.46067	0.634711	0.251381	0.198976	2.74345	4.66247	4.1825	1.28728	1.24753	2.65513	5.12485	6.87058	2.18199	0.60083	1.10638	high
CGGA_P437	0.975342	0	6.85121	0.839	0.836516	0.553368	5.17022	0.826054	2.00822	3.8262	0.986839	2.63428	2.44657	5.15723	3.83447	0.247399	2.36185	-0.21814	low
CGGA_D32	0.980822	1	3.96937	0.531659	0.263664	1.89089	2.0787	2.3781	3.08688	3.57775	3.01674	0.008032	1.01792	4.09036	5.12693	4.47169	0.954833	1.40142	high
CGGA_1369	0.986301	0	6.71366	1.76951	2.40323	0.909	4.1565	0.604555	2.7191	3.40052	0.800263	1.84484	3.51828	5.06655	7.96138	0.504677	1.71417	-0.599752	low
CGGA_1697	0.986301	0	5.34671	0.487928	1.58013	2.75494	0.656035	1.99384	3.04776	4.91022	1.23632	0.621087	3.77191	3.83669	6.56234	2.31847	1.65135	0.271308	high
CGGA_578	0.991781	1	5.78516	0.388866	0.756804	5.0166	3.72944	1.40045	2.29628	2.76154	1.99143	2.80977	2.54067	5.54386	2.54412	0.806276	2.37992	0.0694829	high
CGGA_1740	0.994521	1	4.9665	1.04886	1.79738	3.22952	4.27498	1.75738	2.80305	4.14481	0.820014	1.47561	3.60614	5.38793	7.13812	1.94144	1.34184	0.200058	high
CGGA_1420	0.99726	1	6.27166	0.582172	3.64875	2.73686	0.850028	1.03923	2.61788	3.69772	1.17585	0.780445	4.90741	3.96135	4.60945	0.704564	1.2668	-0.684391	low
CGGA_108	1.00274	1	6.08265	2.02156	0.307766	2.47474	0.941394	2.35292	2.82077	2.73035	2.53626	2.26729	1.55816	5.65619	5.89473	1.21937	1.59124	0.464651	high
CGGA_1634	1.00274	1	5.44146	1.94595	0.0477864	2.40224	3.18108	2.01609	2.48534	3.80205	1.53088	0.953728	2.04048	4.35134	5.8267	1.77292	0.846379	0.583533	high
CGGA_867	1.00548	1	5.91815	1.58913	0.00985197	1.1908	2.41319	2.87427	3.28358	4.63404	1.4108	2.64336	1.95576	4.49976	5.92433	1.37664	1.84148	0.618207	high
CGGA_1053	1.0137	1	4.24412	2.28932	0.145766	3.38598	2.32477	1.10452	3.87085	3.42103	1.59716	1.14159	1.53573	5.25157	7.51007	0.686775	1.57261	0.796557	high
CGGA_658	1.01918	1	4.20881	0.449903	0.263664	1.38281	3.38625	2.05504	2.82632	4.47807	2.15942	0.49977	2.0265	4.82953	5.38376	1.66865	1.40081	1.04091	high
CGGA_676	1.03014	1	2.48425	0.147835	0.145766	2.17361	0.390103	2.69505	2.10603	3.87613	2.9886	0.415889	1.85036	4.07838	6.51303	2.16725	1.25826	1.1406	high
CGGA_P5	1.03562	1	4.90491	0.975576	0.244633	0.943345	1.59796	2.23623	2.81293	3.94655	2.53317	1.97005	1.72605	4.44932	5.90451	0.963321	2.26768	0.550794	high
CGGA_1313	1.03836	1	4.76986	0.754719	0.197273	1.05114	1.92484	2.05165	2.42005	4.23417	2.08662	0.156939	1.79401	4.59559	6.97865	0.886162	1.04676	0.947621	high
CGGA_1985	1.0411	1	6.24288	3.1176	0.0352599	0.738812	2.54428	2.57448	4.02363	4.52103	0.896486	2.62743	2.48956	5.2024	6.68432	1.0493	1.75456	0.339074	high
CGGA_604	1.04384	1	4.42658	-0.0354485	0.295935	0.987266	0.903044	1.65725	2.70948	3.89123	2.0629	1.43847	1.13974	4.62465	6.36497	1.65473	0.258291	1.44792	high
CGGA_1154	1.04932	1	5.44917	2.3323	0.222914	0.193844	2.81487	2.69761	3.11168	4.16415	1.89504	2.83378	1.77743	4.59078	5.48132	0.76536	3.00797	0.0739671	high
CGGA_678	1.05753	1	4.82634	0.0587882	0.343247	2.11795	1.13644	2.29769	2.25461	4.56155	2.96766	0.49977	1.85036	3.62649	8.51308	4.01428	2.75018	0.675871	high
CGGA_1659	1.06027	1	4.87417	1.53098	0.318006	2.57672	3.40107	2.54497	3.16062	4.33144	3.036	0.134474	2.09661	4.62297	3.83534	1.73067	1.89662	0.788081	high
CGGA_P18	1.06027	1	4.85256	1.29746	0.551562	0.606496	0.785588	1.80122	2.76483	3.4056	1.71879	2.93321	1.92324	4.2159	5.81611	0.494414	4.10219	-0.392653	low
CGGA_859	1.06027	1	6.34528	0.473686	0.247302	1.73814	1.10105	1.15085	3.90614	4.28296	2.60669	0.0911204	1.8898	4.52104	4.11086	1.61216	1.03183	1.17607	high
CGGA_1698	1.06301	1	5.58994	0.14644	0.0226159	1.8918	0.198976	2.19498	3.30923	4.39316	1.72413	0.563741	1.94991	4.43593	6.46624	4.07206	0.946212	1.26618	high
CGGA_P23	1.07397	1	1.26511	0.14644	-0.055848	0.730908	0.0669513	0.724638	0.709796	1.90645	1.29442	0.0248904	1.58186	2.98615	1.39379	0.38746	0.989384	0.284676	high
CGGA_1118	1.09041	1	5.79133	2.34223	0.769032	1.83034	2.96511	1.6615	3.98475	3.67164	1.12303	1.35554	2.69516	4.25808	5.65175	1.7452	1.58975	0.166372	high
CGGA_1817	1.09315	1	4.97548	0.407589	0.00985197	3.1539	0.743736	2.06308	3.14856	4.01921	1.61926	0.630424	2.05407	3.90378	7.91799	2.53801	2.00925	0.747037	high
CGGA_1749	1.09863	1	4.95328	0.121202	0.658687	1.87477	2.29358	3.02001	2.76483	4.40859	2.44086	0.21146	2.6999	4.37567	6.56799	3.45175	1.74957	0.771822	high
CGGA_P30	1.10685	1	5.23123	0.618133	0.178394	3.45894	3.24538	3.77951	3.54875	4.5942	2.41435	0.0248904	1.94697	4.93033	6.48486	0.86385	0.865057	1.42239	high
CGGA_P109	1.11233	1	4.46535	2.42839	-0.055848	0.597784	2.55352	1.92084	3.66733	4.2856	1.60778	1.84484	2.32356	4.4701	6.48817	1.07001	1.43821	0.586303	high
CGGA_P22	1.11233	1	5.05113	0.448345	0.120592	3.14852	2.06797	2.4943	3.68541	4.78273	1.83695	0.198915	2.29926	3.67381	7.18662	1.38763	1.76942	0.953127	high
CGGA_1183	1.11781	1	4.41984	0.322265	0.00985197	0.32806	0.12128	2.20461	3.35131	4.82676	1.88073	0.8539	2.53672	3.97401	5.44324	2.02394	2.95093	0.543684	high
CGGA_P416	1.11781	0	6.24874	0.507301	1.25648	1.13891	4.37735	0.753061	1.53262	3.30957	1.43042	2.21015	2.53857	4.10853	4.11969	0.544998	3.52091	-0.767449	low
CGGA_1138	1.12603	1	4.83058	1.61086	0.211921	3.72757	0.503029	3.29299	4.25256	5.05949	2.58771	2.18539	1.35548	3.65457	5.32859	2.53073	1.56873	1.33519	high
CGGA_1518	1.12603	1	4.81289	2.37254	0.836516	2.3645	4.51743	3.10309	2.42293	4.01523	1.56093	1.58444	2.24689	3.75028	6.83554	0.902942	1.69353	0.109011	high
CGGA_P411	1.12603	0	5.66945	0.354885	2.22744	0.158118	5.03471	0.928638	2.68261	5.28696	1.25838	1.10152	1.88369	5.07177	5.91993	1.04234	2.1964	0.484636	high
CGGA_1571	1.12877	0	6.71178	2.8049	2.93395	2.02696	3.62419	1.40852	2.96836	3.86964	0.504109	1.4549	4.12696	4.72819	6.9703	1.13035	1.04771	-0.632389	low
CGGA_1171	1.12877	1	2.65996	0.401259	0.145766	3.05308	1.28976	2.34695	3.90947	2.38018	2.66357	0.156939	1.68558	4.01046	6.38661	0.924566	1.76905	0.916737	high
CGGA_P27	1.13151	0	5.86471	2.94909	1.50622	0.64924	4.41927	2.03072	2.49041	4.02317	1.11281	1.91827	2.53115	4.08549	6.3313	1.02122	3.62007	-0.853552	low
CGGA_1758	1.13425	1	5.03984	1.08725	-0.0291821	2.06622	4.45179	3.74213	3.18145	4.63503	2.27048	0.160601	2.26076	4.97369	6.02212	1.8772	1.98404	0.886983	high
CGGA_1709	1.13699	1	4.20226	0.254607	0.0846813	2.60308	2.59209	2.24247	4.95652	4.30234	2.06952	1.48075	1.95868	5.33152	7.05109	1.8964	1.6352	1.48036	high
CGGA_599	1.14521	1	5.16065	0.832208	0.180273	2.54423	0.412385	1.99304	2.4168	3.61585	2.00285	1.60113	3.06312	3.51422	6.45325	1.31617	2.73785	-0.147365	low
CGGA_458	1.14795	1	6.23839	1.54068	1.73547	0.768916	4.05945	2.38928	2.5588	4.31189	1.00904	1.57687	3.6677	4.10043	4.33467	0.576185	2.99147	-0.720007	low
CGGA_1106	1.15068	1	5.30861	0.133879	0.338256	2.01465	2.10345	2.65475	3.20196	3.84266	2.47655	0.147598	2.02398	4.87724	5.36112	1.88875	1.44441	1.01511	high
CGGA_1120	1.15616	1	1.71674	0.407589	0.255363	0.205547	0.888832	0.594049	0.402793	1.7275	0.986839	0.365224	1.92024	3.57476	1.90916	0.295647	0.855748	0.0288544	high
CGGA_1178	1.15616	1	6.23973	3.14189	1.17262	1.74551	3.18254	2.8287	3.02295	4.47474	0.820014	2.19782	2.69337	4.2144	6.40336	0.8559	2.60105	-0.378491	low
CGGA_1119	1.15616	1	6.35023	1.31861	2.00708	0.307503	0.878516	1.58769	3.14633	3.10554	1.39164	2.5544	2.14162	5.60847	4.9226	1.7364	1.31285	0.213144	high
CGGA_1391	1.16712	1	5.74466	0.704125	0.51681	3.9785	1.76213	2.06663	4.03355	4.51886	1.90922	0.946293	2.48185	4.40482	7.30243	2.43511	1.60236	0.938736	high
CGGA_1160	1.16712	1	5.12184	2.6979	0.805211	1.18854	2.10549	0.982947	3.82982	3.88575	1.04194	1.57687	2.12753	4.49521	6.71928	0.349501	2.18082	0.100708	high
CGGA_P399	1.1726	0	7.04337	3.54851	1.66529	0.623755	4.32967	2.57933	3.01961	4.07517	1.25838	2.62743	3.00948	4.16914	6.11645	0.271729	3.11947	-0.943448	low
CGGA_P422	1.17808	0	6.63081	0.582172	3.57723	0.507457	4.71936	0.808172	1.97088	3.14239	1.02149	1.94069	1.90209	3.91793	2.99542	0.44195	3.14227	-0.868276	low
CGGA_1141	1.18356	1	5.40722	0.635767	2.98559	3.08516	0.552684	1.78822	2.57125	3.99759	1.03003	0.997544	4.16319	3.56017	6.29208	0.89521	1.32177	-0.327659	low
CGGA_837	1.18356	1	5.30943	0.312445	0.145766	1.7675	2.23997	1.50594	2.04139	4.35342	1.42349	-0.0353457	1.12893	4.66439	7.05091	0.991311	1.9151	0.836389	high
CGGA_1660	1.1863	0	5.46319	1.26458	1.53131	2.12164	0.0669513	0.771683	0.880045	3.28755	0.978048	0.0248904	5.28799	4.26257	6.70895	3.33426	0.655582	-0.691143	low
CGGA_P11	1.1863	0	6.10266	3.02054	2.3569	0.306589	3.79676	1.92084	3.40079	4.48979	0.942351	1.75056	2.62956	5.00479	6.24255	1.32614	1.94536	-0.172526	low
CGGA_488	1.19178	1	2.22764	0.906153	0.295935	0.428894	3.88466	4.07168	1.09351	4.61056	1.28357	0.130965	1.44286	5.3592	3.85913	1.96912	1.93941	0.869775	high
CGGA_P392	1.19726	0	5.98945	0.846536	1.33062	1.03515	3.85552	1.13439	2.18019	2.96321	1.4042	2.37786	2.44855	4.21213	3.88689	0.622339	3.59558	-0.750082	low
CGGA_1451	1.2	1	5.06823	0.6445	0.50798	2.24456	2.3265	1.71668	3.29174	3.72881	1.35717	0.134474	1.65414	4.80842	8.49103	2.53559	0.865057	1.07573	high
CGGA_1175	1.20822	1	6.07225	3.08835	0.389308	0.64797	3.17332	2.3809	2.41027	4.87901	0.493655	1.92377	2.23788	4.32414	7.96429	1.78421	1.48376	0.129605	high
CGGA_773	1.2137	1	4.76884	0.485448	2.13963	2.87437	0.378843	1.36043	1.35526	3.50926	1.63953	1.03941	3.51704	2.8598	3.43935	0.730554	2.64354	-0.738864	low
CGGA_P16	1.22466	0	6.12851	2.79764	0.650742	0.0964137	4.49947	2.91268	1.85601	3.61174	1.4239	2.64336	2.15537	4.97239	5.32203	0.524981	3.0826	-0.582446	low
CGGA_1280	1.22466	1	3.43646	0.461838	0.389308	3.7398	0.0398964	3.45214	2.99836	4.55179	3.10385	0.219931	1.21408	4.10408	6.49637	0.830691	1.73244	1.38374	high
CGGA_892	1.2274	0	7.1386	3.12083	1.45515	1.12125	3.7842	2.16323	1.82687	2.84928	0.770188	2.79704	2.22437	4.17978	4.05081	1.23207	3.00699	-1.10797	low
CGGA_P385	1.23014	0	5.97922	0.243	2.22496	2.82326	0.646952	1.95591	2.76483	4.04437	1.09662	1.11483	3.50708	3.31287	5.09613	0.89521	2.30203	-0.308912	low
CGGA_1177	1.23014	1	3.61871	0.259415	0.21411	0.920846	0.13498	0.588414	2.55268	2.45523	1.26008	0.219931	1.41426	5.04817	4.75616	1.04825	-0.0327312	1.10778	high
CGGA_1083	1.23288	1	3.52092	-0.00342229	0.145766	1.46858	1.32743	2.43604	3.99118	3.58894	2.77446	0.0222109	1.90539	4.95593	6.55263	1.65473	1.92054	1.19767	high
CGGA_P315	1.23562	1	6.29927	2.81212	2.24218	1.97067	3.17227	1.73492	3.02295	3.99192	0.454727	1.65866	3.86807	4.62687	6.95585	0.948466	1.70389	-0.611013	low
CGGA_1560	1.25753	1	5.80987	1.13072	0.0477864	1.35578	3.49164	2.17551	3.57835	4.59523	1.5248	2.4182	1.76053	5.3292	7.06984	1.47253	1.43821	1.00495	high
CGGA_1760	1.25753	1	5.27199	0.478139	1.05397	3.14852	1.56077	1.14846	3.19759	3.91426	0.896486	0.772045	2.82403	3.84761	6.50473	2.40085	1.73451	0.325666	high
CGGA_1114	1.26027	1	4.94429	1.4529	0.21411	1.72026	0.13498	1.31947	2.96806	3.64549	2.1513	0.077595	2.65608	4.48068	6.17514	2.29735	0.70216	0.708513	high
CGGA_1510	1.27397	1	6.29035	2.97971	0.0352599	0.535189	3.04113	3.28007	3.38702	4.15344	1.63632	2.89578	2.79713	5.42644	5.36925	2.70664	2.1443	0.114625	high
CGGA_1452	1.28219	1	4.49681	1.66165	0.0967584	2.55817	2.21653	1.58662	3.51503	4.05909	0.829792	1.00472	1.96739	5.15573	8.44997	1.25586	1.23851	0.874973	high
CGGA_1738	1.28493	1	5.3931	2.03746	0.801355	3.18832	2.29358	2.16896	3.47455	4.283	1.4042	0.430953	3.06819	4.48254	6.97627	1.50813	1.70389	0.30011	high
CGGA_P157	1.28767	1	4.93493	1.03582	0.406824	2.67923	2.63614	2.61048	2.71486	3.96737	3.26936	0.563741	2.01007	4.38767	7.01349	0.89521	3.19046	0.323764	high
CGGA_1606	1.29041	1	5.7238	1.86594	-0.055848	0.738812	3.00838	1.49781	2.78106	4.44925	1.96913	1.04701	1.48006	5.09009	6.13937	0.677684	2.09808	0.60039	high
CGGA_1079	1.29041	1	5.00268	0.851013	0.85231	3.31167	2.10549	1.5473	4.23558	4.1747	1.75097	0.479245	3.1467	3.9656	7.51007	2.96184	1.88203	0.552505	high
CGGA_1392	1.29589	1	5.20226	1.40672	0.41634	2.41843	2.56041	0.695604	3.29444	4.12298	1.05535	0.236224	2.54962	4.8215	8.05287	1.71774	0.946212	0.701768	high
CGGA_1444	1.30411	1	5.731	1.66994	0.348268	1.98338	3.92134	2.14577	3.32253	4.60542	1.4108	0.198915	1.687	4.47944	7.55018	1.40394	1.38762	0.831933	high
CGGA_652	1.30411	1	6.03619	2.12622	2.18221	2.05726	2.65338	1.66519	3.0849	4.41741	0.858744	1.43389	3.36628	4.3168	5.54957	1.34318	1.85546	-0.259533	low
CGGA_1594	1.31507	0	5.94836	1.32428	1.54368	1.63166	1.72915	0.790051	0.906348	3.13928	0.810171	1.64959	4.9972	4.15503	7.61863	2.06176	1.29455	-1.01383	low
CGGA_1124	1.32603	1	4.16009	1.29747	0.358736	2.59812	1.21829	1.6615	4.40704	3.84139	1.94949	0.144009	2.48075	4.40307	6.41841	2.21616	1.02682	1.02694	high
CGGA_1388	1.32877	1	5.19024	0.869603	0.54849	0.441851	2.6705	1.65298	3.87761	2.70497	1.93999	1.73442	1.56288	3.70665	5.18192	0.613961	1.96333	0.354057	high
CGGA_1433	1.33425	1	5.42407	0.792892	0.0846813	2.72406	2.3265	2.02708	3.27538	4.21436	2.32119	0.0807363	1.86502	4.25453	4.43679	4.01629	1.30822	1.0783	high
CGGA_374	1.35068	1	4.41957	3.94928	0.145766	0.206562	0.309548	2.44686	3.3244	4.76389	0.561675	2.4258	2.49286	5.12521	6.19754	0.32709	1.75391	0.205466	high
CGGA_1833	1.35342	1	5.65233	0.333224	0.0846814	2.0239	4.16659	2.35864	3.225	5.06986	2.44086	0.121229	1.54211	4.71313	6.51329	2.27831	1.59124	1.30674	high
CGGA_P364	1.35616	1	5.88156	2.72863	0.200838	1.28901	3.18837	2.12557	3.17702	3.81789	1.05535	0.983088	1.86502	4.73232	7.63385	1.39852	1.08	0.46925	high
CGGA_D62	1.36986	1	5.23655	0.232234	0.769032	1.44755	2.33465	0.872418	3.19737	5.64603	2.09727	0.479245	2.82438	4.35584	8.05862	2.08201	1.32516	0.996536	high
CGGA_P185	1.37534	1	5.79904	2.56854	0.89758	1.07268	2.96291	2.9592	2.6473	4.25743	2.30328	2.0649	2.05407	5.14133	6.53072	0.5745	2.99757	-0.0494076	high
CGGA_731	1.37808	1	2.69461	-0.0354485	0.21411	2.09897	0.261606	2.41144	2.41354	4.24563	2.72082	0.0222109	1.70259	3.38288	4.54864	2.08901	1.55178	1.12065	high
CGGA_P358	1.38082	0	6.5565	1.63225	2.58926	2.58692	2.65123	1.26884	3.19321	3.3722	1.14466	1.7119	3.10786	4.19464	6.27868	1.38215	1.74457	-0.371449	low
CGGA_530	1.3863	1	4.95745	0.254607	0.072495	2.26014	1.17166	1.96358	3.27949	4.37996	2.8186	0.483501	1.26844	4.42435	4.31824	1.4254	2.09416	1.14778	high
CGGA_P356	1.3863	0	7.69142	2.72287	2.25677	0.74667	4.6143	1.02397	2.96137	4.22458	0.728983	1.12144	2.70964	5.9035	6.85608	0.650283	0.827453	-0.00259555	high
CGGA_1332	1.39726	0	5.92722	0.485448	0.145766	1.64052	0.081348	1.53362	2.86927	5.19586	1.55659	-0.0353457	3.62351	4.33848	4.32019	3.3682	0.906598	0.777398	high
CGGA_1491	1.4	1	4.51305	1.13072	-0.055848	0.32806	3.5645	2.24868	4.11245	4.1412	1.79183	2.27024	2.08347	5.12716	6.05153	1.83402	1.97553	0.852656	high
CGGA_P269	1.4	1	6.48264	1.6945	0.276569	0.420707	4.78016	0.928638	2.96137	3.99839	0.403642	1.95545	3.32901	6.26058	6.98605	4.00778	1.00629	0.323815	high
CGGA_521	1.40822	1	4.88223	1.5172	0.144012	4.06365	2.72025	2.24247	2.92042	4.54144	2.42766	2.57378	2.49531	5.11673	6.33914	0.473662	3.1758	0.310132	high
CGGA_1739	1.41096	1	5.92133	2.25083	1.74538	1.5985	3.31084	1.42571	3.21497	3.41066	1.30152	1.88396	2.34311	3.97131	5.97058	1.60983	1.79385	-0.167684	low
CGGA_2006	1.4137	0	3.56729	0.254607	0.377864	0.450241	0.777318	0.895302	2.46229	3.22646	1.00427	0.186258	2.64666	3.89234	0.696656	0.879617	1.72945	0.230287	high
CGGA_1693	1.41644	1	6.00572	1.28112	1.01198	4.00891	3.96936	1.4427	2.21512	3.74751	0.759952	1.83289	2.78956	5.42768	6.8617	0.790635	0.910711	0.301822	high
CGGA_2003	1.41644	0	5.85601	0.0560044	1.9725	2.88669	1.20861	0.685785	2.81096	3.46511	1.26566	2.01299	2.82846	3.41997	5.3695	0.918281	2.5334	-0.280568	low
CGGA_835	1.41644	0	5.93823	2.15313	1.95233	1.57648	3.40805	0.548375	1.62227	2.86774	0.361825	2.22945	2.73903	4.42959	6.59297	0.764681	3.1338	-1.14906	low
CGGA_1487	1.42466	1	4.82345	2.05005	2.66276	3.32739	0.0669513	2.11193	3.0379	3.99516	1.60778	2.74808	2.74473	5.07697	6.4313	1.82602	1.9967	0.0355924	high
CGGA_1459	1.43014	0	4.7044	0.288852	0.387587	2.16386	0.482658	2.48394	3.13332	4.07288	3.20607	0.0530871	2.05407	4.38435	6.58084	3.41583	2.72995	0.763808	high
CGGA_P346	1.43014	0	6.19482	1.50794	0.358205	0.943345	2.37183	1.37936	3.51389	4.04826	1.0637	2.12479	2.11735	4.57756	6.14006	2.29279	2.09416	0.330204	high
CGGA_1271	1.43288	1	6.23839	0.52023	0.642705	1.06006	1.15038	1.07492	3.57022	3.55032	2.53663	2.30284	2.93684	4.66046	5.87144	2.47757	1.97906	0.317675	high
CGGA_2002	1.43562	0	6.13255	1.17286	1.03014	1.84709	1.90889	0.945003	2.92943	3.51505	1.25106	2.70104	2.17765	4.18002	3.78785	0.295647	2.83889	-0.230409	low
CGGA_276	1.44932	0	5.74786	1.98134	0.942853	1.97522	2.74059	1.33494	2.24407	2.72236	1.08759	2.53161	2.67849	3.16615	5.42028	0.393344	2.39175	-0.747228	low
CGGA_1354	1.45205	1	5.93378	0.231295	0.0846813	2.0869	3.09664	2.33271	2.9805	4.91143	1.32961	0.0807363	2.05137	4.58734	5.72747	3.1476	1.22415	1.11872	high
CGGA_P337	1.45753	0	6.65026	0.376209	0.593778	2.44349	3.01993	0.705352	2.00822	2.82851	1.65876	2.08514	1.77407	4.35814	4.75785	0.4526	2.55061	-0.129009	low
CGGA_P338	1.45753	0	5.67096	0.254607	0.794211	3.06098	0.591164	0.572788	3.096	3.3735	2.1793	1.40717	2.64666	3.30993	3.73663	0.6129	2.69944	-0.0403322	high
CGGA_1061	1.45753	1	5.27032	3.10931	0.263664	0.293452	3.38456	2.85335	2.92181	4.24105	0.528094	1.76916	2.40048	4.5507	7.45834	0.269554	2.36199	-0.146699	low
CGGA_1287	1.46027	1	5.28537	1.52843	0.419353	0.130521	3.46529	1.28809	3.13457	3.11773	0.71214	0.708411	1.46173	4.53523	6.64545	1.28667	1.83673	0.293484	high
CGGA_869	1.47123	0	4.79923	0.376209	0.276569	0.769977	1.18409	0.826054	3.43275	3.12365	1.13676	0.160601	2.76657	4.75022	7.18187	0.650283	0.963638	0.590696	high
CGGA_P335	1.47123	0	6.6925	1.27563	2.74429	1.28901	3.87869	0.518123	2.94195	3.90563	0.654098	2.39952	3.55215	5.14209	6.91861	1.06314	1.51677	-0.351972	low
CGGA_1553	1.47945	1	6.05615	1.08092	2.04798	1.97704	1.66947	1.79257	2.56411	3.8882	1.14466	1.51115	2.89729	4.34792	5.69979	1.05624	2.43481	-0.292509	low
CGGA_1901	1.47945	1	5.32286	0.777173	0.0601974	1.97067	1.89416	1.76183	4.12171	3.86518	1.35033	0.223896	2.32793	4.38168	8.24475	3.16322	1.03952	0.998195	high
CGGA_1478	1.48493	1	4.37082	0.0954928	0.0601974	1.44315	1.79832	3.29584	3.35776	4.93493	1.36398	0.121229	2.36236	3.84266	6.48018	2.68281	1.43198	1.11314	high
CGGA_P401	1.48767	0	5.85341	0.687351	0.211921	0.909	4.22288	0.936845	2.64954	2.84028	1.65318	1.38543	1.84607	5.19253	5.10898	1.21319	2.15938	0.225554	high
CGGA_831	1.49589	1	4.76929	1.81485	0.0846813	2.88832	2.25986	3.02873	3.73816	4.36907	2.79551	0.462714	1.98178	4.45059	6.13595	1.33184	2.62832	0.689999	high
CGGA_P328	1.49589	0	5.65843	1.85875	0.743115	1.07268	3.25928	2.45767	2.83245	3.10463	1.35033	2.04091	2.36236	4.45754	5.80883	1.54285	1.81786	-0.0303826	high
CGGA_619	1.50685	1	5.38827	0.761272	-0.00303408	3.54915	3.98664	2.39802	3.69435	4.94711	1.63632	2.31084	1.72605	4.10853	5.77359	0.535025	1.8035	1.01524	high
CGGA_1299	1.50685	1	5.47958	0.869603	0.263664	3.05039	1.30871	1.82752	1.8438	5.47429	1.54066	0.008032	2.55835	4.14724	3.91501	2.43103	1.67896	0.665691	high
CGGA_810	1.50959	1	5.48381	1.24785	1.80754	2.88015	0.0669513	1.99009	2.68044	3.61174	2.33184	1.44968	2.04865	4.73746	4.76484	1.51814	1.6726	0.373836	high
CGGA_P326	1.50959	0	6.46694	2.89762	1.6502	1.1908	2.37707	1.68414	2.79908	4.49367	0.905774	2.20091	3.35949	4.35474	6.18571	0.985313	2.10978	-0.504341	low
CGGA_1398	1.51781	1	6.12357	3.15036	0.490144	1.00954	4.11315	3.09153	2.94904	4.57875	1.33655	0.248446	3.16684	5.34568	6.88114	0.105522	2.48346	-0.174549	low
CGGA_545	1.52055	1	4.73598	1.85576	0.358736	0.402672	3.71167	1.62716	3.4425	2.61825	2.09089	2.18811	2.21759	4.24052	5.2795	0.916963	2.51408	-0.107555	low
CGGA_796	1.53151	0	3.99297	0.0434585	0.434183	3.7698	0.24939	2.80583	2.86395	3.21256	2.90046	0.944697	2.21759	4.77277	6.84134	2.07498	2.16714	0.76172	high
CGGA_P308	1.54247	1	6.31911	1.13072	2.57024	2.60308	3.10285	1.57647	2.60175	4.32454	0.88714	1.10152	3.8263	3.71477	4.75785	0.847905	1.98404	-0.498904	low
CGGA_1598	1.54521	1	6.01999	2.02475	1.16176	1.15061	4.58275	1.70746	3.37311	3.22937	1.34345	2.38331	2.1403	5.41995	6.30341	2.89346	0.739042	0.466995	high
CGGA_850	1.54521	0	2.80026	0.0890185	0.21411	1.81909	1.71602	2.26804	2.29283	4.65002	2.25704	0.182461	1.78584	4.24472	5.45149	2.97545	1.88481	1.10596	high
CGGA_P319	1.54795	0	5.70949	1.61946	0.0601974	0.121432	4.07762	1.78386	3.06728	4.54304	1.04696	0.236224	1.44132	4.84682	6.70085	0.494414	1.12711	0.865997	high
CGGA_P316	1.55342	0	5.35364	0.940929	2.80356	2.10728	0.451529	0.61498	0.990328	2.93989	0.390591	1.43917	5.23145	3.71586	7.17286	1.79768	0.892624	-1.11026	low
CGGA_1035	1.55342	1	7.1032	0.162211	0.719595	1.15523	1.49225	1.01415	4.51357	2.639	2.36901	0.898833	2.36886	5.36743	6.35936	0.537434	1.12386	0.71059	high
CGGA_P314	1.56712	0	8.20331	3.23234	2.40106	0.754483	3.98008	0.912073	2.11752	3.71687	0.479624	2.06829	2.81662	4.95982	6.9439	0.668609	1.08796	-0.669258	low
CGGA_632	1.57808	1	4.40902	2.70385	0.295935	0.176561	1.87735	2.51298	3.10129	4.73292	1.43741	1.32682	3.00084	4.99408	8.89704	0.822597	2.41319	0.117801	high
CGGA_P311	1.59178	0	5.84445	1.64493	0.81553	0.526007	2.58086	1.54033	3.60835	3.93305	0.697352	1.93698	2.32137	4.9361	6.84733	0.970689	1.33518	0.399634	high
CGGA_1103	1.60274	1	4.51036	2.26966	-0.0160446	0.0449571	3.52855	2.35578	3.14248	4.34576	1.54899	2.75646	1.72255	5.45334	5.0158	0.6129	2.10199	0.557171	high
CGGA_1378	1.60274	1	1.85662	0.0425855	-0.055848	0.349199	1.06805	0.780898	0.658205	2.07792	1.51869	0.0248904	1.13679	4.43657	1.91718	0.222641	1.13482	0.536851	high
CGGA_1615	1.60548	1	5.35447	0.816139	0.89758	2.60909	0.0669513	0.724638	0.949025	2.24807	1.17585	1.16685	4.85734	3.4574	7.04341	3.54725	0.578328	-0.703735	low
CGGA_1077	1.61918	1	5.97606	0.103924	0.311849	2.69761	0.285758	0.782845	4.02779	4.42248	0.414636	0.0362541	1.73625	5.11119	8.38467	1.08958	0.283595	1.46932	high
CGGA_1690	1.62192	1	5.16237	1.28659	0.551562	1.93836	3.4477	2.10506	3.09757	4.42617	1.33655	0.21146	1.93516	4.81133	6.33575	1.21319	1.29455	0.825471	high
CGGA_P306	1.62192	0	7.04308	2.64381	2.4417	1.36577	4.73279	1.92872	2.396	3.85711	1.03852	3.04163	3.64168	4.46258	6.66577	0.910632	1.91898	-0.847904	low
CGGA_1148	1.63288	1	4.05883	1.25903	0.318006	0.562368	0.387089	1.81836	2.97877	4.27845	1.35717	2.81985	1.88678	3.64427	7.7032	3.28523	1.98404	0.532006	high
CGGA_1680	1.63288	1	4.4726	3.15739	0.132353	0.909	0.941394	2.92399	3.65718	4.73808	1.4815	1.24753	2.03226	3.80136	6.93429	1.33184	1.56305	0.567891	high
CGGA_P165	1.63836	1	1.73145	0.397209	0.348268	0.370016	1.5418	0.734179	0.477636	1.68103	1.34345	0.602227	2.84456	2.55233	1.39379	0.171785	0.883494	-0.335278	low
CGGA_1559	1.65205	1	7.31611	2.01514	2.24218	0.722957	5.01772	1.75292	2.4493	3.33257	0.479624	2.36965	2.29255	5.0889	5.65646	0.89521	1.33518	-0.31222	low
CGGA_1214	1.65479	1	5.59073	2.28932	0.21411	2.55877	3.84347	1.17918	2.50621	4.78833	1.25613	0.117803	1.43337	4.56603	4.73746	2.34815	1.1655	0.797734	high
CGGA_1972	1.66027	0	5.71303	0.0692935	0.266008	2.34523	2.907	1.88484	3.37945	4.59829	3.19427	0.331185	1.78079	4.1977	6.05548	4.20217	1.86931	1.16451	high
CGGA_669	1.66301	1	5.95882	1.2175	2.77828	2.45806	1.41199	0.695821	1.78397	3.41756	0.48666	1.23095	4.57966	2.80584	4.90851	0.798049	2.17171	-1.27529	low
CGGA_1105	1.66849	1	6.97594	1.33948	2.04264	1.41909	2.88141	1.05087	2.88252	4.07015	0.775858	0.996453	2.54067	4.83072	2.29879	0.467117	1.10496	0.12618	high
CGGA_247	1.66849	1	5.86683	3.65414	0.145766	0.517547	3.57689	2.65489	2.53112	2.30522	0.999492	1.52712	2.59331	5.21317	2.79482	0.764681	2.16025	-0.61881	low
CGGA_274	1.67123	0	5.09504	1.05289	0.477932	1.36808	3.088	1.13938	3.42394	4.33822	2.14926	0.827234	1.92858	4.60443	8.2715	1.64537	1.33331	0.905935	high
CGGA_804	1.68219	0	4.18072	0.652326	0.374089	1.19676	1.50339	1.691	2.71233	2.95097	1.06496	1.61072	2.25801	3.27649	4.62257	0.547216	1.85104	0.0976278	high
CGGA_509	1.70685	1	5.23336	2.25354	-0.0291821	1.77899	2.03156	3.72668	3.89983	4.34452	2.86372	1.49095	1.7707	4.90654	6.90577	1.11716	2.01341	0.865381	high
CGGA_1694	1.70959	1	4.34158	0.60027	0.0226159	3.58088	0.319504	1.65081	3.37311	4.36053	1.4239	0.198915	2.00727	4.10689	6.02677	3.23296	1.10375	1.19117	high
CGGA_P298	1.73699	0	6.70526	2.73626	2.62467	0.800446	4.38596	1.73944	2.8421	3.99192	0.654098	1.88009	2.63643	5.13177	6.05534	0.730941	2.51304	-0.602353	low
CGGA_1425	1.75342	1	4.77236	4.01956	-0.0291821	2.88015	3.96853	2.40906	2.56887	4.49367	1.23632	0.861833	2.55693	3.76717	7.63048	3.95291	0.937419	0.300717	high
CGGA_492	1.7863	0	4.93877	2.11132	0.167031	1.77899	4.88064	1.95975	3.2406	4.13103	1.90451	1.25355	2.60346	5.06816	6.84857	0.76536	1.8921	0.388916	high
CGGA_1678	1.8	1	1.39245	0.0153486	-0.055848	0.526007	0.0669513	1.33135	0.489697	2.36258	1.12083	0.0248904	1.56611	3.04637	0.696656	0.431219	1.08	0.340319	high
CGGA_P286	1.80274	0	7.28573	3.63826	2.62467	1.51191	5.39518	2.63396	2.42293	4.54304	1.18355	2.48046	2.98234	4.55838	5.38885	0.353726	2.28839	-0.788011	low
CGGA_710	1.80822	1	3.14001	1.62394	0.840654	1.6468	0.704497	1.07492	2.7463	3.4071	1.74822	1.86065	2.13459	3.00863	5.33363	0.425406	2.47567	-0.0557789	low
CGGA_D35	1.81096	1	3.38441	0.162211	0.311849	1.72624	0.982159	0.332932	3.13457	4.66578	1.73995	0.182461	2.72814	6.04754	8.19113	1.80544	0.763559	1.35761	high
CGGA_P283	1.81918	0	4.94414	0.661801	0.481137	1.94162	3.45011	2.29434	3.14704	4.11931	3.25994	0.160601	1.50108	4.01308	7.50576	2.88022	1.47501	1.0822	high
CGGA_P279	1.83014	0	7.58418	4.0203	0.808461	1.09106	4.35935	1.8141	2.51545	4.2488	0.810171	2.42349	2.34526	5.08136	6.29026	0.514866	1.24564	-0.218734	low
CGGA_888	1.83288	1	6.9288	3.69342	0.850327	0.295724	3.87515	2.85069	2.05164	3.53244	1.1912	2.27904	1.46299	5.6689	4.1596	0.295647	1.94971	-0.216792	low
CGGA_1226	1.83562	1	5.29536	0.344097	1.56	3.07667	0.419684	2.28533	2.99082	4.19714	1.78161	1.26551	2.99533	3.62228	6.75429	1.57195	2.4502	0.115902	high
CGGA_P280	1.84932	0	6.22137	0.745185	2.80356	2.85367	0.628605	1.34955	2.33754	3.93051	0.739378	1.08809	3.71803	3.5687	5.77139	1.21937	1.99249	-0.55602	low
CGGA_1403	1.86027	1	4.2241	1.68636	-0.0291821	0.390519	3.80517	2.69316	3.23353	4.26798	2.67996	0.236224	1.52994	5.58229	4.05479	0.871756	2.1964	0.90662	high
CGGA_P99	1.86027	0	6.33433	2.42362	1.49775	1.8295	3.56561	1.58662	3.20776	4.31063	0.86827	2.36416	3.26366	4.28495	7.93172	0.622339	2.15186	-0.369125	low
CGGA_564	1.86027	1	3.80674	0.351107	0.575932	3.71106	1.35205	2.7343	2.95531	4.28856	2.88873	1.51186	1.89761	3.9784	5.7424	2.63118	2.34992	0.875575	high
CGGA_1023	1.86575	1	5.92917	0.598591	0.374089	2.66736	1.5309	3.45965	4.00558	5.91039	1.11426	0.0639437	1.44286	3.88981	9.3275	2.98124	1.35349	1.51158	high
CGGA_802	1.86575	1	4.27524	0.13333	0.374089	1.3078	0.212165	2.54893	3.42187	3.37539	2.36032	0.144009	2.19025	4.30322	4.49051	0.537434	1.38128	0.869758	high
CGGA_1223	1.86849	1	4.85503	0.0153486	0.0846813	3.21933	3.07786	2.97376	3.3845	4.62657	2.97314	0.248446	2.61571	4.18156	6.33142	4.51408	1.4068	1.23474	high
CGGA_D38	1.88767	1	3.66468	2.32729	0.145766	0.0178679	2.87909	1.82752	1.40205	3.12983	2.36554	1.26764	3.56327	3.74647	5.47852	2.35694	2.39371	-0.611601	low
CGGA_1503	1.89589	0	1.13915	0.0425855	-0.0291821	0.158118	0.272544	0.437671	0.402793	1.69981	1.14466	0.0248904	1.2226	2.35347	1.27939	0.319166	0.989384	0.176568	high
CGGA_139	1.90137	1	5.69228	0.67037	2.70847	1.84359	1.72915	1.63138	3.22785	4.12372	1.4042	1.56526	2.94792	3.47703	5.1419	1.12377	2.17059	-0.147163	low
CGGA_1626	1.90685	1	4.9601	1.34012	0.0352599	3.00831	1.87176	2.92587	3.56637	4.05291	1.64758	0.611688	1.38778	4.49976	6.83382	1.70906	1.5401	1.04296	high
CGGA_1087	1.92055	0	7.40004	3.61937	1.01198	0.983449	4.3939	2.211	2.06227	3.23949	1.4108	3.02268	2.54226	4.66041	5.79935	0.78226	2.78909	-0.957671	low
CGGA_1321	1.92329	1	6.27446	3.64712	0.577051	0.66597	3.49863	3.22261	3.34222	4.92064	1.66432	2.70971	2.28129	5.10112	5.86935	1.59102	2.35532	0.107241	high
CGGA_1048	1.92603	0	5.3818	2.00223	2.54315	2.55817	4.39024	3.13398	2.43354	4.64837	1.09662	2.15381	2.18255	3.56749	6.18095	1.6284	2.05839	-0.0842624	low
CGGA_1234	1.93151	1	4.16526	0.0890185	0.279874	0.736792	0.309548	0.515661	3.01585	3.72888	2.14722	1.01809	2.12046	4.185	6.244	0.245908	1.08582	0.860569	high
CGGA_236	1.93425	0	7.72151	3.31336	1.03939	0.636527	5.01895	2.04826	0.990684	3.49928	0.44391	2.4009	2.62776	4.88387	4.31583	0.221883	2.41125	-1.06515	low
CGGA_1601	1.94521	1	4.6188	1.52181	0.387587	2.00223	2.75848	1.99009	3.7703	4.2075	2.71858	0.107859	1.24827	4.2828	6.30677	1.96706	1.69872	1.07031	high
CGGA_1764	1.94521	1	6.23052	2.67995	0.863998	0.859415	3.07943	2.72182	3.60835	4.87475	1.11281	1.50613	2.60872	4.86888	6.06568	1.86555	2.58721	0.0770253	high
CGGA_P271	1.94521	0	1.08339	0.231295	0.0601974	0.13377	0.107896	1.05431	0.402793	1.60808	0.86827	0.861833	1.79079	2.04035	0.653509	0.105522	1.38117	-0.215066	low
CGGA_1507	1.9589	1	4.86035	0.322265	0.108728	3.3321	0.834197	1.85201	3.58592	4.14913	2.28879	1.67663	2.73842	4.07967	8.09227	1.49298	1.6831	0.79812	high
CGGA_1612	1.96712	1	4.968	0.354885	0.602065	2.57877	0.319504	2.0452	3.17998	4.28689	2.1436	0.441619	2.14786	4.54426	6.82736	0.650283	0.972271	1.07444	high
CGGA_1075	1.9726	0	4.79149	1.11226	0.200838	2.19942	1.42214	2.69761	3.85692	4.13902	2.33184	0.387472	1.99033	3.78385	6.82815	3.33701	1.49305	0.990289	high
CGGA_1066	1.98082	1	5.2367	0.926822	0.50798	0.909	2.05814	2.10161	2.72964	3.71586	1.16812	1.58919	3.02977	4.20531	6.67953	3.11902	2.47145	-0.0513492	low
CGGA_1543	1.98082	1	5.15462	1.37126	0.472069	2.68491	1.88673	1.30669	3.62623	3.67623	0.877735	0.885368	2.42654	4.83875	8.38309	2.18199	1.1876	0.646751	high
CGGA_P15	1.98082	1	5.55907	0.912569	0.610301	0.440467	2.23981	1.20329	3.0494	4.39555	0.697352	1.47046	3.30793	4.35814	7.923	1.06314	1.97979	0.0635597	high
CGGA_1039	1.99178	1	6.16791	0.813181	1.08063	0.747569	0.24939	2.63808	3.39265	3.88301	1.70352	1.81977	3.10529	4.63734	5.11602	1.5782	1.72004	0.246969	high
CGGA_659	2	0	5.68587	0.312445	3.7888	2.31353	0.819762	0.831653	1.83535	3.02448	0.657667	1.23713	5.15387	2.67986	4.15122	1.03421	1.77806	-1.33947	low
CGGA_1185	2.00274	1	4.82134	2.31433	-0.0160446	2.49227	2.7723	1.86442	3.04776	3.96075	1.95551	2.16969	0.977453	3.3773	5.97994	1.48279	1.78899	0.601546	high
CGGA_P265	2.00822	0	1.12346	0.0153486	-0.055848	0.145999	0.440995	1.32523	0.402793	1.65716	1.17585	0.0530871	1.02677	2.7811	0.642486	1.54774	0.666285	0.434946	high
CGGA_1604	2.0274	1	6.4031	1.48923	0.525583	0.251381	1.92348	1.61663	2.99424	3.74849	1.94178	0.780445	1.29322	4.5413	6.46487	0.295647	0.543896	0.831414	high
CGGA_1157	2.03014	1	5.80447	0.626978	1.34972	3.88218	0.665059	1.89695	2.54486	3.87762	1.62497	0.27258	3.27409	4.10934	6.7628	1.75195	1.52848	0.188418	high
CGGA_1587	2.05479	1	5.67568	2.7589	0.0477864	0.251381	4.09513	1.89695	3.35518	3.78317	2.0267	1.77992	2.12249	4.97282	5.34651	1.1819	1.58564	0.344134	high
CGGA_1850	2.05479	0	6.76729	2.12028	1.17262	1.25165	4.10267	1.75738	2.99424	3.67417	0.86827	2.61363	2.41233	4.38767	4.97933	0.992568	2.51304	-0.377319	low
CGGA_1034	2.06301	1	4.32426	2.2465	0.327618	3.75752	3.50963	1.62282	2.87458	3.11975	2.24759	0.117803	2.17646	4.24556	5.67066	0.197468	2.12057	0.164436	high
CGGA_1911	2.08767	0	4.75249	0.133879	0.0477864	0.74667	0.513104	2.70425	2.5901	4.71633	3.60852	0.452206	1.67614	4.88876	4.38672	2.64742	1.08	1.46058	high
CGGA_1619	2.09863	1	4.7728	3.48267	0.870782	1.43844	2.52563	2.37847	3.33569	4.66835	0.995578	2.29069	2.94658	3.89712	7.1046	1.02122	1.62434	-0.0124286	high
CGGA_D57	2.09863	1	3.97633	0.13333	0.756804	2.62617	0.802567	1.02033	3.65954	3.62995	2.07374	1.01809	1.45231	3.90114	7.55766	3.13848	1.81647	0.988161	high
CGGA_1017	2.10411	1	5.63409	0.823802	2.41403	2.4592	0.977753	1.71208	2.94372	3.90736	1.88073	1.19216	3.23077	3.25597	4.22385	1.00697	2.9934	-0.485837	low
CGGA_1263	2.11507	1	5.13337	0.803583	1.07041	3.616	1.09387	1.69517	2.27901	4.9086	1.40589	1.12837	2.84523	3.23139	8.87706	3.03613	1.78105	0.336283	high
CGGA_904	2.12055	1	5.50266	2.73039	1.61974	0.236032	4.04838	3.02362	2.95786	5.59715	0.399758	1.53217	3.26237	4.43559	6.17888	0.556935	2.11821	-0.141951	low
CGGA_P177	2.12603	0	4.8966	1.46547	0.15557	3.40761	4.14269	2.72834	3.2685	4.35501	2.74289	3.29494	2.35598	5.45455	5.90005	0.494414	3.87292	0.20362	high
CGGA_P178	2.12603	0	0.831895	0.0153486	0.453748	0.170131	0.0669513	0.484229	0.402793	1.07932	0.586754	0.0530871	1.90514	1.5544	0.883448	0.0918882	0.728873	-0.251454	low
CGGA_P179	2.13151	0	5.54798	1.45585	1.58013	1.48937	2.88725	2.26713	2.5204	3.81604	2.16749	2.04091	2.72571	3.81964	4.73072	0.999786	3.30089	-0.489625	low
CGGA_1906	2.13425	0	5.94283	1.2309	1.1453	1.62345	2.23981	1.11302	3.06404	3.84538	0.551898	1.34093	3.28135	5.26537	7.09934	1.52807	1.73955	0.0266089	high
CGGA_1037	2.13699	0	6.11422	2.09928	2.9968	2.52668	1.51771	0.260778	1.63009	3.59098	0.586754	1.42858	5.06611	3.65457	7.21758	2.42466	1.59681	-1.26318	low
CGGA_D50	2.14247	1	6.17464	3.05868	2.64657	0.10898	5.01695	1.97501	2.35733	3.56878	1.50021	2.67913	2.3517	5.04423	5.04403	0.86385	2.73748	-0.764045	low
CGGA_P173	2.14247	0	5.05219	0.785055	0.368071	0.606496	2.76244	2.14242	2.88558	3.024	3.03819	2.24351	1.99317	3.84959	5.74034	0.59383	3.69626	-0.187304	low
CGGA_1126	2.14795	1	5.58442	3.87447	1.38713	0.571308	3.39607	2.71087	3.08172	3.53933	0.749701	2.06149	2.67023	4.47571	7.58336	0.64103	1.9967	-0.513496	low
CGGA_1903	2.15068	0	7.38182	3.31721	1.54778	1.47567	2.22239	1.20329	1.09938	2.81066	0.707971	2.06149	4.16732	4.95721	7.55044	2.63843	1.45673	-1.21963	low
CGGA_1902	2.16438	0	5.95782	2.69375	1.23083	0.420707	3.55113	1.02397	2.85549	3.9177	0.350732	1.89549	2.67854	5.0319	7.50718	0.985313	2.42551	-0.417877	low
CGGA_P110	2.19178	1	5.58925	3.47824	0.00985197	1.76792	5.35771	2.14577	2.25825	4.25345	1.51869	2.40488	1.31753	4.65606	6.60305	0.5549	1.9056	0.19806	high
CGGA_1829	2.19452	0	6.28719	0.376209	2.46261	2.74231	0.646952	1.8141	2.41491	4.22526	0.905774	0.861833	3.41372	3.20295	5.33615	0.839865	2.48645	-0.466733	low
CGGA_P172	2.2	0	1.09151	0.121202	0.297447	0.909	0.842135	1.15543	1.06915	1.99126	1.63632	0.21146	1.90514	2.23545	1.96425	0.0501771	1.27379	0.106944	high
CGGA_P176	2.20274	0	5.90321	2.24812	1.86696	1.36078	4.15867	2.34718	2.32034	3.68138	2.22179	2.82783	2.16035	4.18542	5.51693	0.622339	3.87968	-0.75911	low
CGGA_P183	2.21096	0	6.20796	3.30719	1.15629	1.03515	4.30844	2.64785	2.31165	3.29032	1.494	2.68134	2.48956	4.91151	4.80125	0.484076	3.14038	-0.808353	low
CGGA_1049	2.21644	1	2.25231	0.0434585	0.311849	1.47554	0.785182	1.29861	4.30771	3.89533	2.88519	0.130965	2.72814	4.05041	6.03292	1.64537	0.70216	1.38353	high
CGGA_1473	2.2274	0	4.26863	2.12919	1.18874	5.20238	1.20252	2.30329	2.95434	3.73178	1.33655	3.17391	3.28135	4.38302	5.39308	2.5715	3.14979	-0.332187	low
CGGA_1735	2.2274	1	5.30488	0.926822	0.917335	3.49804	1.98726	2.44434	3.43032	3.64491	2.90751	3.26014	2.1801	5.14018	5.29331	0.6129	3.56506	0.164551	high
CGGA_P174	2.23562	0	5.74608	2.48663	1.87981	0.922842	3.37334	2.20461	2.11075	3.3748	1.74529	2.44187	2.10443	4.40482	5.47877	0.985313	3.48281	-0.769566	low
CGGA_P155	2.23836	0	5.38342	1.04236	2.36138	3.04219	0.12128	1.73944	2.55211	3.99759	2.27784	2.75018	2.5441	4.3445	5.30322	1.26186	3.45733	-0.325944	low
CGGA_P153	2.2411	0	1.36016	0.20758	0.551562	0.507457	0.107896	0.977148	0.477636	1.67153	0.707971	0.296312	2.20915	1.95131	0.937077	0.145652	1.15768	-0.311807	low
CGGA_1472	2.24384	0	5.73591	1.43151	0.930346	3.13771	1.76213	0.861122	1.51653	3.40052	0.718514	2.27904	3.68232	4.82871	6.29087	1.35442	1.86471	-0.496954	low
CGGA_P156	2.25205	0	6.03038	2.3323	1.45458	0.84491	4.40604	2.14242	2.48026	3.66899	1.66986	2.96967	2.66186	3.97941	5.5914	0.76536	3.57344	-0.85053	low
CGGA_1410	2.26027	1	4.5796	1.07457	0.178394	0.469581	0.147666	1.64113	3.0705	3.74065	2.71039	0.296312	1.53401	5.1561	3.71116	3.80018	3.13471	0.581515	high
CGGA_D11	2.26575	1	5.31274	0.073974	0.589493	2.78833	2.80039	2.02432	2.41354	4.48618	2.88519	0.0639437	2.09911	4.34876	9.56143	4.48308	3.00312	0.587761	high
CGGA_P112	2.28493	1	5.4238	0.478139	2.28783	2.03002	0.709319	1.36751	2.24913	3.78222	1.85169	1.05394	2.83434	3.43077	3.938	0.5549	2.94661	-0.4429	low
CGGA_1718	2.28767	0	5.8437	2.88402	1.68391	1.36577	3.71067	2.03798	3.60411	3.98705	0.780245	2.05466	2.53115	4.72974	6.32093	0.64103	2.16686	-0.19248	low
CGGA_825	2.29041	1	4.785	2.43551	0.499092	1.43371	3.31748	1.88484	3.62204	3.8381	0.978048	2.83774	2.49722	4.37834	6.71086	0.739624	1.91898	0.119903	high
CGGA_D24	2.29315	1	3.20287	3.18391	0.358736	1.7791	2.6758	2.26204	2.28247	4.46892	0.723951	1.14816	1.62504	3.65996	6.89406	1.15602	2.39175	0.109502	high
CGGA_1051	2.29589	1	5.1659	0.728908	2.53137	2.21017	1.73332	1.18299	2.59943	3.43569	1.35033	1.37444	3.51828	2.75259	5.81841	0.790635	2.57325	-0.720625	low
CGGA_1536	2.30137	1	5.42407	1.59351	1.05987	0.682496	3.2988	2.39802	3.16511	2.97207	1.53694	2.74386	2.00165	4.19999	6.58755	0.94098	3.89979	-0.541641	low
CGGA_1567	2.30137	1	6.09807	2.51149	2.106	2.87193	1.70389	0.936845	2.75252	3.33123	0.739378	1.04701	3.89134	4.37968	6.52017	1.37112	1.30822	-0.572471	low
CGGA_1651	2.30685	1	5.85564	0.883612	2.88482	2.64266	1.90523	1.3911	2.55452	4.39376	0.951356	1.50613	3.89326	3.46134	5.9815	1.52311	1.66201	-0.388496	low
CGGA_1882	2.30685	0	6.80733	3.13906	1.6765	1.38553	3.68752	0.762404	1.61518	3.53474	0.575226	2.30224	3.52768	4.5712	7.22092	1.3089	1.73451	-0.95987	low
CGGA_P158	2.31233	0	1.55381	0.745185	0.348268	0.0964137	0.147666	0.61498	1.25398	1.32443	0.790287	0.342622	2.15037	2.49728	1.0298	0.105522	0.989384	-0.217578	low
CGGA_P182	2.31781	0	4.65393	0.618133	0.41634	1.32023	0.147666	2.00871	3.00952	3.34326	2.26679	0.353968	1.59742	4.7719	5.45653	0.44195	2.02993	0.67591	high
CGGA_1324	2.32329	1	6.29239	1.88562	1.11094	1.104	4.19774	0.209281	2.23347	2.56807	1.26402	2.5694	2.98623	4.10134	5.2348	1.23823	2.51589	-0.869677	low
CGGA_1791	2.34247	1	1.6613	0.0153486	0.406824	0.410718	0.43038	0.594049	0.402793	1.98001	1.12083	0.107859	2.29031	2.18588	1.85992	0.0501771	1.08	-0.179044	low
CGGA_1880	2.34247	0	6.95293	2.90606	1.07739	1.28901	2.96291	1.59167	2.93302	4.31063	0.350732	2.46001	2.71126	4.53892	5.41378	0.963321	2.20005	-0.383083	low
CGGA_D45	2.34521	0	8.64965	3.2318	1.38812	0.996542	4.2048	1.7282	1.43271	2.83298	0.764495	2.3498	3.66039	5.23622	4.93894	0.134634	2.92768	-1.5706	low
CGGA_D28	2.35616	1	6.3028	2.67797	1.27665	0.295724	3.12435	1.88889	2.80107	4.01124	1.36398	2.1442	2.09922	4.27705	6.37694	1.06314	3.06082	-0.452003	low
CGGA_P137	2.35616	0	5.46522	2.67995	1.42352	0.32806	3.06996	2.26713	2.57125	4.07441	1.65318	2.58797	2.02951	3.84266	5.41451	1.33184	3.56646	-0.579166	low
CGGA_P147	2.36438	1	5.95112	2.45898	0.593778	1.13302	4.80801	2.07017	2.23994	3.2792	1.72945	2.83774	1.8073	5.10034	4.62836	0.431219	2.54203	-0.225622	low
CGGA_878	2.36438	1	2.3826	0.0434585	0.145766	1.60881	1.57925	2.89544	2.54346	4.7674	2.43331	-0.0353457	1.22451	4.08115	5.93748	0.556935	1.26253	1.49238	high
CGGA_1870	2.36712	0	7.6743	4.64442	2.52742	1.29426	4.02057	1.75292	2.28226	3.3735	0.820014	2.76272	2.76966	5.50704	5.9591	0.910632	1.65135	-0.939662	low
CGGA_1467	2.3726	1	1.73631	0.407589	0.189663	0.240066	0.353709	0.705352	0.679091	1.76352	1.31563	0.198915	1.52176	4.35746	2.30576	0.184672	0.759167	0.363844	high
CGGA_1875	2.3726	0	6.08172	3.11904	0.666584	2.49227	3.21574	0.705352	2.42293	3.00348	0.598193	0.720573	2.30371	4.9711	6.953	2.02742	1.30822	-0.148689	low
CGGA_1108	2.38356	1	4.43367	0.961822	0.551562	2.56851	2.7405	2.8084	3.64797	4.44581	2.58771	1.32388	1.643	4.82005	4.85586	2.26075	2.10589	1.04347	high
CGGA_1715	2.38904	0	5.7028	2.94256	0.178394	3.90091	4.27099	3.1798	2.84977	3.77746	1.2729	2.34195	2.03501	4.46697	4.82885	1.17556	1.49902	0.271235	high
CGGA_P163	2.41096	0	5.8832	2.41404	1.08318	1.19644	3.57994	2.48654	2.71698	3.53704	1.96007	1.34657	1.55016	4.48439	6.13402	0.5745	3.18863	-0.233612	low
CGGA_1383	2.42192	0	8.02618	2.88231	2.14858	0.936545	4.11091	1.4427	2.39328	2.99483	0.739378	1.68553	2.68844	5.3584	6.04402	0.504677	1.28074	-0.599513	low
CGGA_P164	2.4274	0	0.954911	0.0824555	-0.055848	0.0964137	0.12128	1.36155	0.78826	1.52018	1.17585	0.21146	1.50939	2.4117	1.57445	0.0642182	1.34848	0.0649828	high
CGGA_P142	2.4411	0	5.21898	1.75405	2.02807	1.41464	2.07123	1.6747	2.65177	2.96321	1.88552	2.81785	1.79079	3.53924	5.98815	0.948466	3.83279	-0.731959	low
CGGA_P144	2.44384	0	5.51946	1.15495	1.9725	1.81883	2.76244	1.76627	3.01625	3.52898	1.61926	2.13776	2.73684	3.95131	4.97518	0.650283	3.45884	-0.55681	low
CGGA_861	2.44658	1	4.77411	0.507301	0.801355	2.18312	2.05154	2.02343	2.396	3.64385	2.50828	2.05466	1.92623	3.29813	6.29691	0.918281	2.51011	0.187491	high
CGGA_1004	2.46301	1	4.09985	0.620299	0.668714	3.35261	1.38829	2.60395	3.86915	3.70047	1.82824	0.437313	2.8659	3.99887	7.86874	1.03421	2.44571	0.426024	high
CGGA_1863	2.47123	0	7.36794	2.80309	2.15902	1.57737	4.62052	1.01628	2.46229	3.38386	0.770133	2.60435	2.94658	4.97455	5.81824	0.564734	1.84148	-0.729928	low
CGGA_157	2.50411	1	6.40767	3.3936	2.57215	0.807958	3.38853	1.10582	2.75458	4.67222	0.951356	1.01185	3.34876	4.64512	6.80867	1.1945	1.66732	-0.499672	low
CGGA_P151	2.50685	0	6.09516	1.26458	2.5587	2.07513	2.07774	1.40852	2.92764	4.02791	0.686656	1.78406	3.43679	3.63274	6.44916	0.831778	2.25019	-0.539632	low
CGGA_1728	2.51233	1	5.22848	3.36138	0.377864	1.03515	3.46568	2.1085	3.11012	5.35086	1.39757	2.06829	1.65414	4.46384	5.6228	1.08364	2.1443	0.416138	high
CGGA_P128	2.51781	0	5.56095	1.45585	1.7699	1.8782	3.04598	2.18852	2.44145	3.40433	1.66432	2.06829	2.54042	3.85452	4.77506	0.902942	3.24937	-0.589439	low
CGGA_1140	2.52329	1	6.54754	0.245881	2.67528	2.82266	0.609739	0.342086	4.14312	3.13385	0.820375	1.59147	3.53255	2.6565	5.49958	0.893922	2.05773	-0.472985	low
CGGA_780	2.52877	1	5.64401	0.704125	2.97002	2.85033	0.818183	2.15243	3.13791	4.03813	1.46255	1.22931	2.99663	3.84959	4.42392	0.963321	2.00508	-0.066825	low
CGGA_1695	2.53973	0	6.27619	3.01122	1.49349	1.14477	4.22219	1.59167	3.16062	4.97994	0.858744	2.00237	3.08155	4.28853	6.18795	0.353726	2.09808	-0.290281	low
CGGA_901	2.54247	1	6.25958	2.32975	0.41634	0.306589	3.8609	3.11781	2.5204	4.10004	0.88714	2.64788	1.90209	4.4676	5.0571	1.47767	2.79391	-0.176359	low
CGGA_1205	2.54521	1	0.918321	0.158887	-0.0160446	0.714961	0.408904	0.762404	0.477636	2.47049	1.09662	0.353968	1.2226	3.40909	0.945796	0.271729	1.17272	0.450733	high
CGGA_P131	2.54521	0	5.86213	3.04659	1.85724	0.800446	4.10942	2.03072	2.88372	3.81139	1.4042	2.23751	2.53857	4.26475	5.86612	0.847905	3.79867	-0.901025	low
CGGA_1854	2.5589	0	6.83234	3.21364	1.37787	0.459945	3.56782	1.2495	3.107	4.11563	0.44212	2.0305	2.78804	4.69578	5.96635	0.902942	1.82261	-0.394643	low
CGGA_P132	2.56438	0	5.39337	1.5715	1.9903	0.553368	3.56006	1.93263	2.39872	3.09019	1.89029	3.02614	1.90817	3.64427	4.74998	0.319166	4.77532	-1.07529	low
CGGA_1736	2.56986	1	5.00388	0.344097	0.0846813	2.42531	1.46318	1.51391	3.59878	4.1383	1.73474	0.342622	1.6725	4.51435	6.55412	1.42007	1.50496	1.10523	high
CGGA_P121	2.57808	0	6.26227	0.526404	3.91191	2.55817	0.984912	0.540256	2.21512	4.06983	0.377423	0.961125	4.13757	4.03219	5.65122	1.07684	1.79385	-0.720074	low
CGGA_1197	2.58082	1	6.46213	2.04066	1.61974	0.704037	4.05614	1.7726	1.38138	2.63124	1.17028	1.72561	3.43789	3.91443	5.4862	0.349501	2.58799	-1.2478	low
CGGA_1356	2.59726	1	6.0307	0.823802	2.32281	2.41383	1.45812	1.51391	2.8421	3.85621	1.39757	1.34657	3.49227	3.42943	6.09565	0.748255	2.25721	-0.435758	low
CGGA_616	2.60822	1	3.26972	0.103924	0.180273	1.7322	-0.0464149	3.01782	2.69802	3.872	2.21107	0.468874	1.7529	3.416	5.68676	2.17386	1.42391	1.00923	high
CGGA_1450	2.62192	1	9.35457	2.25437	6.47894	0.221362	5.44415	1.24535	1.73136	3.19901	0.47256	2.47171	3.44993	5.44229	0.951439	0.84675	2.11346	-1.72956	low
CGGA_P115	2.6274	0	1.42393	0.0153486	-0.00303408	0.516763	0.223935	0.625326	0.536837	1.77678	0.978048	0.0248904	2.08082	2.85089	1.97955	0.33078	0.728873	0.113509	high
CGGA_1309	2.6411	0	7.23233	2.71517	3.07276	0.440467	3.19418	0.495622	1.82668	2.69593	0.350732	2.06149	3.68458	4.86655	6.82269	1.21319	1.46894	-1.22787	low
CGGA_1840	2.6411	0	6.19596	1.05533	1.70956	2.9379	3.46091	1.64113	3.47572	3.99597	1.39757	1.00472	2.62611	4.26548	4.63657	0.887435	2.19274	0.096654	high
CGGA_D37	2.64384	1	4.89524	0.813181	0.197273	2.57678	0.539861	2.65728	3.49126	4.20874	1.76189	0.75196	2.19025	4.31854	6.89057	0.281239	1.11444	0.977792	high
CGGA_747	2.65753	1	6.6104	2.33851	0.145766	0.307503	2.70723	2.25904	2.91661	3.83858	0.905223	1.04645	2.66731	6.34842	5.15294	0.756221	1.76603	0.178744	high
CGGA_P111	2.66027	0	6.16973	2.2643	1.39173	1.06649	4.56509	2.01976	2.20569	3.71386	1.89978	3.25867	1.92921	4.46634	5.74859	0.695661	3.87179	-0.698813	low
CGGA_P122	2.66027	0	6.36112	3.13051	1.428	0.295724	3.71465	1.96358	2.39872	3.28199	2.38735	3.20781	2.44855	4.46132	4.04898	0.5745	4.39146	-1.18797	low
CGGA_1731	2.66301	0	6.23602	3.75192	1.92077	0.777659	2.53964	1.20329	3.0494	3.82251	0.620809	1.79643	2.58398	4.68889	7.41065	1.08364	1.40044	-0.357588	low
CGGA_P108	2.67397	0	5.41751	1.55364	0.981166	2.01465	6.2268	3.03393	2.92042	3.13305	2.11523	1.4653	1.92623	4.68035	5.37279	1.04234	2.43172	0.0851638	high
CGGA_1675	2.68493	0	5.18911	2.99713	0.144012	0.459945	3.16932	2.7413	3.22214	4.03106	1.19882	2.39413	2.56962	5.23692	5.8074	1.00697	1.2668	0.318337	high
CGGA_P103	2.69315	0	5.16398	2.87889	2.18986	1.35578	4.65375	2.01609	2.04808	3.8882	1.77132	2.44187	2.67023	4.1621	5.23154	0.722203	3.17948	-0.828282	low
CGGA_P102	2.70959	0	5.48406	2.88402	0.144012	0.754483	2.47786	2.27018	3.49668	4.76846	2.06952	0.121229	1.50939	5.82528	7.15828	1.73067	1.17272	1.06637	high
CGGA_1058	2.72603	1	5.51192	1.20218	0.244633	0.983449	1.6071	1.72126	2.83632	3.51155	1.56093	2.90335	1.8236	4.48563	6.28211	1.73922	3.15913	8.4475e-05	high
CGGA_1142	2.75342	1	5.18437	0.618133	0.0846813	1.5943	0.173558	2.41729	3.20196	5.07519	1.67538	0.248446	2.47604	4.4701	7.24207	3.03137	1.44441	1.04066	high
CGGA_1819	2.76164	0	4.88824	3.53367	0.255363	3.01723	3.37461	2.0013	3.71498	4.10749	1.56093	1.22931	1.95284	4.2662	7.14267	2.43771	1.59124	0.461231	high
CGGA_882	2.76164	0	5.91248	1.42165	2.36808	2.26787	1.39053	1.8141	2.22759	3.46753	1.57278	1.80868	3.43862	3.94672	4.82573	0.668609	2.95953	-0.840746	low
CGGA_337	2.76164	1	6.9811	1.38715	2.55709	2.77567	3.088	1.06894	1.65923	3.33048	1.22406	2.12214	3.84329	3.92863	6.65241	1.05521	2.58799	-1.12301	low
CGGA_P93	2.76712	0	5.35695	2.32206	0.81553	0.640798	3.80144	2.05596	3.21784	4.1867	1.89978	2.13129	2.01007	4.33211	5.8344	0.484076	3.32598	-0.154811	low
CGGA_887	2.76986	0	5.64993	0.73707	2.71709	2.87851	0.777318	1.80982	2.59477	3.39413	0.942351	0.763594	3.76697	2.94831	5.23914	0.677684	2.00508	-0.643858	low
CGGA_883	2.78356	0	6.81117	1.74626	1.40999	1.18513	3.83651	1.97121	2.55692	3.81974	1.24371	1.97368	2.65681	4.37634	5.32413	0.839865	2.1443	-0.302682	low
CGGA_1164	2.8	1	5.93273	2.67399	1.86373	1.66403	3.13799	2.44434	2.51048	3.58878	1.4042	2.45226	3.49227	4.47384	6.324	0.544998	2.95308	-0.906096	low
CGGA_1353	2.8	1	4.36236	0.0824555	-0.0160446	1.55589	1.7743	2.58417	3.44122	4.60998	3.00041	0.134474	1.26343	4.33763	5.36874	2.27248	1.74957	1.44056	high
CGGA_727	2.80274	1	4.41137	0.576587	0.404395	2.99004	2.69421	2.31524	2.63098	4.25361	2.88873	0.835364	2.05581	4.01142	6.94865	1.4395	2.33774	0.647417	high
CGGA_P84	2.81096	0	5.363	3.21633	1.33542	0.623755	4.48927	2.33851	2.72333	4.35562	1.46255	3.02094	1.62799	4.03478	5.73676	0.668609	3.67044	-0.508277	low
CGGA_P86	2.81096	0	5.95662	3.37221	1.19408	0.121432	4.587	2.2331	2.12762	3.25523	0.905774	2.99995	2.4164	4.41852	6.02002	0.3423	3.60379	-1.12824	low
CGGA_J023	2.81644	1	6.5163	2.72453	0.263664	0.307503	3.4892	1.91776	2.85594	4.6463	0.960601	2.20415	1.92858	5.54503	4.71486	0.134634	1.59315	0.353226	high
CGGA_P83	2.82192	0	6.00967	2.794	0.863998	0.317367	2.41064	1.62156	2.89853	3.77936	0.686656	2.19472	2.06752	4.32795	6.91184	0.4526	2.37803	-0.29909	low
CGGA_P113	2.8274	0	5.24426	0.417892	2.77096	2.25237	1.64309	1.4539	2.93302	3.32854	1.68635	1.40177	3.10786	3.03382	3.65663	1.22552	2.73998	-0.526161	low
CGGA_1437	2.8411	1	5.55366	1.41172	3.38558	2.69057	1.47326	1.26242	2.70206	3.73178	1.15252	1.49603	3.63465	3.326	5.34289	1.07684	2.18907	-0.727264	low
CGGA_862	2.86575	0	5.79183	1.00937	2.2831	2.72038	1.80624	2.1982	2.31745	3.8616	0.877735	1.17956	4.01167	3.65229	4.49159	1.04234	2.03403	-0.585801	low
CGGA_1649	2.86849	0	7.90241	2.77748	1.40999	1.01599	2.50672	0.540256	1.08435	2.39864	0.350732	1.70754	3.75349	5.41123	7.07749	1.46219	0.532232	-0.915653	low
CGGA_757	2.86849	1	4.11043	2.7157	0.986419	0.920846	3.25794	2.55401	2.63394	4.14126	0.809383	1.85661	2.39419	3.98427	4.91204	0.789776	2.59655	-0.244572	low
CGGA_D47	2.87123	1	6.75102	2.58674	1.75634	0.480129	4.75226	1.26685	2.28593	3.25076	2.11203	3.05248	2.73903	4.5017	5.05413	1.06905	3.15719	-0.947779	low
CGGA_1508	2.87397	1	5.07065	0.14644	0.735655	1.09713	1.57484	1.40273	2.71061	3.4468	1.38422	1.67663	2.31036	3.64313	6.75345	0.46317	1.76448	0.245919	high
CGGA_1548	2.88767	1	4.85256	0.0824555	1.07157	2.58692	2.3373	1.97121	3.15158	4.53824	1.22143	0.514124	2.79562	4.35065	5.72747	2.75312	1.05585	0.855701	high
CGGA_288	2.89589	1	7.0249	1.32958	0.222914	2.0239	3.03627	0.817143	2.34323	3.46632	1.16812	2.34195	2.57143	4.25453	4.60386	0.925888	2.59553	-0.350708	low
CGGA_1610	2.89863	1	4.96123	1.58475	0.626624	2.19401	0.0669513	1.6067	1.25398	2.69593	0.309771	1.12144	3.94404	3.73748	7.42874	3.12542	0.447802	-0.374171	low
CGGA_1771	2.92603	1	6.31782	2.36009	1.92386	2.03002	3.50444	2.76686	2.36292	3.8616	1.64196	1.57967	3.34385	4.29494	5.27815	0.5549	2.8666	-0.756119	low
CGGA_1701	2.93699	0	6.35576	3.81847	2.74092	1.02879	3.56782	1.26884	2.7042	3.84175	0.598193	2.24351	3.54545	4.93033	6.89572	1.1819	2.10199	-0.970063	low
CGGA_491	2.94247	1	5.25771	2.4326	0.793235	1.23727	2.07097	1.86947	4.0529	4.29191	0.682149	2.13558	2.09911	4.46382	5.36881	0.632498	1.97384	0.315259	high
CGGA_1614	2.95616	1	5.12316	2.21795	1.51043	1.24623	1.98031	1.3911	3.54875	4.43661	1.05535	1.11483	2.80916	3.96135	6.9882	1.06314	1.98827	0.0209935	high
CGGA_1311	2.9589	1	4.77804	3.45249	0.779809	0.544309	2.71616	1.05431	2.52533	4.05909	1.51869	1.24148	1.66152	4.52639	2.74378	0.86385	3.46487	-0.390832	low
CGGA_1072	2.9863	1	5.27116	1.60646	0.534605	3.00672	2.36713	1.6615	3.11323	4.95776	2.39476	0.810837	1.68558	4.34561	6.48431	2.96574	0.986123	1.14319	high
CGGA_28	3.02192	1	5.40324	1.71863	0.610301	0.84491	2.24557	0.506919	1.61018	3.23661	1.09662	1.22319	2.10702	3.12439	5.76494	1.16919	2.66564	-0.568002	low
CGGA_1340	3.03836	1	4.97929	2.60581	1.35361	3.85004	3.00428	2.32105	2.86395	4.50028	1.44776	3.19072	2.94183	4.8833	6.48766	0.632498	2.27103	-0.0424854	high
CGGA_1282	3.05753	1	4.18773	0.554571	-0.055848	1.04777	1.13371	2.6293	3.84992	4.16272	1.82704	0.0248904	2.94255	4.41071	7.82817	2.74059	1.89662	0.79094	high
CGGA_1091	3.05753	1	3.77384	1.64124	0.145766	1.45459	2.67315	2.01395	2.9244	4.68506	2.03432	0.0222109	2.81913	5.79982	7.78338	2.10982	1.51279	0.867208	high
CGGA_1020	3.06849	1	6.60294	2.01355	0.374089	0.176561	3.56487	2.37248	2.27901	4.72756	0.568292	1.89649	2.0412	4.22702	3.12223	0.497657	2.24737	-0.0260376	high
CGGA_330	3.07123	1	2.99523	0.0434585	0.327618	2.91285	0.793898	2.85548	3.1627	3.97815	2.60814	0.437313	1.94392	3.7588	3.23125	2.00278	2.35798	0.909922	high
CGGA_1708	3.07397	1	4.79795	2.68786	0.072495	1.56882	0.533035	2.65015	4.35424	4.35255	1.0637	0.0807363	2.1403	3.9695	6.95863	3.83247	1.03129	0.895197	high
CGGA_1338	3.07397	1	3.81564	1.62973	0.197273	1.99565	2.66518	1.79635	4.2226	3.73036	1.86653	0.0911204	1.46173	4.65717	7.92678	0.497657	1.27527	1.10616	high
CGGA_1780	3.07671	0	1.13915	0.0290345	-0.00303408	0.170131	0.12128	0.594049	0.709796	2.11919	1.44335	0.0248904	1.85873	2.91727	1.95265	0.132402	0.892624	0.282494	high
CGGA_1786	3.09041	0	7.48232	2.48435	1.96652	0.338671	4.29541	1.26242	2.45451	3.34724	0.44212	2.91462	2.60522	4.6566	6.55087	0.184672	2.56762	-0.907333	low
CGGA_884	3.09863	1	6.40302	2.53147	1.27338	0.789992	4.23865	2.96871	2.25811	4.41201	1.37724	2.47171	1.92858	3.97644	3.59013	0.789776	2.9044	-0.373202	low
CGGA_1591	3.10411	1	6.54987	2.41404	1.68761	2.2781	4.31362	1.99757	2.90586	3.68446	2.03968	2.56184	2.04048	4.13438	5.7025	1.66482	3.23531	-0.460891	low
CGGA_601	3.10411	1	5.99002	2.04959	2.25764	2.12736	2.52898	1.12784	2.07585	2.99885	1.31805	2.02811	4.17682	3.42825	5.07639	1.20714	2.9236	-1.36456	low
CGGA_J73	3.10685	1	6.50215	2.37006	1.80754	1.43844	4.38043	2.65015	2.47259	3.8607	1.32961	1.56526	3.54713	4.21213	5.03777	0.5745	2.25019	-0.687223	low
CGGA_1670	3.12603	0	5.15689	2.25624	0.200838	3.15256	4.66632	1.68414	3.35001	3.58988	1.35717	2.97327	1.96159	4.89608	6.39547	1.11052	1.8739	0.353489	high
CGGA_1769	3.15342	0	5.6018	0.365588	2.33427	2.2367	1.43251	0.895302	2.23994	3.42948	1.48776	1.4653	2.63985	3.77136	5.12724	0.887435	3.32929	-0.583614	low
CGGA_1611	3.1726	1	6.51191	3.19196	0.387587	0.338671	3.03139	2.77527	3.50589	5.40187	1.81205	2.96967	2.37924	4.17847	7.17382	1.81394	2.66827	0.0855167	high
CGGA_1036	3.19452	1	5.57819	2.22072	0.328169	1.15061	2.56498	2.05953	4.17048	3.7377	1.81706	2.16018	1.82683	4.56422	6.18016	4.01884	1.16522	0.791669	high
CGGA_808	3.19726	0	4.35683	0.822722	0.197273	2.88927	1.89478	1.34518	2.88516	3.48757	1.18706	1.60593	1.79401	3.78648	6.24912	0.96939	2.08222	0.417685	high
CGGA_1135	3.21096	1	6.17882	0.121202	0.0226159	3.18832	0.970557	1.90895	3.88796	4.69754	1.51869	0.27258	3.01585	4.63298	7.18383	2.14091	1.38117	0.978785	high
CGGA_1497	3.2274	1	5.50507	2.57283	-0.00303408	1.25705	4.27697	2.63861	3.99965	4.60897	1.83695	2.50811	0.879505	4.97584	5.33407	0.376305	1.8739	0.931315	high
CGGA_103	3.25479	1	6.17233	2.16134	2.23728	1.16798	4.38657	2.76896	2.48788	4.08276	1.35033	1.82486	2.71609	5.06009	6.1604	0.44195	3.21216	-0.590244	low
CGGA_1477	3.27123	1	5.34225	0.831422	0.765251	0.657631	1.63418	0.903714	3.06243	3.86874	0.454727	1.74631	2.70316	3.39122	6.95314	0.831778	2.46541	-0.172955	low
CGGA_694	3.27123	1	4.04087	1.47212	0.82892	1.54351	2.33465	1.76061	2.80454	3.36649	1.34426	1.44918	2.75527	4.01623	5.93748	1.21966	2.02525	-0.00575803	high
CGGA_P21	3.27397	0	5.64884	3.14896	0.167031	0.380306	2.53732	1.81836	3.28085	4.52912	0.609544	2.17284	2.29031	4.64237	6.43238	0.544998	1.76448	0.149305	high
CGGA_P20	3.27671	0	6.353	2.97971	0.870782	1.06649	3.36055	2.40355	2.7891	3.85442	1.56093	2.77928	2.58398	4.21515	4.5926	0.902942	3.51366	-0.721441	low
CGGA_1139	3.27671	1	5.74994	0.401259	0.719595	4.99243	0.570188	1.22357	2.71233	4.13765	1.71484	0.36092	4.26597	4.07004	3.98782	2.46131	1.02682	0.313974	high
CGGA_P19	3.27945	0	5.31604	2.57711	1.48922	0.852182	3.61674	2.37001	2.41222	3.68958	2.12339	2.58089	2.12249	4.24572	6.64786	0.871756	3.531	-0.589643	low
CGGA_1227	3.27945	1	3.65366	0.508719	0.21411	3.32771	2.53478	3.46265	2.98579	4.09619	2.62401	0.130965	3.14214	4.44083	6.71372	2.14723	2.85954	0.455245	high
CGGA_P17	3.29589	0	5.47203	2.20682	1.39632	0.730908	3.64632	2.01976	2.55211	3.40052	2.42434	2.30511	2.1801	4.083	5.7307	0.544998	3.89201	-0.699052	low
CGGA_1696	3.30137	0	1.11555	0.108408	-0.055848	0.121432	0.0669513	0.886838	0.489697	1.25428	1.46255	0.0530871	1.2226	2.09182	1.93701	0.902942	0.769125	0.177081	high
CGGA_P31	3.30137	0	5.50507	0.0692935	2.54705	3.43188	0.419684	1.4427	2.44669	3.48197	0.540094	0.983088	2.86763	3.53924	5.88337	0.790635	1.71928	-0.141416	low
CGGA_D21	3.30959	1	5.41224	1.28322	1.04979	0.601717	2.9739	1.08088	2.95786	3.35216	0.894904	1.44918	2.11337	4.51176	3.24831	2.95793	1.69806	0.185164	high
CGGA_1655	3.31233	0	5.71095	2.58774	0.77255	1.08496	1.90889	1.08399	3.40699	3.81232	0.739378	2.19162	2.83287	4.57872	6.80449	0.8559	1.62434	-0.056796	low
CGGA_P13	3.31781	0	6.089	2.75139	1.64259	1.68781	4.20344	1.95591	2.63832	3.34326	1.70805	2.57378	2.51994	4.32169	5.42497	0.76536	3.69113	-0.904997	low
CGGA_1533	3.33425	1	5.46395	1.10605	0.462939	3.66912	1.43767	1.62156	3.20776	4.11563	1.12083	1.01185	2.24689	3.74389	6.571	2.74895	1.3014	0.646577	high
CGGA_1745	3.35616	0	1.42393	0.133879	0.481137	0.580191	1.10782	1.18979	0.45317	1.4086	0.643085	0.420207	2.4934	2.25478	1.3187	0.105522	0.972271	-0.352479	low
CGGA_1524	3.3589	0	6.86865	1.53098	1.36855	1.02879	3.7645	1.57647	3.25741	3.6428	1.22143	2.22237	2.99145	4.51254	5.20497	0.695661	2.94877	-0.510175	low
CGGA_1743	3.37534	0	6.10648	1.04886	3.04881	2.34765	2.6893	1.42571	2.95258	3.8882	1.16034	1.8168	3.40249	3.77449	6.11324	1.02122	2.17059	-0.494576	low
CGGA_1744	3.37534	0	6.37732	0.121202	-0.0160446	1.82239	0.186325	1.08399	2.17697	3.88468	1.602	0.134474	2.77582	4.65169	6.86737	2.89721	0.910711	0.653377	high
CGGA_1737	3.41918	0	7.5359	3.73362	1.76294	1.09713	2.52092	1.48151	2.29704	3.57213	0.540094	2.41555	2.97185	4.80451	6.54019	0.584198	1.61339	-0.791268	low
CGGA_809	3.43014	1	6.19169	3.04051	1.61951	0.370016	3.38727	2.2331	3.63559	3.66692	1.11281	2.30224	2.8314	4.39891	5.93999	1.50813	2.60105	-0.524195	low
CGGA_720	3.44658	1	6.01623	3.32467	1.22564	1.30471	3.23838	2.02343	3.18588	4.30106	1.00427	2.33353	2.84892	5.40026	6.78953	0.902942	1.81309	-0.100584	low
CGGA_759	3.46027	1	3.80674	1.78911	0.744489	0.542033	2.62472	2.28589	2.94505	4.29525	1.42699	1.53217	2.92684	4.91803	5.3407	2.01015	1.67254	0.374917	high
CGGA_1113	3.46575	1	6.59296	3.11393	1.04979	0.0178679	4.56824	2.27996	1.62227	2.8792	0.758777	2.89188	2.32385	5.20748	4.98513	0.901642	1.37735	-0.531357	low
CGGA_1727	3.49589	0	5.6508	2.56639	1.1453	0.606496	2.17784	1.00855	2.91316	3.87851	0.718514	1.33527	2.94389	4.28567	6.91405	1.59102	2.23604	-0.387158	low
CGGA_1723	3.51233	0	7.44433	3.88111	2.264	1.45718	4.00613	1.74844	2.82468	3.33123	0.643085	2.19472	3.16232	4.84112	6.06118	0.773835	1.90112	-0.933339	low
CGGA_1725	3.51233	0	6.80058	3.70382	1.18874	0.32806	4.40604	2.34429	2.66508	4.31507	1.00427	2.41555	2.53486	4.81085	4.03435	0.677684	1.49305	-0.259225	low
CGGA_1650	3.51507	1	6.02389	1.2309	1.19408	0.674258	4.00452	1.25598	2.96137	3.41193	1.65876	2.47282	1.93219	4.00782	5.76476	0.494414	2.88477	-0.242096	low
CGGA_1720	3.53425	0	6.12056	2.45432	0.577051	0.606496	3.52627	2.48133	2.73801	3.90995	1.58454	2.99111	2.06216	4.55897	5.4339	1.23773	3.71406	-0.461114	low
CGGA_1721	3.53425	0	6.01901	3.9114	3.63144	1.40016	3.19852	1.10582	2.89114	2.94711	0.516202	1.8168	3.80934	5.09522	6.54317	1.838	1.66732	-1.12593	low
CGGA_856	3.55342	0	6.36667	3.15718	1.60471	0.949637	3.78552	1.08682	2.0259	3.02235	0.594438	2.65397	3.75715	4.5246	6.69447	1.58798	2.31929	-1.19832	low
CGGA_251	3.5589	0	6.46844	1.73049	2.22095	1.49622	2.48184	0.775758	1.98671	2.91317	1.6719	2.76692	3.24932	3.73065	5.89721	1.56341	3.51262	-1.27423	low
CGGA_279	3.6	1	6.01033	3.31845	0.85718	0.830249	3.56339	1.61167	2.92223	4.44639	0.896486	0.319655	2.51806	4.53357	8.25901	0.823645	1.23851	0.084248	high
CGGA_400	3.61918	1	6.12744	1.24704	1.06013	1.38281	2.16139	1.67421	2.64866	4.02085	1.66899	1.79889	2.20396	3.93569	6.59168	0.878362	2.16025	0.0557578	high
CGGA_1033	3.62192	0	5.93081	1.02926	4.06358	2.21552	1.0271	0.886838	3.21641	4.15559	0.586754	0.997543	4.49257	3.35616	5.84432	1.47253	1.49305	-0.666096	low
CGGA_1714	3.64384	0	6.14973	2.229	2.2949	2.00535	2.82057	1.20999	2.21512	3.39157	0.390591	1.65866	3.09118	4.45565	6.43832	1.6284	1.81309	-0.631863	low
CGGA_1716	3.64932	0	5.16044	1.8943	1.03614	1.98654	1.35273	2.65245	3.59451	4.27126	3.0513	1.75479	2.30371	4.3154	5.2321	1.36001	2.39403	0.398616	high
CGGA_1607	3.65205	1	6.08032	2.65596	1.236	0.121432	4.53405	1.36751	2.45191	3.03415	1.13676	2.30224	2.57323	4.1707	4.1616	1.33752	1.56305	-0.47205	low
CGGA_1441	3.67123	1	5.2884	0.0824555	0.167031	2.47694	0.134536	1.25598	3.29174	3.55073	0.951356	0.353968	2.13524	4.57872	7.41564	2.02742	1.29455	0.836473	high
CGGA_621	3.69041	0	6.74957	3.17961	0.0352599	0.240066	4.47152	1.96358	2.52287	4.38718	0.770133	1.92203	2.17273	4.75934	7.06122	0.158779	1.47501	0.0274318	high
CGGA_1109	3.69315	1	5.22462	0.073974	0.197273	3.48225	0.261606	4.37998	2.83444	5.26448	2.4994	0.130965	2.0265	4.16315	5.53464	1.79274	1.81062	1.2255	high
CGGA_703	3.71233	1	4.66829	1.28659	0.41634	2.43443	0.948742	1.92084	2.96661	3.66899	1.81205	1.27146	1.88986	4.68196	6.70164	2.99332	1.54587	0.718784	high
CGGA_1704	3.72603	0	5.47906	2.36009	1.93925	0.762252	1.98726	1.33135	2.46745	4.32517	0.516202	1.56042	3.08397	4.375	7.42287	1.43601	2.16686	-0.436045	low
CGGA_1408	3.73151	1	2.76032	0.0123561	0.562265	3.73267	2.24345	3.839	3.69466	3.64704	1.62455	0.008032	2.93185	3.77546	6.70256	1.94625	2.21226	0.682167	high
CGGA_1706	3.73699	0	5.56118	0.854032	0.42579	1.1908	1.10782	1.51391	2.92943	2.90133	1.21393	0.342622	2.21393	5.60548	7.04461	2.93059	0.817896	0.695146	high
CGGA_1703	3.74247	0	5.14325	2.02475	1.02411	1.37074	2.07774	1.07663	3.44363	3.4468	0.416579	1.85668	3.03103	4.66961	6.24229	1.33752	2.1443	-0.211917	low
CGGA_1389	3.75342	1	6.90476	3.17824	2.32741	1.66802	3.01004	1.09858	2.62927	3.71085	0.516201	2.27318	2.96921	4.65224	5.27515	1.13035	2.09416	-0.768833	low
CGGA_1700	3.7589	0	5.97264	2.38733	1.97846	2.03916	3.25928	1.36751	2.62245	3.68958	0.643085	1.49095	3.97441	4.41462	6.53462	1.41471	1.52264	-0.599216	low
CGGA_1155	3.76164	1	6.21231	3.88277	1.74891	1.18513	3.00506	1.10582	1.89277	3.0223	0.44212	2.08849	3.37206	3.95497	6.48879	1.31467	1.56873	-1.09509	low
CGGA_267	3.76438	1	5.88997	2.31599	0.875391	0.670624	2.66251	1.691	2.18337	3.85814	0.787126	2.45298	2.61633	3.62528	6.38313	1.09635	2.96523	-0.689314	low
CGGA_1097	3.77534	1	5.21405	0.288852	0.499092	4.1176	2.86721	2.61048	3.21928	4.42792	1.89504	0.248446	2.44657	4.0122	6.56195	2.32129	1.82735	0.805166	high
CGGA_1699	3.79178	0	2.02186	0.626978	0.377864	0.145999	1.08808	0.826054	0.668691	1.3969	1.14466	0.308032	2.53486	3.12944	1.85573	0.184672	1.072	-0.33625	low
CGGA_607	3.80548	0	4.62726	2.53808	0.863888	0.307503	3.80766	1.91042	1.62227	3.82449	0.770188	2.32063	2.43168	3.74984	6.12904	0.789776	3.27739	-0.78176	low
CGGA_580	3.81918	1	6.55517	3.24887	1.37095	0.968558	3.9284	2.33549	2.82632	3.97815	0.758777	2.01365	1.98932	4.30079	5.70543	0.947146	2.37198	-0.378033	low
CGGA_P3	3.83288	0	1.8522	0.243	-0.00303408	-0.00851789	1.06805	0.425777	0.402793	1.26731	0.896486	0.342622	0.886274	3.48351	2.83724	0.078121	0.447802	0.325172	high
CGGA_1569	3.85205	0	6.15955	2.90774	1.48922	1.2995	2.11613	0.665931	2.47259	3.00692	0.504109	1.97005	3.10431	4.72509	6.93197	0.999786	2.45325	-0.882525	low
CGGA_1630	3.85479	0	6.33077	1.91864	2.65559	2.11592	2.83002	0.724638	1.86015	3.06082	0.790287	1.77992	3.97861	4.39561	6.35075	1.03533	1.51677	-0.929172	low
CGGA_J042	3.86027	1	5.39951	1.42036	0.668714	2.45421	2.82706	1.32464	3.76504	3.53891	1.42699	1.26764	1.8898	4.07375	5.18298	0.998547	2.36199	0.281003	high
CGGA_1687	3.87397	0	4.43881	0.0824555	0.0846813	1.00954	1.09469	2.30031	3.09284	3.77936	2.59364	0.0669788	2.04865	4.53178	4.76073	1.3089	1.36164	1.02253	high
CGGA_1689	3.87397	0	5.88683	2.40438	0.779809	0.317367	2.95259	2.27626	2.92943	4.45837	1.03852	2.32223	2.20436	3.95131	6.63807	1.18822	2.71224	-0.17547	low
CGGA_1565	3.88219	0	5.07031	1.5264	0.211921	1.81167	1.91985	1.33745	3.59772	4.03578	0.728983	1.82486	2.00727	3.89617	6.7106	0.97802	2.61747	0.214675	high
CGGA_1620	3.90959	0	5.82271	1.82596	2.97286	2.26014	3.03139	1.85616	2.71698	3.90303	0.942351	1.20466	4.00875	3.81155	5.80597	1.1499	2.29863	-0.812459	low
CGGA_1300	3.91233	1	5.65864	1.85875	0.435174	1.3953	2.78404	1.38524	3.58699	4.39018	1.71879	2.43664	1.85242	4.45691	5.77524	0.992568	2.57605	0.332674	high
CGGA_1679	3.95068	0	6.04181	1.60655	3.57904	1.97386	1.63864	0.313727	1.44439	3.2764	0.429405	1.4549	5.30333	4.22192	6.43822	1.38215	1.29455	-1.32179	low
CGGA_903	3.9863	1	4.26601	2.39466	0.358205	0.430623	3.19852	2.60335	2.98223	4.43314	1.71879	2.34195	1.73995	4.84587	2.50572	0.86385	3.8176	-0.0149127	high
CGGA_1673	3.99178	0	5.96958	2.73245	1.70229	2.11878	3.05722	2.47349	2.52779	4.04515	1.11281	2.77516	3.16571	3.48351	4.76525	0.730941	2.45325	-0.70596	low
CGGA_1671	4.01096	0	5.93134	2.71517	2.04515	0.698825	2.88906	1.98257	3.66834	4.34328	0.858744	1.8168	2.65005	5.0157	5.70522	0.524981	1.66732	0.0117244	high
CGGA_1667	4.04384	0	5.69333	2.11432	1.7699	0.762252	2.87271	1.83529	2.03733	3.2438	1.96007	2.96426	2.3517	4.08549	4.94959	0.473662	4.00354	-1.00774	low
CGGA_1664	4.08493	0	6.08977	1.9594	2.93688	2.34523	2.52328	1.4427	2.7951	4.31824	0.697352	1.7249	3.40061	3.7797	5.70696	1.3089	2.18171	-0.591775	low
CGGA_1662	4.09041	0	6.52148	4.13298	2.49541	1.32023	3.79206	1.76183	2.88744	4.4578	0.810171	1.86061	3.51656	4.64567	6.59471	0.831778	2.36185	-0.896933	low
CGGA_1318	4.10137	0	4.82471	3.46598	0.690004	1.29426	2.20178	2.5696	2.92764	4.53181	1.78673	2.12152	2.27676	3.75875	7.30566	0.622339	1.79868	0.0819129	high
CGGA_1661	4.12329	0	6.08931	2.74385	1.33062	0.74667	2.65123	0.518123	2.15746	3.58215	0.403642	1.74206	3.41372	4.5578	7.23679	1.52311	1.21691	-0.52708	low
CGGA_1658	4.12877	0	5.51922	0.961822	0.368071	1.81883	0.777318	1.16928	3.22071	3.22792	1.1912	1.47561	1.77407	3.73425	5.79665	0.78226	1.75953	0.341306	high
CGGA_705	4.12877	1	5.76817	2.35005	0.297447	0.48865	2.73647	3.11781	3.22643	4.01124	1.24371	2.18539	2.07019	4.69842	6.67025	0.739624	2.61747	0.0562794	high
CGGA_1657	4.13973	0	5.73734	1.82227	1.73829	3.63092	3.77311	0.953111	2.24301	4.2354	0.586754	1.88396	3.73552	4.41527	7.01926	0.773835	1.08	-0.212008	low
CGGA_1579	4.14247	0	6.16639	0.526404	3.6139	2.45249	1.86042	1.16928	2.96661	3.43569	0.551898	0.82172	4.52611	3.73962	6.72567	0.948466	0.937419	-0.55481	low
CGGA_1653	4.14521	0	6.5325	2.45432	2.96574	0.88797	3.45131	1.69352	1.91275	4.1684	0.44212	1.36891	3.65717	4.06037	7.25745	1.38763	1.32849	-0.750722	low
CGGA_1648	4.16712	0	5.50777	0.322265	2.75268	1.73036	1.48326	0.389451	0.709796	3.03919	0.540094	2.11169	3.78937	3.68723	7.01669	2.41677	1.15768	-0.760159	low
CGGA_1647	4.17808	0	6.8202	2.41644	1.74538	0.880887	1.51284	0.364678	0.957392	2.33128	0.575226	1.68996	4.46549	4.2662	6.72875	2.3128	0.846379	-1.22757	low
CGGA_112	4.20274	1	6.24315	2.36757	0.735655	0.13377	3.93754	2.98637	2.78106	3.96985	1.18355	2.07505	2.1801	4.79521	5.08664	0.409509	2.15563	-0.0555513	low
CGGA_1645	4.20274	0	6.85568	2.74951	1.38251	0.526007	4.8459	1.95206	2.74632	3.64597	1.36398	2.19782	2.01844	5.08811	5.3886	0.44195	2.78425	-0.43716	low
CGGA_1057	4.24384	1	5.53416	1.32428	0.328169	2.4681	0.826213	1.34351	3.29309	3.96489	1.04696	1.40717	2.13524	4.39297	6.05928	1.60983	1.59124	0.538379	high
CGGA_426	4.27397	1	3.58167	-0.0354485	0.197273	2.03081	-0.0612693	1.55636	1.45793	4.31189	2.39816	-0.0353457	1.52661	4.31773	5.44275	3.42089	1.50197	1.06643	high
CGGA_1642	4.27945	0	6.01607	1.91864	0.287049	0.516763	2.55582	1.85201	3.27263	3.30957	0.598193	0.900846	3.36917	4.69684	7.36618	1.50813	1.08	0.0231156	high
CGGA_1640	4.28219	0	6.40009	2.81751	2.25435	2.21819	2.46565	0.961171	2.4493	3.61823	0.491917	1.62666	3.92672	4.26475	7.13522	1.10385	1.13482	-0.703534	low
CGGA_1026	4.30137	1	3.46888	0.784214	0.263664	1.06895	-0.15345	3.66306	2.64279	4.83715	2.04318	0.0639437	2.0117	4.01527	6.25568	3.19637	1.36547	1.12338	high
CGGA_1580	4.33151	1	5.35888	2.49572	1.39632	0.498086	3.06996	2.09815	3.08172	3.93136	1.66986	2.45485	2.11735	4.26184	6.27402	1.02829	3.56646	-0.450296	low
CGGA_1592	4.35068	1	6.51003	2.97172	0.936804	0.86661	4.06763	2.41181	2.10051	3.67417	1.08025	2.27024	1.9112	4.80549	5.11364	0.46317	3.21932	-0.62194	low
CGGA_1627	4.37534	0	5.78674	2.64381	2.52346	1.65601	3.11056	2.03798	3.06404	4.28689	0.739378	1.82888	3.47019	4.34038	5.97558	1.12377	2.34877	-0.598517	low
CGGA_1623	4.39178	0	4.78239	0.0692935	0.974917	4.00676	1.06131	2.46032	2.36571	4.15344	1.51256	0.473145	2.21155	3.25291	5.73449	0.79896	2.0422	0.433628	high
CGGA_1583	4.4	1	5.03807	0.468279	2.65918	2.36211	0.331	1.72126	2.52779	4.53931	1.08846	1.38543	4.14442	2.95215	5.7343	1.34881	2.27807	-0.479473	low
CGGA_1621	4.40274	0	5.77155	2.54469	0.735655	0.338671	3.42458	1.80553	2.99082	3.96985	0.88714	2.29647	2.66689	4.46069	5.5581	0.622339	1.96268	-0.174325	low
CGGA_1055	4.4137	1	5.96533	2.84767	0.211921	0.956845	2.76244	2.23935	3.41194	4.43545	1.76096	2.157	1.78079	4.90109	4.64428	0.686701	2.88702	0.15166	high
CGGA_1617	4.4137	0	6.79882	1.92894	3.07408	1.25705	2.90164	1.11302	2.35452	3.9356	0.390591	1.90312	4.14966	4.34861	6.514	1.05624	1.50496	-0.843536	low
CGGA_1618	4.42466	0	6.07033	1.76566	1.66153	1.25705	2.87636	1.20329	2.9366	4.10377	0.44212	2.05808	3.6679	4.23461	6.66343	1.39309	2.25721	-0.530023	low
CGGA_1608	4.46301	0	5.78025	1.85515	2.264	1.92191	4.40664	2.10506	3.55979	4.11784	1.5962	1.98091	3.34286	4.29991	6.84881	2.97923	1.43821	0.0250433	high
CGGA_1463	4.46575	0	6.26751	2.345	1.72759	0.88797	4.50904	1.41427	2.10393	3.08047	1.65318	3.14874	2.15786	4.44233	4.64247	0.6129	3.94993	-1.0516	low
CGGA_591	4.53151	1	4.99148	1.1798	1.17001	0.861727	0.508942	0.61979	3.45275	2.66208	1.42699	2.96396	2.52881	3.77103	6.68511	0.30434	2.79848	-0.404474	low
CGGA_1595	4.54521	0	6.07845	2.49572	0.297447	0.273733	3.05402	1.18299	2.74217	3.77459	0.491917	1.57488	2.74	5.50588	7.03548	0.773835	1.38762	0.0280735	high
CGGA_898	4.55616	1	5.22462	1.29747	1.95233	3.59088	3.37949	0.665809	1.76657	3.75688	0.44391	1.54722	3.57848	3.62649	5.53087	0.822597	3.24717	-0.986129	low
CGGA_1588	4.6	0	4.62472	1.02926	1.20995	1.06028	1.42733	0.401668	1.77035	2.48849	0.978048	1.10819	3.83904	4.25819	7.82422	2.2578	0.708313	-0.32146	low
CGGA_1401	4.60274	1	5.54822	2.46826	0.666584	0.895016	3.45131	2.05596	2.42559	3.95742	1.2289	1.53106	2.43659	4.2435	6.49179	0.925888	3.82346	-0.645828	low
CGGA_362	4.60274	0	5.61378	0.417892	1.45458	1.56022	0.610011	1.33745	2.82272	3.19109	2.48614	2.98043	2.39382	4.31119	4.62147	0.910632	3.12329	-0.195411	low
CGGA_1525	4.61918	1	5.99462	1.45585	2.11139	2.05126	2.02484	0.551187	1.6594	3.11259	0.209547	1.25954	4.39927	4.3168	7.06351	2.12802	1.6352	-0.939476	low
CGGA_J50	4.63836	1	6.41234	2.2643	2.35915	1.09106	3.75099	2.76896	2.94904	4.17758	1.494	2.06829	2.87759	4.38568	5.39432	0.36506	2.55061	-0.472426	low
CGGA_1527	4.69589	1	6.22969	2.31433	0.936804	1.38062	4.12504	1.80982	3.00952	4.47193	1.4815	2.34753	3.10074	4.23758	6.7426	0.695661	2.54776	-0.30784	low
CGGA_1566	4.70137	0	7.02989	2.52709	1.12304	0.158118	4.14196	1.03162	2.396	3.3123	0.350732	1.68553	2.4702	5.36293	7.15573	0.271729	1.25273	-0.276962	low
CGGA_1563	4.70959	0	4.48861	1.11844	0.577051	2.67733	0.107896	2.42817	3.65412	4.23473	2.27416	2.08179	2.47409	4.52339	6.28406	2.32974	1.45058	0.871514	high
CGGA_1562	4.71507	0	6.15326	2.70936	2.31357	1.98654	3.61994	1.99757	3.10856	3.71185	0.790288	2.46515	3.53363	4.13438	6.58679	1.41471	3.27708	-1.03413	low
CGGA_1557	4.72055	0	7.30302	3.29711	1.83427	1.41944	3.93159	1.12731	2.28226	3.62789	0.563608	2.17913	3.01966	4.8883	6.2258	0.871756	1.24564	-0.596371	low
CGGA_1013	4.72603	1	6.54092	2.72453	1.34488	0.402672	3.16945	1.55183	2.90356	3.50095	0.764495	2.51105	1.57187	3.89806	4.84904	1.1031	2.84811	-0.50077	low
CGGA_1552	4.73425	0	6.58392	3.14472	1.49349	0.64924	3.92477	1.60171	3.225	3.29861	0.620809	1.9881	3.09836	4.37299	6.76612	0.902942	2.39403	-0.790326	low
CGGA_1539	4.81644	0	4.55382	2.08714	0.89758	0.698825	3.57334	2.74774	2.3261	3.87674	2.47976	2.84168	2.37504	4.14395	5.62817	1.32614	3.22111	-0.297993	low
CGGA_1169	4.83562	1	6.28521	2.7113	0.99974	0.769977	3.22144	1.91293	2.42293	3.4639	1.37751	2.02701	2.40824	3.77866	5.96147	1.0493	3.41124	-0.832636	low
CGGA_333	4.88493	0	5.18505	1.1798	1.81748	1.86913	2.64643	1.20152	2.1284	2.7688	1.95893	2.71829	2.96167	3.36044	5.46118	1.50788	3.04758	-0.830879	low
CGGA_1528	4.91233	0	6.37067	3.42969	1.98735	1.17944	3.50212	1.32523	2.97704	3.09341	0.44212	2.0305	2.96392	4.50951	6.44777	0.992568	2.15186	-0.850658	low
CGGA_1530	4.91233	0	6.10297	3.5122	1.36855	2.03612	2.2077	0.928638	1.12159	3.39413	1.50021	0.877566	4.28079	4.27417	6.33294	2.82996	1.91008	-1.12615	low
CGGA_1526	4.92603	0	6.06578	1.21374	1.69497	1.98969	3.62844	1.14846	2.51048	3.21771	2.10702	2.94057	2.12505	4.58734	5.67047	0.933454	4.00354	-0.636755	low
CGGA_1523	4.94247	0	5.1723	1.13682	1.523	1.91528	2.08098	2.32979	3.00105	4.23405	2.47655	2.19782	2.33011	4.19464	5.92042	0.79896	3.21754	-0.00493776	high
CGGA_633	4.96438	1	4.224	0.147835	1.26423	4.06108	3.32778	3.13752	0.915129	3.68687	1.80736	2.39531	2.68961	3.08673	3.05927	0.233944	2.34587	-0.210414	low
CGGA_1516	5.00274	0	6.39537	3.2547	2.27597	0.929711	4.30714	2.5696	2.52533	3.67003	1.05535	2.95883	3.00049	4.07132	6.32577	0.622339	2.88025	-1.04562	low
CGGA_1517	5.00274	0	6.79636	3.54429	1.45458	0.769977	4.56778	1.56625	2.69776	2.92167	0.609544	2.4182	2.95861	4.77888	5.92709	0.78226	2.16686	-0.912117	low
CGGA_1513	5.00548	0	6.64768	2.46131	2.4417	0.754483	3.95605	1.5967	2.44407	4.13103	0.739378	2.22237	3.34089	4.56014	5.45322	0.420406	2.88025	-0.943656	low
CGGA_761	5.0411	1	2.18598	0.554279	0.492274	0.321436	2.37994	3.02555	0.256495	3.69594	1.8964	1.67158	1.82638	4.42357	3.13111	0.315758	2.61013	0.0908526	high
CGGA_698	5.07123	1	5.91486	2.1321	1.08063	0.911138	3.67693	2.23482	2.66621	4.13644	1.16605	2.24194	2.44405	4.04004	6.34881	0.713195	3.07485	-0.431874	low
CGGA_1504	5.07945	0	5.87938	2.5835	0.822561	1.20207	2.20178	1.77948	2.71698	3.96572	0.924175	1.85275	3.04104	4.15266	7.06142	0.564734	1.24564	-0.125475	low
CGGA_1502	5.09863	0	5.51776	1.60655	1.73829	1.00307	2.43341	1.06923	2.41491	3.69467	0.516202	1.52114	2.37083	3.92448	5.81079	1.60046	1.56305	-0.137975	low
CGGA_799	5.11781	1	7.41211	4.25742	3.01344	1.60269	4.09588	2.35292	2.42026	4.00724	0.960307	2.66359	3.1348	4.37901	4.40983	1.16279	1.92783	-1.02172	low
CGGA_1488	5.15616	0	5.78557	1.45585	1.03614	0.657631	4.22012	1.72583	2.3685	2.6448	2.04398	2.21015	2.66018	4.20986	5.21875	0.524981	3.57484	-0.823296	low
CGGA_1482	5.1726	0	6.96656	3.01434	1.34972	0.410718	2.56041	0.506919	1.8053	3.21478	0.429405	2.04091	2.40619	5.27541	7.02102	1.88106	1.62434	-0.552701	low
CGGA_1273	5.23836	0	6.6451	3.19878	2.2949	1.95137	5.05528	2.38689	2.23687	3.44926	1.62497	0.975804	3.26576	4.1977	5.71486	0.948466	2.11365	-0.861224	low
CGGA_1471	5.25753	0	5.18057	2.09018	0.132353	0.571308	3.11056	2.03436	2.6473	4.1888	1.1912	1.66318	2.5441	3.91229	5.4339	1.14341	2.1964	-0.0169061	high
CGGA_1469	5.26575	0	1.17752	0.933894	0.499092	0.562368	0.610011	1.13439	0.477636	1.60808	0.933291	0.694123	2.45449	3.0588	1.02165	0.171785	1.31501	-0.381479	low
CGGA_135	5.27123	1	4.91513	0.947929	0.338256	1.22984	2.41827	1.99384	2.76687	3.52088	2.61716	0.534179	1.26343	4.86422	6.14878	0.668609	1.92783	0.742162	high
CGGA_1454	5.33151	0	5.97821	0.354885	3.6869	2.50743	1.03401	1.30669	2.91316	3.7038	0.780245	0.720573	3.78868	3.36889	5.08664	0.815464	1.77434	-0.5316	low
CGGA_1455	5.33151	0	1.83436	0.376209	0.377864	0.430623	0.60062	0.985066	0.77871	1.51482	1.0637	0.473146	2.32137	3.11933	1.55324	0.105522	1.34848	-0.253129	low
CGGA_1335	5.33425	0	6.58756	2.15555	2.47501	1.15642	3.81446	1.22989	2.55452	3.59318	0.551898	2.22237	3.67399	4.49486	6.75429	1.03533	2.57044	-0.991788	low
CGGA_1445	5.35616	0	1.98652	0.183449	-0.055848	0.251381	0.353709	0.724638	0.923589	2.85195	1.63632	0.0248904	2.38759	5.45485	1.69942	0.6129	1.14248	0.543169	high
CGGA_1446	5.35616	0	1.51391	0.582172	0.387587	0.380306	1.26223	1.11302	0.489697	1.44309	0.995578	0.667171	2.63128	3.0641	0.686008	0.0642182	1.27379	-0.415459	low
CGGA_1443	5.3589	0	5.28461	1.94595	0.836516	1.21324	0.533035	1.28157	3.38828	2.94531	1.37076	1.02602	2.44855	3.51924	7.03401	0.603397	1.23135	0.0612261	high
CGGA_1440	5.3726	0	6.10967	2.60459	1.76642	2.23933	4.47899	2.10506	2.52779	4.19714	1.494	2.59501	3.13016	4.02701	5.78272	1.22552	2.92483	-0.693805	low
CGGA_1431	5.41096	0	6.16494	2.82109	2.03948	1.85058	2.92119	1.52454	2.75869	4.07593	0.675883	1.7119	3.33199	4.3196	6.54594	1.25586	2.3088	-0.656255	low
CGGA_1429	5.4137	0	6.89265	2.29348	0.99974	0.205547	5.36468	1.66996	2.34323	3.09502	1.16812	2.26139	2.02121	5.41684	5.43028	0.132402	2.0422	-0.311161	low
CGGA_1086	5.41644	1	0.972816	0.0153486	-0.0160446	0.469581	0.198976	0.920381	0.797739	2.13935	1.74003	0.0248904	1.8236	3.001	2.38523	0.158779	1.06395	0.337477	high
CGGA_1424	5.43288	0	1.43013	0.816139	0.297447	0.228657	1.71236	1.3911	0.513483	1.3182	0.942351	0.694123	2.57143	2.27699	1.493	0.078121	1.36164	-0.573191	low
CGGA_1421	5.44384	0	6.09685	1.23657	3.16698	1.85406	1.06131	0.413776	2.00084	3.60304	0.429405	1.15402	4.62716	4.21891	6.20143	1.2438	1.8601	-1.01822	low
CGGA_1305	5.44932	0	5.87609	2.53371	1.84744	1.1271	3.30416	1.11302	2.69129	4.42267	0.896486	1.57488	3.0755	4.3595	7.51043	0.970689	1.77434	-0.29958	low
CGGA_1417	5.48219	0	6.02844	3.31596	1.20995	1.81526	4.14852	2.03798	2.39055	3.41822	1.92326	3.10522	2.30371	5.01695	4.18726	1.09714	3.29582	-0.68904	low
CGGA_1415	5.49863	0	4.72458	0.219488	0.338256	1.27312	0.451529	1.12731	3.7372	2.93808	2.67996	0.583114	1.6128	4.94008	6.31607	0.5549	2.12138	0.779236	high
CGGA_1413	5.50137	0	5.78655	2.45432	2.04232	1.49843	3.63583	2.02708	2.03733	3.34591	1.83695	2.75855	2.32575	4.29423	5.07644	0.739624	3.73288	-0.946419	low
CGGA_1407	5.52329	0	5.26696	2.86683	3.69107	0.82286	2.47786	0.529235	1.88469	2.96499	0.528196	0.975804	4.01167	3.61877	6.58286	1.51314	2.15563	-1.47176	low
CGGA_1404	5.5589	0	5.90357	2.52487	2.13011	1.68387	3.93669	1.14846	2.67825	3.95659	0.839505	1.96641	3.73044	3.80646	6.83389	0.985313	2.23959	-0.816579	low
CGGA_474	5.5589	0	5.41725	0.876276	0.368071	2.05726	0.0669513	2.20461	3.337	4.639	1.41736	0.134474	1.78079	4.40286	5.95038	1.25586	0.836947	1.15565	high
CGGA_1402	5.56164	0	4.75826	0.121202	0.472069	1.3953	2.8506	2.27018	3.72566	4.21709	1.89978	0.236224	2.21155	4.36558	6.55736	1.56232	1.12711	1.0931	high
CGGA_1400	5.56986	0	7.28285	3.48708	2.23728	0.632303	3.82553	1.14846	1.84352	3.46268	0.309771	1.97368	4.45483	5.38793	7.46763	0.831778	0.836947	-1.02951	low
CGGA_1390	5.61644	0	6.07549	0.777173	2.28073	2.50959	1.06131	1.37936	2.24301	3.63962	1.1912	0.885368	4.47201	3.13781	5.77615	1.27376	1.36818	-0.609261	low
CGGA_1386	5.63836	0	6.99067	3.29584	1.51463	0.640798	3.03627	0.437671	1.01449	2.95071	0.551898	1.92203	3.32202	4.51737	7.56983	1.44129	2.18539	-1.31175	low
CGGA_1232	5.66301	1	5.93866	2.13803	0.779809	0.623755	3.39356	3.36395	2.62245	4.43256	1.66432	2.58797	2.81215	3.98299	6.14402	0.910632	2.15563	-0.115322	low
CGGA_1377	5.66575	0	6.32207	2.90269	0.674436	0.262603	4.30974	2.48394	3.28631	4.52157	1.31563	2.35864	2.05947	4.63575	5.64026	0.36506	3.14038	-0.209851	low
CGGA_863	5.67945	1	5.58327	1.38657	0.690004	1.71504	1.96983	1.6067	2.9168	3.53589	1.54899	2.22237	1.87127	3.23594	5.94127	0.631715	2.77453	-0.131418	low
CGGA_1371	5.69589	0	6.05171	0.785055	0.0352599	2.88832	0.911603	1.34351	3.80892	4.05909	1.15252	0.121229	2.66521	4.13598	6.85012	3.99232	1.70389	0.659484	high
CGGA_1368	5.71233	0	2.21865	0.995953	0.943232	0.553368	2.2253	0.992938	0.489697	2.08836	1.51869	0.893128	2.85037	3.60937	2.07823	0.0501771	1.88303	-0.593518	low
CGGA_1361	5.73151	0	6.16116	1.64072	1.53131	1.25705	2.55811	1.66042	3.10699	3.77075	0.858744	2.4022	2.85037	4.24498	5.04304	0.695661	3.66653	-0.70587	low
CGGA_1362	5.73151	0	5.70887	0.386749	1.33062	3.17913	2.59879	1.61663	2.64954	4.1412	1.90922	1.94439	3.2178	4.39759	5.9957	1.02122	3.50491	-0.289876	low
CGGA_625	5.74795	1	6.14087	1.94932	1.73117	0.976847	3.04275	1.243	3.10072	3.29447	0.978048	2.41022	2.785	5.04872	7.61236	0.420406	2.32559	-0.408324	low
CGGA_1350	5.7726	0	2.10429	0.354885	0.720609	0.777659	1.59337	1.12731	0.71987	1.91042	1.31563	0.946293	2.55328	3.17077	1.22498	0.0642182	2.05436	-0.477648	low
CGGA_1345	5.78904	0	5.42694	1.86235	1.81091	1.3953	1.20861	0.506919	2.44145	2.9417	1.03003	1.83688	2.63985	4.15345	6.75454	2.20363	2.70201	-0.643064	low
CGGA_730	5.80274	1	5.29536	1.16691	1.68761	1.43844	2.34535	1.60171	2.16073	2.98087	1.97813	2.64788	2.36872	3.48609	5.51827	0.564734	3.40654	-0.722526	low
CGGA_1339	5.80822	0	6.48546	2.01193	1.11177	1.68781	4.69506	2.1085	2.62473	3.34326	1.4042	3.16295	2.06216	4.68729	5.769	0.494414	3.436	-0.561294	low
CGGA_1219	5.80822	1	8.04283	4.28379	0.69434	0.293452	5.11464	1.52444	2.94248	4.14487	0.989874	2.43128	2.58172	4.26886	5.48716	1.1031	1.67896	-0.53166	low
CGGA_1337	5.82466	0	5.85378	1.86951	2.76102	2.85701	0.147666	0.780898	2.26429	3.75821	0.718514	1.25355	3.73985	3.49124	7.13652	1.25586	1.88303	-0.757113	low
CGGA_1319	5.88767	0	6.21482	3.2547	1.93004	1.33048	3.12282	0.953111	2.67607	4.17336	0.429405	1.74206	4.24197	4.16132	7.22305	1.02829	1.60236	-0.834497	low
CGGA_1317	5.89589	0	1.4363	1.30825	1.13977	0.902026	1.94506	1.21666	0.739785	2.35977	0.790287	0.308032	2.85759	3.01386	0.919455	0.3423	2.04626	-0.647554	low
CGGA_1406	5.90137	1	4.35443	1.75205	0.374089	0.681836	3.41966	1.41031	3.54093	3.83858	1.01379	1.79889	3.34341	3.77325	5.85301	0.916963	2.49226	-0.201161	low
CGGA_107	5.90685	1	5.06788	0.195567	0.222914	2.88669	3.04113	2.17224	3.13638	4.5865	3.142	0.0530871	1.90209	4.6926	6.71854	2.59494	2.20005	1.07426	high
CGGA_1303	5.93973	0	1.41143	0.254607	0.863998	0.682496	0.376051	1.16238	0.402793	2.3456	0.933291	0.514124	3.44681	2.85295	1.90108	0.420406	1.96698	-0.635158	low
CGGA_1291	6	0	7.21745	2.68588	3.33661	1.92191	2.77426	1.00076	1.06915	3.30821	0.780245	1.8168	4.50569	4.34381	6.75353	2.49126	1.67786	-1.44229	low
CGGA_1286	6.01096	0	6.09807	3.41235	2.01077	1.27844	2.79181	1.02397	2.63154	3.38901	0.728983	2.47792	3.34581	4.12796	6.18188	1.17556	2.31554	-1.00049	low
CGGA_300	6.02466	1	4.33879	1.13336	1.96465	2.16904	2.11306	2.41694	1.68656	4.59818	0.915462	2.08801	3.38496	3.11308	6.57222	0.789776	2.38584	-0.445803	low
CGGA_1269	6.06575	0	6.99738	3.61436	1.78027	0.807958	4.99659	1.97879	2.14759	3.39541	1.12882	2.85735	2.85182	4.67499	4.54947	0.33078	2.45934	-1.0134	low
CGGA_1264	6.07397	0	6.15296	3.04811	1.22564	0.730908	3.89101	2.4656	2.92584	3.03077	1.76615	2.56663	2.95861	4.22267	5.73373	1.09041	3.33094	-0.949059	low
CGGA_815	6.07945	1	4.01772	0.449903	0.863888	1.31546	2.57193	1.78056	3.00837	3.74808	1.77273	1.61072	2.18336	3.7677	3.854	1.08958	3.01468	0.133716	high
CGGA_1256	6.11781	0	5.68358	0.919714	1.08895	3.68101	1.35819	1.23646	2.18661	4.17758	1.11281	0.553955	3.64402	4.20835	7.05682	2.55963	1.4068	0.073077	high
CGGA_822	6.12877	1	5.57142	2.08048	0.602949	0.221362	3.84978	2.46829	1.92658	4.05763	0.361825	1.93531	2.48682	5.11972	7.78169	0.730554	2.6286	-0.310492	low
CGGA_1409	6.16164	0	6.08753	3.24036	2.41616	0.891549	3.2265	2.49209	3.28506	4.55863	0.63273	1.29753	2.80333	3.6277	6.86372	0.547216	3.24717	-0.80214	low
CGGA_1231	6.24384	1	4.56505	0.933034	0.756804	2.14137	-0.15345	1.53362	3.33305	3.65476	1.52777	1.90824	2.44405	2.62193	10.1395	0.425406	0.928233	0.451237	high
CGGA_1239	6.24658	0	6.34269	2.89424	1.89887	0.929711	4.39695	2.27929	2.68696	3.1836	1.61926	2.81584	2.78804	4.52339	6.05285	1.09041	3.75269	-1.09159	low
CGGA_1238	6.25205	0	5.03202	2.69179	0.0601974	4.26297	3.66295	3.19985	2.58071	3.74946	1.5064	1.80461	2.27676	3.99369	5.4047	1.6284	2.82484	-0.105072	low
CGGA_1235	6.26575	0	5.36355	1.53554	1.92077	2.71484	1.78637	1.95591	2.654	3.08372	1.94178	2.25248	2.32356	3.52552	6.04947	0.97802	3.77708	-0.714949	low
CGGA_1212	6.27945	1	6.01049	2.82823	0.993577	0.880887	3.54327	2.4943	2.90769	4.20819	1.10473	1.98451	1.8073	4.17226	6.40944	2.07862	3.43907	-0.354156	low
CGGA_1228	6.29041	0	5.95353	2.69571	2.14333	2.95972	2.57181	2.40079	2.40954	3.8838	1.94178	1.10152	3.89198	3.13614	4.86461	1.07001	2.81302	-0.988427	low
CGGA_194	6.31233	1	6.56076	2.31691	2.37695	1.56022	3.89364	1.46501	2.73801	3.65229	1.16812	2.68354	3.10431	4.07634	5.62342	0.713411	2.75983	-0.864863	low
CGGA_1370	6.32877	0	4.72563	0.245881	0.230785	0.64797	1.6313	0.507385	1.99854	4.58573	1.63655	-0.0353457	1.77765	4.4675	2.14565	0.467117	2.22772	0.574378	high
CGGA_1211	6.36712	0	5.53344	1.85875	3.27901	0.909	3.48813	2.12895	2.61099	3.23372	2.37023	2.54496	2.19954	3.26511	6.06626	0.353726	4.0993	-1.08242	low
CGGA_1207	6.3863	0	4.93685	1.87308	3.08458	1.92851	1.80624	0.895302	1.97843	3.10304	0.707971	1.65413	4.13915	3.08334	5.6009	1.48279	2.47447	-1.29915	low
CGGA_1204	6.40548	0	6.94802	3.44341	1.51882	0.66597	5.10831	1.91293	2.74009	3.41571	1.09662	3.02441	2.85182	4.46069	5.15158	0.319166	2.51011	-0.895639	low
CGGA_235	6.41096	1	7.02836	2.30842	1.96465	1.45459	2.94738	1.47307	2.08721	2.88604	0.27441	1.97687	3.22298	3.3745	3.86084	0.84675	3.11481	-1.40429	low
CGGA_1342	6.42466	0	4.6901	0.245881	0.230785	1.83594	0.199559	1.96118	3.77567	3.19512	2.25138	0.645186	1.13974	5.15488	2.84925	1.39027	0.471592	1.50102	high
CGGA_1198	6.43562	0	1.54819	0.354885	0.200838	0.32806	0.956052	0.734179	0.465461	1.44874	0.942351	0.296312	2.38133	3.31287	0.855747	0.0501771	0.739042	-0.116859	low
CGGA_1192	6.47397	0	5.27022	1.8074	0.525583	1.43844	1.83359	2.69539	2.57599	3.93982	1.76096	2.20708	2.44059	4.25234	6.49602	1.11052	3.32432	-0.244503	low
CGGA_1191	6.47945	0	7.90366	3.23499	1.80754	0.217151	4.99659	2.71526	2.34323	3.57882	1.072	2.84168	2.59641	5.47734	6.04151	0.235074	1.08	-0.393783	low
CGGA_1330	6.48219	0	3.36859	1.35324	0.389308	1.41909	2.42398	1.58325	3.19508	3.11975	0.852822	2.40369	3.54027	3.93569	7.63806	1.46617	1.82519	-0.0919654	low
CGGA_D20	6.48493	1	4.25162	0.631045	2.5788	1.36066	2.04753	1.27219	2.06823	3.9571	1.29131	1.50674	4.49937	3.60829	2.36944	0.576185	2.45514	-0.784241	low
CGGA_493	6.52603	1	6.01898	2.21463	1.8636	1.45459	4.10405	1.59654	2.22993	3.9278	0.67607	2.29985	3.27967	4.16403	5.11493	0.477366	2.58284	-0.797202	low
CGGA_638	6.53699	0	6.86145	2.61211	2.37301	1.81909	3.4733	1.67842	1.35	3.04348	1.23618	2.14889	3.18291	4.50098	5.51479	0.650809	2.26461	-1.10417	low
CGGA_1307	6.54795	0	4.6348	1.61231	0.82892	0.692974	3.08392	1.21258	3.34595	4.13523	1.31805	2.10859	1.67703	4.20142	7.13418	1.54846	1.98686	0.444729	high
CGGA_1172	6.6137	0	5.04444	2.08714	0.981166	1.65601	2.59656	1.61167	3.59344	4.06217	1.08846	2.24351	2.48764	3.87211	7.23747	1.09714	1.98827	0.102766	high
CGGA_1292	6.63288	0	7.30369	2.19846	0.21411	2.75005	2.7355	0.169381	3.26958	2.95757	0.682149	0.49977	1.395	3.99499	5.54966	1.00575	1.70752	0.0838312	high
CGGA_1281	6.65479	0	5.67587	0.437878	2.70762	2.14601	0.619475	0.768642	1.96685	3.61742	1.25216	1.54222	3.82972	3.19286	3.0456	1.21341	3.00441	-0.963257	low
CGGA_908	6.67397	1	6.61685	1.90034	0.886817	0.376032	3.21713	1.58769	2.5801	3.7259	0.842093	2.49282	2.41925	4.34007	5.4689	1.51301	2.79402	-0.452398	low
CGGA_485	6.67671	0	4.75759	2.70385	1.56658	0.768916	3.27795	1.38555	1.23657	2.19523	1.50162	2.90382	1.98182	3.8007	4.53657	1.55346	3.78454	-1.28055	low
CGGA_1162	6.73151	0	6.16334	1.02926	1.93619	2.04824	1.04773	0.518123	1.2931	3.20447	0.253333	1.44443	4.55156	4.01132	7.61707	2.14091	1.13482	-0.8325	low
CGGA_1031	6.73151	1	5.74507	1.73049	1.01839	0.758277	3.62117	1.13938	1.83535	3.31955	0.831278	1.62499	2.59909	3.76326	4.72493	0.382502	3.09193	-0.815427	low
CGGA_1161	6.74795	0	6.22373	1.20798	2.17709	1.74174	3.60386	0.780898	2.33754	3.77554	0.504109	1.21704	4.39539	3.89712	6.81346	1.52311	2.00508	-0.82735	low
CGGA_1159	6.75068	0	5.80234	1.88019	3.02031	2.5203	2.04823	1.84785	2.38232	3.72285	0.707971	1.39634	3.98992	3.041	4.97899	0.963321	2.05031	-0.959977	low
CGGA_1158	6.76986	0	6.20978	3.44455	1.28663	0.370016	3.40107	2.22997	2.34039	3.3041	1.36398	2.46258	2.46237	4.05699	6.32989	0.235074	3.38125	-1.0455	low
CGGA_1156	6.7863	0	6.24806	3.8176	1.91142	0.777659	4.70775	2.79813	3.06728	4.56049	1.19882	2.0478	3.01331	4.09376	5.82053	0.985313	1.11937	-0.245985	low
CGGA_1152	6.80548	0	4.71865	2.37006	0.255363	3.68283	2.89086	1.36155	2.87625	3.9339	0.790287	1.52611	3.03354	4.41527	4.99685	1.76457	1.36164	0.190189	high
CGGA_1246	6.82466	0	7.85076	3.35563	1.48772	1.13833	4.29192	1.24535	2.28247	3.31955	0.67607	2.66567	2.59909	4.20571	5.11493	0.623258	2.71759	-1.08843	low
CGGA_1147	6.84384	0	6.12281	2.68786	1.45458	0.963545	3.47399	1.78386	2.76483	4.05832	1.17585	2.70754	2.91669	3.86334	6.19647	1.07001	3.91194	-0.98102	low
CGGA_1146	6.84384	0	6.17734	3.29696	1.31841	0.747569	3.71853	1.34007	3.04552	3.79457	1.47496	2.73838	2.19025	4.48505	6.99493	0.798049	2.6762	-0.462039	low
CGGA_666	6.84658	1	6.29632	3.70295	2.16716	1.39742	3.50337	2.02087	1.94278	3.42796	0.889715	1.68073	3.76066	3.36044	5.42812	0.477366	3.04508	-1.56851	low
CGGA_1144	6.86301	0	5.91248	0.73707	2.65018	2.05726	1.60254	1.62156	2.57362	3.82159	1.34345	1.3124	3.97861	3.14114	4.70127	1.1819	2.24667	-0.673648	low
CGGA_J130	6.86849	0	4.49334	0.162211	2.60873	2.71417	-0.15345	0.57251	1.65923	3.06647	1.15329	1.135	5.06946	2.73587	4.39748	0.756221	2.0503	-1.08861	low
CGGA_482	6.87945	1	6.36224	3.00811	0.910782	0.640798	4.88663	2.18852	2.68479	3.39285	1.5248	2.05124	1.93812	4.92408	5.09076	0.6129	2.78425	-0.414836	low
CGGA_1137	6.90137	0	1.42393	0.219488	0.0477864	0.738812	1.2207	0.808172	0.402793	1.7275	0.858744	0.308032	0.95206	2.88146	1.53167	0.210098	1.25273	0.171299	high
CGGA_1018	6.92329	1	6.57533	4.0995	2.62467	1.10318	4.90824	2.72834	2.9455	3.82343	1.072	2.93505	2.34956	4.48439	5.33094	0.79896	2.56197	-0.810725	low
CGGA_1131	6.93973	0	5.81621	2.71517	1.91766	0.0580045	5.04389	2.35292	3.41564	4.27453	1.19882	0.592703	2.10702	5.09798	6.19333	0.756833	1.93223	0.0909144	high
CGGA_1132	6.93973	0	5.5675	1.66994	1.73829	1.08496	3.11364	1.2879	1.58484	3.78127	1.17585	2.17913	2.2258	3.06762	6.00426	0.631715	2.98921	-0.739853	low
CGGA_1127	6.97808	0	5.6673	2.69179	2.81798	1.02241	2.16876	0.529235	1.4614	3.30547	0.479624	1.57008	3.46035	4.16758	7.49945	1.7047	2.29522	-1.19236	low
CGGA_336	6.98356	1	7.05384	2.35508	0.765251	0.182039	5.79745	2.75839	1.66902	4.13975	1.25838	2.51059	1.71552	4.3182	5.60992	0.319166	3.45884	-0.618791	low
CGGA_721	6.99178	1	6.38504	0.961822	2.0508	2.19401	3.41473	1.74395	2.43882	4.00403	2.73483	2.12804	2.6835	4.01132	6.17299	1.03533	3.66392	-0.520043	low
CGGA_1121	7.0137	0	6.49613	2.85117	0.377864	0.507457	4.29803	1.58156	2.91316	3.87762	0.858744	2.46515	2.24457	4.80939	6.8133	0.8559	2.62561	-0.311375	low
CGGA_314	7.03562	1	5.0479	2.4879	2.09466	1.33821	3.67974	1.95402	1.91844	2.58935	1.22406	1.81561	2.38156	3.47112	4.55665	0.747714	3.1338	-1.07487	low
CGGA_704	7.04658	1	6.51269	2.45703	0.920654	0.725945	4.05171	1.93961	2.9706	4.24791	0.920553	2.27271	1.94392	4.07375	5.12802	0.30434	1.98427	-0.044149	high
CGGA_1111	7.07397	0	5.68571	2.66801	1.06573	0.589015	4.01256	1.30669	3.03293	4.02633	1.34345	1.94809	2.5551	4.10934	7.26676	1.37112	1.28766	0.027756	high
CGGA_1100	7.11233	0	2.43714	1.98919	0.472069	0.902026	2.48271	2.08773	0.582309	2.84223	1.16812	0.21146	3.42669	4.083	1.69942	0.0501771	1.6726	-0.533697	low
CGGA_1189	7.12877	0	6.32758	3.15718	2.60873	1.104	4.96884	1.9576	1.50754	3.06647	1.48168	3.00704	1.79401	4.36914	4.72367	0.641681	3.67172	-1.23486	low
CGGA_1190	7.12877	0	7.95624	3.03352	2.39712	0.554142	5.70506	2.46028	1.83535	3.13385	0.528094	2.41755	3.15581	4.58739	5.19576	0.477366	1.41625	-1.01533	low
CGGA_1180	7.2	0	6.04575	2.61211	0.295935	2.88332	1.92484	1.79242	3.75257	4.37813	1.78616	1.55221	2.7172	4.76354	7.10472	1.79699	0.584656	0.727551	high
CGGA_634	7.2137	1	5.8324	1.88019	2.46676	2.33304	2.4459	1.76626	2.7951	3.54047	1.70266	2.204	2.76192	3.93565	5.14402	1.04234	3.28904	-0.721058	low
CGGA_273	7.21918	1	7.02541	2.41493	1.51969	0.58995	4.30709	0.95757	2.52492	3.75981	0.71214	2.53416	2.0412	4.12939	4.66781	0.414794	2.9412	-0.688721	low
CGGA_1065	7.34795	0	6.21104	3.88442	2.23728	0.145999	5.29746	2.27626	2.82272	3.50333	0.896486	2.1051	2.98495	4.20531	6.09919	0.210098	2.47447	-1.02802	low
CGGA_1027	7.36438	0	7.50366	3.15718	0.793235	0.376032	4.69573	1.68262	2.06823	2.9859	0.215674	1.73002	2.82961	3.85219	3.37304	0.713195	1.61676	-0.878712	low
CGGA_J030	7.60274	0	6.5759	1.91494	2.72357	2.19176	3.19443	1.45878	1.34473	2.78564	1.6425	2.73171	3.56708	3.74197	3.65891	0.393344	3.85732	-1.699	low
CGGA_D59	7.61096	0	5.00082	2.02716	0.477932	0.454708	2.72271	1.59654	2.54038	3.35575	1.0558	1.47037	1.37558	5.87359	4.50278	0.854716	1.85104	0.383956	high
CGGA_1095	7.61096	1	4.45326	2.82413	0.21411	0.221362	3.43938	0.824765	3.94416	5.13934	1.15756	1.49644	1.62504	4.88961	6.50371	1.29854	1.07129	0.986576	high
CGGA_680	7.63836	1	5.70647	2.1065	2.18347	1.72026	5.32532	1.29861	3.39685	3.15581	1.62153	2.93128	2.30429	3.78428	7.2704	0.257778	1.83386	-0.288797	low
CGGA_J024	7.67397	0	4.22526	2.31221	0.575932	0.130521	2.04359	1.64012	2.70948	3.62056	2.08019	2.22631	2.66731	2.68407	6.88883	0.984039	2.95593	-0.507932	low
CGGA_42	7.7589	1	5.85118	2.1173	1.88938	1.13302	3.28665	1.66519	2.40954	3.14857	1.64758	2.76688	1.70845	3.64657	5.64372	0.564734	3.57901	-0.772085	low
CGGA_1041	7.84384	0	5.26222	1.12459	1.93925	3.1765	3.3055	2.37847	2.55692	3.77171	2.10702	2.39952	2.21869	3.67044	5.20785	0.686701	3.27364	-0.304907	low
CGGA_1071	7.87945	0	6.69973	0.485448	0.180273	0.736792	0.148108	0.899069	2.75192	3.84559	2.23041	0.0639437	2.01911	4.37614	6.67195	0.747714	1.13787	0.68645	high
CGGA_269	8.03288	0	3.90727	1.72505	0.374089	3.99519	2.2083	1.57433	2.34056	2.64415	2.285	1.47562	2.74987	3.555	3.88636	1.33936	2.53914	-0.260757	low
CGGA_1030	8.03836	0	5.6095	1.90826	2.39671	1.70344	1.35273	1.95975	2.92223	3.67417	1.13676	1.36891	3.72316	3.62926	5.92335	1.08364	2.1367	-0.641201	low
CGGA_1052	8.12055	0	7.30596	2.77936	2.21565	1.82472	2.57476	0.342086	2.2511	2.59464	0.48666	2.7885	2.81913	3.6741	5.10177	0.854716	2.66648	-1.31762	low
CGGA_243	8.15616	0	7.10115	3.39683	1.70725	0.0178679	4.70749	1.8882	1.28047	2.29909	0.651476	2.61109	2.25801	4.60511	3.66808	0.0690559	3.07975	-1.47185	low
CGGA_890	8.16986	1	5.64115	2.54906	0.577051	1.67597	2.65123	2.6887	2.28226	4.42384	1.76615	2.70754	2.31478	3.97311	5.81718	0.64103	3.07472	-0.306385	low
CGGA_846	8.19452	0	5.76737	1.53554	1.96652	1.84359	0.793809	1.36155	3.23637	4.15559	0.969204	1.68553	3.11377	3.61525	5.72824	1.24985	1.5343	-0.0737291	low
CGGA_320	8.23288	1	6.20289	1.9694	2.17195	1.5943	3.49281	2.16896	2.48788	3.78412	1.78673	2.52788	2.93308	3.51672	5.87325	0.59383	4.09059	-1.09066	low
CGGA_1050	8.32877	0	5.74507	2.80749	1.12093	0.293452	4.12323	2.0618	0.990684	2.78564	0.215674	2.04598	2.03386	3.60462	4.90144	0.197468	2.76697	-1.11487	low
CGGA_D52	8.37534	0	7.62978	1.36008	4.38034	1.79063	3.56939	1.17355	0.915129	3.88986	0.620087	2.4009	4.26879	4.18239	6.04237	0.7219	2.30268	-1.51241	low
CGGA_1024	8.42192	1	3.47566	0.437878	0.463471	3.39477	3.83459	1.21258	2.35735	3.95048	2.23616	0.0362541	2.34325	4.87696	6.59297	0.677864	1.72935	0.737397	high
CGGA_D40	8.45205	0	7.2659	1.33255	1.34488	1.89629	2.68634	1.08682	1.02142	2.50004	1.31426	2.43401	3.78159	4.16929	6.67697	0.134634	3.50259	-1.54512	low
CGGA_1003	8.45753	0	5.14357	3.72623	1.84087	0.902026	3.74322	1.73038	1.96328	3.22937	1.62497	2.55463	2.72731	3.63506	5.84553	0.514866	3.48874	-1.28725	low
CGGA_583	8.51233	1	1.10759	0.322265	0.189663	0.0317837	0.331	1.21666	0.402793	1.49861	0.609544	0.483501	1.24318	2.27699	0.874283	0.210098	1.01467	-0.00491158	high
CGGA_1012	8.53699	0	5.24305	1.69855	0.0477864	0.769977	1.61619	2.29134	3.33438	4.05678	1.50021	2.34195	2.12505	4.28208	6.00761	0.999786	2.29863	0.309077	high
CGGA_893	8.65753	1	6.21994	2.75362	1.95233	1.47554	3.51586	1.65298	3.01834	3.51423	0.935711	2.12551	3.54796	3.61681	5.4291	0.677864	2.42283	-0.916504	low
CGGA_D29	8.68767	0	6.27489	1.7574	2.39232	1.65927	3.13421	1.43472	1.15184	2.46089	0.985039	2.35557	2.76066	3.57378	5.06194	0.991311	3.27739	-1.40527	low
CGGA_905	8.69589	1	4.54953	1.21003	0.575932	0.901372	2.15773	2.38928	1.77963	2.9794	1.8964	1.93914	1.71948	2.96284	6.11222	0.86264	3.14085	-0.39114	low
CGGA_D27	8.70685	0	7.01101	2.97677	1.02892	0.58995	4.75724	1.76861	0.735108	3.19317	1.02324	2.49282	2.51689	4.83131	2.95505	0.487546	3.07116	-1.1842	low
CGGA_D15	8.7589	0	8.08728	2.96669	2.71163	0.949637	4.8287	2.13439	0.664551	3.10554	0.905223	2.76256	3.16035	4.20485	3.63494	0.121746	2.77302	-1.67774	low
CGGA_889	8.80274	0	5.76358	1.03582	2.86804	2.13586	2.82436	1.10582	2.82662	3.62682	1.24371	1.27146	3.29369	3.81762	4.7265	1.31467	3.18863	-0.767964	low
CGGA_685	8.87397	1	5.62819	2.1321	1.95233	0.704037	3.40472	2.09517	2.81273	4.78659	0.868758	2.21685	3.06312	3.8148	4.51499	1.25049	3.07975	-0.563572	low
CGGA_1022	8.94521	0	4.004	0.338322	0.520609	2.03577	-0.0464149	1.73636	3.41772	3.66399	2.2776	0.315413	1.5986	4.54228	3.97636	1.25049	1.52709	1.05725	high
CGGA_1005	9.00274	0	5.62527	2.51819	2.38269	0.930498	4.70529	1.96831	2.27554	3.92646	0.894904	2.15879	3.38907	3.68113	3.93505	0.172649	3.19272	-1.13775	low
CGGA_1001	9.00822	0	4.28882	1.83554	0.434183	2.9011	1.3763	0.635267	3.88267	3.29935	0.97043	0.921944	2.45635	5.06065	7.07985	0.886162	2.07247	0.334046	high
CGGA_707	9.03836	1	5.13768	1.13072	2.15642	2.08397	1.23865	2.22367	2.02649	3.07722	2.1793	2.632	2.41437	3.62694	4.67597	0.64103	4.143	-0.897057	low
CGGA_871	9.15068	0	5.43199	3.45951	1.5433	1.4119	4.20983	2.80145	1.64544	3.00743	1.36998	2.4203	2.99111	3.81804	2.71628	0.269554	2.81766	-1.17458	low
CGGA_864	9.1863	0	4.07455	0.841638	1.27338	1.55677	1.08667	0.782845	1.72248	2.08901	1.7968	1.89649	2.73903	3.11471	4.59244	1.1298	3.24717	-0.883327	low
CGGA_858	9.20274	0	6.18791	1.40051	2.46288	1.44755	2.54055	1.00796	0.599075	3.62056	1.24419	1.8485	4.02542	3.35336	4.61213	0.991311	3.24499	-1.52023	low
CGGA_843	9.26027	0	7.27397	2.11935	1.40512	1.98035	4.46412	2.80364	0.728152	2.92213	1.29516	2.50066	2.99111	4.28285	3.56365	0.30434	2.57593	-1.12345	low
CGGA_838	9.27671	0	6.50234	2.32353	2.02495	1.7675	4.0922	2.07522	0.721175	2.7688	0.67607	1.8886	2.93684	3.73971	3.89313	0.806276	3.01084	-1.43605	low
CGGA_834	9.28219	0	4.41137	0.103924	0.145766	1.73814	3.56487	2.42515	2.07585	4.57126	1.75644	0.008032	1.7529	4.37303	5.17336	0.659882	1.55876	0.923855	high
CGGA_818	9.32055	0	4.69536	0.68373	1.57428	1.17197	1.05013	1.29336	2.75192	2.7396	1.54066	1.76486	3.79544	4.01335	4.75616	2.0501	2.77	-0.635876	low
CGGA_724	9.33151	0	6.28217	1.60655	2.55289	2.18039	2.86354	1.14846	2.75046	3.58657	1.21393	2.09183	3.44318	4.35406	6.59147	1.21937	2.55346	-0.697616	low
CGGA_812	9.34247	0	5.28537	1.25434	1.85709	1.77331	2.84855	1.21809	3.33089	3.33773	1.02324	2.34111	3.15581	4.03151	5.44567	1.49756	2.83078	-0.499617	low
CGGA_641	9.34521	1	7.29192	2.88639	2.22095	1.44755	3.98491	1.6487	1.72248	3.06022	0.915462	1.95435	2.89657	5.15046	4.16506	0.70444	2.68906	-1.09985	low
CGGA_807	9.35616	0	4.78207	0.485448	3.77582	2.50358	0.570188	0.588414	1.57994	2.91765	-0.0178706	1.40586	5.06946	2.96284	3.47094	1.35652	1.9151	-1.39856	low
CGGA_715	9.39452	0	6.23724	1.38715	2.86458	1.97007	2.84617	1.6615	1.54645	2.96852	0.894904	1.59147	4.229	3.35052	4.32889	0.878362	2.73475	-1.45035	low
CGGA_909	9.44658	0	6.81281	2.95146	2.01306	0.800431	3.99873	1.87323	0.769564	2.92882	1.45119	2.82865	2.84004	4.07931	4.73746	0.901642	3.53874	-1.59138	low
CGGA_785	9.47123	0	5.85083	2.02264	3.15399	1.60881	2.68371	1.2775	1.57042	2.82125	1.20774	2.87784	2.99111	3.47244	6.202	0.939657	3.34012	-1.44527	low
CGGA_283	9.50685	1	7.14546	2.21463	1.67856	2.02084	3.93319	1.22904	1.23657	2.9794	1.21593	2.44217	3.35178	3.51422	5.56554	0.909322	3.29438	-1.48222	low
CGGA_766	9.51233	0	7.429	3.62581	1.34488	0.800431	3.97447	3.01976	2.38397	3.20483	0.688201	2.81188	2.88129	4.61592	1.52455	0.425406	3.01979	-1.16581	low
CGGA_762	9.51781	0	5.6362	2.18622	2.31879	1.3078	2.85801	1.49661	1.28047	3.00099	1.55659	1.62025	3.42982	3.46184	4.86343	0.404107	3.03754	-1.35213	low
CGGA_663	9.53151	0	5.53248	2.11132	2.27358	1.26243	3.14852	2.02343	2.26731	3.78602	1.37751	2.14741	2.75101	3.56749	3.9212	0.78226	3.46337	-0.916665	low
CGGA_760	9.53151	0	5.7008	1.52227	1.64203	1.35321	2.28463	1.59654	1.84802	3.11975	1.06039	2.37841	3.42578	4.3527	3.71528	0.527588	3.28804	-1.04481	low
CGGA_752	9.55068	0	6.47473	2.12361	2.09466	1.36066	2.95183	2.10177	1.83958	3.61428	1.49832	2.50327	2.40048	3.90524	3.16635	0.789776	3.45137	-0.937047	low
CGGA_738	9.59178	0	5.77141	2.2622	1.12093	0.851666	3.23023	1.63581	2.09852	3.27707	2.24379	2.31768	1.65118	4.39619	3.12889	1.09635	2.33162	-0.190723	low
CGGA_420	9.6274	0	6.98028	3.3674	0.987386	0.0317837	4.94147	2.43359	2.28226	3.46632	0.924175	1.64047	2.59818	5.07097	5.17309	0.158779	1.10375	-0.333575	low
CGGA_725	9.74795	0	4.01772	1.42692	1.82415	2.0108	1.88173	1.55183	1.16332	2.29295	2.20521	2.70474	2.99598	3.1016	4.72493	0.425406	3.61524	-1.24659	low
CGGA_689	9.76164	0	8.36907	4.72822	2.49032	1.08656	4.24259	2.6453	1.06974	3.14386	0.594438	2.21685	2.8659	4.01719	4.3071	0.822597	1.54828	-1.44503	low
CGGA_675	9.80548	0	6.50234	2.54793	1.6272	1.3078	4.52199	2.19784	1.53194	2.592	1.55024	2.49282	3.16488	4.06911	5.27744	0.371582	3.31535	-1.38994	low
CGGA_671	9.81918	0	5.80905	1.54677	2.1562	1.18027	3.51431	0.912241	1.63157	3.49928	1.27187	2.51105	3.64571	3.44311	4.9552	0.976733	3.40025	-1.29075	low
CGGA_655	9.86301	0	7.23379	3.84407	2.23677	0.467467	4.97503	1.79635	1.93874	3.13385	0.729819	2.92153	2.83483	4.15345	4.55665	0.830691	2.84954	-1.43285	low
CGGA_565	9.87671	0	5.11917	0.878818	2.31879	2.34264	1.30242	1.85813	2.39716	2.83765	1.31426	0.760517	3.56327	2.61098	4.74621	0.886162	2.40348	-0.820123	low
CGGA_642	9.91233	0	4.87672	1.54068	1.11094	0.566164	3.35039	2.15048	2.09099	3.23938	0.718059	2.03886	2.79804	3.56754	3.63679	0.814459	3.11122	-0.76611	low
CGGA_635	9.94795	0	4.24161	2.25044	2.1507	0.681836	3.60948	1.39053	1.87729	2.38312	1.58481	2.41479	2.87104	3.32043	2.72398	1.46087	3.50167	-1.29032	low
CGGA_630	10.0493	0	6.52402	3.23609	2.1507	1.35321	4.10082	2.66442	2.50308	2.93993	0.574876	2.50846	3.71821	3.88048	3.24618	0.713195	2.43432	-1.3001	low
CGGA_605	10.0493	0	5.79543	1.13336	0.655758	0.441851	1.40609	1.69934	3.01585	2.23364	1.28357	1.44918	1.92858	4.44977	5.21799	0.487546	0.890157	0.257477	high
CGGA_598	10.074	1	6.62131	2.60265	1.98902	0.279282	4.59284	1.83522	1.39174	3.66399	1.23215	2.24814	2.22437	4.09311	5.87978	0.257778	3.08707	-0.999111	low
CGGA_560	10.1973	0	7.83941	3.68035	1.87656	0.376032	5.17791	2.01395	2.01031	3.16176	1.32182	2.87986	2.93684	4.41297	5.50244	0.245908	2.20781	-1.16249	low
CGGA_551	10.2137	0	6.65082	2.84334	2.49485	1.0953	3.05296	2.14406	1.88971	2.69245	0.999492	2.36418	3.05365	3.54869	4.25709	0.739159	3.31431	-1.53973	low
CGGA_543	10.2356	0	7.50506	2.64944	2.22095	0.901372	3.64285	1.6141	1.75343	2.83064	0.493655	2.00637	3.76416	2.98589	6.6391	1.01292	2.50866	-1.61464	low
CGGA_541	10.2493	0	5.00733	0.103924	3.80381	2.58392	0.390103	0.635267	1.83535	3.9345	0.836696	1.5016	4.51464	2.82724	3.64787	0.984039	1.75086	-0.845383	low
CGGA_510	10.3288	0	5.47261	1.80991	1.59715	0.670624	3.45885	1.2775	0.621115	2.22729	1.47159	2.76692	2.14863	3.3491	5.37081	0.798049	4.13402	-1.52334	low
CGGA_503	10.3479	0	5.38396	1.59351	1.85398	1.96427	3.15896	2.47611	2.49041	3.92198	1.68087	1.63588	2.63814	3.69389	4.58836	0.902942	2.75983	-0.370054	low
CGGA_502	10.3589	0	5.44456	1.62394	1.79734	0.36255	3.00213	1.52444	1.90207	3.12782	1.26008	1.94676	2.76604	2.87303	4.12801	0.96939	2.77302	-0.919604	low
CGGA_501	10.4055	0	6.861	2.63399	2.16169	1.5234	3.72399	1.46356	2.01031	2.70247	1.24019	2.68878	2.59331	4.124	6.35093	1.01292	3.1722	-1.2115	low
CGGA_494	10.4164	0	5.55721	0.388866	2.85724	2.23188	0.776418	1.45878	1.6362	3.4036	0.925625	0.785893	4.01601	2.54148	3.84885	0.487546	2.26675	-0.998359	low
CGGA_490	10.4219	0	6.75196	1.85576	2.41142	1.99565	2.51733	1.12784	2.15055	2.72236	1.12303	2.72278	3.26237	3.832	6.22566	0.814459	3.54409	-1.39379	low
CGGA_479	10.4438	0	6.12263	1.80991	1.34488	1.42625	2.66518	1.61847	0.889362	3.13786	1.06496	2.60139	2.27796	3.62649	4.9226	0.6689	2.71602	-0.881645	low
CGGA_446	10.5753	0	7.22794	3.83228	2.64648	0.0991043	4.25726	2.2918	1.65923	2.6849	0.154259	2.59651	1.85831	5.33953	4.60427	-0.0136166	3.13733	-1.36229	low
CGGA_431	10.5918	0	8.36056	3.84407	0.629554	0.389405	5.00384	1.69517	1.3969	2.86314	0.127056	1.66238	2.16258	5.33601	3.74749	0.556935	2.03281	-0.950956	low
CGGA_369	10.8411	0	6.15208	0.876276	2.67699	2.31332	1.93071	1.26884	2.5971	3.49744	0.504109	1.31815	3.55382	3.67718	5.94958	1.05624	2.02993	-0.62543	low
CGGA_265	10.8466	0	5.57634	2.45665	1.49349	0.74667	3.30416	2.00871	3.4388	4.0287	1.00427	2.32789	2.03501	4.07048	6.25171	0.887435	2.18539	-0.0548823	low
CGGA_323	11.0219	0	5.29037	0.29935	3.86672	1.96491	0.508942	0.314476	1.98275	3.54869	0.741477	1.72118	4.72082	2.70706	2.89301	0.814459	2.02273	-1.16567	low
CGGA_290	11.1644	0	4.80309	2.98924	0.949629	0.571308	3.42458	2.28533	2.27331	3.28755	1.74529	1.64959	2.25385	4.53774	2.90982	0.695661	3.99423	-0.821208	low
CGGA_D61	11.2027	0	8.52722	2.18213	3.85225	2.11795	2.33465	0.0546451	4.04665	3.83858	0.377127	2.30284	4.76223	4.09769	7.04267	0.789776	1.58292	-1.07005	low
CGGA_261	11.3151	0	5.92203	2.0892	1.73547	1.17197	2.89989	1.49193	2.36737	2.80234	0.47256	2.2666	3.58604	3.51035	5.2348	0.924566	2.64519	-1.16159	low
CGGA_254	11.3507	0	4.34361	1.58878	0.997142	1.7791	2.8438	1.18479	1.06974	2.7688	1.55024	2.51622	1.77765	3.31609	5.52615	0.371582	3.45326	-0.795164	low
CGGA_241	11.4055	0	5.42174	0.793927	3.43144	2.39936	1.90773	0.872418	1.9946	3.53072	1.20363	1.16768	4.61151	2.99642	3.72606	0.773092	2.37198	-1.16519	low
CGGA_106	11.9836	0	5.58741	0.407589	1.48065	3.35311	0.319504	1.5611	3.54208	3.72285	1.23632	1.48586	2.72251	3.73533	6.68662	1.40394	1.77434	0.293237	high
